# Supplementary material
Source: MDPI journal article supplement (https://www.mdpi.com/2073-4441/10/9/1276)
Supplement: s1 [file s1]

## Sheet: Foglio1
Date/Time	Solid Earth tides	Date/Time	Rn222(Bq/m3)	Date/Time	Groundwater level (m. a.s.l.)
2017-04-01	-0.112958	2017-04-01	21504	2017-04-01	226.528
2017-04-01 01:00:00	-0.085221	2017-04-01 00:10:00	20480	2017-04-01 00:05:00	226.526
2017-04-01 02:00:00	-0.056687	2017-04-01 00:20:00	21120	2017-04-01 00:10:00	226.528
2017-04-01 02:59:59	-0.0372	2017-04-01 00:30:00	20864	2017-04-01 00:15:00	226.528
2017-04-01 03:59:59	-0.033113	2017-04-01 00:40:00	21632	2017-04-01 00:20:00	226.529
2017-04-01 04:59:59	-0.045716	2017-04-01 00:50:00	21504	2017-04-01 00:25:00	226.527
2017-04-01 05:59:59	-0.071023	2017-04-01 01:00:00	21888	2017-04-01 00:30:00	226.528
2017-04-01 06:59:59	-0.100919	2017-04-01 01:10:00	22528	2017-04-01 00:35:00	226.528
2017-04-01 07:59:59	-0.125329	2017-04-01 01:20:00	22144	2017-04-01 00:40:00	226.527
2017-04-01 08:59:59	-0.134871	2017-04-01 01:30:00	21248	2017-04-01 00:45:00	226.53
2017-04-01 09:59:59	-0.123325	2017-04-01 01:40:00	21120	2017-04-01 00:50:00	226.531
2017-04-01 10:59:59	-0.089339	2017-04-01 01:50:00	20480	2017-04-01 00:55:00	226.528
2017-04-01 11:59:59	-0.036954	2017-04-01 02:00:00	22144	2017-04-01 01:00:00	226.528
2017-04-01 12:59:59	0.025178	2017-04-01 02:10:00	21120	2017-04-01 01:05:00	226.528
2017-04-01 13:59:59	0.085699	2017-04-01 02:20:00	20480	2017-04-01 01:10:00	226.529
2017-04-01 14:59:59	0.133122	2017-04-01 02:30:00	20224	2017-04-01 01:15:00	226.527
2017-04-01 15:59:59	0.15846	2017-04-01 02:40:00	21376	2017-04-01 01:20:00	226.53
2017-04-01 16:59:59	0.157259	2017-04-01 02:50:00	20608	2017-04-01 01:25:00	226.53
2017-04-01 17:59:59	0.130532	2017-04-01 03:00:00	20992	2017-04-01 01:30:00	226.528
2017-04-01 18:59:59	0.084393	2017-04-01 03:10:00	21376	2017-04-01 01:35:00	226.53
2017-04-01 19:59:59	0.028471	2017-04-01 03:20:00	20992	2017-04-01 01:40:00	226.529
2017-04-01 20:59:59	-0.02644	2017-04-01 03:30:00	20992	2017-04-01 01:45:00	226.528
2017-04-01 21:59:59	-0.070902	2017-04-01 03:40:00	21248	2017-04-01 01:50:00	226.53
2017-04-01 22:59:59	-0.098889	2017-04-01 03:50:00	21888	2017-04-01 01:55:00	226.53
2017-04-01 23:59:59	-0.108864	2017-04-01 04:00:00	20608	2017-04-01 02:00:00	226.531
2017-04-02 00:59:59	-0.103686	2017-04-01 04:10:00	21888	2017-04-01 02:05:00	226.529
2017-04-02 01:59:59	-0.089438	2017-04-01 04:20:00	21120	2017-04-01 02:10:00	226.53
2017-04-02 02:59:59	-0.073538	2017-04-01 04:30:00	21888	2017-04-01 02:15:00	226.53
2017-04-02 03:59:59	-0.062657	2017-04-01 04:40:00	22272	2017-04-01 02:20:00	226.531
2017-04-02 04:59:59	-0.060986	2017-04-01 04:50:00	20864	2017-04-01 02:25:00	226.53
2017-04-02 05:59:59	-0.069232	2017-04-01 05:00:00	21376	2017-04-01 02:30:00	226.53
2017-04-02 06:59:59	-0.084557	2017-04-01 05:10:00	19584	2017-04-01 02:35:00	226.531
2017-04-02 07:59:59	-0.101422	2017-04-01 05:20:00	21888	2017-04-01 02:40:00	226.53
2017-04-02 08:59:59	-0.11308	2017-04-01 05:30:00	20224	2017-04-01 02:45:00	226.533
2017-04-02 09:59:59	-0.113353	2017-04-01 05:40:00	20992	2017-04-01 02:50:00	226.533
2017-04-02 10:59:59	-0.098274	2017-04-01 05:50:00	21504	2017-04-01 02:55:00	226.532
2017-04-02 11:59:59	-0.067215	2017-04-01 06:00:00	20992	2017-04-01 03:00:00	226.531
2017-04-02 12:59:59	-0.023241	2017-04-01 06:10:00	21632	2017-04-01 03:05:00	226.532
2017-04-02 13:59:59	0.02739	2017-04-01 06:20:00	20864	2017-04-01 03:10:00	226.532
2017-04-02 14:59:59	0.076487	2017-04-01 06:30:00	20992	2017-04-01 03:15:00	226.531
2017-04-02 15:59:59	0.115652	2017-04-01 06:40:00	20608	2017-04-01 03:20:00	226.533
2017-04-02 16:59:59	0.138085	2017-04-01 06:50:00	20352	2017-04-01 03:25:00	226.531
2017-04-02 17:59:59	0.140046	2017-04-01 07:00:00	20608	2017-04-01 03:30:00	226.533
2017-04-02 18:59:59	0.121619	2017-04-01 07:10:00	21504	2017-04-01 03:35:00	226.53
2017-04-02 19:59:59	0.086606	2017-04-01 07:20:00	21760	2017-04-01 03:40:00	226.531
2017-04-02 20:59:59	0.041585	2017-04-01 07:30:00	21248	2017-04-01 03:45:00	226.531
2017-04-02 21:59:59	-0.005611	2017-04-01 07:40:00	20096	2017-04-01 03:50:00	226.533
2017-04-02 22:59:59	-0.047614	2017-04-01 07:50:00	20096	2017-04-01 03:55:00	226.533
2017-04-02 23:59:59	-0.07902	2017-04-01 08:00:00	20864	2017-04-01 04:00:00	226.533
2017-04-03 00:59:59	-0.09731	2017-04-01 08:10:00	20352	2017-04-01 04:05:00	226.533
2017-04-03 01:59:59	-0.103036	2017-04-01 08:20:00	20608	2017-04-01 04:10:00	226.533
2017-04-03 02:59:59	-0.099274	2017-04-01 08:30:00	21760	2017-04-01 04:15:00	226.534
2017-04-03 03:59:59	-0.090563	2017-04-01 08:40:00	19712	2017-04-01 04:20:00	226.533
2017-04-03 04:59:59	-0.081598	2017-04-01 08:50:00	21376	2017-04-01 04:25:00	226.533
2017-04-03 05:59:59	-0.076028	2017-04-01 09:00:00	22272	2017-04-01 04:30:00	226.531
2017-04-03 06:59:59	-0.0756	2017-04-01 09:10:00	22144	2017-04-01 04:35:00	226.531
2017-04-03 07:59:59	-0.079812	2017-04-01 09:20:00	20864	2017-04-01 04:40:00	226.535
2017-04-03 08:59:59	-0.086133	2017-04-01 09:30:00	21760	2017-04-01 04:45:00	226.535
2017-04-03 09:59:59	-0.090688	2017-04-01 09:40:00	20864	2017-04-01 04:50:00	226.534
2017-04-03 10:59:59	-0.089276	2017-04-01 09:50:00	20736	2017-04-01 04:55:00	226.535
2017-04-03 11:59:59	-0.078491	2017-04-01 10:00:00	21504	2017-04-01 05:00:00	226.532
2017-04-03 12:59:59	-0.056704	2017-04-01 10:10:00	20480	2017-04-01 05:05:00	226.534
2017-04-03 13:59:59	-0.024689	2017-04-01 10:20:00	21760	2017-04-01 05:10:00	226.534
2017-04-03 14:59:59	0.014267	2017-04-01 10:30:00	21888	2017-04-01 05:15:00	226.535
2017-04-03 15:59:59	0.054837	2017-04-01 10:40:00	21120	2017-04-01 05:20:00	226.534
2017-04-03 16:59:59	0.090637	2017-04-01 10:50:00	20864	2017-04-01 05:25:00	226.533
2017-04-03 17:59:59	0.115519	2017-04-01 11:00:00	21248	2017-04-01 05:30:00	226.532
2017-04-03 18:59:59	0.124879	2017-04-01 11:10:00	22784	2017-04-01 05:35:00	226.533
2017-04-03 19:59:59	0.11669	2017-04-01 11:20:00	21504	2017-04-01 05:40:00	226.534
2017-04-03 20:59:59	0.091974	2017-04-01 11:30:00	20992	2017-04-01 05:45:00	226.535
2017-04-03 21:59:59	0.054632	2017-04-01 11:40:00	22656	2017-04-01 05:50:00	226.531
2017-04-03 22:59:59	0.010632	2017-04-01 11:50:00	20480	2017-04-01 05:55:00	226.534
2017-04-03 23:59:59	-0.033219	2017-04-01 12:00:00	21248	2017-04-01 06:00:00	226.535
2017-04-04 00:59:59	-0.070639	2017-04-01 12:10:00	21760	2017-04-01 06:05:00	226.536
2017-04-04 01:59:59	-0.097065	2017-04-01 12:20:00	21888	2017-04-01 06:10:00	226.535
2017-04-04 02:59:59	-0.110423	2017-04-01 12:30:00	20480	2017-04-01 06:15:00	226.532
2017-04-04 03:59:59	-0.111323	2017-04-01 12:40:00	19456	2017-04-01 06:20:00	226.538
2017-04-04 04:59:59	-0.102691	2017-04-01 12:50:00	21632	2017-04-01 06:25:00	226.535
2017-04-04 05:59:59	-0.088922	2017-04-01 13:00:00	21504	2017-04-01 06:30:00	226.534
2017-04-04 06:59:59	-0.074774	2017-04-01 13:10:00	19840	2017-04-01 06:35:00	226.533
2017-04-04 07:59:59	-0.064217	2017-04-01 13:20:00	20864	2017-04-01 06:40:00	226.536
2017-04-04 08:59:59	-0.059497	2017-04-01 13:30:00	21632	2017-04-01 06:45:00	226.533
2017-04-04 09:59:59	-0.060604	2017-04-01 13:40:00	22144	2017-04-01 06:50:00	226.536
2017-04-04 10:59:59	-0.065282	2017-04-01 13:50:00	20992	2017-04-01 06:55:00	226.534
2017-04-04 11:59:59	-0.069603	2017-04-01 14:00:00	20352	2017-04-01 07:00:00	226.535
2017-04-04 12:59:59	-0.069008	2017-04-01 14:10:00	21504	2017-04-01 07:05:00	226.534
2017-04-04 13:59:59	-0.059589	2017-04-01 14:20:00	21120	2017-04-01 07:10:00	226.536
2017-04-04 14:59:59	-0.039314	2017-04-01 14:30:00	20224	2017-04-01 07:15:00	226.534
2017-04-04 15:59:59	-0.008866	2017-04-01 14:40:00	21248	2017-04-01 07:20:00	226.534
2017-04-04 16:59:59	0.028164	2017-04-01 14:50:00	21376	2017-04-01 07:25:00	226.536
2017-04-04 17:59:59	0.065829	2017-04-01 15:00:00	20992	2017-04-01 07:30:00	226.534
2017-04-04 18:59:59	0.097045	2017-04-01 15:10:00	21632	2017-04-01 07:35:00	226.535
2017-04-04 19:59:59	0.115194	2017-04-01 15:20:00	20608	2017-04-01 07:40:00	226.534
2017-04-04 20:59:59	0.115726	2017-04-01 15:30:00	20096	2017-04-01 07:45:00	226.537
2017-04-04 21:59:59	0.097341	2017-04-01 15:40:00	22400	2017-04-01 07:50:00	226.535
2017-04-04 22:59:59	0.06244	2017-04-01 15:50:00	20992	2017-04-01 07:55:00	226.537
2017-04-04 23:59:59	0.016719	2017-04-01 16:00:00	22144	2017-04-01 08:00:00	226.536
2017-04-05 00:59:59	-0.032015	2017-04-01 16:10:00	20736	2017-04-01 08:05:00	226.538
2017-04-05 01:59:59	-0.075515	2017-04-01 16:20:00	20864	2017-04-01 08:10:00	226.533
2017-04-05 02:59:59	-0.106863	2017-04-01 16:30:00	22144	2017-04-01 08:15:00	226.538
2017-04-05 03:59:59	-0.121923	2017-04-01 16:40:00	20608	2017-04-01 08:20:00	226.538
2017-04-05 04:59:59	-0.120154	2017-04-01 16:50:00	20864	2017-04-01 08:25:00	226.539
2017-04-05 05:59:59	-0.104592	2017-04-01 17:00:00	21632	2017-04-01 08:30:00	226.537
2017-04-05 06:59:59	-0.081025	2017-04-01 17:10:00	20096	2017-04-01 08:35:00	226.537
2017-04-05 07:59:59	-0.056531	2017-04-01 17:20:00	21120	2017-04-01 08:40:00	226.538
2017-04-05 08:59:59	-0.037726	2017-04-01 17:30:00	21376	2017-04-01 08:45:00	226.539
2017-04-05 09:59:59	-0.029111	2017-04-01 17:40:00	20224	2017-04-01 08:50:00	226.536
2017-04-05 10:59:59	-0.031933	2017-04-01 17:50:00	20736	2017-04-01 08:55:00	226.541
2017-04-05 11:59:59	-0.043837	2017-04-01 18:00:00	21504	2017-04-01 09:00:00	226.54
2017-04-05 12:59:59	-0.059452	2017-04-01 18:10:00	21248	2017-04-01 09:05:00	226.537
2017-04-05 13:59:59	-0.071796	2017-04-01 18:20:00	20864	2017-04-01 09:10:00	226.539
2017-04-05 14:59:59	-0.074189	2017-04-01 18:30:00	21632	2017-04-01 09:15:00	226.539
2017-04-05 15:59:59	-0.06219	2017-04-01 18:40:00	21120	2017-04-01 09:20:00	226.538
2017-04-05 16:59:59	-0.035047	2017-04-01 18:50:00	21888	2017-04-01 09:25:00	226.539
2017-04-05 17:59:59	0.003769	2017-04-01 19:00:00	21376	2017-04-01 09:30:00	226.54
2017-04-05 18:59:59	0.047141	2017-04-01 19:10:00	20608	2017-04-01 09:35:00	226.538
2017-04-05 19:59:59	0.085883	2017-04-01 19:20:00	22528	2017-04-01 09:40:00	226.541
2017-04-05 20:59:59	0.110969	2017-04-01 19:30:00	22144	2017-04-01 09:45:00	226.541
2017-04-05 21:59:59	0.115813	2017-04-01 19:40:00	21888	2017-04-01 09:50:00	226.54
2017-04-05 22:59:59	0.098024	2017-04-01 19:50:00	20992	2017-04-01 09:55:00	226.538
2017-04-05 23:59:59	0.060155	2017-04-01 20:00:00	22528	2017-04-01 10:00:00	226.541
2017-04-06 00:59:59	0.009237	2017-04-01 20:10:00	21504	2017-04-01 10:05:00	226.541
2017-04-06 01:59:59	-0.044796	2017-04-01 20:20:00	21504	2017-04-01 10:10:00	226.542
2017-04-06 02:59:59	-0.091395	2017-04-01 20:30:00	21504	2017-04-01 10:15:00	226.538
2017-04-06 03:59:59	-0.121851	2017-04-01 20:40:00	22912	2017-04-01 10:20:00	226.54
2017-04-06 04:59:59	-0.131295	2017-04-01 20:50:00	23040	2017-04-01 10:25:00	226.537
2017-04-06 05:59:59	-0.119783	2017-04-01 21:00:00	20736	2017-04-01 10:30:00	226.542
2017-04-06 06:59:59	-0.09218	2017-04-01 21:10:00	23168	2017-04-01 10:35:00	226.542
2017-04-06 07:59:59	-0.056898	2017-04-01 21:20:00	21376	2017-04-01 10:40:00	226.538
2017-04-06 08:59:59	-0.023773	2017-04-01 21:30:00	20992	2017-04-01 10:45:00	226.541
2017-04-06 09:59:59	-0.001582	2017-04-01 21:40:00	21120	2017-04-01 10:50:00	226.542
2017-04-06 10:59:59	0.004184	2017-04-01 21:50:00	21632	2017-04-01 10:55:00	226.54
2017-04-06 11:59:59	-0.007254	2017-04-01 22:00:00	22400	2017-04-01 11:00:00	226.543
2017-04-06 12:59:59	-0.031723	2017-04-01 22:10:00	22016	2017-04-01 11:05:00	226.54
2017-04-06 13:59:59	-0.061136	2017-04-01 22:20:00	20864	2017-04-01 11:10:00	226.542
2017-04-06 14:59:59	-0.085602	2017-04-01 22:30:00	20608	2017-04-01 11:15:00	226.543
2017-04-06 15:59:59	-0.09608	2017-04-01 22:40:00	21504	2017-04-01 11:20:00	226.543
2017-04-06 16:59:59	-0.086911	2017-04-01 22:50:00	21120	2017-04-01 11:25:00	226.542
2017-04-06 17:59:59	-0.057548	2017-04-01 23:00:00	21888	2017-04-01 11:30:00	226.543
2017-04-06 18:59:59	-0.012974	2017-04-01 23:10:00	20224	2017-04-01 11:35:00	226.542
2017-04-06 19:59:59	0.037337	2017-04-01 23:20:00	21760	2017-04-01 11:40:00	226.543
2017-04-06 20:59:59	0.081701	2017-04-01 23:30:00	22272	2017-04-01 11:45:00	226.545
2017-04-06 21:59:59	0.109173	2017-04-01 23:40:00	20992	2017-04-01 11:50:00	226.542
2017-04-06 22:59:59	0.112381	2017-04-01 23:50:00	22784	2017-04-01 11:55:00	226.544
2017-04-06 23:59:59	0.089517	2017-04-02	22016	2017-04-01 12:00:00	226.543
2017-04-07 00:59:59	0.044922	2017-04-02 00:10:00	20352	2017-04-01 12:05:00	226.543
2017-04-07 01:59:59	-0.011883	2017-04-02 00:20:00	21632	2017-04-01 12:10:00	226.543
2017-04-07 02:59:59	-0.068479	2017-04-02 00:30:00	20096	2017-04-01 12:15:00	226.546
2017-04-07 03:59:59	-0.112571	2017-04-02 00:40:00	19584	2017-04-01 12:20:00	226.544
2017-04-07 04:59:59	-0.134983	2017-04-02 00:50:00	22528	2017-04-01 12:25:00	226.545
2017-04-07 05:59:59	-0.131867	2017-04-02 01:00:00	22016	2017-04-01 12:30:00	226.545
2017-04-07 06:59:59	-0.105593	2017-04-02 01:10:00	20352	2017-04-01 12:35:00	226.545
2017-04-07 07:59:59	-0.064095	2017-04-02 01:20:00	21504	2017-04-01 12:40:00	226.541
2017-04-07 08:59:59	-0.018848	2017-04-02 01:30:00	21376	2017-04-01 12:45:00	226.544
2017-04-07 09:59:59	0.018043	2017-04-02 01:40:00	21888	2017-04-01 12:50:00	226.545
2017-04-07 10:59:59	0.036913	2017-04-02 01:50:00	20608	2017-04-01 12:55:00	226.546
2017-04-07 11:59:59	0.033007	2017-04-02 02:00:00	21248	2017-04-01 13:00:00	226.543
2017-04-07 12:59:59	0.007737	2017-04-02 02:10:00	21760	2017-04-01 13:05:00	226.546
2017-04-07 13:59:59	-0.031634	2017-04-02 02:20:00	20608	2017-04-01 13:10:00	226.544
2017-04-07 14:59:59	-0.073822	2017-04-02 02:30:00	21632	2017-04-01 13:15:00	226.548
2017-04-07 15:59:59	-0.106448	2017-04-02 02:40:00	22400	2017-04-01 13:20:00	226.546
2017-04-07 16:59:59	-0.119316	2017-04-02 02:50:00	20480	2017-04-01 13:25:00	226.544
2017-04-07 17:59:59	-0.107208	2017-04-02 03:00:00	20992	2017-04-01 13:30:00	226.544
2017-04-07 18:59:59	-0.071436	2017-04-02 03:10:00	19968	2017-04-01 13:35:00	226.547
2017-04-07 19:59:59	-0.019696	2017-04-02 03:20:00	20864	2017-04-01 13:40:00	226.544
2017-04-07 20:59:59	0.035771	2017-04-02 03:30:00	20736	2017-04-01 13:45:00	226.547
2017-04-07 21:59:59	0.081265	2017-04-02 03:40:00	20096	2017-04-01 13:50:00	226.547
2017-04-07 22:59:59	0.105171	2017-04-02 03:50:00	20864	2017-04-01 13:55:00	226.547
2017-04-07 23:59:59	0.101013	2017-04-02 04:00:00	20864	2017-04-01 14:00:00	226.547
2017-04-08 00:59:59	0.069211	2017-04-02 04:10:00	22144	2017-04-01 14:05:00	226.546
2017-04-08 01:59:59	0.017058	2017-04-02 04:20:00	19712	2017-04-01 14:10:00	226.549
2017-04-08 02:59:59	-0.04307	2017-04-02 04:30:00	21120	2017-04-01 14:15:00	226.547
2017-04-08 03:59:59	-0.096819	2017-04-02 04:40:00	20864	2017-04-01 14:20:00	226.547
2017-04-08 04:59:59	-0.13147	2017-04-02 04:50:00	19968	2017-04-01 14:25:00	226.546
2017-04-08 05:59:59	-0.139123	2017-04-02 05:00:00	20736	2017-04-01 14:30:00	226.549
2017-04-08 06:59:59	-0.118664	2017-04-02 05:10:00	21760	2017-04-01 14:35:00	226.549
2017-04-08 07:59:59	-0.076005	2017-04-02 05:20:00	21504	2017-04-01 14:40:00	226.546
2017-04-08 08:59:59	-0.022569	2017-04-02 05:30:00	21760	2017-04-01 14:45:00	226.545
2017-04-08 09:59:59	0.02761	2017-04-02 05:40:00	22016	2017-04-01 14:50:00	226.547
2017-04-08 10:59:59	0.061445	2017-04-02 05:50:00	19712	2017-04-01 14:55:00	226.545
2017-04-08 11:59:59	0.070119	2017-04-02 06:00:00	20992	2017-04-01 15:00:00	226.548
2017-04-08 12:59:59	0.051347	2017-04-02 06:10:00	21248	2017-04-01 15:05:00	226.547
2017-04-08 13:59:59	0.010002	2017-04-02 06:20:00	21376	2017-04-01 15:10:00	226.549
2017-04-08 14:59:59	-0.043086	2017-04-02 06:30:00	20352	2017-04-01 15:15:00	226.55
2017-04-08 15:59:59	-0.093873	2017-04-02 06:40:00	20608	2017-04-01 15:20:00	226.548
2017-04-08 16:59:59	-0.128712	2017-04-02 06:50:00	21504	2017-04-01 15:25:00	226.547
2017-04-08 17:59:59	-0.137931	2017-04-02 07:00:00	19712	2017-04-01 15:30:00	226.549
2017-04-08 18:59:59	-0.118427	2017-04-02 07:10:00	21376	2017-04-01 15:35:00	226.55
2017-04-08 19:59:59	-0.074585	2017-04-02 07:20:00	20736	2017-04-01 15:40:00	226.546
2017-04-08 20:59:59	-0.017245	2017-04-02 07:30:00	20992	2017-04-01 15:45:00	226.549
2017-04-08 21:59:59	0.039056	2017-04-02 07:40:00	19072	2017-04-01 15:50:00	226.552
2017-04-08 22:59:59	0.079848	2017-04-02 07:50:00	21120	2017-04-01 15:55:00	226.55
2017-04-08 23:59:59	0.094523	2017-04-02 08:00:00	21248	2017-04-01 16:00:00	226.549
2017-04-09 00:59:59	0.079147	2017-04-02 08:10:00	20608	2017-04-01 16:05:00	226.55
2017-04-09 01:59:59	0.037532	2017-04-02 08:20:00	21120	2017-04-01 16:10:00	226.55
2017-04-09 02:59:59	-0.019711	2017-04-02 08:30:00	19840	2017-04-01 16:15:00	226.548
2017-04-09 03:59:59	-0.077902	2017-04-02 08:40:00	20864	2017-04-01 16:20:00	226.55
2017-04-09 04:59:59	-0.122071	2017-04-02 08:50:00	19584	2017-04-01 16:25:00	226.551
2017-04-09 05:59:59	-0.140811	2017-04-02 09:00:00	20992	2017-04-01 16:30:00	226.55
2017-04-09 06:59:59	-0.129206	2017-04-02 09:10:00	21632	2017-04-01 16:35:00	226.55
2017-04-09 07:59:59	-0.090081	2017-04-02 09:20:00	19968	2017-04-01 16:40:00	226.55
2017-04-09 08:59:58	-0.033292	2017-04-02 09:30:00	21120	2017-04-01 16:45:00	226.55
2017-04-09 09:59:58	0.026775	2017-04-02 09:40:00	21120	2017-04-01 16:50:00	226.549
2017-04-09 10:59:58	0.07484	2017-04-02 09:50:00	22272	2017-04-01 16:55:00	226.55
2017-04-09 11:59:58	0.098591	2017-04-02 10:00:00	22528	2017-04-01 17:00:00	226.549
2017-04-09 12:59:58	0.091803	2017-04-02 10:10:00	22528	2017-04-01 17:05:00	226.55
2017-04-09 13:59:58	0.055936	2017-04-02 10:20:00	20224	2017-04-01 17:10:00	226.551
2017-04-09 14:59:58	-0.000204	2017-04-02 10:30:00	21888	2017-04-01 17:15:00	226.55
2017-04-09 15:59:58	-0.062662	2017-04-02 10:40:00	22272	2017-04-01 17:20:00	226.55
2017-04-09 16:59:58	-0.115867	2017-04-02 10:50:00	20736	2017-04-01 17:25:00	226.551
2017-04-09 17:59:58	-0.146604	2017-04-02 11:00:00	20992	2017-04-01 17:30:00	226.55
2017-04-09 18:59:58	-0.147418	2017-04-02 11:10:00	22272	2017-04-01 17:35:00	226.551
2017-04-09 19:59:58	-0.11856	2017-04-02 11:20:00	22272	2017-04-01 17:40:00	226.55
2017-04-09 20:59:58	-0.067941	2017-04-02 11:30:00	23296	2017-04-01 17:45:00	226.551
2017-04-09 21:59:58	-0.009089	2017-04-02 11:40:00	21504	2017-04-01 17:50:00	226.55
2017-04-09 22:59:58	0.042394	2017-04-02 11:50:00	21632	2017-04-01 17:55:00	226.549
2017-04-09 23:59:58	0.072939	2017-04-02 12:00:00	22912	2017-04-01 18:00:00	226.55
2017-04-10 00:59:58	0.074589	2017-04-02 12:10:00	20352	2017-04-01 18:05:00	226.55
2017-04-10 01:59:58	0.047119	2017-04-02 12:20:00	22272	2017-04-01 18:10:00	226.551
2017-04-10 02:59:58	-0.0019	2017-04-02 12:30:00	20992	2017-04-01 18:15:00	226.552
2017-04-10 03:59:58	-0.059088	2017-04-02 12:40:00	22528	2017-04-01 18:20:00	226.552
2017-04-10 04:59:58	-0.108773	2017-04-02 12:50:00	21760	2017-04-01 18:25:00	226.552
2017-04-10 05:59:58	-0.137106	2017-04-02 13:00:00	23168	2017-04-01 18:30:00	226.552
2017-04-10 06:59:58	-0.135688	2017-04-02 13:10:00	22016	2017-04-01 18:35:00	226.552
2017-04-10 07:59:58	-0.103782	2017-04-02 13:20:00	22400	2017-04-01 18:40:00	226.549
2017-04-10 08:59:58	-0.048537	2017-04-02 13:30:00	21504	2017-04-01 18:45:00	226.552
2017-04-10 09:59:58	0.016794	2017-04-02 13:40:00	21248	2017-04-01 18:50:00	226.552
2017-04-10 10:59:58	0.076195	2017-04-02 13:50:00	22272	2017-04-01 18:55:00	226.552
2017-04-10 11:59:58	0.114915	2017-04-02 14:00:00	21248	2017-04-01 19:00:00	226.553
2017-04-10 12:59:58	0.123175	2017-04-02 14:10:00	20480	2017-04-01 19:05:00	226.552
2017-04-10 13:59:58	0.098629	2017-04-02 14:20:00	22272	2017-04-01 19:10:00	226.55
2017-04-10 14:59:58	0.046962	2017-04-02 14:30:00	21760	2017-04-01 19:15:00	226.549
2017-04-10 15:59:58	-0.019526	2017-04-02 14:40:00	21504	2017-04-01 19:20:00	226.554
2017-04-10 16:59:58	-0.085	2017-04-02 14:50:00	21632	2017-04-01 19:25:00	226.551
2017-04-10 17:59:58	-0.13407	2017-04-02 15:00:00	20992	2017-04-01 19:30:00	226.552
2017-04-10 18:59:58	-0.155665	2017-04-02 15:10:00	21376	2017-04-01 19:35:00	226.55
2017-04-10 19:59:58	-0.145812	2017-04-02 15:20:00	22144	2017-04-01 19:40:00	226.551
2017-04-10 20:59:58	-0.108594	2017-04-02 15:30:00	20736	2017-04-01 19:45:00	226.555
2017-04-10 21:59:58	-0.055024	2017-04-02 15:40:00	20224	2017-04-01 19:50:00	226.553
2017-04-10 22:59:58	-0.000104	2017-04-02 15:50:00	21376	2017-04-01 19:55:00	226.554
2017-04-10 23:59:58	0.041157	2017-04-02 16:00:00	20736	2017-04-01 20:00:00	226.553
2017-04-11 00:59:58	0.057726	2017-04-02 16:10:00	21120	2017-04-01 20:05:00	226.554
2017-04-11 01:59:58	0.045474	2017-04-02 16:20:00	20736	2017-04-01 20:10:00	226.553
2017-04-11 02:59:58	0.008256	2017-04-02 16:30:00	20736	2017-04-01 20:15:00	226.551
2017-04-11 03:59:58	-0.043129	2017-04-02 16:40:00	20352	2017-04-01 20:20:00	226.552
2017-04-11 04:59:58	-0.093834	2017-04-02 16:50:00	21760	2017-04-01 20:25:00	226.554
2017-04-11 05:59:58	-0.128924	2017-04-02 17:00:00	20352	2017-04-01 20:30:00	226.551
2017-04-11 06:59:58	-0.137355	2017-04-02 17:10:00	21504	2017-04-01 20:35:00	226.55
2017-04-11 07:59:58	-0.114931	2017-04-02 17:20:00	21376	2017-04-01 20:40:00	226.556
2017-04-11 08:59:58	-0.065469	2017-04-02 17:30:00	21760	2017-04-01 20:45:00	226.556
2017-04-11 09:59:58	0.000107	2017-04-02 17:40:00	20096	2017-04-01 20:50:00	226.555
2017-04-11 10:59:58	0.066487	2017-04-02 17:50:00	20992	2017-04-01 20:55:00	226.553
2017-04-11 11:59:58	0.11781	2017-04-02 18:00:00	20608	2017-04-01 21:00:00	226.554
2017-04-11 12:59:58	0.141623	2017-04-02 18:10:00	21120	2017-04-01 21:05:00	226.553
2017-04-11 13:59:58	0.131978	2017-04-02 18:20:00	20608	2017-04-01 21:10:00	226.553
2017-04-11 14:59:58	0.090906	2017-04-02 18:30:00	20992	2017-04-01 21:15:00	226.553
2017-04-11 15:59:58	0.027886	2017-04-02 18:40:00	21376	2017-04-01 21:20:00	226.558
2017-04-11 16:59:58	-0.042522	2017-04-02 18:50:00	21120	2017-04-01 21:25:00	226.555
2017-04-11 17:59:58	-0.104308	2017-04-02 19:00:00	22272	2017-04-01 21:30:00	226.555
2017-04-11 18:59:58	-0.143985	2017-04-02 19:10:00	19840	2017-04-01 21:35:00	226.552
2017-04-11 19:59:58	-0.153913	2017-04-02 19:20:00	20864	2017-04-01 21:40:00	226.557
2017-04-11 20:59:58	-0.134109	2017-04-02 19:30:00	22272	2017-04-01 21:45:00	226.556
2017-04-11 21:59:58	-0.092095	2017-04-02 19:40:00	20864	2017-04-01 21:50:00	226.556
2017-04-11 22:59:58	-0.040803	2017-04-02 19:50:00	22016	2017-04-01 21:55:00	226.555
2017-04-11 23:59:58	0.00492	2017-04-02 20:00:00	21376	2017-04-01 22:00:00	226.556
2017-04-12 00:59:58	0.032287	2017-04-02 20:10:00	22784	2017-04-01 22:05:00	226.556
2017-04-12 01:59:58	0.033982	2017-04-02 20:20:00	20480	2017-04-01 22:10:00	226.557
2017-04-12 02:59:58	0.010091	2017-04-02 20:30:00	21760	2017-04-01 22:15:00	226.552
2017-04-12 03:59:58	-0.031956	2017-04-02 20:40:00	21120	2017-04-01 22:20:00	226.554
2017-04-12 04:59:58	-0.079413	2017-04-02 20:50:00	20352	2017-04-01 22:25:00	226.557
2017-04-12 05:59:58	-0.11767	2017-04-02 21:00:00	20992	2017-04-01 22:30:00	226.556
2017-04-12 06:59:58	-0.134204	2017-04-02 21:10:00	23168	2017-04-01 22:35:00	226.556
2017-04-12 07:59:58	-0.121971	2017-04-02 21:20:00	20480	2017-04-01 22:40:00	226.556
2017-04-12 08:59:58	-0.081358	2017-04-02 21:30:00	20608	2017-04-01 22:45:00	226.552
2017-04-12 09:59:58	-0.020198	2017-04-02 21:40:00	22144	2017-04-01 22:50:00	226.557
2017-04-12 10:59:58	0.048139	2017-04-02 21:50:00	21632	2017-04-01 22:55:00	226.557
2017-04-12 11:59:58	0.108061	2017-04-02 22:00:00	21248	2017-04-01 23:00:00	226.555
2017-04-12 12:59:58	0.145632	2017-04-02 22:10:00	20864	2017-04-01 23:05:00	226.555
2017-04-12 13:59:58	0.152002	2017-04-02 22:20:00	22272	2017-04-01 23:10:00	226.556
2017-04-12 14:59:58	0.125571	2017-04-02 22:30:00	20992	2017-04-01 23:15:00	226.559
2017-04-12 15:59:58	0.072333	2017-04-02 22:40:00	20864	2017-04-01 23:20:00	226.557
2017-04-12 16:59:58	0.004352	2017-04-02 22:50:00	20992	2017-04-01 23:25:00	226.558
2017-04-12 17:59:58	-0.063239	2017-04-02 23:00:00	21504	2017-04-01 23:30:00	226.557
2017-04-12 18:59:58	-0.115972	2017-04-02 23:10:00	21504	2017-04-01 23:35:00	226.559
2017-04-12 19:59:58	-0.143559	2017-04-02 23:20:00	20608	2017-04-01 23:40:00	226.557
2017-04-12 20:59:58	-0.142319	2017-04-02 23:30:00	19840	2017-04-01 23:45:00	226.558
2017-04-12 21:59:58	-0.115901	2017-04-02 23:40:00	21632	2017-04-01 23:50:00	226.559
2017-04-12 22:59:58	-0.074127	2017-04-02 23:50:00	19968	2017-04-01 23:55:00	226.556
2017-04-12 23:59:58	-0.030249	2017-04-03	21376	2017-04-02	226.557
2017-04-13 00:59:58	0.002652	2017-04-03 00:10:00	19840	2017-04-02 00:05:00	226.556
2017-04-13 01:59:58	0.015187	2017-04-03 00:20:00	20352	2017-04-02 00:10:00	226.559
2017-04-13 02:59:58	0.004168	2017-04-03 00:30:00	21760	2017-04-02 00:15:00	226.557
2017-04-13 03:59:58	-0.026582	2017-04-03 00:40:00	21248	2017-04-02 00:20:00	226.559
2017-04-13 04:59:58	-0.067299	2017-04-03 00:50:00	20992	2017-04-02 00:25:00	226.556
2017-04-13 05:59:58	-0.104964	2017-04-03 01:00:00	20736	2017-04-02 00:30:00	226.555
2017-04-13 06:59:58	-0.126862	2017-04-03 01:10:00	22272	2017-04-02 00:35:00	226.558
2017-04-13 07:59:58	-0.124071	2017-04-03 01:20:00	21376	2017-04-02 00:40:00	226.558
2017-04-13 08:59:58	-0.093938	2017-04-03 01:30:00	21120	2017-04-02 00:45:00	226.56
2017-04-13 09:59:58	-0.040921	2017-04-03 01:40:00	20736	2017-04-02 00:50:00	226.556
2017-04-13 10:59:58	0.02443	2017-04-03 01:50:00	21632	2017-04-02 00:55:00	226.56
2017-04-13 11:59:58	0.088049	2017-04-03 02:00:00	21632	2017-04-02 01:00:00	226.561
2017-04-13 12:59:58	0.135817	2017-04-03 02:10:00	21120	2017-04-02 01:05:00	226.561
2017-04-13 13:59:58	0.157024	2017-04-03 02:20:00	21888	2017-04-02 01:10:00	226.56
2017-04-13 14:59:58	0.146947	2017-04-03 02:30:00	21120	2017-04-02 01:15:00	226.562
2017-04-13 15:59:58	0.107948	2017-04-03 02:40:00	21888	2017-04-02 01:20:00	226.559
2017-04-13 16:59:58	0.048807	2017-04-03 02:50:00	21376	2017-04-02 01:25:00	226.561
2017-04-13 17:59:58	-0.01748	2017-04-03 03:00:00	21248	2017-04-02 01:30:00	226.56
2017-04-13 18:59:58	-0.076905	2017-04-03 03:10:00	20992	2017-04-02 01:35:00	226.562
2017-04-13 19:59:58	-0.117827	2017-04-03 03:20:00	20864	2017-04-02 01:40:00	226.56
2017-04-13 20:59:58	-0.133697	2017-04-03 03:30:00	20992	2017-04-02 01:45:00	226.561
2017-04-13 21:59:58	-0.124467	2017-04-03 03:40:00	20480	2017-04-02 01:50:00	226.561
2017-04-13 22:59:58	-0.096317	2017-04-03 03:50:00	20480	2017-04-02 01:55:00	226.561
2017-04-13 23:59:58	-0.059808	2017-04-03 04:00:00	20736	2017-04-02 02:00:00	226.561
2017-04-14 00:59:58	-0.026932	2017-04-03 04:10:00	20608	2017-04-02 02:05:00	226.561
2017-04-14 01:59:58	-0.007834	2017-04-03 04:20:00	21376	2017-04-02 02:10:00	226.561
2017-04-14 02:59:58	-0.008081	2017-04-03 04:30:00	19840	2017-04-02 02:15:00	226.561
2017-04-14 03:59:58	-0.027183	2017-04-03 04:40:00	20352	2017-04-02 02:20:00	226.561
2017-04-14 04:59:58	-0.058775	2017-04-03 04:50:00	20480	2017-04-02 02:25:00	226.56
2017-04-14 05:59:58	-0.092396	2017-04-03 05:00:00	21632	2017-04-02 02:30:00	226.559
2017-04-14 06:59:58	-0.116381	2017-04-03 05:10:00	22656	2017-04-02 02:35:00	226.561
2017-04-14 07:59:58	-0.121089	2017-04-03 05:20:00	21376	2017-04-02 02:40:00	226.561
2017-04-14 08:59:58	-0.101603	2017-04-03 05:30:00	19328	2017-04-02 02:45:00	226.557
2017-04-14 09:59:58	-0.059178	2017-04-03 05:40:00	22400	2017-04-02 02:50:00	226.561
2017-04-14 10:59:58	-0.001081	2017-04-03 05:50:00	19712	2017-04-02 02:55:00	226.56
2017-04-14 11:59:58	0.061132	2017-04-03 06:00:00	22144	2017-04-02 03:00:00	226.562
2017-04-14 12:59:58	0.114418	2017-04-03 06:10:00	19840	2017-04-02 03:05:00	226.561
2017-04-14 13:59:58	0.147416	2017-04-03 06:20:00	21504	2017-04-02 03:10:00	226.562
2017-04-14 14:59:58	0.153166	2017-04-03 06:30:00	19968	2017-04-02 03:15:00	226.559
2017-04-14 15:59:58	0.130711	2017-04-03 06:40:00	20992	2017-04-02 03:20:00	226.562
2017-04-14 16:59:58	0.085229	2017-04-03 06:50:00	21888	2017-04-02 03:25:00	226.558
2017-04-14 17:59:58	0.026673	2017-04-03 07:00:00	20480	2017-04-02 03:30:00	226.561
2017-04-14 18:59:58	-0.032691	2017-04-03 07:10:00	20480	2017-04-02 03:35:00	226.563
2017-04-14 19:59:58	-0.081241	2017-04-03 07:20:00	22016	2017-04-02 03:40:00	226.56
2017-04-14 20:59:58	-0.1107	2017-04-03 07:30:00	20736	2017-04-02 03:45:00	226.563
2017-04-14 21:59:58	-0.117951	2017-04-03 07:40:00	20096	2017-04-02 03:50:00	226.563
2017-04-14 22:59:58	-0.105508	2017-04-03 07:50:00	21120	2017-04-02 03:55:00	226.562
2017-04-14 23:59:58	-0.080564	2017-04-03 08:00:00	20224	2017-04-02 04:00:00	226.561
2017-04-15 00:59:58	-0.052869	2017-04-03 08:10:00	19328	2017-04-02 04:05:00	226.562
2017-04-15 01:59:58	-0.032005	2017-04-03 08:20:00	20608	2017-04-02 04:10:00	226.561
2017-04-15 02:59:58	-0.024758	2017-04-03 08:30:00	20224	2017-04-02 04:15:00	226.56
2017-04-15 03:59:58	-0.033293	2017-04-03 08:40:00	20864	2017-04-02 04:20:00	226.562
2017-04-15 04:59:58	-0.054602	2017-04-03 08:50:00	20864	2017-04-02 04:25:00	226.564
2017-04-15 05:59:58	-0.081373	2017-04-03 09:00:00	20992	2017-04-02 04:30:00	226.562
2017-04-15 06:59:58	-0.104037	2017-04-03 09:10:00	20992	2017-04-02 04:35:00	226.562
2017-04-15 07:59:58	-0.113443	2017-04-03 09:20:00	21376	2017-04-02 04:40:00	226.563
2017-04-15 08:59:58	-0.103434	2017-04-03 09:30:00	21760	2017-04-02 04:45:00	226.563
2017-04-15 09:59:58	-0.072637	2017-04-03 09:40:00	20992	2017-04-02 04:50:00	226.563
2017-04-15 10:59:58	-0.024994	2017-04-03 09:50:00	20864	2017-04-02 04:55:00	226.562
2017-04-15 11:59:58	0.031084	2017-04-03 10:00:00	20736	2017-04-02 05:00:00	226.563
2017-04-15 12:59:58	0.084708	2017-04-03 10:10:00	20480	2017-04-02 05:05:00	226.562
2017-04-15 13:59:58	0.125119	2017-04-03 10:20:00	19840	2017-04-02 05:10:00	226.564
2017-04-15 14:59:58	0.144226	2017-04-03 10:30:00	20736	2017-04-02 05:15:00	226.564
2017-04-15 15:59:58	0.138468	2017-04-03 10:40:00	22144	2017-04-02 05:20:00	226.564
2017-04-15 16:59:58	0.109539	2017-04-03 10:50:00	21248	2017-04-02 05:25:00	226.563
2017-04-15 17:59:58	0.063855	2017-04-03 11:00:00	20480	2017-04-02 05:30:00	226.563
2017-04-15 18:59:58	0.010926	2017-04-03 11:10:00	20096	2017-04-02 05:35:00	226.563
2017-04-15 19:59:58	-0.03894	2017-04-03 11:20:00	22272	2017-04-02 05:40:00	226.565
2017-04-15 20:59:58	-0.077028	2017-04-03 11:30:00	21376	2017-04-02 05:45:00	226.563
2017-04-15 21:59:58	-0.098118	2017-04-03 11:40:00	20608	2017-04-02 05:50:00	226.563
2017-04-15 22:59:58	-0.101474	2017-04-03 11:50:00	20992	2017-04-02 05:55:00	226.565
2017-04-15 23:59:58	-0.090688	2017-04-03 12:00:00	21248	2017-04-02 06:00:00	226.565
2017-04-16 00:59:58	-0.072448	2017-04-03 12:10:00	19712	2017-04-02 06:05:00	226.567
2017-04-16 01:59:58	-0.054574	2017-04-03 12:20:00	20736	2017-04-02 06:10:00	226.566
2017-04-16 02:59:58	-0.043821	2017-04-03 12:30:00	20352	2017-04-02 06:15:00	226.566
2017-04-16 03:59:58	-0.044028	2017-04-03 12:40:00	19968	2017-04-02 06:20:00	226.563
2017-04-16 04:59:58	-0.055094	2017-04-03 12:50:00	21760	2017-04-02 06:25:00	226.565
2017-04-16 05:59:58	-0.073045	2017-04-03 13:00:00	20224	2017-04-02 06:30:00	226.563
2017-04-16 06:59:58	-0.091177	2017-04-03 13:10:00	20224	2017-04-02 06:35:00	226.566
2017-04-16 07:59:58	-0.101948	2017-04-03 13:20:00	22016	2017-04-02 06:40:00	226.567
2017-04-16 08:59:58	-0.099124	2017-04-03 13:30:00	20736	2017-04-02 06:45:00	226.565
2017-04-16 09:59:58	-0.079582	2017-04-03 13:40:00	20352	2017-04-02 06:50:00	226.565
2017-04-16 10:59:58	-0.044304	2017-04-03 13:50:00	20480	2017-04-02 06:55:00	226.563
2017-04-16 11:59:58	0.001702	2017-04-03 14:00:00	20736	2017-04-02 07:00:00	226.566
2017-04-16 12:59:58	0.050513	2017-04-03 14:10:00	19328	2017-04-02 07:05:00	226.566
2017-04-16 13:59:58	0.093134	2017-04-03 14:20:00	20224	2017-04-02 07:10:00	226.565
2017-04-16 14:59:58	0.121578	2017-04-03 14:30:00	20096	2017-04-02 07:15:00	226.565
2017-04-16 15:59:58	0.130674	2017-04-03 14:40:00	20352	2017-04-02 07:20:00	226.565
2017-04-16 16:59:58	0.11916	2017-04-03 14:50:00	21632	2017-04-02 07:25:00	226.565
2017-04-16 17:59:58	0.089836	2017-04-03 15:00:00	20864	2017-04-02 07:30:00	226.565
2017-04-16 18:59:58	0.048782	2017-04-03 15:10:00	20480	2017-04-02 07:35:00	226.566
2017-04-16 19:59:58	0.003873	2017-04-03 15:20:00	20352	2017-04-02 07:40:00	226.565
2017-04-16 20:59:58	-0.037035	2017-04-03 15:30:00	20352	2017-04-02 07:45:00	226.568
2017-04-16 21:59:58	-0.06781	2017-04-03 15:40:00	19840	2017-04-02 07:50:00	226.567
2017-04-16 22:59:58	-0.085247	2017-04-03 15:50:00	21632	2017-04-02 07:55:00	226.566
2017-04-16 23:59:58	-0.089526	2017-04-03 16:00:00	20608	2017-04-02 08:00:00	226.567
2017-04-17 00:59:58	-0.083829	2017-04-03 16:10:00	20352	2017-04-02 08:05:00	226.564
2017-04-17 01:59:58	-0.073248	2017-04-03 16:20:00	21120	2017-04-02 08:10:00	226.567
2017-04-17 02:59:58	-0.063278	2017-04-03 16:30:00	20864	2017-04-02 08:15:00	226.564
2017-04-17 03:59:58	-0.058266	2017-04-03 16:40:00	20480	2017-04-02 08:20:00	226.569
2017-04-17 04:59:58	-0.060227	2017-04-03 16:50:00	20608	2017-04-02 08:25:00	226.568
2017-04-17 05:59:58	-0.068324	2017-04-03 17:00:00	22272	2017-04-02 08:30:00	226.567
2017-04-17 06:59:58	-0.079145	2017-04-03 17:10:00	22272	2017-04-02 08:35:00	226.564
2017-04-17 07:59:58	-0.087702	2017-04-03 17:20:00	21248	2017-04-02 08:40:00	226.568
2017-04-17 08:59:58	-0.088867	2017-04-03 17:30:00	20480	2017-04-02 08:45:00	226.567
2017-04-17 09:59:58	-0.078872	2017-04-03 17:40:00	20096	2017-04-02 08:50:00	226.568
2017-04-17 10:59:58	-0.056456	2017-04-03 17:50:00	21504	2017-04-02 08:55:00	226.568
2017-04-17 11:59:58	-0.023361	2017-04-03 18:00:00	20224	2017-04-02 09:00:00	226.568
2017-04-17 12:59:58	0.015939	2017-04-03 18:10:00	21760	2017-04-02 09:05:00	226.566
2017-04-17 13:59:58	0.055198	2017-04-03 18:20:00	21120	2017-04-02 09:10:00	226.566
2017-04-17 14:59:58	0.08778	2017-04-03 18:30:00	19840	2017-04-02 09:15:00	226.567
2017-04-17 15:59:58	0.108108	2017-04-03 18:40:00	22144	2017-04-02 09:20:00	226.569
2017-04-17 16:59:57	0.112836	2017-04-03 18:50:00	21632	2017-04-02 09:25:00	226.567
2017-04-17 17:59:57	0.101478	2017-04-03 19:00:00	22400	2017-04-02 09:30:00	226.567
2017-04-17 18:59:57	0.076392	2017-04-03 19:10:00	20224	2017-04-02 09:35:00	226.568
2017-04-17 19:59:57	0.042168	2017-04-03 19:20:00	21120	2017-04-02 09:40:00	226.565
2017-04-17 20:59:57	0.004583	2017-04-03 19:30:00	21120	2017-04-02 09:45:00	226.568
2017-04-17 21:59:57	-0.030613	2017-04-03 19:40:00	21504	2017-04-02 09:50:00	226.57
2017-04-17 22:59:57	-0.058818	2017-04-03 19:50:00	20864	2017-04-02 09:55:00	226.566
2017-04-17 23:59:57	-0.077383	2017-04-03 20:00:00	21888	2017-04-02 10:00:00	226.568
2017-04-18 00:59:57	-0.085934	2017-04-03 20:10:00	20864	2017-04-02 10:05:00	226.569
2017-04-18 01:59:57	-0.086176	2017-04-03 20:20:00	21888	2017-04-02 10:10:00	226.57
2017-04-18 02:59:57	-0.081239	2017-04-03 20:30:00	22528	2017-04-02 10:15:00	226.569
2017-04-18 03:59:57	-0.074727	2017-04-03 20:40:00	20608	2017-04-02 10:20:00	226.567
2017-04-18 04:59:57	-0.069714	2017-04-03 20:50:00	21888	2017-04-02 10:25:00	226.566
2017-04-18 05:59:57	-0.067919	2017-04-03 21:00:00	20736	2017-04-02 10:30:00	226.569
2017-04-18 06:59:57	-0.069284	2017-04-03 21:10:00	22016	2017-04-02 10:35:00	226.567
2017-04-18 07:59:57	-0.072051	2017-04-03 21:20:00	21376	2017-04-02 10:40:00	226.57
2017-04-18 08:59:57	-0.073314	2017-04-03 21:30:00	20608	2017-04-02 10:45:00	226.569
2017-04-18 09:59:57	-0.069899	2017-04-03 21:40:00	21760	2017-04-02 10:50:00	226.566
2017-04-18 10:59:57	-0.05933	2017-04-03 21:50:00	22912	2017-04-02 10:55:00	226.566
2017-04-18 11:59:57	-0.040621	2017-04-03 22:00:00	21376	2017-04-02 11:00:00	226.568
2017-04-18 12:59:57	-0.014694	2017-04-03 22:10:00	19840	2017-04-02 11:05:00	226.566
2017-04-18 13:59:57	0.015679	2017-04-03 22:20:00	23168	2017-04-02 11:10:00	226.568
2017-04-18 14:59:57	0.046377	2017-04-03 22:30:00	20992	2017-04-02 11:15:00	226.567
2017-04-18 15:59:57	0.072745	2017-04-03 22:40:00	21888	2017-04-02 11:20:00	226.57
2017-04-18 16:59:57	0.090518	2017-04-03 22:50:00	21376	2017-04-02 11:25:00	226.569
2017-04-18 17:59:57	0.096656	2017-04-03 23:00:00	20608	2017-04-02 11:30:00	226.566
2017-04-18 18:59:57	0.089921	2017-04-03 23:10:00	21760	2017-04-02 11:35:00	226.567
2017-04-18 19:59:57	0.071099	2017-04-03 23:20:00	20608	2017-04-02 11:40:00	226.571
2017-04-18 20:59:57	0.042853	2017-04-03 23:30:00	22144	2017-04-02 11:45:00	226.568
2017-04-18 21:59:57	0.009238	2017-04-03 23:40:00	20736	2017-04-02 11:50:00	226.569
2017-04-18 22:59:57	-0.025033	2017-04-03 23:50:00	22016	2017-04-02 11:55:00	226.57
2017-04-18 23:59:57	-0.055423	2017-04-04	20096	2017-04-02 12:00:00	226.569
2017-04-19 00:59:57	-0.07837	2017-04-04 00:10:00	21504	2017-04-02 12:05:00	226.57
2017-04-19 01:59:57	-0.091896	2017-04-04 00:20:00	20864	2017-04-02 12:10:00	226.57
2017-04-19 02:59:57	-0.095885	2017-04-04 00:30:00	21504	2017-04-02 12:15:00	226.571
2017-04-19 03:59:57	-0.091964	2017-04-04 00:40:00	22272	2017-04-02 12:20:00	226.567
2017-04-19 04:59:57	-0.083009	2017-04-04 00:50:00	20480	2017-04-02 12:25:00	226.571
2017-04-19 05:59:57	-0.072361	2017-04-04 01:00:00	21632	2017-04-02 12:30:00	226.569
2017-04-19 06:59:57	-0.06297	2017-04-04 01:10:00	20096	2017-04-02 12:35:00	226.57
2017-04-19 07:59:57	-0.056644	2017-04-04 01:20:00	21504	2017-04-02 12:40:00	226.569
2017-04-19 08:59:57	-0.053638	2017-04-04 01:30:00	23168	2017-04-02 12:45:00	226.569
2017-04-19 09:59:57	-0.052659	2017-04-04 01:40:00	20608	2017-04-02 12:50:00	226.568
2017-04-19 10:59:57	-0.0513	2017-04-04 01:50:00	20736	2017-04-02 12:55:00	226.571
2017-04-19 11:59:57	-0.046783	2017-04-04 02:00:00	20992	2017-04-02 13:00:00	226.571
2017-04-19 12:59:57	-0.036814	2017-04-04 02:10:00	20992	2017-04-02 13:05:00	226.57
2017-04-19 13:59:57	-0.02033	2017-04-04 02:20:00	20352	2017-04-02 13:10:00	226.571
2017-04-19 14:59:57	0.00204	2017-04-04 02:30:00	21376	2017-04-02 13:15:00	226.571
2017-04-19 15:59:57	0.027913	2017-04-04 02:40:00	21376	2017-04-02 13:20:00	226.572
2017-04-19 16:59:57	0.053515	2017-04-04 02:50:00	20224	2017-04-02 13:25:00	226.567
2017-04-19 17:59:57	0.074377	2017-04-04 03:00:00	20352	2017-04-02 13:30:00	226.572
2017-04-19 18:59:57	0.086244	2017-04-04 03:10:00	20864	2017-04-02 13:35:00	226.573
2017-04-19 19:59:57	0.086007	2017-04-04 03:20:00	20864	2017-04-02 13:40:00	226.572
2017-04-19 20:59:57	0.072468	2017-04-04 03:30:00	21504	2017-04-02 13:45:00	226.57
2017-04-19 21:59:57	0.046756	2017-04-04 03:40:00	20480	2017-04-02 13:50:00	226.572
2017-04-19 22:59:57	0.012286	2017-04-04 03:50:00	22784	2017-04-02 13:55:00	226.568
2017-04-19 23:59:57	-0.025781	2017-04-04 04:00:00	19712	2017-04-02 14:00:00	226.572
2017-04-20 00:59:57	-0.061501	2017-04-04 04:10:00	20608	2017-04-02 14:05:00	226.571
2017-04-20 01:59:57	-0.089357	2017-04-04 04:20:00	21120	2017-04-02 14:10:00	226.572
2017-04-20 02:59:57	-0.105435	2017-04-04 04:30:00	20864	2017-04-02 14:15:00	226.57
2017-04-20 03:59:57	-0.108282	2017-04-04 04:40:00	21888	2017-04-02 14:20:00	226.571
2017-04-20 04:59:57	-0.099209	2017-04-04 04:50:00	20992	2017-04-02 14:25:00	226.569
2017-04-20 05:59:57	-0.081932	2017-04-04 05:00:00	22016	2017-04-02 14:30:00	226.572
2017-04-20 06:59:57	-0.061613	2017-04-04 05:10:00	20352	2017-04-02 14:35:00	226.571
2017-04-20 07:59:57	-0.043532	2017-04-04 05:20:00	19584	2017-04-02 14:40:00	226.572
2017-04-20 08:59:57	-0.031735	2017-04-04 05:30:00	21760	2017-04-02 14:45:00	226.573
2017-04-20 09:59:57	-0.028017	2017-04-04 05:40:00	21632	2017-04-02 14:50:00	226.571
2017-04-20 10:59:57	-0.031503	2017-04-04 05:50:00	20480	2017-04-02 14:55:00	226.572
2017-04-20 11:59:57	-0.038949	2017-04-04 06:00:00	21632	2017-04-02 15:00:00	226.573
2017-04-20 12:59:57	-0.045679	2017-04-04 06:10:00	21120	2017-04-02 15:05:00	226.572
2017-04-20 13:59:57	-0.046915	2017-04-04 06:20:00	21120	2017-04-02 15:10:00	226.574
2017-04-20 14:59:57	-0.039156	2017-04-04 06:30:00	20992	2017-04-02 15:15:00	226.57
2017-04-20 15:59:57	-0.021268	2017-04-04 06:40:00	21760	2017-04-02 15:20:00	226.573
2017-04-20 16:59:57	0.005016	2017-04-04 06:50:00	22144	2017-04-02 15:25:00	226.57
2017-04-20 17:59:57	0.035291	2017-04-04 07:00:00	21248	2017-04-02 15:30:00	226.574
2017-04-20 18:59:57	0.063373	2017-04-04 07:10:00	20736	2017-04-02 15:35:00	226.569
2017-04-20 19:59:57	0.082689	2017-04-04 07:20:00	21632	2017-04-02 15:40:00	226.572
2017-04-20 20:59:57	0.087857	2017-04-04 07:30:00	21248	2017-04-02 15:45:00	226.57
2017-04-20 21:59:57	0.076093	2017-04-04 07:40:00	21504	2017-04-02 15:50:00	226.572
2017-04-20 22:59:57	0.048088	2017-04-04 07:50:00	20352	2017-04-02 15:55:00	226.573
2017-04-20 23:59:57	0.008111	2017-04-04 08:00:00	21504	2017-04-02 16:00:00	226.572
2017-04-21 00:59:57	-0.036762	2017-04-04 08:10:00	20736	2017-04-02 16:05:00	226.572
2017-04-21 01:59:57	-0.07814	2017-04-04 08:20:00	20864	2017-04-02 16:10:00	226.575
2017-04-21 02:59:57	-0.108225	2017-04-04 08:30:00	21760	2017-04-02 16:15:00	226.571
2017-04-21 03:59:57	-0.121667	2017-04-04 08:40:00	21120	2017-04-02 16:20:00	226.573
2017-04-21 04:59:57	-0.116882	2017-04-04 08:50:00	21632	2017-04-02 16:25:00	226.572
2017-04-21 05:59:57	-0.096462	2017-04-04 09:00:00	20224	2017-04-02 16:30:00	226.572
2017-04-21 06:59:57	-0.066535	2017-04-04 09:10:00	21632	2017-04-02 16:35:00	226.571
2017-04-21 07:59:57	-0.03521	2017-04-04 09:20:00	21376	2017-04-02 16:40:00	226.573
2017-04-21 08:59:57	-0.010486	2017-04-04 09:30:00	22656	2017-04-02 16:45:00	226.573
2017-04-21 09:59:57	0.001811	2017-04-04 09:40:00	21248	2017-04-02 16:50:00	226.573
2017-04-21 10:59:57	-0.000466	2017-04-04 09:50:00	22912	2017-04-02 16:55:00	226.574
2017-04-21 11:59:57	-0.015255	2017-04-04 10:00:00	20352	2017-04-02 17:00:00	226.572
2017-04-21 12:59:57	-0.036874	2017-04-04 10:10:00	21632	2017-04-02 17:05:00	226.576
2017-04-21 13:59:57	-0.057564	2017-04-04 10:20:00	20480	2017-04-02 17:10:00	226.573
2017-04-21 14:59:57	-0.069593	2017-04-04 10:30:00	22016	2017-04-02 17:15:00	226.572
2017-04-21 15:59:57	-0.067383	2017-04-04 10:40:00	21632	2017-04-02 17:20:00	226.573
2017-04-21 16:59:57	-0.049101	2017-04-04 10:50:00	21376	2017-04-02 17:25:00	226.572
2017-04-21 17:59:57	-0.017315	2017-04-04 11:00:00	21248	2017-04-02 17:30:00	226.573
2017-04-21 18:59:57	0.02146	2017-04-04 11:10:00	20224	2017-04-02 17:35:00	226.571
2017-04-21 19:59:57	0.058245	2017-04-04 11:20:00	21120	2017-04-02 17:40:00	226.569
2017-04-21 20:59:57	0.08376	2017-04-04 11:30:00	21888	2017-04-02 17:45:00	226.573
2017-04-21 21:59:57	0.090763	2017-04-04 11:40:00	23040	2017-04-02 17:50:00	226.572
2017-04-21 22:59:57	0.075981	2017-04-04 11:50:00	21888	2017-04-02 17:55:00	226.573
2017-04-21 23:59:57	0.041149	2017-04-04 12:00:00	22016	2017-04-02 18:00:00	226.571
2017-04-22 00:59:57	-0.007161	2017-04-04 12:10:00	21504	2017-04-02 18:05:00	226.573
2017-04-22 01:59:57	-0.05893	2017-04-04 12:20:00	21632	2017-04-02 18:10:00	226.572
2017-04-22 02:59:57	-0.103014	2017-04-04 12:30:00	21376	2017-04-02 18:15:00	226.573
2017-04-22 03:59:57	-0.129854	2017-04-04 12:40:00	21376	2017-04-02 18:20:00	226.574
2017-04-22 04:59:57	-0.133879	2017-04-04 12:50:00	20096	2017-04-02 18:25:00	226.573
2017-04-22 05:59:57	-0.11498	2017-04-04 13:00:00	21760	2017-04-02 18:30:00	226.574
2017-04-22 06:59:57	-0.078603	2017-04-04 13:10:00	20992	2017-04-02 18:35:00	226.572
2017-04-22 07:59:57	-0.034427	2017-04-04 13:20:00	20992	2017-04-02 18:40:00	226.571
2017-04-22 08:59:57	0.006099	2017-04-04 13:30:00	20864	2017-04-02 18:45:00	226.572
2017-04-22 09:59:57	0.032701	2017-04-04 13:40:00	21376	2017-04-02 18:50:00	226.573
2017-04-22 10:59:57	0.038946	2017-04-04 13:50:00	23040	2017-04-02 18:55:00	226.572
2017-04-22 11:59:57	0.023917	2017-04-04 14:00:00	21376	2017-04-02 19:00:00	226.571
2017-04-22 12:59:57	-0.007559	2017-04-04 14:10:00	20736	2017-04-02 19:05:00	226.572
2017-04-22 13:59:57	-0.046192	2017-04-04 14:20:00	22528	2017-04-02 19:10:00	226.573
2017-04-22 14:59:57	-0.080675	2017-04-04 14:30:00	21248	2017-04-02 19:15:00	226.573
2017-04-22 15:59:57	-0.100674	2017-04-04 14:40:00	20224	2017-04-02 19:20:00	226.576
2017-04-22 16:59:57	-0.099575	2017-04-04 14:50:00	21120	2017-04-02 19:25:00	226.574
2017-04-22 17:59:57	-0.076285	2017-04-04 15:00:00	21760	2017-04-02 19:30:00	226.573
2017-04-22 18:59:57	-0.035636	2017-04-04 15:10:00	21120	2017-04-02 19:35:00	226.571
2017-04-22 19:59:57	0.01272	2017-04-04 15:20:00	20736	2017-04-02 19:40:00	226.572
2017-04-22 20:59:57	0.056669	2017-04-04 15:30:00	21632	2017-04-02 19:45:00	226.577
2017-04-22 21:59:57	0.084668	2017-04-04 15:40:00	21760	2017-04-02 19:50:00	226.575
2017-04-22 22:59:57	0.088718	2017-04-04 15:50:00	20608	2017-04-02 19:55:00	226.575
2017-04-22 23:59:57	0.066519	2017-04-04 16:00:00	20864	2017-04-02 20:00:00	226.571
2017-04-23 00:59:57	0.022266	2017-04-04 16:10:00	21504	2017-04-02 20:05:00	226.574
2017-04-23 01:59:57	-0.034187	2017-04-04 16:20:00	20608	2017-04-02 20:10:00	226.573
2017-04-23 02:59:57	-0.089622	2017-04-04 16:30:00	21248	2017-04-02 20:15:00	226.572
2017-04-23 03:59:57	-0.130697	2017-04-04 16:40:00	21120	2017-04-02 20:20:00	226.572
2017-04-23 04:59:57	-0.147323	2017-04-04 16:50:00	22016	2017-04-02 20:25:00	226.575
2017-04-23 05:59:57	-0.135312	2017-04-04 17:00:00	21248	2017-04-02 20:30:00	226.572
2017-04-23 06:59:57	-0.097582	2017-04-04 17:10:00	19712	2017-04-02 20:35:00	226.573
2017-04-23 07:59:57	-0.043539	2017-04-04 17:20:00	20096	2017-04-02 20:40:00	226.572
2017-04-23 08:59:57	0.013228	2017-04-04 17:30:00	20992	2017-04-02 20:45:00	226.573
2017-04-23 09:59:57	0.058395	2017-04-04 17:40:00	19840	2017-04-02 20:50:00	226.571
2017-04-23 10:59:57	0.080584	2017-04-04 17:50:00	19200	2017-04-02 20:55:00	226.573
2017-04-23 11:59:57	0.074313	2017-04-04 18:00:00	20736	2017-04-02 21:00:00	226.572
2017-04-23 12:59:57	0.041429	2017-04-04 18:10:00	21760	2017-04-02 21:05:00	226.572
2017-04-23 13:59:57	-0.009364	2017-04-04 18:20:00	20608	2017-04-02 21:10:00	226.576
2017-04-23 14:59:57	-0.064763	2017-04-04 18:30:00	20864	2017-04-02 21:15:00	226.574
2017-04-23 15:59:57	-0.110304	2017-04-04 18:40:00	20096	2017-04-02 21:20:00	226.573
2017-04-23 16:59:57	-0.134104	2017-04-04 18:50:00	21248	2017-04-02 21:25:00	226.575
2017-04-23 17:59:57	-0.129922	2017-04-04 19:00:00	20992	2017-04-02 21:30:00	226.575
2017-04-23 18:59:57	-0.098779	2017-04-04 19:10:00	20736	2017-04-02 21:35:00	226.573
2017-04-23 19:59:57	-0.048717	2017-04-04 19:20:00	21504	2017-04-02 21:40:00	226.576
2017-04-23 20:59:57	0.007221	2017-04-04 19:30:00	21760	2017-04-02 21:45:00	226.573
2017-04-23 21:59:57	0.0543	2017-04-04 19:40:00	20608	2017-04-02 21:50:00	226.575
2017-04-23 22:59:57	0.079859	2017-04-04 19:50:00	21504	2017-04-02 21:55:00	226.573
2017-04-23 23:59:57	0.076601	2017-04-04 20:00:00	21888	2017-04-02 22:00:00	226.577
2017-04-24 00:59:57	0.044581	2017-04-04 20:10:00	20992	2017-04-02 22:05:00	226.576
2017-04-24 01:59:57	-0.00864	2017-04-04 20:20:00	21120	2017-04-02 22:10:00	226.573
2017-04-24 02:59:57	-0.06975	2017-04-04 20:30:00	21888	2017-04-02 22:15:00	226.575
2017-04-24 03:59:57	-0.122962	2017-04-04 20:40:00	21120	2017-04-02 22:20:00	226.574
2017-04-24 04:59:57	-0.154015	2017-04-04 20:50:00	21888	2017-04-02 22:25:00	226.577
2017-04-24 05:59:57	-0.153904	2017-04-04 21:00:00	22272	2017-04-02 22:30:00	226.573
2017-04-24 06:59:57	-0.121344	2017-04-04 21:10:00	21376	2017-04-02 22:35:00	226.575
2017-04-24 07:59:57	-0.063313	2017-04-04 21:20:00	22016	2017-04-02 22:40:00	226.573
2017-04-24 08:59:57	0.006548	2017-04-04 21:30:00	21632	2017-04-02 22:45:00	226.573
2017-04-24 09:59:57	0.071293	2017-04-04 21:40:00	21376	2017-04-02 22:50:00	226.575
2017-04-24 10:59:57	0.11495	2017-04-04 21:50:00	21632	2017-04-02 22:55:00	226.575
2017-04-24 11:59:57	0.126611	2017-04-04 22:00:00	23936	2017-04-02 23:00:00	226.573
2017-04-24 12:59:57	0.103243	2017-04-04 22:10:00	22784	2017-04-02 23:05:00	226.575
2017-04-24 13:59:57	0.050489	2017-04-04 22:20:00	22656	2017-04-02 23:10:00	226.574
2017-04-24 14:59:57	-0.018775	2017-04-04 22:30:00	21376	2017-04-02 23:15:00	226.575
2017-04-24 15:59:57	-0.087729	2017-04-04 22:40:00	19840	2017-04-02 23:20:00	226.577
2017-04-24 16:59:57	-0.139892	2017-04-04 22:50:00	23040	2017-04-02 23:25:00	226.577
2017-04-24 17:59:57	-0.163284	2017-04-04 23:00:00	20992	2017-04-02 23:30:00	226.575
2017-04-24 18:59:57	-0.153399	2017-04-04 23:10:00	21504	2017-04-02 23:35:00	226.577
2017-04-24 19:59:57	-0.114253	2017-04-04 23:20:00	23808	2017-04-02 23:40:00	226.574
2017-04-24 20:59:57	-0.057256	2017-04-04 23:30:00	22784	2017-04-02 23:45:00	226.577
2017-04-24 21:59:57	0.001778	2017-04-04 23:40:00	21120	2017-04-02 23:50:00	226.572
2017-04-24 22:59:57	0.046723	2017-04-04 23:50:00	20352	2017-04-02 23:55:00	226.574
2017-04-24 23:59:57	0.065312	2017-04-05	20992	2017-04-03	226.575
2017-04-25 00:59:57	0.052329	2017-04-05 00:10:00	22144	2017-04-03 00:05:00	226.573
2017-04-25 01:59:57	0.01104	2017-04-05 00:20:00	20608	2017-04-03 00:10:00	226.577
2017-04-25 02:59:57	-0.047539	2017-04-05 00:30:00	22016	2017-04-03 00:15:00	226.576
2017-04-25 03:59:57	-0.107365	2017-04-05 00:40:00	20480	2017-04-03 00:20:00	226.575
2017-04-25 04:59:57	-0.151449	2017-04-05 00:50:00	21248	2017-04-03 00:25:00	226.573
2017-04-25 05:59:57	-0.166273	2017-04-05 01:00:00	21632	2017-04-03 00:30:00	226.574
2017-04-25 06:59:57	-0.145423	2017-04-05 01:10:00	20224	2017-04-03 00:35:00	226.575
2017-04-25 07:59:57	-0.091487	2017-04-05 01:20:00	20608	2017-04-03 00:40:00	226.577
2017-04-25 08:59:57	-0.015664	2017-04-05 01:30:00	22016	2017-04-03 00:45:00	226.576
2017-04-25 09:59:57	0.064861	2017-04-05 01:40:00	21504	2017-04-03 00:50:00	226.575
2017-04-25 10:59:57	0.13114	2017-04-05 01:50:00	21888	2017-04-03 00:55:00	226.578
2017-04-25 11:59:57	0.167222	2017-04-05 02:00:00	21632	2017-04-03 01:00:00	226.578
2017-04-25 12:59:57	0.164196	2017-04-05 02:10:00	21376	2017-04-03 01:05:00	226.576
2017-04-25 13:59:57	0.12247	2017-04-05 02:20:00	21760	2017-04-03 01:10:00	226.576
2017-04-25 14:59:57	0.051674	2017-04-05 02:30:00	21888	2017-04-03 01:15:00	226.577
2017-04-25 15:59:57	-0.031787	2017-04-05 02:40:00	20992	2017-04-03 01:20:00	226.577
2017-04-25 16:59:57	-0.108872	2017-04-05 02:50:00	20992	2017-04-03 01:25:00	226.577
2017-04-25 17:59:57	-0.162668	2017-04-05 03:00:00	20736	2017-04-03 01:30:00	226.579
2017-04-25 18:59:57	-0.182542	2017-04-05 03:10:00	20480	2017-04-03 01:35:00	226.576
2017-04-25 19:59:57	-0.166627	2017-04-05 03:20:00	21504	2017-04-03 01:40:00	226.578
2017-04-25 20:59:57	-0.122053	2017-04-05 03:30:00	20096	2017-04-03 01:45:00	226.577
2017-04-25 21:59:57	-0.062893	2017-04-05 03:40:00	20608	2017-04-03 01:50:00	226.579
2017-04-25 22:59:57	-0.006402	2017-04-05 03:50:00	20352	2017-04-03 01:55:00	226.577
2017-04-25 23:59:57	0.031512	2017-04-05 04:00:00	21888	2017-04-03 02:00:00	226.578
2017-04-26 00:59:56	0.040411	2017-04-05 04:10:00	20352	2017-04-03 02:05:00	226.578
2017-04-26 01:59:56	0.018036	2017-04-05 04:20:00	20864	2017-04-03 02:10:00	226.576
2017-04-26 02:59:56	-0.029083	2017-04-05 04:30:00	20992	2017-04-03 02:15:00	226.577
2017-04-26 03:59:56	-0.087267	2017-04-05 04:40:00	21888	2017-04-03 02:20:00	226.576
2017-04-26 04:59:56	-0.139192	2017-04-05 04:50:00	21760	2017-04-03 02:25:00	226.579
2017-04-26 05:59:56	-0.168395	2017-04-05 05:00:00	20608	2017-04-03 02:30:00	226.577
2017-04-26 06:59:56	-0.163648	2017-04-05 05:10:00	20352	2017-04-03 02:35:00	226.58
2017-04-26 07:59:56	-0.122083	2017-04-05 05:20:00	20736	2017-04-03 02:40:00	226.578
2017-04-26 08:59:56	-0.05025	2017-04-05 05:30:00	23168	2017-04-03 02:45:00	226.58
2017-04-26 09:59:56	0.037243	2017-04-05 05:40:00	21120	2017-04-03 02:50:00	226.579
2017-04-26 10:59:56	0.121169	2017-04-05 05:50:00	21376	2017-04-03 02:55:00	226.576
2017-04-26 11:59:56	0.182395	2017-04-05 06:00:00	20224	2017-04-03 03:00:00	226.579
2017-04-26 12:59:56	0.20663	2017-04-05 06:10:00	21504	2017-04-03 03:05:00	226.578
2017-04-26 13:59:56	0.18801	2017-04-05 06:20:00	21632	2017-04-03 03:10:00	226.577
2017-04-26 14:59:56	0.130556	2017-04-05 06:30:00	21248	2017-04-03 03:15:00	226.576
2017-04-26 15:59:56	0.047151	2017-04-05 06:40:00	21120	2017-04-03 03:20:00	226.579
2017-04-26 16:59:56	-0.043706	2017-04-05 06:50:00	21888	2017-04-03 03:25:00	226.579
2017-04-26 17:59:56	-0.122517	2017-04-05 07:00:00	20352	2017-04-03 03:30:00	226.581
2017-04-26 18:59:56	-0.173547	2017-04-05 07:10:00	22144	2017-04-03 03:35:00	226.579
2017-04-26 19:59:56	-0.188546	2017-04-05 07:20:00	20096	2017-04-03 03:40:00	226.577
2017-04-26 20:59:56	-0.168485	2017-04-05 07:30:00	22400	2017-04-03 03:45:00	226.579
2017-04-26 21:59:56	-0.122924	2017-04-05 07:40:00	21248	2017-04-03 03:50:00	226.579
2017-04-26 22:59:56	-0.067236	2017-04-05 07:50:00	20224	2017-04-03 03:55:00	226.579
2017-04-26 23:59:56	-0.018433	2017-04-05 08:00:00	21120	2017-04-03 04:00:00	226.58
2017-04-27 00:59:56	0.009317	2017-04-05 08:10:00	21248	2017-04-03 04:05:00	226.576
2017-04-27 01:59:56	0.008366	2017-04-05 08:20:00	21760	2017-04-03 04:10:00	226.576
2017-04-27 02:59:56	-0.020475	2017-04-05 08:30:00	21632	2017-04-03 04:15:00	226.576
2017-04-27 03:59:56	-0.068171	2017-04-05 08:40:00	19968	2017-04-03 04:20:00	226.579
2017-04-27 04:59:56	-0.119837	2017-04-05 08:50:00	21120	2017-04-03 04:25:00	226.578
2017-04-27 05:59:56	-0.15863	2017-04-05 09:00:00	20736	2017-04-03 04:30:00	226.579
2017-04-27 06:59:56	-0.170209	2017-04-05 09:10:00	19840	2017-04-03 04:35:00	226.58
2017-04-27 07:59:56	-0.146626	2017-04-05 09:20:00	20864	2017-04-03 04:40:00	226.579
2017-04-27 08:59:56	-0.08867	2017-04-05 09:30:00	22656	2017-04-03 04:45:00	226.58
2017-04-27 09:59:56	-0.006016	2017-04-05 09:40:00	21632	2017-04-03 04:50:00	226.58
2017-04-27 10:59:56	0.084888	2017-04-05 09:50:00	20096	2017-04-03 04:55:00	226.58
2017-04-27 11:59:56	0.164698	2017-04-05 10:00:00	19968	2017-04-03 05:00:00	226.581
2017-04-27 12:59:56	0.215866	2017-04-05 10:10:00	21504	2017-04-03 05:05:00	226.577
2017-04-27 13:59:56	0.226938	2017-04-05 10:20:00	20224	2017-04-03 05:10:00	226.581
2017-04-27 14:59:56	0.195367	2017-04-05 10:30:00	21632	2017-04-03 05:15:00	226.581
2017-04-27 15:59:56	0.128103	2017-04-05 10:40:00	20864	2017-04-03 05:20:00	226.58
2017-04-27 16:59:56	0.03982	2017-04-05 10:50:00	21760	2017-04-03 05:25:00	226.58
2017-04-27 17:59:56	-0.050744	2017-04-05 11:00:00	23168	2017-04-03 05:30:00	226.581
2017-04-27 18:59:56	-0.125382	2017-04-05 11:10:00	21504	2017-04-03 05:35:00	226.58
2017-04-27 19:59:56	-0.170754	2017-04-05 11:20:00	22400	2017-04-03 05:40:00	226.58
2017-04-27 20:59:56	-0.181369	2017-04-05 11:30:00	23424	2017-04-03 05:45:00	226.579
2017-04-27 21:59:56	-0.1605	2017-04-05 11:40:00	21376	2017-04-03 05:50:00	226.581
2017-04-27 22:59:56	-0.118867	2017-04-05 11:50:00	22016	2017-04-03 05:55:00	226.583
2017-04-27 23:59:56	-0.071497	2017-04-05 12:00:00	21632	2017-04-03 06:00:00	226.58
2017-04-28 00:59:56	-0.033606	2017-04-05 12:10:00	23040	2017-04-03 06:05:00	226.581
2017-04-28 01:59:56	-0.016581	2017-04-05 12:20:00	20992	2017-04-03 06:10:00	226.58
2017-04-28 02:59:56	-0.025049	2017-04-05 12:30:00	20992	2017-04-03 06:15:00	226.58
2017-04-28 03:59:56	-0.055768	2017-04-05 12:40:00	22656	2017-04-03 06:20:00	226.581
2017-04-28 04:59:56	-0.098552	2017-04-05 12:50:00	20608	2017-04-03 06:25:00	226.58
2017-04-28 05:59:56	-0.139004	2017-04-05 13:00:00	21760	2017-04-03 06:30:00	226.579
2017-04-28 06:59:56	-0.162344	2017-04-05 13:10:00	20864	2017-04-03 06:35:00	226.58
2017-04-28 07:59:56	-0.15738	2017-04-05 13:20:00	20736	2017-04-03 06:40:00	226.578
2017-04-28 08:59:56	-0.119628	2017-04-05 13:30:00	20608	2017-04-03 06:45:00	226.58
2017-04-28 09:59:56	-0.052781	2017-04-05 13:40:00	20864	2017-04-03 06:50:00	226.58
2017-04-28 10:59:56	0.031865	2017-04-05 13:50:00	20864	2017-04-03 06:55:00	226.58
2017-04-28 11:59:56	0.117918	2017-04-05 14:00:00	20992	2017-04-03 07:00:00	226.577
2017-04-28 12:59:56	0.187726	2017-04-05 14:10:00	18944	2017-04-03 07:05:00	226.582
2017-04-28 13:59:56	0.226598	2017-04-05 14:20:00	22272	2017-04-03 07:10:00	226.581
2017-04-28 14:59:56	0.22633	2017-04-05 14:30:00	20992	2017-04-03 07:15:00	226.58
2017-04-28 15:59:56	0.187159	2017-04-05 14:40:00	20224	2017-04-03 07:20:00	226.582
2017-04-28 16:59:56	0.117632	2017-04-05 14:50:00	20096	2017-04-03 07:25:00	226.583
2017-04-28 17:59:56	0.032442	2017-04-05 15:00:00	20224	2017-04-03 07:30:00	226.582
2017-04-28 18:59:56	-0.05119	2017-04-05 15:10:00	19328	2017-04-03 07:35:00	226.579
2017-04-28 19:59:56	-0.117648	2017-04-05 15:20:00	20736	2017-04-03 07:40:00	226.583
2017-04-28 20:59:56	-0.156507	2017-04-05 15:30:00	20608	2017-04-03 07:45:00	226.581
2017-04-28 21:59:56	-0.164691	2017-04-05 15:40:00	21632	2017-04-03 07:50:00	226.584
2017-04-28 22:59:56	-0.146697	2017-04-05 15:50:00	20864	2017-04-03 07:55:00	226.582
2017-04-28 23:59:56	-0.112916	2017-04-05 16:00:00	19456	2017-04-03 08:00:00	226.581
2017-04-29 00:59:56	-0.076566	2017-04-05 16:10:00	20608	2017-04-03 08:05:00	226.585
2017-04-29 01:59:56	-0.050039	2017-04-05 16:20:00	19584	2017-04-03 08:10:00	226.583
2017-04-29 02:59:56	-0.041638	2017-04-05 16:30:00	20224	2017-04-03 08:15:00	226.585
2017-04-29 03:59:56	-0.053488	2017-04-05 16:40:00	20352	2017-04-03 08:20:00	226.582
2017-04-29 04:59:56	-0.081107	2017-04-05 16:50:00	20480	2017-04-03 08:25:00	226.584
2017-04-29 05:59:56	-0.114707	2017-04-05 17:00:00	21248	2017-04-03 08:30:00	226.585
2017-04-29 06:59:56	-0.141859	2017-04-05 17:10:00	20736	2017-04-03 08:35:00	226.584
2017-04-29 07:59:56	-0.150837	2017-04-05 17:20:00	20736	2017-04-03 08:40:00	226.582
2017-04-29 08:59:56	-0.133824	2017-04-05 17:30:00	22528	2017-04-03 08:45:00	226.581
2017-04-29 09:59:56	-0.08916	2017-04-05 17:40:00	21120	2017-04-03 08:50:00	226.582
2017-04-29 10:59:56	-0.022084	2017-04-05 17:50:00	21760	2017-04-03 08:55:00	226.586
2017-04-29 11:59:56	0.056236	2017-04-05 18:00:00	21504	2017-04-03 09:00:00	226.58
2017-04-29 12:59:56	0.131173	2017-04-05 18:10:00	21120	2017-04-03 09:05:00	226.579
2017-04-29 13:59:56	0.188012	2017-04-05 18:20:00	21376	2017-04-03 09:10:00	226.582
2017-04-29 14:59:56	0.21539	2017-04-05 18:30:00	21120	2017-04-03 09:15:00	226.587
2017-04-29 15:59:56	0.207962	2017-04-05 18:40:00	21248	2017-04-03 09:20:00	226.583
2017-04-29 16:59:56	0.167607	2017-04-05 18:50:00	20608	2017-04-03 09:25:00	226.585
2017-04-29 17:59:56	0.10289	2017-04-05 19:00:00	20480	2017-04-03 09:30:00	226.585
2017-04-29 18:59:56	0.026923	2017-04-05 19:10:00	21888	2017-04-03 09:35:00	226.584
2017-04-29 19:59:56	-0.045799	2017-04-05 19:20:00	21120	2017-04-03 09:40:00	226.58
2017-04-29 20:59:56	-0.102783	2017-04-05 19:30:00	22144	2017-04-03 09:45:00	226.583
2017-04-29 21:59:56	-0.136271	2017-04-05 19:40:00	21760	2017-04-03 09:50:00	226.583
2017-04-29 22:59:56	-0.14468	2017-04-05 19:50:00	21376	2017-04-03 09:55:00	226.582
2017-04-29 23:59:56	-0.13243	2017-04-05 20:00:00	20992	2017-04-03 10:00:00	226.585
2017-04-30 00:59:56	-0.108295	2017-04-05 20:10:00	20608	2017-04-03 10:05:00	226.584
2017-04-30 01:59:56	-0.08277	2017-04-05 20:20:00	20480	2017-04-03 10:10:00	226.585
2017-04-30 02:59:56	-0.065171	2017-04-05 20:30:00	20352	2017-04-03 10:15:00	226.581
2017-04-30 03:59:56	-0.061198	2017-04-05 20:40:00	20992	2017-04-03 10:20:00	226.582
2017-04-30 04:59:56	-0.071559	2017-04-05 20:50:00	22400	2017-04-03 10:25:00	226.587
2017-04-30 05:59:56	-0.091947	2017-04-05 21:00:00	21504	2017-04-03 10:30:00	226.587
2017-04-30 06:59:56	-0.114308	2017-04-05 21:10:00	22528	2017-04-03 10:35:00	226.585
2017-04-30 07:59:56	-0.129076	2017-04-05 21:20:00	21120	2017-04-03 10:40:00	226.584
2017-04-30 08:59:56	-0.127772	2017-04-05 21:30:00	22016	2017-04-03 10:45:00	226.584
2017-04-30 09:59:56	-0.105362	2017-04-05 21:40:00	22784	2017-04-03 10:50:00	226.58
2017-04-30 10:59:56	-0.061769	2017-04-05 21:50:00	21888	2017-04-03 10:55:00	226.581
2017-04-30 11:59:56	-0.002194	2017-04-05 22:00:00	22656	2017-04-03 11:00:00	226.582
2017-04-30 12:59:56	0.063866	2017-04-05 22:10:00	19968	2017-04-03 11:05:00	226.584
2017-04-30 13:59:56	0.124659	2017-04-05 22:20:00	21760	2017-04-03 11:10:00	226.585
2017-04-30 14:59:56	0.168819	2017-04-05 22:30:00	21376	2017-04-03 11:15:00	226.584
2017-04-30 15:59:56	0.187949	2017-04-05 22:40:00	21120	2017-04-03 11:20:00	226.584
2017-04-30 16:59:56	0.178531	2017-04-05 22:50:00	21760	2017-04-03 11:25:00	226.583
2017-04-30 17:59:56	0.142686	2017-04-05 23:00:00	22016	2017-04-03 11:30:00	226.584
2017-04-30 18:59:56	0.087603	2017-04-05 23:10:00	20992	2017-04-03 11:35:00	226.585
2017-04-30 19:59:56	0.023791	2017-04-05 23:20:00	21504	2017-04-03 11:40:00	226.583
2017-04-30 20:59:56	-0.03738	2017-04-05 23:30:00	21760	2017-04-03 11:45:00	226.584
2017-04-30 21:59:56	-0.086234	2017-04-05 23:40:00	21888	2017-04-03 11:50:00	226.582
2017-04-30 22:59:56	-0.116791	2017-04-05 23:50:00	20864	2017-04-03 11:55:00	226.585
2017-05-01	-0.127762	2017-04-06	21760	2017-04-03 12:00:00	226.58
2017-05-01 01:00:00	-0.122337	2017-04-06 00:10:00	21248	2017-04-03 12:05:00	226.583
2017-05-01 02:00:00	-0.106913	2017-04-06 00:20:00	20864	2017-04-03 12:10:00	226.584
2017-05-01 02:59:59	-0.089133	2017-04-06 00:30:00	21632	2017-04-03 12:15:00	226.587
2017-05-01 03:59:59	-0.075778	2017-04-06 00:40:00	22784	2017-04-03 12:20:00	226.585
2017-05-01 04:59:59	-0.071042	2017-04-06 00:50:00	21888	2017-04-03 12:25:00	226.586
2017-05-01 05:59:59	-0.075577	2017-04-06 01:00:00	22016	2017-04-03 12:30:00	226.585
2017-05-01 06:59:59	-0.086496	2017-04-06 01:10:00	19328	2017-04-03 12:35:00	226.583
2017-05-01 07:59:59	-0.09828	2017-04-06 01:20:00	20352	2017-04-03 12:40:00	226.584
2017-05-01 08:59:59	-0.10434	2017-04-06 01:30:00	20736	2017-04-03 12:45:00	226.585
2017-05-01 09:59:59	-0.098827	2017-04-06 01:40:00	20736	2017-04-03 12:50:00	226.587
2017-05-01 10:59:59	-0.07828	2017-04-06 01:50:00	21888	2017-04-03 12:55:00	226.586
2017-05-01 11:59:59	-0.042707	2017-04-06 02:00:00	20992	2017-04-03 13:00:00	226.585
2017-05-01 12:59:59	0.004143	2017-04-06 02:10:00	20224	2017-04-03 13:05:00	226.585
2017-05-01 13:59:59	0.055413	2017-04-06 02:20:00	21120	2017-04-03 13:10:00	226.587
2017-05-01 14:59:59	0.102519	2017-04-06 02:30:00	21248	2017-04-03 13:15:00	226.587
2017-05-01 15:59:59	0.137003	2017-04-06 02:40:00	21888	2017-04-03 13:20:00	226.587
2017-05-01 16:59:59	0.152399	2017-04-06 02:50:00	20992	2017-04-03 13:25:00	226.588
2017-05-01 17:59:59	0.145684	2017-04-06 03:00:00	20608	2017-04-03 13:30:00	226.588
2017-05-01 18:59:59	0.117954	2017-04-06 03:10:00	20736	2017-04-03 13:35:00	226.587
2017-05-01 19:59:59	0.074163	2017-04-06 03:20:00	19840	2017-04-03 13:40:00	226.588
2017-05-01 20:59:59	0.021987	2017-04-06 03:30:00	20608	2017-04-03 13:45:00	226.588
2017-05-01 21:59:59	-0.029886	2017-04-06 03:40:00	22016	2017-04-03 13:50:00	226.588
2017-05-01 22:59:59	-0.073619	2017-04-06 03:50:00	21504	2017-04-03 13:55:00	226.59
2017-05-01 23:59:59	-0.103786	2017-04-06 04:00:00	20864	2017-04-03 14:00:00	226.589
2017-05-02 00:59:59	-0.118279	2017-04-06 04:10:00	21760	2017-04-03 14:05:00	226.588
2017-05-02 01:59:59	-0.118389	2017-04-06 04:20:00	20992	2017-04-03 14:10:00	226.588
2017-05-02 02:59:59	-0.108106	2017-04-06 04:30:00	20608	2017-04-03 14:15:00	226.583
2017-05-02 03:59:59	-0.092868	2017-04-06 04:40:00	21120	2017-04-03 14:20:00	226.585
2017-05-02 04:59:59	-0.078095	2017-04-06 04:50:00	20096	2017-04-03 14:25:00	226.582
2017-05-02 05:59:59	-0.067867	2017-04-06 05:00:00	21632	2017-04-03 14:30:00	226.584
2017-05-02 06:59:59	-0.064021	2017-04-06 05:10:00	20480	2017-04-03 14:35:00	226.584
2017-05-02 07:59:59	-0.06585	2017-04-06 05:20:00	20992	2017-04-03 14:40:00	226.587
2017-05-02 08:59:59	-0.070429	2017-04-06 05:30:00	21504	2017-04-03 14:45:00	226.586
2017-05-02 09:59:59	-0.073475	2017-04-06 05:40:00	20096	2017-04-03 14:50:00	226.586
2017-05-02 10:59:59	-0.070529	2017-04-06 05:50:00	21248	2017-04-03 14:55:00	226.588
2017-05-02 11:59:59	-0.058207	2017-04-06 06:00:00	21376	2017-04-03 15:00:00	226.588
2017-05-02 12:59:59	-0.035234	2017-04-06 06:10:00	20864	2017-04-03 15:05:00	226.588
2017-05-02 13:59:59	-0.003011	2017-04-06 06:20:00	20864	2017-04-03 15:10:00	226.589
2017-05-02 14:59:59	0.034438	2017-04-06 06:30:00	22272	2017-04-03 15:15:00	226.587
2017-05-02 15:59:59	0.071166	2017-04-06 06:40:00	20224	2017-04-03 15:20:00	226.587
2017-05-02 16:59:59	0.100514	2017-04-06 06:50:00	21248	2017-04-03 15:25:00	226.588
2017-05-02 17:59:59	0.116584	2017-04-06 07:00:00	21248	2017-04-03 15:30:00	226.586
2017-05-02 18:59:59	0.115596	2017-04-06 07:10:00	20224	2017-04-03 15:35:00	226.587
2017-05-02 19:59:59	0.09683	2017-04-06 07:20:00	21504	2017-04-03 15:40:00	226.589
2017-05-02 20:59:59	0.062875	2017-04-06 07:30:00	20480	2017-04-03 15:45:00	226.587
2017-05-02 21:59:59	0.019139	2017-04-06 07:40:00	21376	2017-04-03 15:50:00	226.587
2017-05-02 22:59:59	-0.027278	2017-04-06 07:50:00	20992	2017-04-03 15:55:00	226.589
2017-05-02 23:59:59	-0.069067	2017-04-06 08:00:00	20608	2017-04-03 16:00:00	226.589
2017-05-03 00:59:59	-0.100198	2017-04-06 08:10:00	21248	2017-04-03 16:05:00	226.587
2017-05-03 01:59:59	-0.117068	2017-04-06 08:20:00	21248	2017-04-03 16:10:00	226.584
2017-05-03 02:59:59	-0.119075	2017-04-06 08:30:00	21376	2017-04-03 16:15:00	226.59
2017-05-03 03:59:59	-0.108515	2017-04-06 08:40:00	21504	2017-04-03 16:20:00	226.588
2017-05-03 04:59:59	-0.089863	2017-04-06 08:50:00	21120	2017-04-03 16:25:00	226.588
2017-05-03 05:59:59	-0.068634	2017-04-06 09:00:00	21632	2017-04-03 16:30:00	226.588
2017-05-03 06:59:59	-0.050076	2017-04-06 09:10:00	21248	2017-04-03 16:35:00	226.591
2017-05-03 07:59:59	-0.037988	2017-04-06 09:20:00	20224	2017-04-03 16:40:00	226.59
2017-05-03 08:59:59	-0.033891	2017-04-06 09:30:00	21120	2017-04-03 16:45:00	226.589
2017-05-03 09:59:59	-0.036756	2017-04-06 09:40:00	20224	2017-04-03 16:50:00	226.587
2017-05-03 10:59:59	-0.043329	2017-04-06 09:50:00	20352	2017-04-03 16:55:00	226.588
2017-05-03 11:59:59	-0.049012	2017-04-06 10:00:00	21120	2017-04-03 17:00:00	226.589
2017-05-03 12:59:59	-0.049117	2017-04-06 10:10:00	20992	2017-04-03 17:05:00	226.59
2017-05-03 13:59:59	-0.040198	2017-04-06 10:20:00	20992	2017-04-03 17:10:00	226.588
2017-05-03 14:59:59	-0.02115	2017-04-06 10:30:00	20480	2017-04-03 17:15:00	226.59
2017-05-03 15:59:59	0.006251	2017-04-06 10:40:00	22272	2017-04-03 17:20:00	226.588
2017-05-03 16:59:59	0.037516	2017-04-06 10:50:00	22272	2017-04-03 17:25:00	226.588
2017-05-03 17:59:59	0.066363	2017-04-06 11:00:00	21760	2017-04-03 17:30:00	226.59
2017-05-03 18:59:59	0.086161	2017-04-06 11:10:00	23296	2017-04-03 17:35:00	226.591
2017-05-03 19:59:59	0.091565	2017-04-06 11:20:00	21120	2017-04-03 17:40:00	226.589
2017-05-03 20:59:59	0.079927	2017-04-06 11:30:00	22400	2017-04-03 17:45:00	226.589
2017-05-03 21:59:59	0.052084	2017-04-06 11:40:00	22016	2017-04-03 17:50:00	226.591
2017-05-03 22:59:59	0.012339	2017-04-06 11:50:00	21888	2017-04-03 17:55:00	226.588
2017-05-03 23:59:59	-0.032407	2017-04-06 12:00:00	22016	2017-04-03 18:00:00	226.591
2017-05-04 00:59:59	-0.074147	2017-04-06 12:10:00	21760	2017-04-03 18:05:00	226.588
2017-05-04 01:59:59	-0.105516	2017-04-06 12:20:00	21888	2017-04-03 18:10:00	226.591
2017-05-04 02:59:59	-0.121405	2017-04-06 12:30:00	21760	2017-04-03 18:15:00	226.59
2017-05-04 03:59:59	-0.120031	2017-04-06 12:40:00	20736	2017-04-03 18:20:00	226.588
2017-05-04 04:59:59	-0.103261	2017-04-06 12:50:00	20864	2017-04-03 18:25:00	226.589
2017-05-04 05:59:59	-0.076099	2017-04-06 13:00:00	21120	2017-04-03 18:30:00	226.591
2017-05-04 06:59:59	-0.045476	2017-04-06 13:10:00	19840	2017-04-03 18:35:00	226.589
2017-05-04 07:59:59	-0.018619	2017-04-06 13:20:00	21760	2017-04-03 18:40:00	226.59
2017-05-04 08:59:59	-0.001352	2017-04-06 13:30:00	22016	2017-04-03 18:45:00	226.591
2017-05-04 09:59:59	0.003269	2017-04-06 13:40:00	21760	2017-04-03 18:50:00	226.591
2017-05-04 10:59:59	-0.004332	2017-04-06 13:50:00	21120	2017-04-03 18:55:00	226.592
2017-05-04 11:59:59	-0.020382	2017-04-06 14:00:00	20736	2017-04-03 19:00:00	226.59
2017-05-04 12:59:59	-0.038737	2017-04-06 14:10:00	21248	2017-04-03 19:05:00	226.593
2017-05-04 13:59:59	-0.052498	2017-04-06 14:20:00	21760	2017-04-03 19:10:00	226.592
2017-05-04 14:59:59	-0.055882	2017-04-06 14:30:00	20864	2017-04-03 19:15:00	226.593
2017-05-04 15:59:59	-0.045876	2017-04-06 14:40:00	20864	2017-04-03 19:20:00	226.589
2017-05-04 16:59:59	-0.023214	2017-04-06 14:50:00	21248	2017-04-03 19:25:00	226.587
2017-05-04 17:59:59	0.007606	2017-04-06 15:00:00	20864	2017-04-03 19:30:00	226.589
2017-05-04 18:59:59	0.039329	2017-04-06 15:10:00	19968	2017-04-03 19:35:00	226.591
2017-05-04 19:59:59	0.063736	2017-04-06 15:20:00	19840	2017-04-03 19:40:00	226.59
2017-05-04 20:59:59	0.073778	2017-04-06 15:30:00	20608	2017-04-03 19:45:00	226.589
2017-05-04 21:59:59	0.065474	2017-04-06 15:40:00	19584	2017-04-03 19:50:00	226.592
2017-05-04 22:59:59	0.039088	2017-04-06 15:50:00	23168	2017-04-03 19:55:00	226.591
2017-05-04 23:59:59	-0.000769	2017-04-06 16:00:00	21120	2017-04-03 20:00:00	226.59
2017-05-05 00:59:59	-0.046125	2017-04-06 16:10:00	20480	2017-04-03 20:05:00	226.589
2017-05-05 01:59:59	-0.087499	2017-04-06 16:20:00	20224	2017-04-03 20:10:00	226.591
2017-05-05 02:59:59	-0.116139	2017-04-06 16:30:00	21632	2017-04-03 20:15:00	226.591
2017-05-05 03:59:59	-0.126104	2017-04-06 16:40:00	21888	2017-04-03 20:20:00	226.59
2017-05-05 04:59:59	-0.115683	2017-04-06 16:50:00	20224	2017-04-03 20:25:00	226.59
2017-05-05 05:59:59	-0.087797	2017-04-06 17:00:00	21120	2017-04-03 20:30:00	226.59
2017-05-05 06:59:59	-0.049308	2017-04-06 17:10:00	20096	2017-04-03 20:35:00	226.591
2017-05-05 07:59:59	-0.009386	2017-04-06 17:20:00	21632	2017-04-03 20:40:00	226.593
2017-05-05 08:59:59	0.022682	2017-04-06 17:30:00	21504	2017-04-03 20:45:00	226.592
2017-05-05 09:59:59	0.039726	2017-04-06 17:40:00	22656	2017-04-03 20:50:00	226.589
2017-05-05 10:59:59	0.038438	2017-04-06 17:50:00	20096	2017-04-03 20:55:00	226.591
2017-05-05 11:59:59	0.020185	2017-04-06 18:00:00	21888	2017-04-03 21:00:00	226.588
2017-05-05 12:59:59	-0.009325	2017-04-06 18:10:00	21888	2017-04-03 21:05:00	226.591
2017-05-05 13:59:59	-0.041481	2017-04-06 18:20:00	20864	2017-04-03 21:10:00	226.59
2017-05-05 14:59:59	-0.066993	2017-04-06 18:30:00	20480	2017-04-03 21:15:00	226.588
2017-05-05 15:59:59	-0.078331	2017-04-06 18:40:00	20224	2017-04-03 21:20:00	226.587
2017-05-05 16:59:59	-0.071779	2017-04-06 18:50:00	22144	2017-04-03 21:25:00	226.588
2017-05-05 17:59:59	-0.048515	2017-04-06 19:00:00	22400	2017-04-03 21:30:00	226.59
2017-05-05 18:59:59	-0.014419	2017-04-06 19:10:00	20992	2017-04-03 21:35:00	226.589
2017-05-05 19:59:59	0.021391	2017-04-06 19:20:00	21504	2017-04-03 21:40:00	226.592
2017-05-05 20:59:59	0.04893	2017-04-06 19:30:00	21120	2017-04-03 21:45:00	226.589
2017-05-05 21:59:59	0.060008	2017-04-06 19:40:00	21760	2017-04-03 21:50:00	226.588
2017-05-05 22:59:59	0.050469	2017-04-06 19:50:00	22272	2017-04-03 21:55:00	226.591
2017-05-05 23:59:59	0.021403	2017-04-06 20:00:00	20864	2017-04-03 22:00:00	226.592
2017-05-06 00:59:59	-0.02099	2017-04-06 20:10:00	21120	2017-04-03 22:05:00	226.592
2017-05-06 01:59:59	-0.066879	2017-04-06 20:20:00	20992	2017-04-03 22:10:00	226.589
2017-05-06 02:59:59	-0.105224	2017-04-06 20:30:00	21376	2017-04-03 22:15:00	226.59
2017-05-06 03:59:59	-0.126533	2017-04-06 20:40:00	20864	2017-04-03 22:20:00	226.59
2017-05-06 04:59:59	-0.125253	2017-04-06 20:50:00	22784	2017-04-03 22:25:00	226.59
2017-05-06 05:59:59	-0.101194	2017-04-06 21:00:00	22528	2017-04-03 22:30:00	226.59
2017-05-06 06:59:59	-0.059642	2017-04-06 21:10:00	21120	2017-04-03 22:35:00	226.591
2017-05-06 07:59:59	-0.010126	2017-04-06 21:20:00	21888	2017-04-03 22:40:00	226.589
2017-05-06 08:59:59	0.035863	2017-04-06 21:30:00	21504	2017-04-03 22:45:00	226.592
2017-05-06 09:59:59	0.067655	2017-04-06 21:40:00	20992	2017-04-03 22:50:00	226.591
2017-05-06 10:59:59	0.078006	2017-04-06 21:50:00	21888	2017-04-03 22:55:00	226.589
2017-05-06 11:59:59	0.064892	2017-04-06 22:00:00	22912	2017-04-03 23:00:00	226.591
2017-05-06 12:59:59	0.032037	2017-04-06 22:10:00	22400	2017-04-03 23:05:00	226.59
2017-05-06 13:59:59	-0.011998	2017-04-06 22:20:00	22400	2017-04-03 23:10:00	226.589
2017-05-06 14:59:59	-0.055953	2017-04-06 22:30:00	22784	2017-04-03 23:15:00	226.59
2017-05-06 15:59:59	-0.08873	2017-04-06 22:40:00	20608	2017-04-03 23:20:00	226.59
2017-05-06 16:59:59	-0.102253	2017-04-06 22:50:00	21888	2017-04-03 23:25:00	226.591
2017-05-06 17:59:59	-0.09359	2017-04-06 23:00:00	22656	2017-04-03 23:30:00	226.591
2017-05-06 18:59:59	-0.065744	2017-04-06 23:10:00	23040	2017-04-03 23:35:00	226.592
2017-05-06 19:59:59	-0.026883	2017-04-06 23:20:00	22016	2017-04-03 23:40:00	226.591
2017-05-06 20:59:59	0.011809	2017-04-06 23:30:00	22400	2017-04-03 23:45:00	226.59
2017-05-06 21:59:59	0.039124	2017-04-06 23:40:00	21632	2017-04-03 23:50:00	226.592
2017-05-06 22:59:59	0.046857	2017-04-06 23:50:00	21504	2017-04-03 23:55:00	226.59
2017-05-06 23:59:59	0.032058	2017-04-07	21888	2017-04-04	226.591
2017-05-07 00:59:59	-0.00209	2017-04-07 00:10:00	22016	2017-04-04 00:05:00	226.592
2017-05-07 01:59:59	-0.047015	2017-04-07 00:20:00	22400	2017-04-04 00:10:00	226.592
2017-05-07 02:59:59	-0.090937	2017-04-07 00:30:00	22528	2017-04-04 00:15:00	226.589
2017-05-07 03:59:59	-0.12189	2017-04-07 00:40:00	21504	2017-04-04 00:20:00	226.591
2017-05-07 04:59:59	-0.130831	2017-04-07 00:50:00	22656	2017-04-04 00:25:00	226.592
2017-05-07 05:59:59	-0.11402	2017-04-07 01:00:00	22528	2017-04-04 00:30:00	226.591
2017-05-07 06:59:59	-0.074071	2017-04-07 01:10:00	22528	2017-04-04 00:35:00	226.593
2017-05-07 07:59:59	-0.019419	2017-04-07 01:20:00	20608	2017-04-04 00:40:00	226.593
2017-05-07 08:59:59	0.037678	2017-04-07 01:30:00	22400	2017-04-04 00:45:00	226.592
2017-05-07 09:59:59	0.084096	2017-04-07 01:40:00	21504	2017-04-04 00:50:00	226.59
2017-05-07 10:59:59	0.109052	2017-04-07 01:50:00	22528	2017-04-04 00:55:00	226.591
2017-05-07 11:59:59	0.106759	2017-04-07 02:00:00	21504	2017-04-04 01:00:00	226.591
2017-05-07 12:59:59	0.077885	2017-04-07 02:10:00	21120	2017-04-04 01:05:00	226.592
2017-05-07 13:59:59	0.029415	2017-04-07 02:20:00	22144	2017-04-04 01:10:00	226.592
2017-05-07 14:59:59	-0.027056	2017-04-07 02:30:00	22784	2017-04-04 01:15:00	226.591
2017-05-07 15:59:59	-0.078205	2017-04-07 02:40:00	23552	2017-04-04 01:20:00	226.589
2017-05-07 16:59:59	-0.112332	2017-04-07 02:50:00	21632	2017-04-04 01:25:00	226.592
2017-05-07 17:59:59	-0.122305	2017-04-07 03:00:00	22528	2017-04-04 01:30:00	226.59
2017-05-07 18:59:59	-0.107364	2017-04-07 03:10:00	21376	2017-04-04 01:35:00	226.593
2017-05-07 19:59:59	-0.073248	2017-04-07 03:20:00	22272	2017-04-04 01:40:00	226.591
2017-05-07 20:59:59	-0.030631	2017-04-07 03:30:00	20864	2017-04-04 01:45:00	226.592
2017-05-07 21:59:59	0.00777	2017-04-07 03:40:00	22400	2017-04-04 01:50:00	226.594
2017-05-07 22:59:59	0.030633	2017-04-07 03:50:00	22656	2017-04-04 01:55:00	226.592
2017-05-07 23:59:59	0.031111	2017-04-07 04:00:00	21632	2017-04-04 02:00:00	226.592
2017-05-08 00:59:59	0.008712	2017-04-07 04:10:00	20992	2017-04-04 02:05:00	226.593
2017-05-08 01:59:59	-0.03051	2017-04-07 04:20:00	22016	2017-04-04 02:10:00	226.594
2017-05-08 02:59:59	-0.075527	2017-04-07 04:30:00	22272	2017-04-04 02:15:00	226.592
2017-05-08 03:59:59	-0.113235	2017-04-07 04:40:00	23296	2017-04-04 02:20:00	226.594
2017-05-08 04:59:59	-0.131929	2017-04-07 04:50:00	22784	2017-04-04 02:25:00	226.593
2017-05-08 05:59:59	-0.124427	2017-04-07 05:00:00	22784	2017-04-04 02:30:00	226.593
2017-05-08 06:59:59	-0.090064	2017-04-07 05:10:00	23040	2017-04-04 02:35:00	226.592
2017-05-08 07:59:59	-0.03502	2017-04-07 05:20:00	22144	2017-04-04 02:40:00	226.593
2017-05-08 08:59:59	0.02908	2017-04-07 05:30:00	23296	2017-04-04 02:45:00	226.594
2017-05-08 09:59:59	0.087948	2017-04-07 05:40:00	20992	2017-04-04 02:50:00	226.593
2017-05-08 10:59:59	0.128108	2017-04-07 05:50:00	23168	2017-04-04 02:55:00	226.592
2017-05-08 11:59:59	0.140201	2017-04-07 06:00:00	20608	2017-04-04 03:00:00	226.594
2017-05-08 12:59:59	0.121305	2017-04-07 06:10:00	22528	2017-04-04 03:05:00	226.592
2017-05-08 13:59:59	0.075683	2017-04-07 06:20:00	20608	2017-04-04 03:10:00	226.594
2017-05-08 14:59:59	0.013758	2017-04-07 06:30:00	22912	2017-04-04 03:15:00	226.593
2017-05-08 15:59:59	-0.050437	2017-04-07 06:40:00	23552	2017-04-04 03:20:00	226.591
2017-05-08 16:59:59	-0.102729	2017-04-07 06:50:00	20992	2017-04-04 03:25:00	226.592
2017-05-08 17:59:59	-0.132315	2017-04-07 07:00:00	22016	2017-04-04 03:30:00	226.593
2017-05-08 18:59:59	-0.134408	2017-04-07 07:10:00	21888	2017-04-04 03:35:00	226.592
2017-05-08 19:59:59	-0.111344	2017-04-07 07:20:00	21120	2017-04-04 03:40:00	226.591
2017-05-08 20:59:59	-0.071831	2017-04-07 07:30:00	21504	2017-04-04 03:45:00	226.594
2017-05-08 21:59:59	-0.028523	2017-04-07 07:40:00	22528	2017-04-04 03:50:00	226.591
2017-05-08 22:59:59	0.005433	2017-04-07 07:50:00	22144	2017-04-04 03:55:00	226.592
2017-05-08 23:59:59	0.019977	2017-04-07 08:00:00	22784	2017-04-04 04:00:00	226.592
2017-05-09 00:59:59	0.010873	2017-04-07 08:10:00	20864	2017-04-04 04:05:00	226.594
2017-05-09 01:59:59	-0.019127	2017-04-07 08:20:00	20096	2017-04-04 04:10:00	226.592
2017-05-09 02:59:59	-0.061012	2017-04-07 08:30:00	21632	2017-04-04 04:15:00	226.593
2017-05-09 03:59:59	-0.101923	2017-04-07 08:40:00	21632	2017-04-04 04:20:00	226.594
2017-05-09 04:59:59	-0.128621	2017-04-07 08:50:00	20736	2017-04-04 04:25:00	226.596
2017-05-09 05:59:59	-0.131069	2017-04-07 09:00:00	20992	2017-04-04 04:30:00	226.593
2017-05-09 06:59:59	-0.10521	2017-04-07 09:10:00	21248	2017-04-04 04:35:00	226.593
2017-05-09 07:59:59	-0.054211	2017-04-07 09:20:00	22016	2017-04-04 04:40:00	226.592
2017-05-09 08:59:58	0.012143	2017-04-07 09:30:00	22528	2017-04-04 04:45:00	226.595
2017-05-09 09:59:58	0.079745	2017-04-07 09:40:00	21888	2017-04-04 04:50:00	226.594
2017-05-09 10:59:58	0.133571	2017-04-07 09:50:00	22272	2017-04-04 04:55:00	226.593
2017-05-09 11:59:58	0.161342	2017-04-07 10:00:00	21248	2017-04-04 05:00:00	226.592
2017-05-09 12:59:58	0.15654	2017-04-07 10:10:00	21504	2017-04-04 05:05:00	226.591
2017-05-09 13:59:58	0.120022	2017-04-07 10:20:00	21504	2017-04-04 05:10:00	226.59
2017-05-09 14:59:58	0.059827	2017-04-07 10:30:00	20480	2017-04-04 05:15:00	226.592
2017-05-09 15:59:58	-0.010773	2017-04-07 10:40:00	21248	2017-04-04 05:20:00	226.592
2017-05-09 16:59:58	-0.076527	2017-04-07 10:50:00	20864	2017-04-04 05:25:00	226.593
2017-05-09 17:59:58	-0.123925	2017-04-07 11:00:00	21248	2017-04-04 05:30:00	226.596
2017-05-09 18:59:58	-0.144478	2017-04-07 11:10:00	20992	2017-04-04 05:35:00	226.593
2017-05-09 19:59:58	-0.136698	2017-04-07 11:20:00	20608	2017-04-04 05:40:00	226.592
2017-05-09 20:59:58	-0.106268	2017-04-07 11:30:00	20352	2017-04-04 05:45:00	226.591
2017-05-09 21:59:58	-0.064354	2017-04-07 11:40:00	22400	2017-04-04 05:50:00	226.592
2017-05-09 22:59:58	-0.024494	2017-04-07 11:50:00	22144	2017-04-04 05:55:00	226.59
2017-05-09 23:59:58	0.001119	2017-04-07 12:00:00	20736	2017-04-04 06:00:00	226.591
2017-05-10 00:59:58	0.004957	2017-04-07 12:10:00	20864	2017-04-04 06:05:00	226.593
2017-05-10 01:59:58	-0.013801	2017-04-07 12:20:00	21120	2017-04-04 06:10:00	226.592
2017-05-10 02:59:58	-0.049052	2017-04-07 12:30:00	20608	2017-04-04 06:15:00	226.589
2017-05-10 03:59:58	-0.089441	2017-04-07 12:40:00	19328	2017-04-04 06:20:00	226.592
2017-05-10 04:59:58	-0.12146	2017-04-07 12:50:00	20992	2017-04-04 06:25:00	226.589
2017-05-10 05:59:58	-0.13315	2017-04-07 13:00:00	20480	2017-04-04 06:30:00	226.592
2017-05-10 06:59:58	-0.117419	2017-04-07 13:10:00	21632	2017-04-04 06:35:00	226.591
2017-05-10 07:59:58	-0.074111	2017-04-07 13:20:00	21760	2017-04-04 06:40:00	226.592
2017-05-10 08:59:58	-0.010276	2017-04-07 13:30:00	20608	2017-04-04 06:45:00	226.591
2017-05-10 09:59:58	0.061398	2017-04-07 13:40:00	21376	2017-04-04 06:50:00	226.594
2017-05-10 10:59:58	0.125613	2017-04-07 13:50:00	20352	2017-04-04 06:55:00	226.592
2017-05-10 11:59:58	0.168165	2017-04-07 14:00:00	20352	2017-04-04 07:00:00	226.593
2017-05-10 12:59:58	0.179406	2017-04-07 14:10:00	19584	2017-04-04 07:05:00	226.592
2017-05-10 13:59:58	0.156594	2017-04-07 14:20:00	20736	2017-04-04 07:10:00	226.593
2017-05-10 14:59:58	0.104569	2017-04-07 14:30:00	21120	2017-04-04 07:15:00	226.596
2017-05-10 15:59:58	0.034573	2017-04-07 14:40:00	20096	2017-04-04 07:20:00	226.593
2017-05-10 16:59:58	-0.038487	2017-04-07 14:50:00	20352	2017-04-04 07:25:00	226.595
2017-05-10 17:59:58	-0.099656	2017-04-07 15:00:00	20224	2017-04-04 07:30:00	226.592
2017-05-10 18:59:58	-0.137526	2017-04-07 15:10:00	21248	2017-04-04 07:35:00	226.594
2017-05-10 19:59:58	-0.146905	2017-04-07 15:20:00	19712	2017-04-04 07:40:00	226.591
2017-05-10 20:59:58	-0.129882	2017-04-07 15:30:00	21632	2017-04-04 07:45:00	226.591
2017-05-10 21:59:58	-0.095012	2017-04-07 15:40:00	19456	2017-04-04 07:50:00	226.592
2017-05-10 22:59:58	-0.054835	2017-04-07 15:50:00	21248	2017-04-04 07:55:00	226.595
2017-05-10 23:59:58	-0.022386	2017-04-07 16:00:00	21120	2017-04-04 08:00:00	226.59
2017-05-11 00:59:58	-0.007617	2017-04-07 16:10:00	21248	2017-04-04 08:05:00	226.592
2017-05-11 01:59:58	-0.014691	2017-04-07 16:20:00	20992	2017-04-04 08:10:00	226.591
2017-05-11 02:59:58	-0.040865	2017-04-07 16:30:00	19968	2017-04-04 08:15:00	226.592
2017-05-11 03:59:58	-0.077274	2017-04-07 16:40:00	21760	2017-04-04 08:20:00	226.592
2017-05-11 04:59:58	-0.111381	2017-04-07 16:50:00	20096	2017-04-04 08:25:00	226.591
2017-05-11 05:59:58	-0.130448	2017-04-07 17:00:00	20736	2017-04-04 08:30:00	226.595
2017-05-11 06:59:58	-0.125089	2017-04-07 17:10:00	20480	2017-04-04 08:35:00	226.592
2017-05-11 07:59:58	-0.09196	2017-04-07 17:20:00	21248	2017-04-04 08:40:00	226.594
2017-05-11 08:59:58	-0.034887	2017-04-07 17:30:00	20352	2017-04-04 08:45:00	226.593
2017-05-11 09:59:58	0.035864	2017-04-07 17:40:00	19840	2017-04-04 08:50:00	226.593
2017-05-11 10:59:58	0.105977	2017-04-07 17:50:00	21632	2017-04-04 08:55:00	226.591
2017-05-11 11:59:58	0.160516	2017-04-07 18:00:00	22016	2017-04-04 09:00:00	226.591
2017-05-11 12:59:58	0.187543	2017-04-07 18:10:00	21888	2017-04-04 09:05:00	226.594
2017-05-11 13:59:58	0.180997	2017-04-07 18:20:00	20096	2017-04-04 09:10:00	226.591
2017-05-11 14:59:58	0.142151	2017-04-07 18:30:00	21248	2017-04-04 09:15:00	226.593
2017-05-11 15:59:58	0.079286	2017-04-07 18:40:00	20224	2017-04-04 09:20:00	226.593
2017-05-11 16:59:58	0.005662	2017-04-07 18:50:00	20736	2017-04-04 09:25:00	226.592
2017-05-11 17:59:58	-0.063687	2017-04-07 19:00:00	21504	2017-04-04 09:30:00	226.593
2017-05-11 18:59:58	-0.115547	2017-04-07 19:10:00	21760	2017-04-04 09:35:00	226.593
2017-05-11 19:59:58	-0.141619	2017-04-07 19:20:00	21120	2017-04-04 09:40:00	226.592
2017-05-11 20:59:58	-0.140326	2017-04-07 19:30:00	21632	2017-04-04 09:45:00	226.595
2017-05-11 21:59:58	-0.116896	2017-04-07 19:40:00	20224	2017-04-04 09:50:00	226.595
2017-05-11 22:59:58	-0.081696	2017-04-07 19:50:00	21632	2017-04-04 09:55:00	226.594
2017-05-11 23:59:58	-0.04727	2017-04-07 20:00:00	22784	2017-04-04 10:00:00	226.594
2017-05-12 00:59:58	-0.024852	2017-04-07 20:10:00	22912	2017-04-04 10:05:00	226.594
2017-05-12 01:59:58	-0.021287	2017-04-07 20:20:00	20992	2017-04-04 10:10:00	226.59
2017-05-12 02:59:58	-0.037184	2017-04-07 20:30:00	22272	2017-04-04 10:15:00	226.593
2017-05-12 03:59:58	-0.066786	2017-04-07 20:40:00	21760	2017-04-04 10:20:00	226.592
2017-05-12 04:59:58	-0.099591	2017-04-07 20:50:00	21632	2017-04-04 10:25:00	226.594
2017-05-12 05:59:58	-0.12329	2017-04-07 21:00:00	21632	2017-04-04 10:30:00	226.593
2017-05-12 06:59:58	-0.127216	2017-04-07 21:10:00	21376	2017-04-04 10:35:00	226.595
2017-05-12 07:59:58	-0.105387	2017-04-07 21:20:00	21248	2017-04-04 10:40:00	226.593
2017-05-12 08:59:58	-0.058336	2017-04-07 21:30:00	22144	2017-04-04 10:45:00	226.595
2017-05-12 09:59:58	0.006758	2017-04-07 21:40:00	21248	2017-04-04 10:50:00	226.593
2017-05-12 10:59:58	0.077651	2017-04-07 21:50:00	21504	2017-04-04 10:55:00	226.591
2017-05-12 11:59:58	0.139931	2017-04-07 22:00:00	21632	2017-04-04 11:00:00	226.593
2017-05-12 12:59:58	0.180467	2017-04-07 22:10:00	21632	2017-04-04 11:05:00	226.592
2017-05-12 13:59:58	0.190562	2017-04-07 22:20:00	21504	2017-04-04 11:10:00	226.595
2017-05-12 14:59:58	0.168018	2017-04-07 22:30:00	21376	2017-04-04 11:15:00	226.591
2017-05-12 15:59:58	0.117622	2017-04-07 22:40:00	21248	2017-04-04 11:20:00	226.592
2017-05-12 16:59:58	0.049946	2017-04-07 22:50:00	22400	2017-04-04 11:25:00	226.593
2017-05-12 17:59:58	-0.021209	2017-04-07 23:00:00	20352	2017-04-04 11:30:00	226.593
2017-05-12 18:59:58	-0.082116	2017-04-07 23:10:00	21376	2017-04-04 11:35:00	226.592
2017-05-12 19:59:58	-0.122326	2017-04-07 23:20:00	22528	2017-04-04 11:40:00	226.592
2017-05-12 20:59:58	-0.136992	2017-04-07 23:30:00	22784	2017-04-04 11:45:00	226.595
2017-05-12 21:59:58	-0.127754	2017-04-07 23:40:00	22016	2017-04-04 11:50:00	226.593
2017-05-12 22:59:58	-0.101959	2017-04-07 23:50:00	21888	2017-04-04 11:55:00	226.592
2017-05-12 23:59:58	-0.070445	2017-04-08	22528	2017-04-04 12:00:00	226.593
2017-05-13 00:59:58	-0.044462	2017-04-08 00:10:00	21504	2017-04-04 12:05:00	226.591
2017-05-13 01:59:58	-0.032562	2017-04-08 00:20:00	21632	2017-04-04 12:10:00	226.592
2017-05-13 02:59:58	-0.03826	2017-04-08 00:30:00	22400	2017-04-04 12:15:00	226.591
2017-05-13 03:59:58	-0.059113	2017-04-08 00:40:00	20992	2017-04-04 12:20:00	226.593
2017-05-13 04:59:58	-0.087435	2017-04-08 00:50:00	21120	2017-04-04 12:25:00	226.592
2017-05-13 05:59:58	-0.112474	2017-04-08 01:00:00	20736	2017-04-04 12:30:00	226.593
2017-05-13 06:59:58	-0.123444	2017-04-08 01:10:00	23040	2017-04-04 12:35:00	226.591
2017-05-13 07:59:58	-0.1126	2017-04-08 01:20:00	20352	2017-04-04 12:40:00	226.594
2017-05-13 08:59:58	-0.07753	2017-04-08 01:30:00	21632	2017-04-04 12:45:00	226.593
2017-05-13 09:59:58	-0.02206	2017-04-08 01:40:00	22144	2017-04-04 12:50:00	226.594
2017-05-13 10:59:58	0.044464	2017-04-08 01:50:00	21760	2017-04-04 12:55:00	226.592
2017-05-13 11:59:58	0.10932	2017-04-08 02:00:00	21120	2017-04-04 13:00:00	226.596
2017-05-13 12:59:58	0.159423	2017-04-08 02:10:00	20736	2017-04-04 13:05:00	226.594
2017-05-13 13:59:58	0.184432	2017-04-08 02:20:00	21504	2017-04-04 13:10:00	226.592
2017-05-13 14:59:58	0.179192	2017-04-08 02:30:00	20992	2017-04-04 13:15:00	226.596
2017-05-13 15:59:58	0.144902	2017-04-08 02:40:00	21632	2017-04-04 13:20:00	226.593
2017-05-13 16:59:58	0.088765	2017-04-08 02:50:00	20992	2017-04-04 13:25:00	226.595
2017-05-13 17:59:58	0.022209	2017-04-08 03:00:00	20224	2017-04-04 13:30:00	226.595
2017-05-13 18:59:58	-0.041837	2017-04-08 03:10:00	19968	2017-04-04 13:35:00	226.595
2017-05-13 19:59:58	-0.091966	2017-04-08 03:20:00	21120	2017-04-04 13:40:00	226.592
2017-05-13 20:59:58	-0.120851	2017-04-08 03:30:00	22400	2017-04-04 13:45:00	226.594
2017-05-13 21:59:58	-0.126734	2017-04-08 03:40:00	19584	2017-04-04 13:50:00	226.596
2017-05-13 22:59:58	-0.113492	2017-04-08 03:50:00	20608	2017-04-04 13:55:00	226.594
2017-05-13 23:59:58	-0.089283	2017-04-08 04:00:00	20736	2017-04-04 14:00:00	226.593
2017-05-14 00:59:58	-0.064139	2017-04-08 04:10:00	21376	2017-04-04 14:05:00	226.598
2017-05-14 01:59:58	-0.047141	2017-04-08 04:20:00	21248	2017-04-04 14:10:00	226.594
2017-05-14 02:59:58	-0.043914	2017-04-08 04:30:00	21248	2017-04-04 14:15:00	226.591
2017-05-14 03:59:58	-0.055112	2017-04-08 04:40:00	20736	2017-04-04 14:20:00	226.595
2017-05-14 04:59:58	-0.076285	2017-04-08 04:50:00	20864	2017-04-04 14:25:00	226.593
2017-05-14 05:59:58	-0.099171	2017-04-08 05:00:00	21120	2017-04-04 14:30:00	226.594
2017-05-14 06:59:58	-0.114043	2017-04-08 05:10:00	21888	2017-04-04 14:35:00	226.596
2017-05-14 07:59:58	-0.112493	2017-04-08 05:20:00	21632	2017-04-04 14:40:00	226.593
2017-05-14 08:59:58	-0.089886	2017-04-08 05:30:00	20992	2017-04-04 14:45:00	226.594
2017-05-14 09:59:58	-0.046838	2017-04-08 05:40:00	21248	2017-04-04 14:50:00	226.596
2017-05-14 10:59:58	0.010673	2017-04-08 05:50:00	19968	2017-04-04 14:55:00	226.595
2017-05-14 11:59:58	0.072591	2017-04-08 06:00:00	20480	2017-04-04 15:00:00	226.595
2017-05-14 12:59:58	0.127111	2017-04-08 06:10:00	22784	2017-04-04 15:05:00	226.597
2017-05-14 13:59:58	0.163449	2017-04-08 06:20:00	20864	2017-04-04 15:10:00	226.595
2017-05-14 14:59:58	0.174365	2017-04-08 06:30:00	20736	2017-04-04 15:15:00	226.595
2017-05-14 15:59:58	0.157811	2017-04-08 06:40:00	21376	2017-04-04 15:20:00	226.598
2017-05-14 16:59:58	0.117334	2017-04-08 06:50:00	20608	2017-04-04 15:25:00	226.597
2017-05-14 17:59:58	0.061153	2017-04-08 07:00:00	21888	2017-04-04 15:30:00	226.594
2017-05-14 18:59:58	0.000187	2017-04-08 07:10:00	19456	2017-04-04 15:35:00	226.595
2017-05-14 19:59:58	-0.054498	2017-04-08 07:20:00	21248	2017-04-04 15:40:00	226.595
2017-05-14 20:59:58	-0.094172	2017-04-08 07:30:00	20608	2017-04-04 15:45:00	226.598
2017-05-14 21:59:58	-0.11428	2017-04-08 07:40:00	21248	2017-04-04 15:50:00	226.595
2017-05-14 22:59:58	-0.115203	2017-04-08 07:50:00	20992	2017-04-04 15:55:00	226.596
2017-05-14 23:59:58	-0.101782	2017-04-08 08:00:00	22016	2017-04-04 16:00:00	226.593
2017-05-15 00:59:58	-0.081748	2017-04-08 08:10:00	21760	2017-04-04 16:05:00	226.595
2017-05-15 01:59:58	-0.063469	2017-04-08 08:20:00	22400	2017-04-04 16:10:00	226.595
2017-05-15 02:59:58	-0.053615	2017-04-08 08:30:00	20480	2017-04-04 16:15:00	226.595
2017-05-15 03:59:58	-0.055337	2017-04-08 08:40:00	21760	2017-04-04 16:20:00	226.592
2017-05-15 04:59:58	-0.067449	2017-04-08 08:50:00	20352	2017-04-04 16:25:00	226.592
2017-05-15 05:59:58	-0.084815	2017-04-08 09:00:00	21248	2017-04-04 16:30:00	226.595
2017-05-15 06:59:58	-0.099844	2017-04-08 09:10:00	22144	2017-04-04 16:35:00	226.594
2017-05-15 07:59:58	-0.104677	2017-04-08 09:20:00	20608	2017-04-04 16:40:00	226.594
2017-05-15 08:59:58	-0.093474	2017-04-08 09:30:00	22528	2017-04-04 16:45:00	226.596
2017-05-15 09:59:58	-0.064193	2017-04-08 09:40:00	21120	2017-04-04 16:50:00	226.597
2017-05-15 10:59:58	-0.019369	2017-04-08 09:50:00	21888	2017-04-04 16:55:00	226.596
2017-05-15 11:59:58	0.034288	2017-04-08 10:00:00	20992	2017-04-04 17:00:00	226.597
2017-05-15 12:59:58	0.087373	2017-04-08 10:10:00	21760	2017-04-04 17:05:00	226.595
2017-05-15 13:59:58	0.129949	2017-04-08 10:20:00	21760	2017-04-04 17:10:00	226.595
2017-05-15 14:59:58	0.153843	2017-04-08 10:30:00	20608	2017-04-04 17:15:00	226.595
2017-05-15 15:59:58	0.154495	2017-04-08 10:40:00	21760	2017-04-04 17:20:00	226.594
2017-05-15 16:59:58	0.131944	2017-04-08 10:50:00	22656	2017-04-04 17:25:00	226.595
2017-05-15 17:59:58	0.090727	2017-04-08 11:00:00	22784	2017-04-04 17:30:00	226.594
2017-05-15 18:59:58	0.038757	2017-04-08 11:10:00	21760	2017-04-04 17:35:00	226.595
2017-05-15 19:59:58	-0.014517	2017-04-08 11:20:00	20480	2017-04-04 17:40:00	226.595
2017-05-15 20:59:58	-0.060224	2017-04-08 11:30:00	21376	2017-04-04 17:45:00	226.594
2017-05-15 21:59:58	-0.091957	2017-04-08 11:40:00	22272	2017-04-04 17:50:00	226.594
2017-05-15 22:59:58	-0.106999	2017-04-08 11:50:00	20864	2017-04-04 17:55:00	226.594
2017-05-15 23:59:58	-0.106627	2017-04-08 12:00:00	21760	2017-04-04 18:00:00	226.595
2017-05-16 00:59:58	-0.095442	2017-04-08 12:10:00	21632	2017-04-04 18:05:00	226.594
2017-05-16 01:59:58	-0.079919	2017-04-08 12:20:00	21248	2017-04-04 18:10:00	226.591
2017-05-16 02:59:58	-0.06655	2017-04-08 12:30:00	21376	2017-04-04 18:15:00	226.593
2017-05-16 03:59:58	-0.060054	2017-04-08 12:40:00	21760	2017-04-04 18:20:00	226.596
2017-05-16 04:59:58	-0.062126	2017-04-08 12:50:00	21376	2017-04-04 18:25:00	226.593
2017-05-16 05:59:58	-0.071036	2017-04-08 13:00:00	22272	2017-04-04 18:30:00	226.595
2017-05-16 06:59:58	-0.08219	2017-04-08 13:10:00	20736	2017-04-04 18:35:00	226.594
2017-05-16 07:59:58	-0.089487	2017-04-08 13:20:00	20736	2017-04-04 18:40:00	226.597
2017-05-16 08:59:58	-0.087115	2017-04-08 13:30:00	20864	2017-04-04 18:45:00	226.597
2017-05-16 09:59:58	-0.071285	2017-04-08 13:40:00	21504	2017-04-04 18:50:00	226.596
2017-05-16 10:59:58	-0.041449	2017-04-08 13:50:00	20480	2017-04-04 18:55:00	226.596
2017-05-16 11:59:58	-0.000665	2017-04-08 14:00:00	20480	2017-04-04 19:00:00	226.596
2017-05-16 12:59:58	0.044955	2017-04-08 14:10:00	21120	2017-04-04 19:05:00	226.595
2017-05-16 13:59:58	0.08759	2017-04-08 14:20:00	20992	2017-04-04 19:10:00	226.596
2017-05-16 14:59:58	0.119464	2017-04-08 14:30:00	20352	2017-04-04 19:15:00	226.594
2017-05-16 15:59:58	0.134595	2017-04-08 14:40:00	20224	2017-04-04 19:20:00	226.593
2017-05-16 16:59:58	0.130097	2017-04-08 14:50:00	20736	2017-04-04 19:25:00	226.595
2017-05-16 17:59:58	0.106769	2017-04-08 15:00:00	21120	2017-04-04 19:30:00	226.592
2017-05-16 18:59:58	0.068843	2017-04-08 15:10:00	20096	2017-04-04 19:35:00	226.592
2017-05-16 19:59:58	0.02301	2017-04-08 15:20:00	20992	2017-04-04 19:40:00	226.595
2017-05-16 20:59:58	-0.023055	2017-04-08 15:30:00	20352	2017-04-04 19:45:00	226.594
2017-05-16 21:59:58	-0.062305	2017-04-08 15:40:00	20864	2017-04-04 19:50:00	226.592
2017-05-16 22:59:58	-0.089719	2017-04-08 15:50:00	19712	2017-04-04 19:55:00	226.596
2017-05-16 23:59:58	-0.103188	2017-04-08 16:00:00	20992	2017-04-04 20:00:00	226.595
2017-05-17 00:59:58	-0.103709	2017-04-08 16:10:00	19200	2017-04-04 20:05:00	226.593
2017-05-17 01:59:58	-0.094853	2017-04-08 16:20:00	20480	2017-04-04 20:10:00	226.592
2017-05-17 02:59:58	-0.08166	2017-04-08 16:30:00	20224	2017-04-04 20:15:00	226.596
2017-05-17 03:59:58	-0.069232	2017-04-08 16:40:00	21120	2017-04-04 20:20:00	226.593
2017-05-17 04:59:58	-0.061375	2017-04-08 16:50:00	19712	2017-04-04 20:25:00	226.592
2017-05-17 05:59:58	-0.059625	2017-04-08 17:00:00	19840	2017-04-04 20:30:00	226.594
2017-05-17 06:59:58	-0.062927	2017-04-08 17:10:00	22272	2017-04-04 20:35:00	226.594
2017-05-17 07:59:58	-0.068028	2017-04-08 17:20:00	21632	2017-04-04 20:40:00	226.594
2017-05-17 08:59:58	-0.070478	2017-04-08 17:30:00	20480	2017-04-04 20:45:00	226.595
2017-05-17 09:59:58	-0.065975	2017-04-08 17:40:00	21504	2017-04-04 20:50:00	226.593
2017-05-17 10:59:58	-0.051677	2017-04-08 17:50:00	21504	2017-04-04 20:55:00	226.593
2017-05-17 11:59:58	-0.027137	2017-04-08 18:00:00	20352	2017-04-04 21:00:00	226.596
2017-05-17 12:59:58	0.005383	2017-04-08 18:10:00	20992	2017-04-04 21:05:00	226.595
2017-05-17 13:59:58	0.041292	2017-04-08 18:20:00	21376	2017-04-04 21:10:00	226.595
2017-05-17 14:59:58	0.074625	2017-04-08 18:30:00	21760	2017-04-04 21:15:00	226.591
2017-05-17 15:59:58	0.099347	2017-04-08 18:40:00	21888	2017-04-04 21:20:00	226.593
2017-05-17 16:59:57	0.110659	2017-04-08 18:50:00	20864	2017-04-04 21:25:00	226.594
2017-05-17 17:59:57	0.106037	2017-04-08 19:00:00	20224	2017-04-04 21:30:00	226.592
2017-05-17 18:59:57	0.085769	2017-04-08 19:10:00	20608	2017-04-04 21:35:00	226.594
2017-05-17 19:59:57	0.052898	2017-04-08 19:20:00	20352	2017-04-04 21:40:00	226.591
2017-05-17 20:59:57	0.012613	2017-04-08 19:30:00	20096	2017-04-04 21:45:00	226.596
2017-05-17 21:59:57	-0.02879	2017-04-08 19:40:00	20864	2017-04-04 21:50:00	226.595
2017-05-17 22:59:57	-0.065137	2017-04-08 19:50:00	20736	2017-04-04 21:55:00	226.596
2017-05-17 23:59:57	-0.091564	2017-04-08 20:00:00	20224	2017-04-04 22:00:00	226.592
2017-05-18 00:59:57	-0.105411	2017-04-08 20:10:00	20224	2017-04-04 22:05:00	226.596
2017-05-18 01:59:57	-0.106628	2017-04-08 20:20:00	21376	2017-04-04 22:10:00	226.595
2017-05-18 02:59:57	-0.097611	2017-04-08 20:30:00	20480	2017-04-04 22:15:00	226.596
2017-05-18 03:59:57	-0.082495	2017-04-08 20:40:00	21248	2017-04-04 22:20:00	226.595
2017-05-18 04:59:57	-0.066058	2017-04-08 20:50:00	21248	2017-04-04 22:25:00	226.595
2017-05-18 05:59:57	-0.05251	2017-04-08 21:00:00	21376	2017-04-04 22:30:00	226.593
2017-05-18 06:59:57	-0.044457	2017-04-08 21:10:00	22656	2017-04-04 22:35:00	226.592
2017-05-18 07:59:57	-0.042313	2017-04-08 21:20:00	22272	2017-04-04 22:40:00	226.593
2017-05-18 08:59:57	-0.044311	2017-04-08 21:30:00	21760	2017-04-04 22:45:00	226.594
2017-05-18 09:59:57	-0.047096	2017-04-08 21:40:00	22144	2017-04-04 22:50:00	226.595
2017-05-18 10:59:57	-0.046754	2017-04-08 21:50:00	20224	2017-04-04 22:55:00	226.593
2017-05-18 11:59:57	-0.039987	2017-04-08 22:00:00	22016	2017-04-04 23:00:00	226.594
2017-05-18 12:59:57	-0.025117	2017-04-08 22:10:00	21888	2017-04-04 23:05:00	226.593
2017-05-18 13:59:57	-0.002693	2017-04-08 22:20:00	21888	2017-04-04 23:10:00	226.595
2017-05-18 14:59:57	0.024486	2017-04-08 22:30:00	22144	2017-04-04 23:15:00	226.596
2017-05-18 15:59:57	0.051892	2017-04-08 22:40:00	20352	2017-04-04 23:20:00	226.596
2017-05-18 16:59:57	0.074222	2017-04-08 22:50:00	22784	2017-04-04 23:25:00	226.593
2017-05-18 17:59:57	0.08656	2017-04-08 23:00:00	21760	2017-04-04 23:30:00	226.596
2017-05-18 18:59:57	0.085488	2017-04-08 23:10:00	22144	2017-04-04 23:35:00	226.595
2017-05-18 19:59:57	0.069912	2017-04-08 23:20:00	23424	2017-04-04 23:40:00	226.594
2017-05-18 20:59:57	0.041426	2017-04-08 23:30:00	21632	2017-04-04 23:45:00	226.595
2017-05-18 21:59:57	0.00413	2017-04-08 23:40:00	21248	2017-04-04 23:50:00	226.596
2017-05-18 22:59:57	-0.036096	2017-04-08 23:50:00	22912	2017-04-04 23:55:00	226.593
2017-05-18 23:59:57	-0.072722	2017-04-09	22656	2017-04-05	226.596
2017-05-19 00:59:57	-0.099886	2017-04-09 00:10:00	21760	2017-04-05 00:05:00	226.591
2017-05-19 01:59:57	-0.113628	2017-04-09 00:20:00	23424	2017-04-05 00:10:00	226.592
2017-05-19 02:59:57	-0.112733	2017-04-09 00:30:00	20352	2017-04-05 00:15:00	226.596
2017-05-19 03:59:57	-0.098981	2017-04-09 00:40:00	21888	2017-04-05 00:20:00	226.595
2017-05-19 04:59:57	-0.076693	2017-04-09 00:50:00	21376	2017-04-05 00:25:00	226.596
2017-05-19 05:59:57	-0.051673	2017-04-09 01:00:00	21376	2017-04-05 00:30:00	226.596
2017-05-19 06:59:57	-0.029779	2017-04-09 01:10:00	19456	2017-04-05 00:35:00	226.592
2017-05-19 07:59:57	-0.015491	2017-04-09 01:20:00	20864	2017-04-05 00:40:00	226.595
2017-05-19 08:59:57	-0.010839	2017-04-09 01:30:00	21760	2017-04-05 00:45:00	226.596
2017-05-19 09:59:57	-0.014978	2017-04-09 01:40:00	21632	2017-04-05 00:50:00	226.595
2017-05-19 10:59:57	-0.024519	2017-04-09 01:50:00	22144	2017-04-05 00:55:00	226.595
2017-05-19 11:59:57	-0.034519	2017-04-09 02:00:00	21632	2017-04-05 01:00:00	226.595
2017-05-19 12:59:57	-0.039879	2017-04-09 02:10:00	21376	2017-04-05 01:05:00	226.597
2017-05-19 13:59:57	-0.036767	2017-04-09 02:20:00	20864	2017-04-05 01:10:00	226.596
2017-05-19 14:59:57	-0.023728	2017-04-09 02:30:00	21120	2017-04-05 01:15:00	226.596
2017-05-19 15:59:57	-0.002178	2017-04-09 02:40:00	21632	2017-04-05 01:20:00	226.597
2017-05-19 16:59:57	0.023801	2017-04-09 02:50:00	21120	2017-04-05 01:25:00	226.597
2017-05-19 17:59:57	0.048356	2017-04-09 03:00:00	21888	2017-04-05 01:30:00	226.596
2017-05-19 18:59:57	0.065213	2017-04-09 03:10:00	21120	2017-04-05 01:35:00	226.597
2017-05-19 19:59:57	0.069205	2017-04-09 03:20:00	21888	2017-04-05 01:40:00	226.598
2017-05-19 20:59:57	0.057605	2017-04-09 03:30:00	21632	2017-04-05 01:45:00	226.595
2017-05-19 21:59:57	0.030975	2017-04-09 03:40:00	21504	2017-04-05 01:50:00	226.596
2017-05-19 22:59:57	-0.00672	2017-04-09 03:50:00	20224	2017-04-05 01:55:00	226.594
2017-05-19 23:59:57	-0.048795	2017-04-09 04:00:00	21376	2017-04-05 02:00:00	226.595
2017-05-20 00:59:57	-0.087219	2017-04-09 04:10:00	21376	2017-04-05 02:05:00	226.598
2017-05-20 01:59:57	-0.114402	2017-04-09 04:20:00	20992	2017-04-05 02:10:00	226.598
2017-05-20 02:59:57	-0.124977	2017-04-09 04:30:00	21632	2017-04-05 02:15:00	226.598
2017-05-20 03:59:57	-0.117135	2017-04-09 04:40:00	20352	2017-04-05 02:20:00	226.598
2017-05-20 04:59:57	-0.093143	2017-04-09 04:50:00	22912	2017-04-05 02:25:00	226.595
2017-05-20 05:59:57	-0.058867	2017-04-09 05:00:00	20736	2017-04-05 02:30:00	226.596
2017-05-20 06:59:57	-0.02239	2017-04-09 05:10:00	20864	2017-04-05 02:35:00	226.596
2017-05-20 07:59:57	0.007968	2017-04-09 05:20:00	21632	2017-04-05 02:40:00	226.6
2017-05-20 08:59:57	0.025697	2017-04-09 05:30:00	22144	2017-04-05 02:45:00	226.596
2017-05-20 09:59:57	0.027701	2017-04-09 05:40:00	20992	2017-04-05 02:50:00	226.597
2017-05-20 10:59:57	0.015019	2017-04-09 05:50:00	22016	2017-04-05 02:55:00	226.596
2017-05-20 11:59:57	-0.007517	2017-04-09 06:00:00	19968	2017-04-05 03:00:00	226.596
2017-05-20 12:59:57	-0.032604	2017-04-09 06:10:00	21376	2017-04-05 03:05:00	226.595
2017-05-20 13:59:57	-0.052413	2017-04-09 06:20:00	21376	2017-04-05 03:10:00	226.599
2017-05-20 14:59:57	-0.060657	2017-04-09 06:30:00	20480	2017-04-05 03:15:00	226.597
2017-05-20 15:59:57	-0.054259	2017-04-09 06:40:00	20864	2017-04-05 03:20:00	226.597
2017-05-20 16:59:57	-0.034208	2017-04-09 06:50:00	20608	2017-04-05 03:25:00	226.596
2017-05-20 17:59:57	-0.005378	2017-04-09 07:00:00	20736	2017-04-05 03:30:00	226.598
2017-05-20 18:59:57	0.024626	2017-04-09 07:10:00	20736	2017-04-05 03:35:00	226.6
2017-05-20 19:59:57	0.047348	2017-04-09 07:20:00	20992	2017-04-05 03:40:00	226.596
2017-05-20 20:59:57	0.05563	2017-04-09 07:30:00	21120	2017-04-05 03:45:00	226.597
2017-05-20 21:59:57	0.045526	2017-04-09 07:40:00	21376	2017-04-05 03:50:00	226.601
2017-05-20 22:59:57	0.017495	2017-04-09 07:50:00	20992	2017-04-05 03:55:00	226.599
2017-05-20 23:59:57	-0.023443	2017-04-09 08:00:00	20992	2017-04-05 04:00:00	226.598
2017-05-21 00:59:57	-0.068694	2017-04-09 08:10:00	21248	2017-04-05 04:05:00	226.596
2017-05-21 01:59:57	-0.108027	2017-04-09 08:20:00	20864	2017-04-05 04:10:00	226.596
2017-05-21 02:59:57	-0.132034	2017-04-09 08:30:00	21632	2017-04-05 04:15:00	226.598
2017-05-21 03:59:57	-0.134512	2017-04-09 08:40:00	21376	2017-04-05 04:20:00	226.597
2017-05-21 04:59:57	-0.114149	2017-04-09 08:50:00	22272	2017-04-05 04:25:00	226.598
2017-05-21 05:59:57	-0.07503	2017-04-09 09:00:00	21504	2017-04-05 04:30:00	226.595
2017-05-21 06:59:57	-0.025791	2017-04-09 09:10:00	22016	2017-04-05 04:35:00	226.598
2017-05-21 07:59:57	0.022418	2017-04-09 09:20:00	21504	2017-04-05 04:40:00	226.596
2017-05-21 08:59:57	0.058661	2017-04-09 09:30:00	22016	2017-04-05 04:45:00	226.599
2017-05-21 09:59:57	0.074935	2017-04-09 09:40:00	21632	2017-04-05 04:50:00	226.596
2017-05-21 10:59:57	0.068164	2017-04-09 09:50:00	20608	2017-04-05 04:55:00	226.596
2017-05-21 11:59:57	0.040937	2017-04-09 10:00:00	20352	2017-04-05 05:00:00	226.597
2017-05-21 12:59:57	0.000809	2017-04-09 10:10:00	21632	2017-04-05 05:05:00	226.597
2017-05-21 13:59:57	-0.041669	2017-04-09 10:20:00	22784	2017-04-05 05:10:00	226.596
2017-05-21 14:59:57	-0.075656	2017-04-09 10:30:00	20864	2017-04-05 05:15:00	226.597
2017-05-21 15:59:57	-0.092786	2017-04-09 10:40:00	21504	2017-04-05 05:20:00	226.595
2017-05-21 16:59:57	-0.089276	2017-04-09 10:50:00	21376	2017-04-05 05:25:00	226.595
2017-05-21 17:59:57	-0.066863	2017-04-09 11:00:00	21376	2017-04-05 05:30:00	226.599
2017-05-21 18:59:57	-0.032347	2017-04-09 11:10:00	21632	2017-04-05 05:35:00	226.598
2017-05-21 19:59:57	0.004156	2017-04-09 11:20:00	21376	2017-04-05 05:40:00	226.597
2017-05-21 20:59:57	0.03181	2017-04-09 11:30:00	21760	2017-04-05 05:45:00	226.595
2017-05-21 21:59:57	0.041889	2017-04-09 11:40:00	20992	2017-04-05 05:50:00	226.598
2017-05-21 22:59:57	0.030132	2017-04-09 11:50:00	23040	2017-04-05 05:55:00	226.596
2017-05-21 23:59:57	-0.001969	2017-04-09 12:00:00	23040	2017-04-05 06:00:00	226.595
2017-05-22 00:59:57	-0.047303	2017-04-09 12:10:00	21120	2017-04-05 06:05:00	226.598
2017-05-22 01:59:57	-0.094733	2017-04-09 12:20:00	22144	2017-04-05 06:10:00	226.597
2017-05-22 02:59:57	-0.131783	2017-04-09 12:30:00	22016	2017-04-05 06:15:00	226.596
2017-05-22 03:59:57	-0.147812	2017-04-09 12:40:00	20736	2017-04-05 06:20:00	226.597
2017-05-22 04:59:57	-0.136848	2017-04-09 12:50:00	20480	2017-04-05 06:25:00	226.596
2017-05-22 05:59:57	-0.099344	2017-04-09 13:00:00	22016	2017-04-05 06:30:00	226.598
2017-05-22 06:59:57	-0.042351	2017-04-09 13:10:00	21248	2017-04-05 06:35:00	226.598
2017-05-22 07:59:57	0.022013	2017-04-09 13:20:00	20736	2017-04-05 06:40:00	226.598
2017-05-22 08:59:57	0.079442	2017-04-09 13:30:00	20352	2017-04-05 06:45:00	226.6
2017-05-22 09:59:57	0.116946	2017-04-09 13:40:00	21248	2017-04-05 06:50:00	226.6
2017-05-22 10:59:57	0.126093	2017-04-09 13:50:00	20736	2017-04-05 06:55:00	226.599
2017-05-22 11:59:57	0.105116	2017-04-09 14:00:00	20736	2017-04-05 07:00:00	226.598
2017-05-22 12:59:57	0.059344	2017-04-09 14:10:00	21760	2017-04-05 07:05:00	226.597
2017-05-22 13:59:57	-0.000163	2017-04-09 14:20:00	19712	2017-04-05 07:10:00	226.596
2017-05-22 14:59:57	-0.05941	2017-04-09 14:30:00	21760	2017-04-05 07:15:00	226.6
2017-05-22 15:59:57	-0.104976	2017-04-09 14:40:00	21248	2017-04-05 07:20:00	226.595
2017-05-22 16:59:57	-0.12733	2017-04-09 14:50:00	20352	2017-04-05 07:25:00	226.598
2017-05-22 17:59:57	-0.12312	2017-04-09 15:00:00	21120	2017-04-05 07:30:00	226.598
2017-05-22 18:59:57	-0.095885	2017-04-09 15:10:00	22784	2017-04-05 07:35:00	226.598
2017-05-22 19:59:57	-0.055015	2017-04-09 15:20:00	20480	2017-04-05 07:40:00	226.598
2017-05-22 20:59:57	-0.013253	2017-04-09 15:30:00	19968	2017-04-05 07:45:00	226.599
2017-05-22 21:59:57	0.016662	2017-04-09 15:40:00	21248	2017-04-05 07:50:00	226.597
2017-05-22 22:59:57	0.025348	2017-04-09 15:50:00	21248	2017-04-05 07:55:00	226.598
2017-05-22 23:59:57	0.009328	2017-04-09 16:00:00	21120	2017-04-05 08:00:00	226.6
2017-05-23 00:59:57	-0.02791	2017-04-09 16:10:00	20736	2017-04-05 08:05:00	226.595
2017-05-23 01:59:57	-0.07662	2017-04-09 16:20:00	19840	2017-04-05 08:10:00	226.598
2017-05-23 02:59:57	-0.123157	2017-04-09 16:30:00	20864	2017-04-05 08:15:00	226.597
2017-05-23 03:59:57	-0.153435	2017-04-09 16:40:00	22016	2017-04-05 08:20:00	226.597
2017-05-23 04:59:57	-0.156644	2017-04-09 16:50:00	19456	2017-04-05 08:25:00	226.596
2017-05-23 05:59:57	-0.128262	2017-04-09 17:00:00	23168	2017-04-05 08:30:00	226.598
2017-05-23 06:59:57	-0.071553	2017-04-09 17:10:00	22016	2017-04-05 08:35:00	226.596
2017-05-23 07:59:57	0.002884	2017-04-09 17:20:00	20352	2017-04-05 08:40:00	226.599
2017-05-23 08:59:57	0.079491	2017-04-09 17:30:00	20608	2017-04-05 08:45:00	226.597
2017-05-23 09:59:57	0.14146	2017-04-09 17:40:00	22016	2017-04-05 08:50:00	226.596
2017-05-23 10:59:57	0.174859	2017-04-09 17:50:00	20736	2017-04-05 08:55:00	226.596
2017-05-23 11:59:57	0.172094	2017-04-09 18:00:00	20224	2017-04-05 09:00:00	226.594
2017-05-23 12:59:57	0.133809	2017-04-09 18:10:00	20480	2017-04-05 09:05:00	226.6
2017-05-23 13:59:57	0.068725	2017-04-09 18:20:00	20352	2017-04-05 09:10:00	226.6
2017-05-23 14:59:57	-0.008548	2017-04-09 18:30:00	22016	2017-04-05 09:15:00	226.599
2017-05-23 15:59:57	-0.08114	2017-04-09 18:40:00	20224	2017-04-05 09:20:00	226.599
2017-05-23 16:59:57	-0.134058	2017-04-09 18:50:00	21376	2017-04-05 09:25:00	226.599
2017-05-23 17:59:57	-0.15778	2017-04-09 19:00:00	21888	2017-04-05 09:30:00	226.601
2017-05-23 18:59:57	-0.150413	2017-04-09 19:10:00	19584	2017-04-05 09:35:00	226.596
2017-05-23 19:59:57	-0.11789	2017-04-09 19:20:00	22272	2017-04-05 09:40:00	226.6
2017-05-23 20:59:57	-0.072213	2017-04-09 19:30:00	20608	2017-04-05 09:45:00	226.599
2017-05-23 21:59:57	-0.02818	2017-04-09 19:40:00	22016	2017-04-05 09:50:00	226.6
2017-05-23 22:59:57	0.00054	2017-04-09 19:50:00	20992	2017-04-05 09:55:00	226.6
2017-05-23 23:59:57	0.005036	2017-04-09 20:00:00	20352	2017-04-05 10:00:00	226.596
2017-05-24 00:59:57	-0.01645	2017-04-09 20:10:00	20608	2017-04-05 10:05:00	226.6
2017-05-24 01:59:57	-0.057948	2017-04-09 20:20:00	22144	2017-04-05 10:10:00	226.601
2017-05-24 02:59:57	-0.107196	2017-04-09 20:30:00	22528	2017-04-05 10:15:00	226.598
2017-05-24 03:59:57	-0.14875	2017-04-09 20:40:00	21888	2017-04-05 10:20:00	226.6
2017-05-24 04:59:57	-0.168026	2017-04-09 20:50:00	20864	2017-04-05 10:25:00	226.599
2017-05-24 05:59:57	-0.155262	2017-04-09 21:00:00	22016	2017-04-05 10:30:00	226.599
2017-05-24 06:59:57	-0.108369	2017-04-09 21:10:00	22144	2017-04-05 10:35:00	226.599
2017-05-24 07:59:57	-0.033896	2017-04-09 21:20:00	21888	2017-04-05 10:40:00	226.601
2017-05-24 08:59:57	0.054199	2017-04-09 21:30:00	20352	2017-04-05 10:45:00	226.598
2017-05-24 09:59:57	0.137724	2017-04-09 21:40:00	22272	2017-04-05 10:50:00	226.598
2017-05-24 10:59:57	0.198609	2017-04-09 21:50:00	21504	2017-04-05 10:55:00	226.6
2017-05-24 11:59:57	0.223317	2017-04-09 22:00:00	22528	2017-04-05 11:00:00	226.601
2017-05-24 12:59:57	0.206198	2017-04-09 22:10:00	20736	2017-04-05 11:05:00	226.601
2017-05-24 13:59:57	0.150888	2017-04-09 22:20:00	21632	2017-04-05 11:10:00	226.601
2017-05-24 14:59:57	0.069405	2017-04-09 22:30:00	22144	2017-04-05 11:15:00	226.6
2017-05-24 15:59:57	-0.020824	2017-04-09 22:40:00	21376	2017-04-05 11:20:00	226.6
2017-05-24 16:59:57	-0.101231	2017-04-09 22:50:00	20864	2017-04-05 11:25:00	226.6
2017-05-24 17:59:57	-0.156572	2017-04-09 23:00:00	23680	2017-04-05 11:30:00	226.599
2017-05-24 18:59:57	-0.17845	2017-04-09 23:10:00	21888	2017-04-05 11:35:00	226.6
2017-05-24 19:59:57	-0.167056	2017-04-09 23:20:00	23296	2017-04-05 11:40:00	226.6
2017-05-24 20:59:57	-0.130708	2017-04-09 23:30:00	20736	2017-04-05 11:45:00	226.599
2017-05-24 21:59:57	-0.083379	2017-04-09 23:40:00	21760	2017-04-05 11:50:00	226.6
2017-05-24 22:59:57	-0.040858	2017-04-09 23:50:00	21248	2017-04-05 11:55:00	226.601
2017-05-24 23:59:57	-0.016528	2017-04-10	21376	2017-04-05 12:00:00	226.6
2017-05-25 00:59:57	-0.017834	2017-04-10 00:10:00	21632	2017-04-05 12:05:00	226.602
2017-05-25 01:59:57	-0.044298	2017-04-10 00:20:00	22016	2017-04-05 12:10:00	226.6
2017-05-25 02:59:57	-0.0876	2017-04-10 00:30:00	20864	2017-04-05 12:15:00	226.601
2017-05-25 03:59:57	-0.13371	2017-04-10 00:40:00	21120	2017-04-05 12:20:00	226.6
2017-05-25 04:59:57	-0.166556	2017-04-10 00:50:00	22656	2017-04-05 12:25:00	226.6
2017-05-25 05:59:57	-0.172327	2017-04-10 01:00:00	20608	2017-04-05 12:30:00	226.598
2017-05-25 06:59:57	-0.143321	2017-04-10 01:10:00	20864	2017-04-05 12:35:00	226.602
2017-05-25 07:59:57	-0.080339	2017-04-10 01:20:00	20736	2017-04-05 12:40:00	226.602
2017-05-25 08:59:57	0.007034	2017-04-10 01:30:00	19840	2017-04-05 12:45:00	226.6
2017-05-25 09:59:57	0.102398	2017-04-10 01:40:00	21760	2017-04-05 12:50:00	226.601
2017-05-25 10:59:57	0.186308	2017-04-10 01:50:00	21504	2017-04-05 12:55:00	226.602
2017-05-25 11:59:57	0.240915	2017-04-10 02:00:00	21760	2017-04-05 13:00:00	226.601
2017-05-25 12:59:57	0.254306	2017-04-10 02:10:00	22656	2017-04-05 13:05:00	226.6
2017-05-25 13:59:57	0.223417	2017-04-10 02:20:00	20608	2017-04-05 13:10:00	226.601
2017-05-25 14:59:57	0.154782	2017-04-10 02:30:00	21120	2017-04-05 13:15:00	226.601
2017-05-25 15:59:57	0.062903	2017-04-10 02:40:00	21632	2017-04-05 13:20:00	226.599
2017-05-25 16:59:57	-0.033296	2017-04-10 02:50:00	21632	2017-04-05 13:25:00	226.598
2017-05-25 17:59:57	-0.11505	2017-04-10 03:00:00	22272	2017-04-05 13:30:00	226.599
2017-05-25 18:59:57	-0.168159	2017-04-10 03:10:00	20608	2017-04-05 13:35:00	226.601
2017-05-25 19:59:57	-0.186139	2017-04-10 03:20:00	20480	2017-04-05 13:40:00	226.601
2017-05-25 20:59:57	-0.171358	2017-04-10 03:30:00	21120	2017-04-05 13:45:00	226.602
2017-05-25 21:59:57	-0.133927	2017-04-10 03:40:00	21248	2017-04-05 13:50:00	226.602
2017-05-25 22:59:57	-0.088695	2017-04-10 03:50:00	19712	2017-04-05 13:55:00	226.598
2017-05-25 23:59:57	-0.051152	2017-04-10 04:00:00	20864	2017-04-05 14:00:00	226.603
2017-05-26 00:59:56	-0.033286	2017-04-10 04:10:00	20352	2017-04-05 14:05:00	226.599
2017-05-26 01:59:56	-0.040436	2017-04-10 04:20:00	20992	2017-04-05 14:10:00	226.601
2017-05-26 02:59:56	-0.06992	2017-04-10 04:30:00	22784	2017-04-05 14:15:00	226.599
2017-05-26 03:59:56	-0.111755	2017-04-10 04:40:00	21376	2017-04-05 14:20:00	226.6
2017-05-26 04:59:56	-0.151307	2017-04-10 04:50:00	20864	2017-04-05 14:25:00	226.596
2017-05-26 05:59:56	-0.173189	2017-04-10 05:00:00	22016	2017-04-05 14:30:00	226.598
2017-05-26 06:59:56	-0.165458	2017-04-10 05:10:00	21376	2017-04-05 14:35:00	226.601
2017-05-26 07:59:56	-0.123026	2017-04-10 05:20:00	21888	2017-04-05 14:40:00	226.6
2017-05-26 08:59:56	-0.049418	2017-04-10 05:30:00	21632	2017-04-05 14:45:00	226.601
2017-05-26 09:59:56	0.043639	2017-04-10 05:40:00	21248	2017-04-05 14:50:00	226.6
2017-05-26 10:59:56	0.138713	2017-04-10 05:50:00	20992	2017-04-05 14:55:00	226.601
2017-05-26 11:59:56	0.216695	2017-04-10 06:00:00	20736	2017-04-05 15:00:00	226.602
2017-05-26 12:59:56	0.261338	2017-04-10 06:10:00	21248	2017-04-05 15:05:00	226.599
2017-05-26 13:59:56	0.263169	2017-04-10 06:20:00	20864	2017-04-05 15:10:00	226.6
2017-05-26 14:59:56	0.221779	2017-04-10 06:30:00	21376	2017-04-05 15:15:00	226.601
2017-05-26 15:59:56	0.145886	2017-04-10 06:40:00	21248	2017-04-05 15:20:00	226.602
2017-05-26 16:59:56	0.051183	2017-04-10 06:50:00	20608	2017-04-05 15:25:00	226.602
2017-05-26 17:59:56	-0.04348	2017-04-10 07:00:00	20480	2017-04-05 15:30:00	226.603
2017-05-26 18:59:56	-0.12058	2017-04-10 07:10:00	20608	2017-04-05 15:35:00	226.603
2017-05-26 19:59:56	-0.167948	2017-04-10 07:20:00	21504	2017-04-05 15:40:00	226.601
2017-05-26 20:59:56	-0.18131	2017-04-10 07:30:00	19456	2017-04-05 15:45:00	226.602
2017-05-26 21:59:56	-0.164798	2017-04-10 07:40:00	19968	2017-04-05 15:50:00	226.603
2017-05-26 22:59:56	-0.129331	2017-04-10 07:50:00	20864	2017-04-05 15:55:00	226.6
2017-05-26 23:59:56	-0.089379	2017-04-10 08:00:00	21248	2017-04-05 16:00:00	226.599
2017-05-27 00:59:56	-0.058964	2017-04-10 08:10:00	21120	2017-04-05 16:05:00	226.602
2017-05-27 01:59:56	-0.04792	2017-04-10 08:20:00	21504	2017-04-05 16:10:00	226.602
2017-05-27 02:59:56	-0.059355	2017-04-10 08:30:00	20992	2017-04-05 16:15:00	226.601
2017-05-27 03:59:56	-0.088913	2017-04-10 08:40:00	20608	2017-04-05 16:20:00	226.602
2017-05-27 04:59:56	-0.125999	2017-04-10 08:50:00	20608	2017-04-05 16:25:00	226.599
2017-05-27 05:59:56	-0.156644	2017-04-10 09:00:00	21888	2017-04-05 16:30:00	226.601
2017-05-27 06:59:56	-0.167286	2017-04-10 09:10:00	20608	2017-04-05 16:35:00	226.602
2017-05-27 07:59:56	-0.148517	2017-04-10 09:20:00	20864	2017-04-05 16:40:00	226.601
2017-05-27 08:59:56	-0.097857	2017-04-10 09:30:00	21504	2017-04-05 16:45:00	226.601
2017-05-27 09:59:56	-0.020826	2017-04-10 09:40:00	22144	2017-04-05 16:50:00	226.6
2017-05-27 10:59:56	0.069984	2017-04-10 09:50:00	20992	2017-04-05 16:55:00	226.602
2017-05-27 11:59:56	0.157656	2017-04-10 10:00:00	22784	2017-04-05 17:00:00	226.6
2017-05-27 12:59:56	0.224842	2017-04-10 10:10:00	22272	2017-04-05 17:05:00	226.601
2017-05-27 13:59:56	0.257864	2017-04-10 10:20:00	21248	2017-04-05 17:10:00	226.601
2017-05-27 14:59:56	0.249966	2017-04-10 10:30:00	20992	2017-04-05 17:15:00	226.602
2017-05-27 15:59:56	0.202911	2017-04-10 10:40:00	22016	2017-04-05 17:20:00	226.601
2017-05-27 16:59:56	0.126507	2017-04-10 10:50:00	22016	2017-04-05 17:25:00	226.601
2017-05-27 17:59:56	0.036197	2017-04-10 11:00:00	22272	2017-04-05 17:30:00	226.602
2017-05-27 18:59:56	-0.050657	2017-04-10 11:10:00	21504	2017-04-05 17:35:00	226.602
2017-05-27 19:59:56	-0.118841	2017-04-10 11:20:00	20992	2017-04-05 17:40:00	226.602
2017-05-27 20:59:56	-0.158671	2017-04-10 11:30:00	21504	2017-04-05 17:45:00	226.6
2017-05-27 21:59:56	-0.16788	2017-04-10 11:40:00	22528	2017-04-05 17:50:00	226.602
2017-05-27 22:59:56	-0.15158	2017-04-10 11:50:00	21376	2017-04-05 17:55:00	226.6
2017-05-27 23:59:56	-0.120403	2017-04-10 12:00:00	23040	2017-04-05 18:00:00	226.6
2017-05-28 00:59:56	-0.087349	2017-04-10 12:10:00	21376	2017-04-05 18:05:00	226.6
2017-05-28 01:59:56	-0.064204	2017-04-10 12:20:00	21760	2017-04-05 18:10:00	226.602
2017-05-28 02:59:56	-0.058429	2017-04-10 12:30:00	21632	2017-04-05 18:15:00	226.6
2017-05-28 03:59:56	-0.071285	2017-04-10 12:40:00	20480	2017-04-05 18:20:00	226.598
2017-05-28 04:59:56	-0.097632	2017-04-10 12:50:00	22784	2017-04-05 18:25:00	226.603
2017-05-28 05:59:56	-0.127408	2017-04-10 13:00:00	20352	2017-04-05 18:30:00	226.602
2017-05-28 06:59:56	-0.148388	2017-04-10 13:10:00	22400	2017-04-05 18:35:00	226.603
2017-05-28 07:59:56	-0.14953	2017-04-10 13:20:00	21504	2017-04-05 18:40:00	226.602
2017-05-28 08:59:56	-0.124072	2017-04-10 13:30:00	20736	2017-04-05 18:45:00	226.602
2017-05-28 09:59:56	-0.071595	2017-04-10 13:40:00	22784	2017-04-05 18:50:00	226.603
2017-05-28 10:59:56	0.001465	2017-04-10 13:50:00	20608	2017-04-05 18:55:00	226.601
2017-05-28 11:59:56	0.083024	2017-04-10 14:00:00	20992	2017-04-05 19:00:00	226.601
2017-05-28 12:59:56	0.157999	2017-04-10 14:10:00	20352	2017-04-05 19:05:00	226.6
2017-05-28 13:59:56	0.211771	2017-04-10 14:20:00	20480	2017-04-05 19:10:00	226.6
2017-05-28 14:59:56	0.2336	2017-04-10 14:30:00	20992	2017-04-05 19:15:00	226.601
2017-05-28 15:59:56	0.219161	2017-04-10 14:40:00	21504	2017-04-05 19:20:00	226.599
2017-05-28 16:59:56	0.171531	2017-04-10 14:50:00	19968	2017-04-05 19:25:00	226.601
2017-05-28 17:59:56	0.100408	2017-04-10 15:00:00	20992	2017-04-05 19:30:00	226.598
2017-05-28 18:59:56	0.019759	2017-04-10 15:10:00	21632	2017-04-05 19:35:00	226.601
2017-05-28 19:59:56	-0.0555	2017-04-10 15:20:00	20480	2017-04-05 19:40:00	226.6
2017-05-28 20:59:56	-0.112915	2017-04-10 15:30:00	19328	2017-04-05 19:45:00	226.599
2017-05-28 21:59:56	-0.145176	2017-04-10 15:40:00	20480	2017-04-05 19:50:00	226.6
2017-05-28 22:59:56	-0.151395	2017-04-10 15:50:00	20992	2017-04-05 19:55:00	226.602
2017-05-28 23:59:56	-0.136756	2017-04-10 16:00:00	20352	2017-04-05 20:00:00	226.6
2017-05-29 00:59:56	-0.110674	2017-04-10 16:10:00	20352	2017-04-05 20:05:00	226.601
2017-05-29 01:59:56	-0.084027	2017-04-10 16:20:00	20480	2017-04-05 20:10:00	226.602
2017-05-29 02:59:56	-0.066178	2017-04-10 16:30:00	21504	2017-04-05 20:15:00	226.6
2017-05-29 03:59:56	-0.062561	2017-04-10 16:40:00	20992	2017-04-05 20:20:00	226.6
2017-05-29 04:59:56	-0.073384	2017-04-10 16:50:00	20864	2017-04-05 20:25:00	226.601
2017-05-29 05:59:56	-0.093747	2017-04-10 17:00:00	19968	2017-04-05 20:30:00	226.598
2017-05-29 06:59:56	-0.115082	2017-04-10 17:10:00	21888	2017-04-05 20:35:00	226.599
2017-05-29 07:59:56	-0.127541	2017-04-10 17:20:00	20352	2017-04-05 20:40:00	226.599
2017-05-29 08:59:56	-0.12271	2017-04-10 17:30:00	20736	2017-04-05 20:45:00	226.599
2017-05-29 09:59:56	-0.096004	2017-04-10 17:40:00	21888	2017-04-05 20:50:00	226.6
2017-05-29 10:59:56	-0.048121	2017-04-10 17:50:00	21376	2017-04-05 20:55:00	226.6
2017-05-29 11:59:56	0.014781	2017-04-10 18:00:00	22912	2017-04-05 21:00:00	226.601
2017-05-29 12:59:56	0.08228	2017-04-10 18:10:00	21760	2017-04-05 21:05:00	226.6
2017-05-29 13:59:56	0.141961	2017-04-10 18:20:00	21120	2017-04-05 21:10:00	226.6
2017-05-29 14:59:56	0.182248	2017-04-10 18:30:00	20096	2017-04-05 21:15:00	226.601
2017-05-29 15:59:56	0.195094	2017-04-10 18:40:00	21376	2017-04-05 21:20:00	226.6
2017-05-29 16:59:56	0.17786	2017-04-10 18:50:00	21120	2017-04-05 21:25:00	226.6
2017-05-29 17:59:56	0.133926	2017-04-10 19:00:00	20864	2017-04-05 21:30:00	226.601
2017-05-29 18:59:56	0.071864	2017-04-10 19:10:00	21888	2017-04-05 21:35:00	226.598
2017-05-29 19:59:56	0.003402	2017-04-10 19:20:00	21632	2017-04-05 21:40:00	226.601
2017-05-29 20:59:56	-0.059302	2017-04-10 19:30:00	21248	2017-04-05 21:45:00	226.6
2017-05-29 21:59:56	-0.106374	2017-04-10 19:40:00	19840	2017-04-05 21:50:00	226.601
2017-05-29 22:59:56	-0.13227	2017-04-10 19:50:00	21888	2017-04-05 21:55:00	226.601
2017-05-29 23:59:56	-0.136656	2017-04-10 20:00:00	22144	2017-04-05 22:00:00	226.599
2017-05-30 00:59:56	-0.123985	2017-04-10 20:10:00	20736	2017-04-05 22:05:00	226.601
2017-05-30 01:59:56	-0.101943	2017-04-10 20:20:00	20992	2017-04-05 22:10:00	226.602
2017-05-30 02:59:56	-0.079208	2017-04-10 20:30:00	22272	2017-04-05 22:15:00	226.6
2017-05-30 03:59:56	-0.06314	2017-04-10 20:40:00	22016	2017-04-05 22:20:00	226.602
2017-05-30 04:59:56	-0.057946	2017-04-10 20:50:00	20864	2017-04-05 22:25:00	226.599
2017-05-30 05:59:56	-0.06376	2017-04-10 21:00:00	21376	2017-04-05 22:30:00	226.601
2017-05-30 06:59:56	-0.076808	2017-04-10 21:10:00	22016	2017-04-05 22:35:00	226.603
2017-05-30 07:59:56	-0.090561	2017-04-10 21:20:00	21760	2017-04-05 22:40:00	226.603
2017-05-30 08:59:56	-0.097583	2017-04-10 21:30:00	20736	2017-04-05 22:45:00	226.603
2017-05-30 09:59:56	-0.091591	2017-04-10 21:40:00	21760	2017-04-05 22:50:00	226.601
2017-05-30 10:59:56	-0.069252	2017-04-10 21:50:00	21632	2017-04-05 22:55:00	226.602
2017-05-30 11:59:56	-0.031265	2017-04-10 22:00:00	20224	2017-04-05 23:00:00	226.599
2017-05-30 12:59:56	0.01753	2017-04-10 22:10:00	20736	2017-04-05 23:05:00	226.6
2017-05-30 13:59:56	0.069065	2017-04-10 22:20:00	21504	2017-04-05 23:10:00	226.6
2017-05-30 14:59:56	0.11379	2017-04-10 22:30:00	23552	2017-04-05 23:15:00	226.603
2017-05-30 15:59:56	0.142833	2017-04-10 22:40:00	19968	2017-04-05 23:20:00	226.6
2017-05-30 16:59:56	0.150068	2017-04-10 22:50:00	20352	2017-04-05 23:25:00	226.601
2017-05-30 17:59:56	0.133572	2017-04-10 23:00:00	21632	2017-04-05 23:30:00	226.601
2017-05-30 18:59:56	0.096106	2017-04-10 23:10:00	22784	2017-04-05 23:35:00	226.602
2017-05-30 19:59:56	0.044498	2017-04-10 23:20:00	21632	2017-04-05 23:40:00	226.604
2017-05-30 20:59:56	-0.011925	2017-04-10 23:30:00	22528	2017-04-05 23:45:00	226.602
2017-05-30 21:59:56	-0.063441	2017-04-10 23:40:00	21632	2017-04-05 23:50:00	226.601
2017-05-30 22:59:56	-0.10206	2017-04-10 23:50:00	21504	2017-04-05 23:55:00	226.604
2017-05-30 23:59:56	-0.123134	2017-04-11	22272	2017-04-06	226.601
2017-05-31 00:59:56	-0.126108	2017-04-11 00:10:00	21760	2017-04-06 00:05:00	226.602
2017-05-31 01:59:56	-0.114253	2017-04-11 00:20:00	21888	2017-04-06 00:10:00	226.602
2017-05-31 02:59:56	-0.093536	2017-04-11 00:30:00	22656	2017-04-06 00:15:00	226.601
2017-05-31 03:59:56	-0.070944	2017-04-11 00:40:00	22528	2017-04-06 00:20:00	226.604
2017-05-31 04:59:56	-0.052697	2017-04-11 00:50:00	21888	2017-04-06 00:25:00	226.6
2017-05-31 05:59:56	-0.042792	2017-04-11 01:00:00	21760	2017-04-06 00:30:00	226.603
2017-05-31 06:59:56	-0.04217	2017-04-11 01:10:00	21120	2017-04-06 00:35:00	226.603
2017-05-31 07:59:56	-0.048687	2017-04-11 01:20:00	22400	2017-04-06 00:40:00	226.602
2017-05-31 08:59:56	-0.057832	2017-04-11 01:30:00	23296	2017-04-06 00:45:00	226.602
2017-05-31 09:59:56	-0.064019	2017-04-11 01:40:00	21632	2017-04-06 00:50:00	226.602
2017-05-31 10:59:56	-0.062124	2017-04-11 01:50:00	21376	2017-04-06 00:55:00	226.601
2017-05-31 11:59:56	-0.04893	2017-04-11 02:00:00	23040	2017-04-06 01:00:00	226.601
2017-05-31 12:59:56	-0.024121	2017-04-11 02:10:00	21632	2017-04-06 01:05:00	226.601
2017-05-31 13:59:56	0.009412	2017-04-11 02:20:00	21120	2017-04-06 01:10:00	226.603
2017-05-31 14:59:56	0.046062	2017-04-11 02:30:00	22144	2017-04-06 01:15:00	226.603
2017-05-31 15:59:56	0.078694	2017-04-11 02:40:00	21248	2017-04-06 01:20:00	226.603
2017-05-31 16:59:56	0.100277	2017-04-11 02:50:00	22272	2017-04-06 01:25:00	226.604
2017-05-31 17:59:56	0.105562	2017-04-11 03:00:00	21376	2017-04-06 01:30:00	226.604
2017-05-31 18:59:56	0.0924	2017-04-11 03:10:00	22272	2017-04-06 01:35:00	226.601
2017-05-31 19:59:56	0.062342	2017-04-11 03:20:00	21632	2017-04-06 01:40:00	226.603
2017-05-31 20:59:56	0.020379	2017-04-11 03:30:00	21376	2017-04-06 01:45:00	226.601
2017-05-31 21:59:56	-0.026143	2017-04-11 03:40:00	20352	2017-04-06 01:50:00	226.602
2017-05-31 22:59:56	-0.069138	2017-04-11 03:50:00	20992	2017-04-06 01:55:00	226.603
2017-06-01	-0.101537	2017-04-11 04:00:00	21248	2017-04-06 02:00:00	226.602
2017-06-01 01:00:00	-0.118752	2017-04-11 04:10:00	22528	2017-04-06 02:05:00	226.603
2017-06-01 02:00:00	-0.119523	2017-04-11 04:20:00	21632	2017-04-06 02:10:00	226.603
2017-06-01 03:00:00	-0.105965	2017-04-11 04:30:00	21248	2017-04-06 02:15:00	226.601
2017-06-01 03:59:59	-0.082869	2017-04-11 04:40:00	22656	2017-04-06 02:20:00	226.605
2017-06-01 04:59:59	-0.056448	2017-04-11 04:50:00	21504	2017-04-06 02:25:00	226.603
2017-06-01 05:59:59	-0.032854	2017-04-11 05:00:00	21504	2017-04-06 02:30:00	226.605
2017-06-01 06:59:59	-0.016789	2017-04-11 05:10:00	21888	2017-04-06 02:35:00	226.601
2017-06-01 07:59:59	-0.010524	2017-04-11 05:20:00	21120	2017-04-06 02:40:00	226.606
2017-06-01 08:59:59	-0.013512	2017-04-11 05:30:00	22144	2017-04-06 02:45:00	226.602
2017-06-01 09:59:59	-0.022666	2017-04-11 05:40:00	19584	2017-04-06 02:50:00	226.605
2017-06-01 10:59:59	-0.03323	2017-04-11 05:50:00	22272	2017-04-06 02:55:00	226.603
2017-06-01 11:59:59	-0.040056	2017-04-11 06:00:00	20864	2017-04-06 03:00:00	226.604
2017-06-01 12:59:59	-0.038995	2017-04-11 06:10:00	21888	2017-04-06 03:05:00	226.605
2017-06-01 13:59:59	-0.028072	2017-04-11 06:20:00	21248	2017-04-06 03:10:00	226.604
2017-06-01 14:59:59	-0.008148	2017-04-11 06:30:00	20864	2017-04-06 03:15:00	226.603
2017-06-01 15:59:59	0.017129	2017-04-11 06:40:00	20992	2017-04-06 03:20:00	226.606
2017-06-01 16:59:59	0.042096	2017-04-11 06:50:00	21120	2017-04-06 03:25:00	226.605
2017-06-01 17:59:59	0.060434	2017-04-11 07:00:00	21120	2017-04-06 03:30:00	226.604
2017-06-01 18:59:59	0.066754	2017-04-11 07:10:00	21120	2017-04-06 03:35:00	226.604
2017-06-01 19:59:59	0.058033	2017-04-11 07:20:00	20992	2017-04-06 03:40:00	226.604
2017-06-01 20:59:59	0.034503	2017-04-11 07:30:00	22144	2017-04-06 03:45:00	226.606
2017-06-01 21:59:59	-0.000247	2017-04-11 07:40:00	21376	2017-04-06 03:50:00	226.601
2017-06-01 22:59:59	-0.039996	2017-04-11 07:50:00	19584	2017-04-06 03:55:00	226.604
2017-06-01 23:59:59	-0.077264	2017-04-11 08:00:00	20352	2017-04-06 04:00:00	226.601
2017-06-02 00:59:59	-0.104985	2017-04-11 08:10:00	20480	2017-04-06 04:05:00	226.605
2017-06-02 01:59:59	-0.118086	2017-04-11 08:20:00	22016	2017-04-06 04:10:00	226.603
2017-06-02 02:59:59	-0.114577	2017-04-11 08:30:00	22016	2017-04-06 04:15:00	226.605
2017-06-02 03:59:59	-0.095937	2017-04-11 08:40:00	22144	2017-04-06 04:20:00	226.602
2017-06-02 04:59:59	-0.066704	2017-04-11 08:50:00	21376	2017-04-06 04:25:00	226.606
2017-06-02 05:59:59	-0.03341	2017-04-11 09:00:00	21376	2017-04-06 04:30:00	226.606
2017-06-02 06:59:59	-0.003087	2017-04-11 09:10:00	21120	2017-04-06 04:35:00	226.605
2017-06-02 07:59:59	0.0183	2017-04-11 09:20:00	21248	2017-04-06 04:40:00	226.604
2017-06-02 08:59:59	0.027158	2017-04-11 09:30:00	22528	2017-04-06 04:45:00	226.605
2017-06-02 09:59:59	0.023024	2017-04-11 09:40:00	21504	2017-04-06 04:50:00	226.604
2017-06-02 10:59:59	0.008594	2017-04-11 09:50:00	23296	2017-04-06 04:55:00	226.604
2017-06-02 11:59:59	-0.010997	2017-04-11 10:00:00	22400	2017-04-06 05:00:00	226.603
2017-06-02 12:59:59	-0.029488	2017-04-11 10:10:00	21760	2017-04-06 05:05:00	226.602
2017-06-02 13:59:59	-0.041119	2017-04-11 10:20:00	21248	2017-04-06 05:10:00	226.605
2017-06-02 14:59:59	-0.042156	2017-04-11 10:30:00	21248	2017-04-06 05:15:00	226.603
2017-06-02 15:59:59	-0.031933	2017-04-11 10:40:00	21248	2017-04-06 05:20:00	226.606
2017-06-02 16:59:59	-0.013111	2017-04-11 10:50:00	20992	2017-04-06 05:25:00	226.603
2017-06-02 17:59:59	0.008941	2017-04-11 11:00:00	23296	2017-04-06 05:30:00	226.607
2017-06-02 18:59:59	0.027529	2017-04-11 11:10:00	21376	2017-04-06 05:35:00	226.602
2017-06-02 19:59:59	0.036412	2017-04-11 11:20:00	20736	2017-04-06 05:40:00	226.603
2017-06-02 20:59:59	0.031527	2017-04-11 11:30:00	22528	2017-04-06 05:45:00	226.605
2017-06-02 21:59:59	0.012192	2017-04-11 11:40:00	20608	2017-04-06 05:50:00	226.602
2017-06-02 22:59:59	-0.018558	2017-04-11 11:50:00	21760	2017-04-06 05:55:00	226.605
2017-06-02 23:59:59	-0.054577	2017-04-11 12:00:00	21632	2017-04-06 06:00:00	226.6
2017-06-03 00:59:59	-0.088028	2017-04-11 12:10:00	22144	2017-04-06 06:05:00	226.606
2017-06-03 01:59:59	-0.111249	2017-04-11 12:20:00	20224	2017-04-06 06:10:00	226.604
2017-06-03 02:59:59	-0.118596	2017-04-11 12:30:00	22144	2017-04-06 06:15:00	226.604
2017-06-03 03:59:59	-0.107822	2017-04-11 12:40:00	22400	2017-04-06 06:20:00	226.602
2017-06-03 04:59:59	-0.080661	2017-04-11 12:50:00	21504	2017-04-06 06:25:00	226.604
2017-06-03 05:59:59	-0.042477	2017-04-11 13:00:00	22784	2017-04-06 06:30:00	226.605
2017-06-03 06:59:59	-0.001076	2017-04-11 13:10:00	20608	2017-04-06 06:35:00	226.602
2017-06-03 07:59:59	0.035051	2017-04-11 13:20:00	21888	2017-04-06 06:40:00	226.605
2017-06-03 08:59:59	0.058655	2017-04-11 13:30:00	21760	2017-04-06 06:45:00	226.603
2017-06-03 09:59:59	0.065389	2017-04-11 13:40:00	21504	2017-04-06 06:50:00	226.606
2017-06-03 10:59:59	0.054795	2017-04-11 13:50:00	20736	2017-04-06 06:55:00	226.605
2017-06-03 11:59:59	0.030392	2017-04-11 14:00:00	20864	2017-04-06 07:00:00	226.605
2017-06-03 12:59:59	-0.0012	2017-04-11 14:10:00	20992	2017-04-06 07:05:00	226.606
2017-06-03 13:59:59	-0.031907	2017-04-11 14:20:00	22016	2017-04-06 07:10:00	226.603
2017-06-03 14:59:59	-0.054231	2017-04-11 14:30:00	21376	2017-04-06 07:15:00	226.605
2017-06-03 15:59:59	-0.063162	2017-04-11 14:40:00	21760	2017-04-06 07:20:00	226.601
2017-06-03 16:59:59	-0.057474	2017-04-11 14:50:00	20224	2017-04-06 07:25:00	226.604
2017-06-03 17:59:59	-0.040038	2017-04-11 15:00:00	21248	2017-04-06 07:30:00	226.605
2017-06-03 18:59:59	-0.017041	2017-04-11 15:10:00	20608	2017-04-06 07:35:00	226.604
2017-06-03 19:59:59	0.003691	2017-04-11 15:20:00	20224	2017-04-06 07:40:00	226.605
2017-06-03 20:59:59	0.014852	2017-04-11 15:30:00	20480	2017-04-06 07:45:00	226.604
2017-06-03 21:59:59	0.011707	2017-04-11 15:40:00	20992	2017-04-06 07:50:00	226.602
2017-06-03 22:59:59	-0.006527	2017-04-11 15:50:00	20480	2017-04-06 07:55:00	226.607
2017-06-03 23:59:59	-0.036324	2017-04-11 16:00:00	21888	2017-04-06 08:00:00	226.603
2017-06-04 00:59:59	-0.070645	2017-04-11 16:10:00	21504	2017-04-06 08:05:00	226.606
2017-06-04 01:59:59	-0.100672	2017-04-11 16:20:00	21376	2017-04-06 08:10:00	226.606
2017-06-04 02:59:59	-0.118027	2017-04-11 16:30:00	22400	2017-04-06 08:15:00	226.604
2017-06-04 03:59:59	-0.116931	2017-04-11 16:40:00	21504	2017-04-06 08:20:00	226.604
2017-06-04 04:59:59	-0.095734	2017-04-11 16:50:00	20864	2017-04-06 08:25:00	226.604
2017-06-04 05:59:59	-0.057473	2017-04-11 17:00:00	20096	2017-04-06 08:30:00	226.606
2017-06-04 06:59:59	-0.009281	2017-04-11 17:10:00	22272	2017-04-06 08:35:00	226.604
2017-06-04 07:59:59	0.03918	2017-04-11 17:20:00	20736	2017-04-06 08:40:00	226.603
2017-06-04 08:59:59	0.077933	2017-04-11 17:30:00	21632	2017-04-06 08:45:00	226.605
2017-06-04 09:59:59	0.098996	2017-04-11 17:40:00	21376	2017-04-06 08:50:00	226.606
2017-06-04 10:59:59	0.098264	2017-04-11 17:50:00	20736	2017-04-06 08:55:00	226.604
2017-06-04 11:59:59	0.076492	2017-04-11 18:00:00	21504	2017-04-06 09:00:00	226.606
2017-06-04 12:59:59	0.039122	2017-04-11 18:10:00	20992	2017-04-06 09:05:00	226.607
2017-06-04 13:59:59	-0.005034	2017-04-11 18:20:00	22272	2017-04-06 09:10:00	226.603
2017-06-04 14:59:59	-0.045947	2017-04-11 18:30:00	20736	2017-04-06 09:15:00	226.605
2017-06-04 15:59:59	-0.074851	2017-04-11 18:40:00	20992	2017-04-06 09:20:00	226.605
2017-06-04 16:59:59	-0.086422	2017-04-11 18:50:00	20992	2017-04-06 09:25:00	226.605
2017-06-04 17:59:59	-0.080065	2017-04-11 19:00:00	20736	2017-04-06 09:30:00	226.606
2017-06-04 18:59:59	-0.059982	2017-04-11 19:10:00	21504	2017-04-06 09:35:00	226.608
2017-06-04 19:59:59	-0.033953	2017-04-11 19:20:00	22016	2017-04-06 09:40:00	226.607
2017-06-04 20:59:59	-0.011165	2017-04-11 19:30:00	21632	2017-04-06 09:45:00	226.604
2017-06-04 21:59:59	0.000354	2017-04-11 19:40:00	22400	2017-04-06 09:50:00	226.607
2017-06-04 22:59:59	-0.004011	2017-04-11 19:50:00	22528	2017-04-06 09:55:00	226.606
2017-06-04 23:59:59	-0.024108	2017-04-11 20:00:00	20224	2017-04-06 10:00:00	226.606
2017-06-05 00:59:59	-0.054965	2017-04-11 20:10:00	22144	2017-04-06 10:05:00	226.605
2017-06-05 01:59:59	-0.088021	2017-04-11 20:20:00	20864	2017-04-06 10:10:00	226.603
2017-06-05 02:59:59	-0.113353	2017-04-11 20:30:00	21504	2017-04-06 10:15:00	226.605
2017-06-05 03:59:59	-0.122284	2017-04-11 20:40:00	23296	2017-04-06 10:20:00	226.607
2017-06-05 04:59:59	-0.109736	2017-04-11 20:50:00	21376	2017-04-06 10:25:00	226.607
2017-06-05 05:59:59	-0.075687	2017-04-11 21:00:00	22400	2017-04-06 10:30:00	226.606
2017-06-05 06:59:59	-0.025409	2017-04-11 21:10:00	22272	2017-04-06 10:35:00	226.607
2017-06-05 07:59:59	0.031629	2017-04-11 21:20:00	22528	2017-04-06 10:40:00	226.606
2017-06-05 08:59:59	0.083888	2017-04-11 21:30:00	22528	2017-04-06 10:45:00	226.607
2017-06-05 09:59:59	0.120449	2017-04-11 21:40:00	22656	2017-04-06 10:50:00	226.604
2017-06-05 10:59:59	0.133593	2017-04-11 21:50:00	22400	2017-04-06 10:55:00	226.603
2017-06-05 11:59:59	0.120658	2017-04-11 22:00:00	21760	2017-04-06 11:00:00	226.607
2017-06-05 12:59:59	0.084706	2017-04-11 22:10:00	21504	2017-04-06 11:05:00	226.606
2017-06-05 13:59:59	0.033811	2017-04-11 22:20:00	22144	2017-04-06 11:10:00	226.607
2017-06-05 14:59:59	-0.02088	2017-04-11 22:30:00	22528	2017-04-06 11:15:00	226.607
2017-06-05 15:59:59	-0.067855	2017-04-11 22:40:00	21632	2017-04-06 11:20:00	226.606
2017-06-05 16:59:59	-0.098042	2017-04-11 22:50:00	21888	2017-04-06 11:25:00	226.604
2017-06-05 17:59:59	-0.106994	2017-04-11 23:00:00	21760	2017-04-06 11:30:00	226.607
2017-06-05 18:59:59	-0.095882	2017-04-11 23:10:00	21760	2017-04-06 11:35:00	226.607
2017-06-05 19:59:59	-0.071009	2017-04-11 23:20:00	21120	2017-04-06 11:40:00	226.609
2017-06-05 20:59:59	-0.041987	2017-04-11 23:30:00	20608	2017-04-06 11:45:00	226.607
2017-06-05 21:59:59	-0.019023	2017-04-11 23:40:00	22016	2017-04-06 11:50:00	226.607
2017-06-05 22:59:59	-0.010068	2017-04-11 23:50:00	21632	2017-04-06 11:55:00	226.606
2017-06-05 23:59:59	-0.018581	2017-04-12	21632	2017-04-06 12:00:00	226.606
2017-06-06 00:59:59	-0.04252	2017-04-12 00:10:00	22400	2017-04-06 12:05:00	226.608
2017-06-06 01:59:59	-0.074837	2017-04-12 00:20:00	21760	2017-04-06 12:10:00	226.608
2017-06-06 02:59:59	-0.105333	2017-04-12 00:30:00	20864	2017-04-06 12:15:00	226.607
2017-06-06 03:59:59	-0.123396	2017-04-12 00:40:00	22784	2017-04-06 12:20:00	226.608
2017-06-06 04:59:59	-0.120899	2017-04-12 00:50:00	21760	2017-04-06 12:25:00	226.608
2017-06-06 05:59:59	-0.094493	2017-04-12 01:00:00	20480	2017-04-06 12:30:00	226.609
2017-06-06 06:59:59	-0.046718	2017-04-12 01:10:00	23040	2017-04-06 12:35:00	226.611
2017-06-06 07:59:59	0.014358	2017-04-12 01:20:00	22528	2017-04-06 12:40:00	226.611
2017-06-06 08:59:59	0.076911	2017-04-12 01:30:00	21760	2017-04-06 12:45:00	226.61
2017-06-06 09:59:59	0.128078	2017-04-12 01:40:00	21888	2017-04-06 12:50:00	226.607
2017-06-06 10:59:59	0.157003	2017-04-12 01:50:00	20864	2017-04-06 12:55:00	226.607
2017-06-06 11:59:59	0.157437	2017-04-12 02:00:00	22272	2017-04-06 13:00:00	226.608
2017-06-06 12:59:59	0.129265	2017-04-12 02:10:00	22144	2017-04-06 13:05:00	226.607
2017-06-06 13:59:59	0.078574	2017-04-12 02:20:00	22016	2017-04-06 13:10:00	226.609
2017-06-06 14:59:59	0.016208	2017-04-12 02:30:00	21248	2017-04-06 13:15:00	226.609
2017-06-06 15:59:59	-0.044828	2017-04-12 02:40:00	21504	2017-04-06 13:20:00	226.607
2017-06-06 16:59:59	-0.09251	2017-04-12 02:50:00	21248	2017-04-06 13:25:00	226.614
2017-06-06 17:59:59	-0.118671	2017-04-12 03:00:00	23168	2017-04-06 13:30:00	226.609
2017-06-06 18:59:59	-0.120888	2017-04-12 03:10:00	20736	2017-04-06 13:35:00	226.611
2017-06-06 19:59:59	-0.102878	2017-04-12 03:20:00	21504	2017-04-06 13:40:00	226.609
2017-06-06 20:59:59	-0.073291	2017-04-12 03:30:00	21120	2017-04-06 13:45:00	226.61
2017-06-06 21:59:59	-0.043217	2017-04-12 03:40:00	21120	2017-04-06 13:50:00	226.609
2017-06-06 22:59:59	-0.023067	2017-04-12 03:50:00	22016	2017-04-06 13:55:00	226.612
2017-06-06 23:59:59	-0.019663	2017-04-12 04:00:00	20736	2017-04-06 14:00:00	226.608
2017-06-07 00:59:59	-0.034331	2017-04-12 04:10:00	21120	2017-04-06 14:05:00	226.608
2017-06-07 01:59:59	-0.0625	2017-04-12 04:20:00	21376	2017-04-06 14:10:00	226.608
2017-06-07 02:59:59	-0.094923	2017-04-12 04:30:00	22016	2017-04-06 14:15:00	226.611
2017-06-07 03:59:59	-0.120193	2017-04-12 04:40:00	20224	2017-04-06 14:20:00	226.61
2017-06-07 04:59:59	-0.127876	2017-04-12 04:50:00	21632	2017-04-06 14:25:00	226.61
2017-06-07 05:59:59	-0.111444	2017-04-12 05:00:00	20992	2017-04-06 14:30:00	226.607
2017-06-07 06:59:59	-0.070234	2017-04-12 05:10:00	20096	2017-04-06 14:35:00	226.607
2017-06-07 07:59:59	-0.009924	2017-04-12 05:20:00	22528	2017-04-06 14:40:00	226.607
2017-06-07 08:59:59	0.058601	2017-04-12 05:30:00	21888	2017-04-06 14:45:00	226.608
2017-06-07 09:59:59	0.121717	2017-04-12 05:40:00	22656	2017-04-06 14:50:00	226.609
2017-06-07 10:59:59	0.166259	2017-04-12 05:50:00	20224	2017-04-06 14:55:00	226.609
2017-06-07 11:59:59	0.182661	2017-04-12 06:00:00	20480	2017-04-06 15:00:00	226.608
2017-06-07 12:59:59	0.167269	2017-04-12 06:10:00	21120	2017-04-06 15:05:00	226.611
2017-06-07 13:59:59	0.123253	2017-04-12 06:20:00	20352	2017-04-06 15:10:00	226.609
2017-06-07 14:59:59	0.059869	2017-04-12 06:30:00	21632	2017-04-06 15:15:00	226.608
2017-06-07 15:59:59	-0.009741	2017-04-12 06:40:00	20864	2017-04-06 15:20:00	226.605
2017-06-07 16:59:59	-0.0717	2017-04-12 06:50:00	20864	2017-04-06 15:25:00	226.609
2017-06-07 17:59:59	-0.114704	2017-04-12 07:00:00	22016	2017-04-06 15:30:00	226.607
2017-06-07 18:59:59	-0.132663	2017-04-12 07:10:00	20736	2017-04-06 15:35:00	226.61
2017-06-07 19:59:59	-0.125986	2017-04-12 07:20:00	21504	2017-04-06 15:40:00	226.608
2017-06-07 20:59:59	-0.101192	2017-04-12 07:30:00	21760	2017-04-06 15:45:00	226.606
2017-06-07 21:59:59	-0.068925	2017-04-12 07:40:00	21376	2017-04-06 15:50:00	226.607
2017-06-07 22:59:59	-0.040917	2017-04-12 07:50:00	21376	2017-04-06 15:55:00	226.606
2017-06-07 23:59:59	-0.026702	2017-04-12 08:00:00	22144	2017-04-06 16:00:00	226.606
2017-06-08 00:59:59	-0.030962	2017-04-12 08:10:00	20352	2017-04-06 16:05:00	226.607
2017-06-08 01:59:59	-0.052218	2017-04-12 08:20:00	22784	2017-04-06 16:10:00	226.606
2017-06-08 02:59:59	-0.083233	2017-04-12 08:30:00	20224	2017-04-06 16:15:00	226.603
2017-06-08 03:59:59	-0.112995	2017-04-12 08:40:00	21120	2017-04-06 16:20:00	226.608
2017-06-08 04:59:59	-0.12977	2017-04-12 08:50:00	22016	2017-04-06 16:25:00	226.608
2017-06-08 05:59:59	-0.124385	2017-04-12 09:00:00	21376	2017-04-06 16:30:00	226.608
2017-06-08 06:59:59	-0.092904	2017-04-12 09:10:00	21504	2017-04-06 16:35:00	226.609
2017-06-08 07:59:59	-0.037955	2017-04-12 09:20:00	20224	2017-04-06 16:40:00	226.607
2017-06-08 08:59:59	0.031598	2017-04-12 09:30:00	20736	2017-04-06 16:45:00	226.608
2017-06-08 09:59:59	0.102603	2017-04-12 09:40:00	20480	2017-04-06 16:50:00	226.604
2017-06-08 10:59:59	0.160665	2017-04-12 09:50:00	22784	2017-04-06 16:55:00	226.606
2017-06-08 11:59:59	0.193565	2017-04-12 10:00:00	21120	2017-04-06 17:00:00	226.604
2017-06-08 12:59:59	0.194186	2017-04-12 10:10:00	21632	2017-04-06 17:05:00	226.606
2017-06-08 13:59:59	0.162238	2017-04-12 10:20:00	22144	2017-04-06 17:10:00	226.605
2017-06-08 14:59:59	0.104346	2017-04-12 10:30:00	21632	2017-04-06 17:15:00	226.605
2017-06-08 15:59:59	0.03248	2017-04-12 10:40:00	21376	2017-04-06 17:20:00	226.605
2017-06-08 16:59:59	-0.03891	2017-04-12 10:50:00	21248	2017-04-06 17:25:00	226.607
2017-06-08 17:59:59	-0.096325	2017-04-12 11:00:00	20096	2017-04-06 17:30:00	226.609
2017-06-08 18:59:59	-0.130384	2017-04-12 11:10:00	22016	2017-04-06 17:35:00	226.607
2017-06-08 19:59:59	-0.137916	2017-04-12 11:20:00	22784	2017-04-06 17:40:00	226.603
2017-06-08 20:59:59	-0.122447	2017-04-12 11:30:00	21888	2017-04-06 17:45:00	226.605
2017-06-08 21:59:59	-0.092955	2017-04-12 11:40:00	21888	2017-04-06 17:50:00	226.607
2017-06-08 22:59:59	-0.061236	2017-04-12 11:50:00	22016	2017-04-06 17:55:00	226.606
2017-06-08 23:59:59	-0.038564	2017-04-12 12:00:00	21760	2017-04-06 18:00:00	226.607
2017-06-09 00:59:59	-0.032542	2017-04-12 12:10:00	21760	2017-04-06 18:05:00	226.603
2017-06-09 01:59:59	-0.044999	2017-04-12 12:20:00	22016	2017-04-06 18:10:00	226.605
2017-06-09 02:59:59	-0.071485	2017-04-12 12:30:00	22400	2017-04-06 18:15:00	226.606
2017-06-09 03:59:59	-0.102513	2017-04-12 12:40:00	21120	2017-04-06 18:20:00	226.607
2017-06-09 04:59:59	-0.126194	2017-04-12 12:50:00	20096	2017-04-06 18:25:00	226.607
2017-06-09 05:59:59	-0.131577	2017-04-12 13:00:00	21120	2017-04-06 18:30:00	226.605
2017-06-09 06:59:59	-0.111785	2017-04-12 13:10:00	21120	2017-04-06 18:35:00	226.605
2017-06-09 07:59:59	-0.066121	2017-04-12 13:20:00	21120	2017-04-06 18:40:00	226.604
2017-06-09 08:59:58	-0.000595	2017-04-12 13:30:00	21760	2017-04-06 18:45:00	226.605
2017-06-09 09:59:58	0.073274	2017-04-12 13:40:00	20224	2017-04-06 18:50:00	226.604
2017-06-09 10:59:58	0.141088	2017-04-12 13:50:00	20736	2017-04-06 18:55:00	226.604
2017-06-09 11:59:58	0.188947	2017-04-12 14:00:00	21632	2017-04-06 19:00:00	226.603
2017-06-09 12:59:58	0.206765	2017-04-12 14:10:00	20352	2017-04-06 19:05:00	226.602
2017-06-09 13:59:58	0.190681	2017-04-12 14:20:00	19712	2017-04-06 19:10:00	226.603
2017-06-09 14:59:58	0.143985	2017-04-12 14:30:00	21376	2017-04-06 19:15:00	226.605
2017-06-09 15:59:58	0.076327	2017-04-12 14:40:00	22016	2017-04-06 19:20:00	226.605
2017-06-09 16:59:58	0.001416	2017-04-12 14:50:00	19712	2017-04-06 19:25:00	226.605
2017-06-09 17:59:58	-0.066242	2017-04-12 15:00:00	21120	2017-04-06 19:30:00	226.603
2017-06-09 18:59:58	-0.114752	2017-04-12 15:10:00	20992	2017-04-06 19:35:00	226.605
2017-06-09 19:59:58	-0.137537	2017-04-12 15:20:00	21888	2017-04-06 19:40:00	226.606
2017-06-09 20:59:58	-0.134661	2017-04-12 15:30:00	21248	2017-04-06 19:45:00	226.604
2017-06-09 21:59:58	-0.112457	2017-04-12 15:40:00	19840	2017-04-06 19:50:00	226.603
2017-06-09 22:59:58	-0.081535	2017-04-12 15:50:00	21504	2017-04-06 19:55:00	226.604
2017-06-09 23:59:58	-0.053732	2017-04-12 16:00:00	20864	2017-04-06 20:00:00	226.606
2017-06-10 00:59:58	-0.038776	2017-04-12 16:10:00	21120	2017-04-06 20:05:00	226.606
2017-06-10 01:59:58	-0.041595	2017-04-12 16:20:00	20352	2017-04-06 20:10:00	226.603
2017-06-10 02:59:58	-0.060954	2017-04-12 16:30:00	19840	2017-04-06 20:15:00	226.605
2017-06-10 03:59:58	-0.089822	2017-04-12 16:40:00	21120	2017-04-06 20:20:00	226.606
2017-06-10 04:59:58	-0.117338	2017-04-12 16:50:00	20352	2017-04-06 20:25:00	226.607
2017-06-10 05:59:58	-0.131861	2017-04-12 17:00:00	19456	2017-04-06 20:30:00	226.605
2017-06-10 06:59:58	-0.124286	2017-04-12 17:10:00	20608	2017-04-06 20:35:00	226.605
2017-06-10 07:59:58	-0.090725	2017-04-12 17:20:00	21888	2017-04-06 20:40:00	226.603
2017-06-10 08:59:58	-0.033856	2017-04-12 17:30:00	20608	2017-04-06 20:45:00	226.605
2017-06-10 09:59:58	0.03742	2017-04-12 17:40:00	21120	2017-04-06 20:50:00	226.606
2017-06-10 10:59:58	0.109933	2017-04-12 17:50:00	21504	2017-04-06 20:55:00	226.605
2017-06-10 11:59:58	0.169299	2017-04-12 18:00:00	20864	2017-04-06 21:00:00	226.603
2017-06-10 12:59:58	0.203326	2017-04-12 18:10:00	19712	2017-04-06 21:05:00	226.606
2017-06-10 13:59:58	0.204904	2017-04-12 18:20:00	21504	2017-04-06 21:10:00	226.605
2017-06-10 14:59:58	0.173689	2017-04-12 18:30:00	19712	2017-04-06 21:15:00	226.605
2017-06-10 15:59:58	0.116159	2017-04-12 18:40:00	20352	2017-04-06 21:20:00	226.605
2017-06-10 16:59:58	0.044055	2017-04-12 18:50:00	19968	2017-04-06 21:25:00	226.605
2017-06-10 17:59:58	-0.028416	2017-04-12 19:00:00	21376	2017-04-06 21:30:00	226.602
2017-06-10 18:59:58	-0.087929	2017-04-12 19:10:00	20224	2017-04-06 21:35:00	226.603
2017-06-10 19:59:58	-0.125095	2017-04-12 19:20:00	21504	2017-04-06 21:40:00	226.606
2017-06-10 20:59:58	-0.136492	2017-04-12 19:30:00	22784	2017-04-06 21:45:00	226.604
2017-06-10 21:59:58	-0.125155	2017-04-12 19:40:00	20992	2017-04-06 21:50:00	226.605
2017-06-10 22:59:58	-0.099417	2017-04-12 19:50:00	21760	2017-04-06 21:55:00	226.604
2017-06-10 23:59:58	-0.070426	2017-04-12 20:00:00	21632	2017-04-06 22:00:00	226.606
2017-06-11 00:59:58	-0.048964	2017-04-12 20:10:00	22016	2017-04-06 22:05:00	226.605
2017-06-11 01:59:58	-0.042446	2017-04-12 20:20:00	21888	2017-04-06 22:10:00	226.603
2017-06-11 02:59:58	-0.052875	2017-04-12 20:30:00	22144	2017-04-06 22:15:00	226.606
2017-06-11 03:59:58	-0.076311	2017-04-12 20:40:00	21760	2017-04-06 22:20:00	226.604
2017-06-11 04:59:58	-0.103991	2017-04-12 20:50:00	22144	2017-04-06 22:25:00	226.605
2017-06-11 05:59:58	-0.124799	2017-04-12 21:00:00	21120	2017-04-06 22:30:00	226.604
2017-06-11 06:59:58	-0.12842	2017-04-12 21:10:00	21632	2017-04-06 22:35:00	226.606
2017-06-11 07:59:58	-0.108321	2017-04-12 21:20:00	22144	2017-04-06 22:40:00	226.603
2017-06-11 08:59:58	-0.063778	2017-04-12 21:30:00	22016	2017-04-06 22:45:00	226.605
2017-06-11 09:59:58	-0.000398	2017-04-12 21:40:00	21376	2017-04-06 22:50:00	226.606
2017-06-11 10:59:58	0.071	2017-04-12 21:50:00	22144	2017-04-06 22:55:00	226.607
2017-06-11 11:59:58	0.136837	2017-04-12 22:00:00	22528	2017-04-06 23:00:00	226.604
2017-06-11 12:59:58	0.183965	2017-04-12 22:10:00	21120	2017-04-06 23:05:00	226.606
2017-06-11 13:59:58	0.202765	2017-04-12 22:20:00	22144	2017-04-06 23:10:00	226.606
2017-06-11 14:59:58	0.189404	2017-04-12 22:30:00	22528	2017-04-06 23:15:00	226.606
2017-06-11 15:59:58	0.146712	2017-04-12 22:40:00	20992	2017-04-06 23:20:00	226.605
2017-06-11 16:59:58	0.083465	2017-04-12 22:50:00	22272	2017-04-06 23:25:00	226.606
2017-06-11 17:59:58	0.012282	2017-04-12 23:00:00	22528	2017-04-06 23:30:00	226.606
2017-06-11 18:59:58	-0.053354	2017-04-12 23:10:00	23040	2017-04-06 23:35:00	226.606
2017-06-11 19:59:58	-0.102205	2017-04-12 23:20:00	21632	2017-04-06 23:40:00	226.604
2017-06-11 20:59:58	-0.127772	2017-04-12 23:30:00	21632	2017-04-06 23:45:00	226.606
2017-06-11 21:59:58	-0.129554	2017-04-12 23:40:00	23680	2017-04-06 23:50:00	226.602
2017-06-11 22:59:58	-0.112792	2017-04-12 23:50:00	22144	2017-04-06 23:55:00	226.606
2017-06-11 23:59:58	-0.086757	2017-04-13	21632	2017-04-07	226.606
2017-06-12 00:59:58	-0.062053	2017-04-13 00:10:00	22528	2017-04-07 00:05:00	226.606
2017-06-12 01:59:58	-0.047637	2017-04-13 00:20:00	22656	2017-04-07 00:10:00	226.607
2017-06-12 02:59:58	-0.048346	2017-04-13 00:30:00	22912	2017-04-07 00:15:00	226.605
2017-06-12 03:59:58	-0.063585	2017-04-13 00:40:00	21248	2017-04-07 00:20:00	226.606
2017-06-12 04:59:58	-0.087529	2017-04-13 00:50:00	22784	2017-04-07 00:25:00	226.607
2017-06-12 05:59:58	-0.110782	2017-04-13 01:00:00	22016	2017-04-07 00:30:00	226.606
2017-06-12 06:59:58	-0.123043	2017-04-13 01:10:00	22016	2017-04-07 00:35:00	226.608
2017-06-12 07:59:58	-0.116061	2017-04-13 01:20:00	22272	2017-04-07 00:40:00	226.608
2017-06-12 08:59:58	-0.086079	2017-04-13 01:30:00	21888	2017-04-07 00:45:00	226.607
2017-06-12 09:59:58	-0.035125	2017-04-13 01:40:00	21120	2017-04-07 00:50:00	226.606
2017-06-12 10:59:58	0.029202	2017-04-13 01:50:00	20608	2017-04-07 00:55:00	226.606
2017-06-12 11:59:58	0.095382	2017-04-13 02:00:00	21120	2017-04-07 01:00:00	226.605
2017-06-12 12:59:58	0.150637	2017-04-13 02:10:00	21248	2017-04-07 01:05:00	226.607
2017-06-12 13:59:58	0.183928	2017-04-13 02:20:00	22272	2017-04-07 01:10:00	226.607
2017-06-12 14:59:58	0.188537	2017-04-13 02:30:00	21888	2017-04-07 01:15:00	226.607
2017-06-12 15:59:58	0.163608	2017-04-13 02:40:00	21376	2017-04-07 01:20:00	226.606
2017-06-12 16:59:58	0.114296	2017-04-13 02:50:00	20352	2017-04-07 01:25:00	226.607
2017-06-12 17:59:58	0.050507	2017-04-13 03:00:00	21376	2017-04-07 01:30:00	226.607
2017-06-12 18:59:58	-0.015455	2017-04-13 03:10:00	21120	2017-04-07 01:35:00	226.607
2017-06-12 19:59:58	-0.071724	2017-04-13 03:20:00	22272	2017-04-07 01:40:00	226.607
2017-06-12 20:59:58	-0.109542	2017-04-13 03:30:00	20608	2017-04-07 01:45:00	226.607
2017-06-12 21:59:58	-0.125089	2017-04-13 03:40:00	20736	2017-04-07 01:50:00	226.608
2017-06-12 22:59:58	-0.120065	2017-04-13 03:50:00	21888	2017-04-07 01:55:00	226.606
2017-06-12 23:59:58	-0.100885	2017-04-13 04:00:00	20224	2017-04-07 02:00:00	226.607
2017-06-13 00:59:58	-0.07672	2017-04-13 04:10:00	20224	2017-04-07 02:05:00	226.608
2017-06-13 01:59:58	-0.056877	2017-04-13 04:20:00	20224	2017-04-07 02:10:00	226.607
2017-06-13 02:59:58	-0.048231	2017-04-13 04:30:00	20736	2017-04-07 02:15:00	226.608
2017-06-13 03:59:58	-0.05335	2017-04-13 04:40:00	20224	2017-04-07 02:20:00	226.608
2017-06-13 04:59:58	-0.069842	2017-04-13 04:50:00	21248	2017-04-07 02:25:00	226.607
2017-06-13 05:59:58	-0.091068	2017-04-13 05:00:00	22784	2017-04-07 02:30:00	226.607
2017-06-13 06:59:58	-0.108046	2017-04-13 05:10:00	19840	2017-04-07 02:35:00	226.608
2017-06-13 07:59:58	-0.112024	2017-04-13 05:20:00	21120	2017-04-07 02:40:00	226.606
2017-06-13 08:59:58	-0.097019	2017-04-13 05:30:00	21760	2017-04-07 02:45:00	226.607
2017-06-13 09:59:58	-0.061657	2017-04-13 05:40:00	22272	2017-04-07 02:50:00	226.608
2017-06-13 10:59:58	-0.009814	2017-04-13 05:50:00	21504	2017-04-07 02:55:00	226.61
2017-06-13 11:59:58	0.050114	2017-04-13 06:00:00	21248	2017-04-07 03:00:00	226.609
2017-06-13 12:59:58	0.107092	2017-04-13 06:10:00	20992	2017-04-07 03:05:00	226.605
2017-06-13 13:59:58	0.150009	2017-04-13 06:20:00	22144	2017-04-07 03:10:00	226.608
2017-06-13 14:59:58	0.170277	2017-04-13 06:30:00	21248	2017-04-07 03:15:00	226.61
2017-06-13 15:59:58	0.163801	2017-04-13 06:40:00	22016	2017-04-07 03:20:00	226.608
2017-06-13 16:59:58	0.131894	2017-04-13 06:50:00	20992	2017-04-07 03:25:00	226.606
2017-06-13 17:59:58	0.080909	2017-04-13 07:00:00	21120	2017-04-07 03:30:00	226.608
2017-06-13 18:59:58	0.020727	2017-04-13 07:10:00	20608	2017-04-07 03:35:00	226.61
2017-06-13 19:59:58	-0.037528	2017-04-13 07:20:00	21504	2017-04-07 03:40:00	226.609
2017-06-13 20:59:58	-0.083992	2017-04-13 07:30:00	20480	2017-04-07 03:45:00	226.607
2017-06-13 21:59:58	-0.112186	2017-04-13 07:40:00	19840	2017-04-07 03:50:00	226.608
2017-06-13 22:59:58	-0.120273	2017-04-13 07:50:00	21248	2017-04-07 03:55:00	226.609
2017-06-13 23:59:58	-0.111163	2017-04-13 08:00:00	22272	2017-04-07 04:00:00	226.61
2017-06-14 00:59:58	-0.091454	2017-04-13 08:10:00	20736	2017-04-07 04:05:00	226.609
2017-06-14 01:59:58	-0.069496	2017-04-13 08:20:00	20736	2017-04-07 04:10:00	226.612
2017-06-14 02:59:58	-0.053071	2017-04-13 08:30:00	20992	2017-04-07 04:15:00	226.608
2017-06-14 03:59:58	-0.047286	2017-04-13 08:40:00	20352	2017-04-07 04:20:00	226.609
2017-06-14 04:59:58	-0.053237	2017-04-13 08:50:00	22528	2017-04-07 04:25:00	226.609
2017-06-14 05:59:58	-0.067783	2017-04-13 09:00:00	21376	2017-04-07 04:30:00	226.613
2017-06-14 06:59:58	-0.084493	2017-04-13 09:10:00	22656	2017-04-07 04:35:00	226.608
2017-06-14 07:59:58	-0.095508	2017-04-13 09:20:00	22016	2017-04-07 04:40:00	226.611
2017-06-14 08:59:58	-0.093815	2017-04-13 09:30:00	22016	2017-04-07 04:45:00	226.608
2017-06-14 09:59:58	-0.075309	2017-04-13 09:40:00	22912	2017-04-07 04:50:00	226.608
2017-06-14 10:59:58	-0.040107	2017-04-13 09:50:00	22144	2017-04-07 04:55:00	226.61
2017-06-14 11:59:58	0.007248	2017-04-13 10:00:00	20224	2017-04-07 05:00:00	226.609
2017-06-14 12:59:58	0.058719	2017-04-13 10:10:00	21248	2017-04-07 05:05:00	226.611
2017-06-14 13:59:58	0.104614	2017-04-13 10:20:00	21888	2017-04-07 05:10:00	226.611
2017-06-14 14:59:58	0.13583	2017-04-13 10:30:00	20864	2017-04-07 05:15:00	226.608
2017-06-14 15:59:58	0.14596	2017-04-13 10:40:00	22656	2017-04-07 05:20:00	226.612
2017-06-14 16:59:58	0.132753	2017-04-13 10:50:00	22400	2017-04-07 05:25:00	226.608
2017-06-14 17:59:58	0.098592	2017-04-13 11:00:00	20864	2017-04-07 05:30:00	226.609
2017-06-14 18:59:58	0.049917	2017-04-13 11:10:00	20992	2017-04-07 05:35:00	226.61
2017-06-14 19:59:58	-0.004256	2017-04-13 11:20:00	21888	2017-04-07 05:40:00	226.61
2017-06-14 20:59:58	-0.054345	2017-04-13 11:30:00	22912	2017-04-07 05:45:00	226.608
2017-06-14 21:59:58	-0.092285	2017-04-13 11:40:00	22400	2017-04-07 05:50:00	226.606
2017-06-14 22:59:58	-0.113193	2017-04-13 11:50:00	21888	2017-04-07 05:55:00	226.609
2017-06-14 23:59:58	-0.116255	2017-04-13 12:00:00	21120	2017-04-07 06:00:00	226.608
2017-06-15 00:59:58	-0.104634	2017-04-13 12:10:00	22400	2017-04-07 06:05:00	226.612
2017-06-15 01:59:58	-0.084435	2017-04-13 12:20:00	21632	2017-04-07 06:10:00	226.608
2017-06-15 02:59:58	-0.062994	2017-04-13 12:30:00	20480	2017-04-07 06:15:00	226.61
2017-06-15 03:59:58	-0.046906	2017-04-13 12:40:00	20608	2017-04-07 06:20:00	226.612
2017-06-15 04:59:58	-0.040318	2017-04-13 12:50:00	22016	2017-04-07 06:25:00	226.609
2017-06-15 05:59:58	-0.04389	2017-04-13 13:00:00	20352	2017-04-07 06:30:00	226.609
2017-06-15 06:59:58	-0.054737	2017-04-13 13:10:00	22400	2017-04-07 06:35:00	226.611
2017-06-15 07:59:58	-0.06732	2017-04-13 13:20:00	22400	2017-04-07 06:40:00	226.609
2017-06-15 08:59:58	-0.075077	2017-04-13 13:30:00	20864	2017-04-07 06:45:00	226.61
2017-06-15 09:59:58	-0.072325	2017-04-13 13:40:00	21504	2017-04-07 06:50:00	226.608
2017-06-15 10:59:58	-0.055943	2017-04-13 13:50:00	20608	2017-04-07 06:55:00	226.611
2017-06-15 11:59:58	-0.026368	2017-04-13 14:00:00	22272	2017-04-07 07:00:00	226.611
2017-06-15 12:59:58	0.012336	2017-04-13 14:10:00	21760	2017-04-07 07:05:00	226.61
2017-06-15 13:59:58	0.053343	2017-04-13 14:20:00	22016	2017-04-07 07:10:00	226.611
2017-06-15 14:59:58	0.088632	2017-04-13 14:30:00	20864	2017-04-07 07:15:00	226.612
2017-06-15 15:59:58	0.110848	2017-04-13 14:40:00	22784	2017-04-07 07:20:00	226.612
2017-06-15 16:59:58	0.114999	2017-04-13 14:50:00	22272	2017-04-07 07:25:00	226.613
2017-06-15 17:59:58	0.099602	2017-04-13 15:00:00	21120	2017-04-07 07:30:00	226.613
2017-06-15 18:59:58	0.067026	2017-04-13 15:10:00	22272	2017-04-07 07:35:00	226.612
2017-06-15 19:59:58	0.022978	2017-04-13 15:20:00	21760	2017-04-07 07:40:00	226.608
2017-06-15 20:59:58	-0.024731	2017-04-13 15:30:00	20864	2017-04-07 07:45:00	226.607
2017-06-15 21:59:58	-0.067853	2017-04-13 15:40:00	21248	2017-04-07 07:50:00	226.607
2017-06-15 22:59:58	-0.09944	2017-04-13 15:50:00	22144	2017-04-07 07:55:00	226.611
2017-06-15 23:59:58	-0.115261	2017-04-13 16:00:00	21632	2017-04-07 08:00:00	226.608
2017-06-16 00:59:58	-0.114596	2017-04-13 16:10:00	20352	2017-04-07 08:05:00	226.61
2017-06-16 01:59:58	-0.100218	2017-04-13 16:20:00	20736	2017-04-07 08:10:00	226.61
2017-06-16 02:59:58	-0.077575	2017-04-13 16:30:00	20736	2017-04-07 08:15:00	226.609
2017-06-16 03:59:58	-0.053356	2017-04-13 16:40:00	22528	2017-04-07 08:20:00	226.611
2017-06-16 04:59:58	-0.033792	2017-04-13 16:50:00	22016	2017-04-07 08:25:00	226.612
2017-06-16 05:59:58	-0.023107	2017-04-13 17:00:00	20480	2017-04-07 08:30:00	226.61
2017-06-16 06:59:58	-0.02253	2017-04-13 17:10:00	22400	2017-04-07 08:35:00	226.612
2017-06-16 07:59:58	-0.0301	2017-04-13 17:20:00	20480	2017-04-07 08:40:00	226.611
2017-06-16 08:59:58	-0.041328	2017-04-13 17:30:00	20608	2017-04-07 08:45:00	226.613
2017-06-16 09:59:58	-0.050528	2017-04-13 17:40:00	21248	2017-04-07 08:50:00	226.609
2017-06-16 10:59:58	-0.05245	2017-04-13 17:50:00	21760	2017-04-07 08:55:00	226.611
2017-06-16 11:59:58	-0.043785	2017-04-13 18:00:00	21248	2017-04-07 09:00:00	226.614
2017-06-16 12:59:58	-0.024142	2017-04-13 18:10:00	21120	2017-04-07 09:05:00	226.609
2017-06-16 13:59:58	0.00374	2017-04-13 18:20:00	21504	2017-04-07 09:10:00	226.612
2017-06-16 14:59:58	0.03458	2017-04-13 18:30:00	20736	2017-04-07 09:15:00	226.613
2017-06-16 15:59:58	0.061781	2017-04-13 18:40:00	21248	2017-04-07 09:20:00	226.611
2017-06-16 16:59:58	0.078978	2017-04-13 18:50:00	22144	2017-04-07 09:25:00	226.61
2017-06-16 17:59:58	0.081539	2017-04-13 19:00:00	21888	2017-04-07 09:30:00	226.614
2017-06-16 18:59:58	0.067679	2017-04-13 19:10:00	20352	2017-04-07 09:35:00	226.611
2017-06-16 19:59:58	0.038947	2017-04-13 19:20:00	20992	2017-04-07 09:40:00	226.613
2017-06-16 20:59:58	-1.6e-05	2017-04-13 19:30:00	21248	2017-04-07 09:45:00	226.61
2017-06-16 21:59:58	-0.042396	2017-04-13 19:40:00	20992	2017-04-07 09:50:00	226.611
2017-06-16 22:59:58	-0.080607	2017-04-13 19:50:00	20480	2017-04-07 09:55:00	226.61
2017-06-16 23:59:58	-0.107888	2017-04-13 20:00:00	22784	2017-04-07 10:00:00	226.611
2017-06-17 00:59:58	-0.119745	2017-04-13 20:10:00	20608	2017-04-07 10:05:00	226.612
2017-06-17 01:59:58	-0.114924	2017-04-13 20:20:00	21632	2017-04-07 10:10:00	226.612
2017-06-17 02:59:58	-0.095657	2017-04-13 20:30:00	21504	2017-04-07 10:15:00	226.61
2017-06-17 03:59:58	-0.067114	2017-04-13 20:40:00	21248	2017-04-07 10:20:00	226.609
2017-06-17 04:59:58	-0.036159	2017-04-13 20:50:00	22016	2017-04-07 10:25:00	226.612
2017-06-17 05:59:58	-0.009703	2017-04-13 21:00:00	19968	2017-04-07 10:30:00	226.611
2017-06-17 06:59:58	0.00695	2017-04-13 21:10:00	21120	2017-04-07 10:35:00	226.608
2017-06-17 07:59:58	0.011337	2017-04-13 21:20:00	23040	2017-04-07 10:40:00	226.61
2017-06-17 08:59:58	0.004331	2017-04-13 21:30:00	22528	2017-04-07 10:45:00	226.61
2017-06-17 09:59:58	-0.010217	2017-04-13 21:40:00	21504	2017-04-07 10:50:00	226.612
2017-06-17 10:59:58	-0.026607	2017-04-13 21:50:00	21376	2017-04-07 10:55:00	226.612
2017-06-17 11:59:58	-0.03886	2017-04-13 22:00:00	21760	2017-04-07 11:00:00	226.612
2017-06-17 12:59:58	-0.042335	2017-04-13 22:10:00	21888	2017-04-07 11:05:00	226.611
2017-06-17 13:59:58	-0.034963	2017-04-13 22:20:00	22912	2017-04-07 11:10:00	226.611
2017-06-17 14:59:58	-0.017809	2017-04-13 22:30:00	22144	2017-04-07 11:15:00	226.609
2017-06-17 15:59:58	0.005163	2017-04-13 22:40:00	21888	2017-04-07 11:20:00	226.609
2017-06-17 16:59:57	0.028052	2017-04-13 22:50:00	21760	2017-04-07 11:25:00	226.612
2017-06-17 17:59:57	0.044456	2017-04-13 23:00:00	21760	2017-04-07 11:30:00	226.61
2017-06-17 18:59:57	0.04905	2017-04-13 23:10:00	22016	2017-04-07 11:35:00	226.608
2017-06-17 19:59:57	0.03895	2017-04-13 23:20:00	22784	2017-04-07 11:40:00	226.613
2017-06-17 20:59:57	0.014543	2017-04-13 23:30:00	22784	2017-04-07 11:45:00	226.612
2017-06-17 21:59:57	-0.020408	2017-04-13 23:40:00	21120	2017-04-07 11:50:00	226.611
2017-06-17 22:59:57	-0.05944	2017-04-13 23:50:00	21504	2017-04-07 11:55:00	226.609
2017-06-17 23:59:57	-0.09472	2017-04-14	22656	2017-04-07 12:00:00	226.612
2017-06-18 00:59:57	-0.118776	2017-04-14 00:10:00	22656	2017-04-07 12:05:00	226.612
2017-06-18 01:59:57	-0.126232	2017-04-14 00:20:00	20992	2017-04-07 12:10:00	226.613
2017-06-18 02:59:57	-0.115138	2017-04-14 00:30:00	22144	2017-04-07 12:15:00	226.612
2017-06-18 03:59:57	-0.087544	2017-04-14 00:40:00	20352	2017-04-07 12:20:00	226.612
2017-06-18 04:59:57	-0.049138	2017-04-14 00:50:00	21760	2017-04-07 12:25:00	226.613
2017-06-18 05:59:57	-0.007982	2017-04-14 01:00:00	21888	2017-04-07 12:30:00	226.613
2017-06-18 06:59:57	0.027352	2017-04-14 01:10:00	22144	2017-04-07 12:35:00	226.616
2017-06-18 07:59:57	0.049812	2017-04-14 01:20:00	21504	2017-04-07 12:40:00	226.609
2017-06-18 08:59:57	0.055524	2017-04-14 01:30:00	20864	2017-04-07 12:45:00	226.614
2017-06-18 09:59:57	0.044655	2017-04-14 01:40:00	22016	2017-04-07 12:50:00	226.615
2017-06-18 10:59:57	0.021265	2017-04-14 01:50:00	20224	2017-04-07 12:55:00	226.612
2017-06-18 11:59:57	-0.007809	2017-04-14 02:00:00	21120	2017-04-07 13:00:00	226.613
2017-06-18 12:59:57	-0.034749	2017-04-14 02:10:00	21120	2017-04-07 13:05:00	226.613
2017-06-18 13:59:57	-0.052745	2017-04-14 02:20:00	19072	2017-04-07 13:10:00	226.614
2017-06-18 14:59:57	-0.057692	2017-04-14 02:30:00	21760	2017-04-07 13:15:00	226.614
2017-06-18 15:59:57	-0.049179	2017-04-14 02:40:00	21888	2017-04-07 13:20:00	226.615
2017-06-18 16:59:57	-0.030532	2017-04-14 02:50:00	21248	2017-04-07 13:25:00	226.615
2017-06-18 17:59:57	-0.007938	2017-04-14 03:00:00	20992	2017-04-07 13:30:00	226.612
2017-06-18 18:59:57	0.011147	2017-04-14 03:10:00	21376	2017-04-07 13:35:00	226.614
2017-06-18 19:59:57	0.019929	2017-04-14 03:20:00	20736	2017-04-07 13:40:00	226.616
2017-06-18 20:59:57	0.014073	2017-04-14 03:30:00	20992	2017-04-07 13:45:00	226.615
2017-06-18 21:59:57	-0.007035	2017-04-14 03:40:00	20736	2017-04-07 13:50:00	226.616
2017-06-18 22:59:57	-0.039908	2017-04-14 03:50:00	22144	2017-04-07 13:55:00	226.612
2017-06-18 23:59:57	-0.077571	2017-04-14 04:00:00	21376	2017-04-07 14:00:00	226.613
2017-06-19 00:59:57	-0.111085	2017-04-14 04:10:00	21504	2017-04-07 14:05:00	226.615
2017-06-19 01:59:57	-0.131659	2017-04-14 04:20:00	21888	2017-04-07 14:10:00	226.613
2017-06-19 02:59:57	-0.132859	2017-04-14 04:30:00	20736	2017-04-07 14:15:00	226.614
2017-06-19 03:59:57	-0.112358	2017-04-14 04:40:00	20992	2017-04-07 14:20:00	226.614
2017-06-19 04:59:57	-0.07276	2017-04-14 04:50:00	19968	2017-04-07 14:25:00	226.616
2017-06-19 05:59:57	-0.021226	2017-04-14 05:00:00	22016	2017-04-07 14:30:00	226.616
2017-06-19 06:59:57	0.032062	2017-04-14 05:10:00	21376	2017-04-07 14:35:00	226.617
2017-06-19 07:59:57	0.076238	2017-04-14 05:20:00	21120	2017-04-07 14:40:00	226.613
2017-06-19 08:59:57	0.102327	2017-04-14 05:30:00	21248	2017-04-07 14:45:00	226.615
2017-06-19 09:59:57	0.105386	2017-04-14 05:40:00	20864	2017-04-07 14:50:00	226.615
2017-06-19 10:59:57	0.085662	2017-04-14 05:50:00	20736	2017-04-07 14:55:00	226.617
2017-06-19 11:59:57	0.048464	2017-04-14 06:00:00	20736	2017-04-07 15:00:00	226.615
2017-06-19 12:59:57	0.002794	2017-04-14 06:10:00	21632	2017-04-07 15:05:00	226.615
2017-06-19 13:59:57	-0.040913	2017-04-14 06:20:00	20992	2017-04-07 15:10:00	226.618
2017-06-19 14:59:57	-0.073349	2017-04-14 06:30:00	21376	2017-04-07 15:15:00	226.615
2017-06-19 15:59:57	-0.088559	2017-04-14 06:40:00	21632	2017-04-07 15:20:00	226.617
2017-06-19 16:59:57	-0.085296	2017-04-14 06:50:00	21248	2017-04-07 15:25:00	226.616
2017-06-19 17:59:57	-0.067169	2017-04-14 07:00:00	22144	2017-04-07 15:30:00	226.616
2017-06-19 18:59:57	-0.041603	2017-04-14 07:10:00	21760	2017-04-07 15:35:00	226.617
2017-06-19 19:59:57	-0.017837	2017-04-14 07:20:00	21504	2017-04-07 15:40:00	226.616
2017-06-19 20:59:57	-0.004468	2017-04-14 07:30:00	20608	2017-04-07 15:45:00	226.618
2017-06-19 21:59:57	-0.007134	2017-04-14 07:40:00	20864	2017-04-07 15:50:00	226.616
2017-06-19 22:59:57	-0.026892	2017-04-14 07:50:00	21760	2017-04-07 15:55:00	226.617
2017-06-19 23:59:57	-0.059727	2017-04-14 08:00:00	21120	2017-04-07 16:00:00	226.618
2017-06-20 00:59:57	-0.097353	2017-04-14 08:10:00	20608	2017-04-07 16:05:00	226.615
2017-06-20 01:59:57	-0.129154	2017-04-14 08:20:00	22144	2017-04-07 16:10:00	226.617
2017-06-20 02:59:57	-0.144854	2017-04-14 08:30:00	21248	2017-04-07 16:15:00	226.614
2017-06-20 03:59:57	-0.137245	2017-04-14 08:40:00	19968	2017-04-07 16:20:00	226.615
2017-06-20 04:59:57	-0.104289	2017-04-14 08:50:00	22400	2017-04-07 16:25:00	226.616
2017-06-20 05:59:57	-0.050002	2017-04-14 09:00:00	22016	2017-04-07 16:30:00	226.619
2017-06-20 06:59:57	0.016167	2017-04-14 09:10:00	21632	2017-04-07 16:35:00	226.615
2017-06-20 07:59:57	0.08137	2017-04-14 09:20:00	21632	2017-04-07 16:40:00	226.616
2017-06-20 08:59:57	0.132324	2017-04-14 09:30:00	20352	2017-04-07 16:45:00	226.616
2017-06-20 09:59:57	0.158481	2017-04-14 09:40:00	20992	2017-04-07 16:50:00	226.617
2017-06-20 10:59:57	0.154566	2017-04-14 09:50:00	21248	2017-04-07 16:55:00	226.617
2017-06-20 11:59:57	0.121849	2017-04-14 10:00:00	21760	2017-04-07 17:00:00	226.617
2017-06-20 12:59:57	0.067805	2017-04-14 10:10:00	22400	2017-04-07 17:05:00	226.617
2017-06-20 13:59:57	0.004259	2017-04-14 10:20:00	21120	2017-04-07 17:10:00	226.615
2017-06-20 14:59:57	-0.055501	2017-04-14 10:30:00	22784	2017-04-07 17:15:00	226.614
2017-06-20 15:59:57	-0.099908	2017-04-14 10:40:00	22144	2017-04-07 17:20:00	226.619
2017-06-20 16:59:57	-0.121808	2017-04-14 10:50:00	22272	2017-04-07 17:25:00	226.615
2017-06-20 17:59:57	-0.119997	2017-04-14 11:00:00	21120	2017-04-07 17:30:00	226.617
2017-06-20 18:59:57	-0.09926	2017-04-14 11:10:00	21120	2017-04-07 17:35:00	226.616
2017-06-20 19:59:57	-0.068921	2017-04-14 11:20:00	22656	2017-04-07 17:40:00	226.615
2017-06-20 20:59:57	-0.040273	2017-04-14 11:30:00	23168	2017-04-07 17:45:00	226.615
2017-06-20 21:59:57	-0.023542	2017-04-14 11:40:00	22144	2017-04-07 17:50:00	226.618
2017-06-20 22:59:57	-0.025111	2017-04-14 11:50:00	22144	2017-04-07 17:55:00	226.616
2017-06-20 23:59:57	-0.045715	2017-04-14 12:00:00	21376	2017-04-07 18:00:00	226.618
2017-06-21 00:59:57	-0.080064	2017-04-14 12:10:00	21248	2017-04-07 18:05:00	226.617
2017-06-21 01:59:57	-0.118047	2017-04-14 12:20:00	20480	2017-04-07 18:10:00	226.616
2017-06-21 02:59:57	-0.147247	2017-04-14 12:30:00	21888	2017-04-07 18:15:00	226.619
2017-06-21 03:59:57	-0.156195	2017-04-14 12:40:00	20352	2017-04-07 18:20:00	226.619
2017-06-21 04:59:57	-0.137543	2017-04-14 12:50:00	21888	2017-04-07 18:25:00	226.617
2017-06-21 05:59:57	-0.090321	2017-04-14 13:00:00	21504	2017-04-07 18:30:00	226.618
2017-06-21 06:59:57	-0.020664	2017-04-14 13:10:00	22656	2017-04-07 18:35:00	226.615
2017-06-21 07:59:57	0.059266	2017-04-14 13:20:00	21248	2017-04-07 18:40:00	226.618
2017-06-21 08:59:57	0.133944	2017-04-14 13:30:00	22016	2017-04-07 18:45:00	226.614
2017-06-21 09:59:57	0.188101	2017-04-14 13:40:00	20992	2017-04-07 18:50:00	226.618
2017-06-21 10:59:57	0.210376	2017-04-14 13:50:00	22016	2017-04-07 18:55:00	226.614
2017-06-21 11:59:57	0.196075	2017-04-14 14:00:00	22144	2017-04-07 19:00:00	226.617
2017-06-21 12:59:57	0.14832	2017-04-14 14:10:00	20864	2017-04-07 19:05:00	226.614
2017-06-21 13:59:57	0.077279	2017-04-14 14:20:00	21376	2017-04-07 19:10:00	226.614
2017-06-21 14:59:57	-0.002302	2017-04-14 14:30:00	21632	2017-04-07 19:15:00	226.617
2017-06-21 15:59:57	-0.074652	2017-04-14 14:40:00	22144	2017-04-07 19:20:00	226.616
2017-06-21 16:59:57	-0.12669	2017-04-14 14:50:00	20352	2017-04-07 19:25:00	226.615
2017-06-21 17:59:57	-0.150989	2017-04-14 15:00:00	19328	2017-04-07 19:30:00	226.616
2017-06-21 18:59:57	-0.147279	2017-04-14 15:10:00	20736	2017-04-07 19:35:00	226.613
2017-06-21 19:59:57	-0.122139	2017-04-14 15:20:00	23296	2017-04-07 19:40:00	226.613
2017-06-21 20:59:57	-0.086994	2017-04-14 15:30:00	21376	2017-04-07 19:45:00	226.613
2017-06-21 21:59:57	-0.054948	2017-04-14 15:40:00	20736	2017-04-07 19:50:00	226.615
2017-06-21 22:59:57	-0.037236	2017-04-14 15:50:00	20608	2017-04-07 19:55:00	226.613
2017-06-21 23:59:57	-0.04019	2017-04-14 16:00:00	19200	2017-04-07 20:00:00	226.613
2017-06-22 00:59:57	-0.063467	2017-04-14 16:10:00	20480	2017-04-07 20:05:00	226.615
2017-06-22 01:59:57	-0.100023	2017-04-14 16:20:00	21760	2017-04-07 20:10:00	226.614
2017-06-22 02:59:57	-0.137839	2017-04-14 16:30:00	22656	2017-04-07 20:15:00	226.613
2017-06-22 03:59:57	-0.163042	2017-04-14 16:40:00	20352	2017-04-07 20:20:00	226.615
2017-06-22 04:59:57	-0.16364	2017-04-14 16:50:00	20352	2017-04-07 20:25:00	226.613
2017-06-22 05:59:57	-0.132926	2017-04-14 17:00:00	20224	2017-04-07 20:30:00	226.612
2017-06-22 06:59:57	-0.071674	2017-04-14 17:10:00	21760	2017-04-07 20:35:00	226.613
2017-06-22 07:59:57	0.011518	2017-04-14 17:20:00	20864	2017-04-07 20:40:00	226.611
2017-06-22 08:59:57	0.101881	2017-04-14 17:30:00	20608	2017-04-07 20:45:00	226.614
2017-06-22 09:59:57	0.18177	2017-04-14 17:40:00	21376	2017-04-07 20:50:00	226.615
2017-06-22 10:59:57	0.234807	2017-04-14 17:50:00	20096	2017-04-07 20:55:00	226.614
2017-06-22 11:59:57	0.249813	2017-04-14 18:00:00	21760	2017-04-07 21:00:00	226.616
2017-06-22 12:59:57	0.223529	2017-04-14 18:10:00	20608	2017-04-07 21:05:00	226.614
2017-06-22 13:59:57	0.161417	2017-04-14 18:20:00	21376	2017-04-07 21:10:00	226.611
2017-06-22 14:59:57	0.076337	2017-04-14 18:30:00	22272	2017-04-07 21:15:00	226.613
2017-06-22 15:59:57	-0.01456	2017-04-14 18:40:00	20480	2017-04-07 21:20:00	226.614
2017-06-22 16:59:57	-0.093916	2017-04-14 18:50:00	21248	2017-04-07 21:25:00	226.613
2017-06-22 17:59:57	-0.14821	2017-04-14 19:00:00	22016	2017-04-07 21:30:00	226.614
2017-06-22 18:59:57	-0.17074	2017-04-14 19:10:00	21248	2017-04-07 21:35:00	226.615
2017-06-22 19:59:57	-0.162841	2017-04-14 19:20:00	20992	2017-04-07 21:40:00	226.615
2017-06-22 20:59:57	-0.133084	2017-04-14 19:30:00	21888	2017-04-07 21:45:00	226.612
2017-06-22 21:59:57	-0.094698	2017-04-14 19:40:00	21888	2017-04-07 21:50:00	226.613
2017-06-22 22:59:57	-0.061888	2017-04-14 19:50:00	21376	2017-04-07 21:55:00	226.615
2017-06-22 23:59:57	-0.046001	2017-04-14 20:00:00	20736	2017-04-07 22:00:00	226.615
2017-06-23 00:59:57	-0.052474	2017-04-14 20:10:00	22784	2017-04-07 22:05:00	226.615
2017-06-23 01:59:57	-0.079355	2017-04-14 20:20:00	22784	2017-04-07 22:10:00	226.615
2017-06-23 02:59:57	-0.117747	2017-04-14 20:30:00	21504	2017-04-07 22:15:00	226.615
2017-06-23 03:59:57	-0.154111	2017-04-14 20:40:00	21120	2017-04-07 22:20:00	226.616
2017-06-23 04:59:57	-0.173858	2017-04-14 20:50:00	21376	2017-04-07 22:25:00	226.616
2017-06-23 05:59:57	-0.165347	2017-04-14 21:00:00	22272	2017-04-07 22:30:00	226.614
[truncated: 55,025 more rows]

## Sheet: Foglio2
2017-06-01	0	226.867	226.87	-0.003	0.175399			2017-08-10 09:59:59	0	226.689	226.68	0.009	0.854647	0.01341		2017-08-10 10:00:00	0	21504	21649	-145	0.479613		-3214.7
2017-06-01 00:05:00	5	226.864	226.87	-0.00599	0.0780996			2017-08-10 10:04:59	5	226.688	226.68	0.00803	0.822676	-0.01693		2017-08-10 10:10:00	10	20992	21649	-656.993	0.399619		3185.67
2017-06-01 00:10:00	10	226.866	226.87	-0.00398	0.143508			2017-08-10 10:09:59	10	226.691	226.68	0.01106	0.922544			2017-08-10 10:20:00	20	23168	21649	1519.01	0.7396
2017-06-01 00:15:00	15	226.867	226.87	-0.00297	0.176375			2017-08-10 10:14:59	15	226.689	226.68	0.00909	0.857614			2017-08-10 10:30:00	30	22272	21649	623.021	0.599609
2017-06-01 00:20:00	20	226.865	226.87	-0.00496	0.111617			2017-08-10 10:19:59	20	226.69	226.68	0.01012	0.891562			2017-08-10 10:40:00	40	19968	21649	-1680.97	0.239631
2017-06-01 00:25:00	25	226.865	226.87	-0.00495	0.111943			2017-08-10 10:24:59	25	226.689	226.68	0.00915	0.859591			2017-08-10 10:50:00	50	21120	21649	-528.965	0.419622
2017-06-01 00:30:00	30	226.864	226.87	-0.00594	0.0797267			2017-08-10 10:29:59	30	226.69	226.68	0.01018	0.89354			2017-08-10 11:00:00	60	22144	21649	495.042	0.579614
2017-06-01 00:35:00	35	226.865	226.87	-0.00493	0.112594			2017-08-10 10:34:59	35	226.691	226.68	0.01121	0.927488			2017-08-10 11:10:00	70	21632	21649	-16.951	0.499619
2017-06-01 00:40:00	40	226.865	226.87	-0.00492	0.112919			2017-08-10 10:39:59	40	226.691	226.68	0.01124	0.928477			2017-08-10 11:20:00	80	21248	21648.9	-400.944	0.439624
2017-06-01 00:45:00	45	226.865	226.87	-0.00491	0.113244			2017-08-10 10:44:59	45	226.688	226.68	0.00827	0.830587			2017-08-10 11:30:00	90	20480	21648.9	-1168.94	0.319632
2017-06-01 00:50:00	50	226.867	226.87	-0.0029	0.178653			2017-08-10 10:49:59	50	226.691	226.68	0.0113	0.930455			2017-08-10 11:40:00	100	22656	21648.9	1007.07	0.659613
2017-06-01 00:55:00	55	226.867	226.87	-0.00289	0.178978			2017-08-10 10:54:59	55	226.691	226.68	0.01133	0.931444			2017-08-10 11:50:00	110	20992	21648.9	-656.923	0.39963
2017-06-01 01:00:00	60	226.868	226.87	-0.00188	0.211845			2017-08-10 10:59:59	60	226.691	226.68	0.01136	0.932432			2017-08-10 12:00:00	120	22272	21648.9	623.084	0.599619
2017-06-01 01:05:00	65	226.866	226.87	-0.00387	0.147088			2017-08-10 11:04:59	65	226.691	226.68	0.01139	0.933421			2017-08-10 12:10:00	130	20480	21648.9	-1168.91	0.319636
2017-06-01 01:10:00	70	226.867	226.87	-0.00286	0.179954			2017-08-10 11:09:59	70	226.691	226.68	0.01142	0.93441			2017-08-10 12:20:00	140	21632	21648.9	-16.902	0.499627
2017-06-01 01:15:00	75	226.866	226.87	-0.00385	0.147738			2017-08-10 11:14:59	75	226.69	226.68	0.01045	0.902439			2017-08-10 12:30:00	150	20864	21648.9	-784.895	0.379635
2017-06-01 01:20:00	80	226.867	226.87	-0.00284	0.180605			2017-08-10 11:19:59	80	226.691	226.68	0.01148	0.936388			2017-08-10 12:40:00	160	20224	21648.9	-1424.89	0.279642
2017-06-01 01:25:00	85	226.866	226.87	-0.00383	0.148389			2017-08-10 11:24:59	85	226.689	226.679	0.00951	0.871457			2017-08-10 12:50:00	170	20992	21648.9	-656.881	0.399636
2017-06-01 01:30:00	90	226.866	226.87	-0.00382	0.148715			2017-08-10 11:29:59	90	226.689	226.679	0.00954	0.872446			2017-08-10 13:00:00	180	21760	21648.9	111.126	0.51963
2017-06-01 01:35:00	95	226.865	226.87	-0.00481	0.116499			2017-08-10 11:34:59	95	226.691	226.679	0.01157	0.939354			2017-08-10 13:10:00	190	20864	21648.9	-784.867	0.379639
2017-06-01 01:40:00	100	226.865	226.87	-0.0048	0.116824			2017-08-10 11:39:59	100	226.69	226.679	0.0106	0.907383			2017-08-10 13:20:00	200	21632	21648.9	-16.86	0.499634
2017-06-01 01:45:00	105	226.867	226.87	-0.00279	0.182232			2017-08-10 11:44:59	105	226.689	226.679	0.00963	0.875412			2017-08-10 13:30:00	210	20992	21648.9	-656.853	0.39964
2017-06-01 01:50:00	110	226.867	226.87	-0.00278	0.182558			2017-08-10 11:49:59	110	226.691	226.679	0.01166	0.94232			2017-08-10 13:40:00	220	22016	21648.8	367.154	0.559632
2017-06-01 01:55:00	115	226.864	226.87	-0.00577	0.0852587			2017-08-10 11:54:59	115	226.69	226.679	0.01069	0.910349			2017-08-10 13:50:00	230	20096	21648.8	-1552.84	0.259651
2017-06-01 02:00:00	120	226.868	226.87	-0.00176	0.21575			2017-08-10 11:59:59	120	226.692	226.679	0.01272	0.977258			2017-08-10 14:00:00	240	21376	21648.8	-272.832	0.45964
2017-06-01 02:05:00	125	226.867	226.87	-0.00275	0.183534			2017-08-10 12:04:59	125	226.689	226.679	0.00975	0.879367			2017-08-10 14:10:00	250	20608	21648.8	-1040.83	0.339648
2017-06-01 02:10:00	130	226.864	226.87	-0.00574	0.0862349			2017-08-10 12:09:59	130	226.689	226.679	0.00978	0.880356			2017-08-10 14:20:00	260	21632	21648.8	-16.818	0.49964
2017-06-01 02:15:00	135	226.863	226.87	-0.00673	0.0540189			2017-08-10 12:14:59	135	226.692	226.679	0.01281	0.980224			2017-08-10 14:30:00	270	20480	21648.8	-1168.81	0.319652
2017-06-01 02:20:00	140	226.867	226.87	-0.00272	0.18451			2017-08-10 12:19:59	140	226.691	226.679	0.01184	0.948253			2017-08-10 14:40:00	280	22016	21648.8	367.196	0.559639
2017-06-01 02:25:00	145	226.867	226.87	-0.00271	0.184836			2017-08-10 12:24:59	145	226.691	226.679	0.01187	0.949242			2017-08-10 14:50:00	290	21120	21648.8	-528.797	0.419648
2017-06-01 02:30:00	150	226.867	226.87	-0.0027	0.185161			2017-08-10 12:29:59	150	226.691	226.679	0.0119	0.950231			2017-08-10 15:00:00	300	21120	21648.8	-528.79	0.419649
2017-06-01 02:35:00	155	226.865	226.87	-0.00469	0.120404			2017-08-10 12:34:59	155	226.691	226.679	0.01193	0.95122			2017-08-10 15:10:00	310	20480	21648.8	-1168.78	0.319656
2017-06-01 02:40:00	160	226.866	226.87	-0.00368	0.15327			2017-08-10 12:39:59	160	226.69	226.679	0.01096	0.919249			2017-08-10 15:20:00	320	20608	21648.8	-1040.78	0.339656
2017-06-01 02:45:00	165	226.867	226.87	-0.00267	0.186137			2017-08-10 12:44:59	165	226.691	226.679	0.01199	0.953197			2017-08-10 15:30:00	330	20096	21648.8	-1552.77	0.259662
2017-06-01 02:50:00	170	226.864	226.87	-0.00566	0.0888383			2017-08-10 12:49:59	170	226.692	226.679	0.01302	0.987146			2017-08-10 15:40:00	340	20480	21648.8	-1168.76	0.319659
2017-06-01 02:55:00	175	226.868	226.87	-0.00165	0.21933			2017-08-10 12:54:59	175	226.69	226.679	0.01105	0.922215			2017-08-10 15:50:00	350	21376	21648.8	-272.755	0.459652
2017-06-01 03:00:00	180	226.868	226.87	-0.00164	0.219655			2017-08-10 12:59:59	180	226.688	226.679	0.00908	0.857284			2017-08-10 16:00:00	360	21760	21648.7	111.252	0.51965
2017-06-01 03:05:00	185	226.864	226.87	-0.00563	0.0898145			2017-08-10 13:04:59	185	226.691	226.679	0.01211	0.957152			2017-08-10 16:10:00	370	21632	21648.7	-16.741	0.499652
2017-06-01 03:10:00	190	226.867	226.87	-0.00262	0.187764			2017-08-10 13:09:59	190	226.692	226.679	0.01314	0.991101			2017-08-10 16:20:00	380	20480	21648.7	-1168.73	0.319664
2017-06-01 03:15:00	195	226.865	226.87	-0.00461	0.123007			2017-08-10 13:14:59	195	226.689	226.679	0.01017	0.89321			2017-08-10 16:30:00	390	21760	21648.7	111.273	0.519653
2017-06-01 03:20:00	200	226.867	226.87	-0.0026	0.188415			2017-08-10 13:19:59	200	226.688	226.679	0.0092	0.861239			2017-08-10 16:40:00	400	20736	21648.7	-912.72	0.359664
2017-06-01 03:25:00	205	226.865	226.87	-0.00459	0.123658			2017-08-10 13:24:59	205	226.691	226.679	0.01223	0.961107			2017-08-10 16:50:00	410	19968	21648.7	-1680.71	0.239672
2017-06-01 03:30:00	210	226.867	226.87	-0.00258	0.189066			2017-08-10 13:29:59	210	226.69	226.679	0.01126	0.929136			2017-08-10 17:00:00	420	21120	21648.7	-528.706	0.419662
2017-06-01 03:35:00	215	226.864	226.87	-0.00557	0.091767			2017-08-10 13:34:59	215	226.69	226.679	0.01129	0.930125			2017-08-10 17:10:00	430	20864	21648.7	-784.699	0.379666
2017-06-01 03:40:00	220	226.868	226.87	-0.00156	0.222258			2017-08-10 13:39:59	220	226.691	226.679	0.01232	0.964074			2017-08-10 17:20:00	440	20480	21648.7	-1168.69	0.31967
2017-06-01 03:45:00	225	226.866	226.87	-0.00355	0.157501			2017-08-10 13:44:59	225	226.69	226.679	0.01135	0.932103			2017-08-10 17:30:00	450	23168	21648.7	1519.31	0.739647
2017-06-01 03:50:00	230	226.867	226.87	-0.00254	0.190368			2017-08-10 13:49:59	230	226.689	226.679	0.01038	0.900132			2017-08-10 17:40:00	460	21632	21648.7	-16.678	0.499662
2017-06-01 03:55:00	235	226.865	226.87	-0.00453	0.12561			2017-08-10 13:54:59	235	226.692	226.679	0.01341	1			2017-08-10 17:50:00	470	23040	21648.7	1391.33	0.71965
2017-06-01 04:00:00	240	226.866	226.87	-0.00352	0.158477			2017-08-10 13:59:59	240	226.689	226.679	0.01044	0.902109			2017-08-10 18:00:00	480	20352	21648.7	-1296.66	0.299676
2017-06-01 04:05:00	245	226.864	226.87	-0.00551	0.0937195			2017-08-10 14:04:59	245	226.687	226.679	0.00847	0.837179			2017-08-10 18:10:00	490	21760	21648.7	111.343	0.519664
2017-06-01 04:10:00	250	226.865	226.87	-0.0045	0.126586			2017-08-10 14:09:59	250	226.688	226.679	0.0095	0.871127			2017-08-10 18:20:00	500	20736	21648.7	-912.65	0.359675
2017-06-01 04:15:00	255	226.867	226.869	-0.00249	0.191995			2017-08-10 14:14:59	255	226.691	226.678	0.01253	0.970995			2017-08-10 18:30:00	510	20736	21648.6	-912.643	0.359676
2017-06-01 04:20:00	260	226.867	226.869	-0.00248	0.19232			2017-08-10 14:19:59	260	226.69	226.678	0.01156	0.939024			2017-08-10 18:40:00	520	22400	21648.6	751.364	0.619662
2017-06-01 04:25:00	265	226.867	226.869	-0.00247	0.192646			2017-08-10 14:24:59	265	226.688	226.678	0.00959	0.874094			2017-08-10 18:50:00	530	22272	21648.6	623.371	0.599664
2017-06-01 04:30:00	270	226.865	226.869	-0.00446	0.127888			2017-08-10 14:29:59	270	226.689	226.678	0.01062	0.908042			2017-08-10 19:00:00	540	21248	21648.6	-400.622	0.439674
2017-06-01 04:35:00	275	226.863	226.869	-0.00645	0.0631305			2017-08-10 14:34:59	275	226.688	226.678	0.00965	0.876071			2017-08-10 19:10:00	550	21120	21648.6	-528.615	0.419677
2017-06-01 04:40:00	280	226.866	226.869	-0.00344	0.16108			2017-08-10 14:39:59	280	226.69	226.678	0.01168	0.94298			2017-08-10 19:20:00	560	22400	21648.6	751.392	0.619666
2017-06-01 04:45:00	285	226.864	226.869	-0.00543	0.0963228			2017-08-10 14:44:59	285	226.691	226.678	0.01271	0.976928			2017-08-10 19:30:00	570	20224	21648.6	-1424.6	0.279687
2017-06-01 04:50:00	290	226.865	226.869	-0.00442	0.12919			2017-08-10 14:49:59	290	226.688	226.678	0.00974	0.879038			2017-08-10 19:40:00	580	22016	21648.6	367.406	0.559672
2017-06-01 04:55:00	295	226.865	226.869	-0.00441	0.129515			2017-08-10 14:54:59	295	226.691	226.678	0.01277	0.978906			2017-08-10 19:50:00	590	20608	21648.6	-1040.59	0.339686
2017-06-01 05:00:00	300	226.862	226.869	-0.0074	0.0322161			2017-08-10 14:59:59	300	226.689	226.678	0.0108	0.913975			2017-08-10 20:00:00	600	22656	21648.6	1007.42	0.659668
2017-06-01 05:05:00	305	226.861	226.869	-0.00839	-6.46979e-13			2017-08-10 15:04:59	305	226.685	226.678	0.00683	0.783125			2017-08-10 20:10:00	610	22656	21648.6	1007.43	0.659669
2017-06-01 05:10:00	310	226.866	226.869	-0.00338	0.163033			2017-08-10 15:09:59	310	226.687	226.678	0.00886	0.850033			2017-08-10 20:20:00	620	20608	21648.6	-1040.57	0.339689
2017-06-01 05:15:00	315	226.865	226.869	-0.00437	0.130817			2017-08-10 15:14:59	315	226.687	226.678	0.00889	0.851022			2017-08-10 20:30:00	630	21376	21648.6	-272.559	0.459683
2017-06-01 05:20:00	320	226.866	226.869	-0.00336	0.163684			2017-08-10 15:19:59	320	226.691	226.678	0.01292	0.98385			2017-08-10 20:40:00	640	21248	21648.6	-400.552	0.439685
2017-06-01 05:25:00	325	226.864	226.869	-0.00535	0.0989261			2017-08-10 15:24:59	325	226.688	226.678	0.00995	0.885959			2017-08-10 20:50:00	650	20992	21648.5	-656.545	0.399689
2017-06-01 05:30:00	330	226.867	226.869	-0.00234	0.196876			2017-08-10 15:29:59	330	226.686	226.678	0.00798	0.821028			2017-08-10 21:00:00	660	21760	21648.5	111.462	0.519683
2017-06-01 05:35:00	335	226.866	226.869	-0.00333	0.16466			2017-08-10 15:34:59	335	226.685	226.678	0.00701	0.789057			2017-08-10 21:10:00	670	21888	21648.5	239.469	0.539683
2017-06-01 05:40:00	340	226.865	226.869	-0.00432	0.132444			2017-08-10 15:39:59	340	226.689	226.678	0.01104	0.921885			2017-08-10 21:20:00	680	21632	21648.5	-16.524	0.499686
2017-06-01 05:45:00	345	226.865	226.869	-0.00431	0.132769			2017-08-10 15:44:59	345	226.687	226.678	0.00907	0.856955			2017-08-10 21:30:00	690	20736	21648.5	-912.517	0.359695
2017-06-01 05:50:00	350	226.866	226.869	-0.0033	0.165636			2017-08-10 15:49:59	350	226.685	226.678	0.0071	0.792024			2017-08-10 21:40:00	700	21504	21648.5	-144.51	0.479689
2017-06-01 05:55:00	355	226.864	226.869	-0.00529	0.100879			2017-08-10 15:54:59	355	226.687	226.678	0.00913	0.858932			2017-08-10 21:50:00	710	22144	21648.5	495.497	0.579685
2017-06-01 06:00:00	360	226.866	226.869	-0.00328	0.166287			2017-08-10 15:59:59	360	226.686	226.678	0.00816	0.826961			2017-08-10 22:00:00	720	21120	21648.5	-528.496	0.419695
2017-06-01 06:05:00	365	226.866	226.869	-0.00327	0.166612			2017-08-10 16:04:59	365	226.688	226.678	0.01019	0.893869			2017-08-10 22:10:00	730	20864	21648.5	-784.489	0.379699
2017-06-01 06:10:00	370	226.867	226.869	-0.00226	0.199479			2017-08-10 16:09:59	370	226.684	226.678	0.00622	0.763019			2017-08-10 22:20:00	740	20992	21648.5	-656.482	0.399698
2017-06-01 06:15:00	375	226.863	226.869	-0.00625	0.0696388			2017-08-10 16:14:59	375	226.687	226.678	0.00925	0.862887			2017-08-10 22:30:00	750	21632	21648.5	-16.475	0.499694
2017-06-01 06:20:00	380	226.864	226.869	-0.00524	0.102506			2017-08-10 16:19:59	380	226.684	226.678	0.00628	0.764997			2017-08-10 22:40:00	760	20992	21648.5	-656.468	0.399701
2017-06-01 06:25:00	385	226.864	226.869	-0.00523	0.102831			2017-08-10 16:24:59	385	226.687	226.678	0.00931	0.864865			2017-08-10 22:50:00	770	22016	21648.5	367.539	0.559692
2017-06-01 06:30:00	390	226.862	226.869	-0.00722	0.0380735			2017-08-10 16:29:59	390	226.686	226.678	0.00834	0.832894			2017-08-10 23:00:00	780	21376	21648.5	-272.454	0.459699
2017-06-01 06:35:00	395	226.862	226.869	-0.00721	0.038399			2017-08-10 16:34:59	395	226.685	226.678	0.00737	0.800923			2017-08-10 23:10:00	790	20352	21648.4	-1296.45	0.29971
2017-06-01 06:40:00	400	226.868	226.869	-0.0012	0.233973			2017-08-10 16:39:59	400	226.688	226.678	0.0104	0.900791			2017-08-10 23:20:00	800	22272	21648.4	623.56	0.599693
2017-06-01 06:45:00	405	226.865	226.869	-0.00419	0.136674			2017-08-10 16:44:59	405	226.686	226.678	0.00843	0.83586			2017-08-10 23:30:00	810	20480	21648.4	-1168.43	0.319711
2017-06-01 06:50:00	410	226.865	226.869	-0.00418	0.137			2017-08-10 16:49:59	410	226.686	226.678	0.00846	0.836849			2017-08-10 23:40:00	820	20736	21648.4	-912.426	0.35971
2017-06-01 06:55:00	415	226.862	226.869	-0.00717	0.0397006			2017-08-10 16:54:59	415	226.683	226.678	0.00549	0.738958			2017-08-10 23:50:00	830	21120	21648.4	-528.419	0.419707
2017-06-01 07:00:00	420	226.866	226.869	-0.00316	0.170192			2017-08-10 16:59:59	420	226.686	226.677	0.00852	0.838827			2017-08-11	840	22656	21648.4	1007.59	0.659694
2017-06-01 07:05:00	425	226.864	226.869	-0.00515	0.105434			2017-08-10 17:04:59	425	226.687	226.677	0.00955	0.872775			2017-08-11 00:10:00	850	21888	21648.4	239.595	0.539702
2017-06-01 07:10:00	430	226.865	226.869	-0.00414	0.138301			2017-08-10 17:09:59	430	226.686	226.677	0.00858	0.840804			2017-08-11 00:20:00	860	22272	21648.4	623.602	0.5997
2017-06-01 07:15:00	435	226.867	226.869	-0.00213	0.20371			2017-08-10 17:14:59	435	226.683	226.677	0.00561	0.742914			2017-08-11 00:30:00	870	22144	21648.4	495.609	0.579702
2017-06-01 07:20:00	440	226.867	226.869	-0.00212	0.204035			2017-08-10 17:19:59	440	226.685	226.677	0.00764	0.809822			2017-08-11 00:40:00	880	21504	21648.4	-144.384	0.479709
2017-06-01 07:25:00	445	226.866	226.869	-0.00311	0.171819			2017-08-10 17:24:59	445	226.686	226.677	0.00867	0.843771			2017-08-11 00:50:00	890	22016	21648.4	367.623	0.559706
2017-06-01 07:30:00	450	226.865	226.869	-0.0041	0.139603			2017-08-10 17:29:59	450	226.686	226.677	0.0087	0.844759			2017-08-11 01:00:00	900	22656	21648.4	1007.63	0.659701
2017-06-01 07:35:00	455	226.866	226.869	-0.00309	0.17247			2017-08-10 17:34:59	455	226.686	226.677	0.00873	0.845748			2017-08-11 01:10:00	910	20224	21648.4	-1424.36	0.279724
2017-06-01 07:40:00	460	226.865	226.869	-0.00408	0.140254			2017-08-10 17:39:59	460	226.687	226.677	0.00976	0.879697			2017-08-11 01:20:00	920	20480	21648.4	-1168.36	0.319723
2017-06-01 07:45:00	465	226.866	226.869	-0.00307	0.173121			2017-08-10 17:44:59	465	226.687	226.677	0.00979	0.880686			2017-08-11 01:30:00	930	22144	21648.3	495.651	0.579709
2017-06-01 07:50:00	470	226.867	226.869	-0.00206	0.205988			2017-08-10 17:49:59	470	226.687	226.677	0.00982	0.881674			2017-08-11 01:40:00	940	22016	21648.3	367.658	0.559711
2017-06-01 07:55:00	475	226.866	226.869	-0.00305	0.173772			2017-08-10 17:54:59	475	226.683	226.677	0.00585	0.750824			2017-08-11 01:50:00	950	20992	21648.3	-656.335	0.399721
2017-06-01 08:00:00	480	226.866	226.869	-0.00304	0.174097			2017-08-10 17:59:59	480	226.684	226.677	0.00688	0.784773			2017-08-11 02:00:00	960	21632	21648.3	-16.328	0.499717
2017-06-01 08:05:00	485	226.865	226.869	-0.00403	0.141881			2017-08-10 18:04:59	485	226.686	226.677	0.00891	0.851681			2017-08-11 02:10:00	970	21888	21648.3	239.679	0.539716
2017-06-01 08:10:00	490	226.866	226.869	-0.00302	0.174748			2017-08-10 18:09:59	490	226.684	226.677	0.00694	0.78675			2017-08-11 02:20:00	980	21376	21648.3	-272.314	0.459721
2017-06-01 08:15:00	495	226.865	226.869	-0.00401	0.142532			2017-08-10 18:14:59	495	226.685	226.677	0.00797	0.820699			2017-08-11 02:30:00	990	21632	21648.3	-16.307	0.49972
2017-06-01 08:20:00	500	226.866	226.869	-0.003	0.175399			2017-08-10 18:19:59	500	226.683	226.677	0.006	0.755768			2017-08-11 02:40:00	1000	22656	21648.3	1007.7	0.659712
2017-06-01 08:25:00	505	226.866	226.869	-0.00299	0.175724			2017-08-10 18:24:59	505	226.685	226.677	0.00803	0.822676			2017-08-11 02:50:00	1010	22400	21648.3	751.707	0.619715
2017-06-01 08:30:00	510	226.867	226.869	-0.00198	0.208591			2017-08-10 18:29:59	510	226.686	226.677	0.00906	0.856625			2017-08-11 03:00:00	1020	21504	21648.3	-144.286	0.479724
2017-06-01 08:35:00	515	226.867	226.869	-0.00197	0.208916			2017-08-10 18:34:59	515	226.684	226.677	0.00709	0.791694			2017-08-11 03:10:00	1030	21376	21648.3	-272.279	0.459727
2017-06-01 08:40:00	520	226.868	226.869	-0.00096	0.241783			2017-08-10 18:39:59	520	226.683	226.677	0.00612	0.759723			2017-08-11 03:20:00	1040	22016	21648.3	367.728	0.559722
2017-06-01 08:45:00	525	226.867	226.869	-0.00195	0.209567			2017-08-10 18:44:59	525	226.682	226.677	0.00515	0.727752			2017-08-11 03:30:00	1050	20864	21648.3	-784.265	0.379734
2017-06-01 08:50:00	530	226.866	226.869	-0.00294	0.177351			2017-08-10 18:49:59	530	226.684	226.677	0.00718	0.794661			2017-08-11 03:40:00	1060	23168	21648.3	1519.74	0.739714
2017-06-01 08:55:00	535	226.867	226.869	-0.00193	0.210218			2017-08-10 18:54:59	535	226.683	226.677	0.00621	0.76269			2017-08-11 03:50:00	1070	21504	21648.3	-144.251	0.47973
2017-06-01 09:00:00	540	226.867	226.869	-0.00192	0.210543			2017-08-10 18:59:59	540	226.687	226.677	0.01024	0.895517			2017-08-11 04:00:00	1080	22016	21648.2	367.756	0.559726
2017-06-01 09:05:00	545	226.868	226.869	-0.00091	0.24341			2017-08-10 19:04:59	545	226.686	226.677	0.00927	0.863546			2017-08-11 04:10:00	1090	21120	21648.2	-528.237	0.419736
2017-06-01 09:10:00	550	226.869	226.869	0.0001	0.276277			2017-08-10 19:09:59	550	226.685	226.677	0.0083	0.831575			2017-08-11 04:20:00	1100	22400	21648.2	751.77	0.619725
2017-06-01 09:15:00	555	226.868	226.869	-0.00089	0.244061			2017-08-10 19:14:59	555	226.684	226.677	0.00733	0.799604			2017-08-11 04:30:00	1110	20224	21648.2	-1424.22	0.279746
2017-06-01 09:20:00	560	226.867	226.869	-0.00188	0.211845			2017-08-10 19:19:59	560	226.685	226.677	0.00836	0.833553			2017-08-11 04:40:00	1120	22272	21648.2	623.784	0.599728
2017-06-01 09:25:00	565	226.868	226.869	-0.00087	0.244712			2017-08-10 19:24:59	565	226.686	226.677	0.00939	0.867502			2017-08-11 04:50:00	1130	19840	21648.2	-1808.21	0.219752
2017-06-01 09:30:00	570	226.865	226.869	-0.00386	0.147413			2017-08-10 19:29:59	570	226.686	226.677	0.00942	0.86849			2017-08-11 05:00:00	1140	20096	21648.2	-1552.2	0.25975
2017-06-01 09:35:00	575	226.867	226.869	-0.00185	0.212821			2017-08-10 19:34:59	575	226.682	226.677	0.00545	0.73764			2017-08-11 05:10:00	1150	21760	21648.2	111.805	0.519736
2017-06-01 09:40:00	580	226.866	226.869	-0.00284	0.180605			2017-08-10 19:39:59	580	226.681	226.677	0.00448	0.705669			2017-08-11 05:20:00	1160	23168	21648.2	1519.81	0.739725
2017-06-01 09:45:00	585	226.867	226.869	-0.00183	0.213472			2017-08-10 19:44:59	585	226.682	226.676	0.00551	0.739618			2017-08-11 05:30:00	1170	21376	21648.2	-272.181	0.459742
2017-06-01 09:50:00	590	226.867	226.869	-0.00182	0.213798			2017-08-10 19:49:59	590	226.684	226.676	0.00754	0.806526			2017-08-11 05:40:00	1180	21504	21648.2	-144.174	0.479742
2017-06-01 09:55:00	595	226.868	226.869	-0.00081	0.246664			2017-08-10 19:54:59	595	226.684	226.676	0.00757	0.807515			2017-08-11 05:50:00	1190	21888	21648.2	239.833	0.53974
2017-06-01 10:00:00	600	226.866	226.869	-0.0028	0.181907			2017-08-10 19:59:59	600	226.683	226.676	0.0066	0.775544			2017-08-11 06:00:00	1200	22400	21648.2	751.84	0.619736
2017-06-01 10:05:00	605	226.868	226.869	-0.00079	0.247315			2017-08-10 20:04:59	605	226.684	226.676	0.00763	0.809492			2017-08-11 06:10:00	1210	22784	21648.2	1135.85	0.679734
2017-06-01 10:10:00	610	226.87	226.869	0.00122	0.312724			2017-08-10 20:09:59	610	226.684	226.676	0.00766	0.810481			2017-08-11 06:20:00	1220	21632	21648.1	-16.146	0.499745
2017-06-01 10:15:00	615	226.867	226.869	-0.00177	0.215425			2017-08-10 20:14:59	615	226.681	226.676	0.00469	0.712591			2017-08-11 06:30:00	1230	21376	21648.1	-272.139	0.459749
2017-06-01 10:20:00	620	226.87	226.869	0.00124	0.313375			2017-08-10 20:19:59	620	226.684	226.676	0.00772	0.812459			2017-08-11 06:40:00	1240	21504	21648.1	-144.132	0.479749
2017-06-01 10:25:00	625	226.87	226.869	0.00125	0.3137			2017-08-10 20:24:59	625	226.683	226.676	0.00675	0.780488			2017-08-11 06:50:00	1250	21760	21648.1	111.875	0.519747
2017-06-01 10:30:00	630	226.866	226.869	-0.00274	0.183859			2017-08-10 20:29:59	630	226.682	226.676	0.00578	0.748517			2017-08-11 07:00:00	1260	20608	21648.1	-1040.12	0.339759
2017-06-01 10:35:00	635	226.867	226.869	-0.00173	0.216726			2017-08-10 20:34:59	635	226.683	226.676	0.00681	0.782465			2017-08-11 07:10:00	1270	21888	21648.1	239.889	0.539748
2017-06-01 10:40:00	640	226.87	226.869	0.00128	0.314676			2017-08-10 20:39:59	640	226.684	226.676	0.00784	0.816414			2017-08-11 07:20:00	1280	20736	21648.1	-912.104	0.35976
2017-06-01 10:45:00	645	226.87	226.869	0.00129	0.315002			2017-08-10 20:44:59	645	226.681	226.676	0.00487	0.718523			2017-08-11 07:30:00	1290	19968	21648.1	-1680.1	0.239768
2017-06-01 10:50:00	650	226.87	226.869	0.0013	0.315327			2017-08-10 20:49:59	650	226.683	226.676	0.0069	0.785432			2017-08-11 07:40:00	1300	21888	21648.1	239.91	0.539752
2017-06-01 10:55:00	655	226.868	226.869	-0.00069	0.250569			2017-08-10 20:54:59	655	226.683	226.676	0.00693	0.786421			2017-08-11 07:50:00	1310	21376	21648.1	-272.083	0.459757
2017-06-01 11:00:00	660	226.871	226.869	0.00232	0.348519			2017-08-10 20:59:59	660	226.683	226.676	0.00696	0.787409			2017-08-11 08:00:00	1320	21376	21648.1	-272.076	0.459758
2017-06-01 11:05:00	665	226.871	226.869	0.00233	0.348845			2017-08-10 21:04:59	665	226.682	226.676	0.00599	0.755438			2017-08-11 08:10:00	1330	21888	21648.1	239.931	0.539755
2017-06-01 11:10:00	670	226.869	226.869	0.00034	0.284087			2017-08-10 21:09:59	670	226.682	226.676	0.00602	0.756427			2017-08-11 08:20:00	1340	21760	21648.1	111.938	0.519757
2017-06-01 11:15:00	675	226.871	226.869	0.00235	0.349496			2017-08-10 21:14:59	675	226.681	226.676	0.00505	0.724456			2017-08-11 08:30:00	1350	21760	21648.1	111.945	0.519758
2017-06-01 11:20:00	680	226.87	226.869	0.00136	0.31728			2017-08-10 21:19:59	680	226.682	226.676	0.00608	0.758405			2017-08-11 08:40:00	1360	21504	21648	-144.048	0.479762
2017-06-01 11:25:00	685	226.872	226.869	0.00337	0.382688			2017-08-10 21:24:59	685	226.683	226.676	0.00711	0.792353			2017-08-11 08:50:00	1370	21888	21648	239.959	0.539759
2017-06-01 11:30:00	690	226.868	226.869	-0.00062	0.252847			2017-08-10 21:29:59	690	226.681	226.676	0.00514	0.727423			2017-08-11 09:00:00	1380	21120	21648	-528.034	0.419767
2017-06-01 11:35:00	695	226.869	226.869	0.00039	0.285714			2017-08-10 21:34:59	695	226.681	226.676	0.00517	0.728411			2017-08-11 09:10:00	1390	21376	21648	-272.027	0.459766
2017-06-01 11:40:00	700	226.87	226.869	0.0014	0.318581			2017-08-10 21:39:59	700	226.682	226.676	0.0062	0.76236			2017-08-11 09:20:00	1400	22144	21648	495.98	0.57976
2017-06-01 11:45:00	705	226.87	226.869	0.00141	0.318907			2017-08-10 21:44:59	705	226.68	226.676	0.00423	0.697429			2017-08-11 09:30:00	1410	22144	21648	495.987	0.579761
2017-06-01 11:50:00	710	226.869	226.869	0.00042	0.286691			2017-08-10 21:49:59	710	226.682	226.676	0.00626	0.764338			2017-08-11 09:40:00	1420	19968	21648	-1680.01	0.239782
2017-06-01 11:55:00	715	226.868	226.869	-0.00057	0.254474			2017-08-10 21:54:59	715	226.679	226.676	0.00329	0.666447			2017-08-11 09:50:00	1430	20096	21648	-1552	0.259782
2017-06-01 12:00:00	720	226.869	226.869	0.00044	0.287341			2017-08-10 21:59:59	720	226.68	226.676	0.00432	0.700396			2017-08-11 10:00:00	1440	21504	21648	-143.992	0.47977
2017-06-01 12:05:00	725	226.87	226.869	0.00145	0.320208			2017-08-10 22:04:59	725	226.68	226.676	0.00435	0.701384			2017-08-11 10:10:00	1450	22272	21648	624.015	0.599765
2017-06-01 12:10:00	730	226.871	226.869	0.00246	0.353075			2017-08-10 22:09:59	730	226.679	226.676	0.00338	0.669413			2017-08-11 10:20:00	1460	21248	21648	-399.978	0.439775
2017-06-01 12:15:00	735	226.872	226.869	0.00347	0.385942			2017-08-10 22:14:59	735	226.678	226.676	0.00241	0.637442			2017-08-11 10:30:00	1470	21504	21648	-143.971	0.479774
2017-06-01 12:20:00	740	226.871	226.869	0.00248	0.353726			2017-08-10 22:19:59	740	226.683	226.676	0.00744	0.80323			2017-08-11 10:40:00	1480	20736	21648	-911.964	0.359782
2017-06-01 12:25:00	745	226.87	226.869	0.00149	0.32151			2017-08-10 22:24:59	745	226.679	226.676	0.00347	0.67238			2017-08-11 10:50:00	1490	21376	21648	-271.957	0.459777
2017-06-01 12:30:00	750	226.87	226.869	0.0015	0.321835			2017-08-10 22:29:59	750	226.682	226.675	0.0065	0.772248			2017-08-11 11:00:00	1500	21248	21648	-399.95	0.439779
2017-06-01 12:35:00	755	226.869	226.868	0.00051	0.289619			2017-08-10 22:34:59	755	226.679	226.675	0.00353	0.674357			2017-08-11 11:10:00	1510	21760	21647.9	112.057	0.519776
2017-06-01 12:40:00	760	226.871	226.868	0.00252	0.355028			2017-08-10 22:39:59	760	226.676	226.675	0.00056	0.576467			2017-08-11 11:20:00	1520	21888	21647.9	240.064	0.539776
2017-06-01 12:45:00	765	226.87	226.868	0.00153	0.322812			2017-08-10 22:44:59	765	226.68	226.675	0.00459	0.709295			2017-08-11 11:30:00	1530	21632	21647.9	-15.929	0.499779
2017-06-01 12:50:00	770	226.872	226.868	0.00354	0.38822			2017-08-10 22:49:59	770	226.678	226.675	0.00262	0.644364			2017-08-11 11:40:00	1540	19584	21647.9	-2063.92	0.179799
2017-06-01 12:55:00	775	226.872	226.868	0.00355	0.388545			2017-08-10 22:54:59	775	226.68	226.675	0.00465	0.711272			2017-08-11 11:50:00	1550	20096	21647.9	-1551.92	0.259795
2017-06-01 13:00:00	780	226.873	226.868	0.00456	0.421412			2017-08-10 22:59:59	780	226.68	226.675	0.00468	0.712261			2017-08-11 12:00:00	1560	21504	21647.9	-143.908	0.479784
2017-06-01 13:05:00	785	226.868	226.868	-0.00043	0.25903			2017-08-10 23:04:59	785	226.68	226.675	0.00471	0.71325			2017-08-11 12:10:00	1570	21632	21647.9	-15.901	0.499783
2017-06-01 13:10:00	790	226.871	226.868	0.00258	0.35698			2017-08-10 23:09:59	790	226.678	226.675	0.00274	0.648319			2017-08-11 12:20:00	1580	21376	21647.9	-271.894	0.459787
2017-06-01 13:15:00	795	226.871	226.868	0.00259	0.357306			2017-08-10 23:14:59	795	226.681	226.675	0.00577	0.748187			2017-08-11 12:30:00	1590	20736	21647.9	-911.887	0.359794
2017-06-01 13:20:00	800	226.87	226.868	0.0016	0.325089			2017-08-10 23:19:59	800	226.681	226.675	0.0058	0.749176			2017-08-11 12:40:00	1600	22016	21647.9	368.12	0.559783
2017-06-01 13:25:00	805	226.869	226.868	0.00061	0.292873			2017-08-10 23:24:59	805	226.679	226.675	0.00383	0.684245			2017-08-11 12:50:00	1610	21632	21647.9	-15.873	0.499788
2017-06-01 13:30:00	810	226.872	226.868	0.00362	0.390823			2017-08-10 23:29:59	810	226.68	226.675	0.00486	0.718194			2017-08-11 13:00:00	1620	19968	21647.9	-1679.87	0.239804
2017-06-01 13:35:00	815	226.872	226.868	0.00363	0.391149			2017-08-10 23:34:59	815	226.679	226.675	0.00389	0.686223			2017-08-11 13:10:00	1630	20736	21647.9	-911.859	0.359798
2017-06-01 13:40:00	820	226.873	226.868	0.00464	0.424016			2017-08-10 23:39:59	820	226.68	226.675	0.00492	0.720171			2017-08-11 13:20:00	1640	21248	21647.9	-399.852	0.439795
2017-06-01 13:45:00	825	226.871	226.868	0.00265	0.359258			2017-08-10 23:44:59	825	226.678	226.675	0.00295	0.655241			2017-08-11 13:30:00	1650	20864	21647.8	-783.845	0.379799
2017-06-01 13:50:00	830	226.871	226.868	0.00266	0.359583			2017-08-10 23:49:59	830	226.682	226.675	0.00698	0.788069			2017-08-11 13:40:00	1660	22400	21647.8	752.162	0.619786
2017-06-01 13:55:00	835	226.868	226.868	-0.00033	0.262284			2017-08-10 23:54:59	835	226.677	226.675	0.00201	0.624258			2017-08-11 13:50:00	1670	21248	21647.8	-399.831	0.439798
2017-06-01 14:00:00	840	226.872	226.868	0.00368	0.392776			2017-08-10 23:59:59	840	226.682	226.675	0.00704	0.790046			2017-08-11 14:00:00	1680	20864	21647.8	-783.824	0.379802
2017-06-01 14:05:00	845	226.87	226.868	0.00169	0.328018			2017-08-11 00:04:59	845	226.68	226.675	0.00507	0.725115			2017-08-11 14:10:00	1690	20864	21647.8	-783.817	0.379804
2017-06-01 14:10:00	850	226.871	226.868	0.0027	0.360885			2017-08-11 00:09:59	850	226.68	226.675	0.0051	0.726104			2017-08-11 14:20:00	1700	22400	21647.8	752.19	0.619791
2017-06-01 14:15:00	855	226.868	226.868	-0.00029	0.263586			2017-08-11 00:14:59	855	226.681	226.675	0.00613	0.760053			2017-08-11 14:30:00	1710	21376	21647.8	-271.803	0.459801
2017-06-01 14:20:00	860	226.87	226.868	0.00172	0.328994			2017-08-11 00:19:59	860	226.678	226.675	0.00316	0.662162			2017-08-11 14:40:00	1720	21760	21647.8	112.204	0.519799
2017-06-01 14:25:00	865	226.872	226.868	0.00373	0.394403			2017-08-11 00:24:59	865	226.678	226.675	0.00319	0.663151			2017-08-11 14:50:00	1730	22912	21647.8	1264.21	0.699789
2017-06-01 14:30:00	870	226.869	226.868	0.00074	0.297104			2017-08-11 00:29:59	870	226.68	226.675	0.00522	0.730059			2017-08-11 15:00:00	1740	22400	21647.8	752.218	0.619795
2017-06-01 14:35:00	875	226.87	226.868	0.00175	0.329971			2017-08-11 00:34:59	875	226.68	226.675	0.00525	0.731048			2017-08-11 15:10:00	1750	22144	21647.8	496.225	0.579799
2017-06-01 14:40:00	880	226.872	226.868	0.00376	0.395379			2017-08-11 00:39:59	880	226.678	226.675	0.00328	0.666117			2017-08-11 15:20:00	1760	19840	21647.8	-1807.77	0.21982
2017-06-01 14:45:00	885	226.872	226.868	0.00377	0.395705			2017-08-11 00:44:59	885	226.68	226.675	0.00531	0.733026			2017-08-11 15:30:00	1770	20736	21647.8	-911.761	0.359813
2017-06-01 14:50:00	890	226.871	226.868	0.00278	0.363488			2017-08-11 00:49:59	890	226.679	226.675	0.00434	0.701055			2017-08-11 15:40:00	1780	20480	21647.8	-1167.75	0.319817
2017-06-01 14:55:00	895	226.874	226.868	0.00579	0.461438			2017-08-11 00:54:59	895	226.681	226.675	0.00637	0.767963			2017-08-11 15:50:00	1790	22016	21647.7	368.253	0.559804
2017-06-01 15:00:00	900	226.871	226.868	0.0028	0.364139			2017-08-11 00:59:59	900	226.68	226.675	0.0054	0.735992			2017-08-11 16:00:00	1800	22144	21647.7	496.26	0.579804
2017-06-01 15:05:00	905	226.869	226.868	0.00081	0.299382			2017-08-11 01:04:59	905	226.677	226.675	0.00243	0.638102			2017-08-11 16:10:00	1810	21120	21647.7	-527.733	0.419814
2017-06-01 15:10:00	910	226.868	226.868	-0.00018	0.267166			2017-08-11 01:09:59	910	226.679	226.675	0.00446	0.70501			2017-08-11 16:20:00	1820	21120	21647.7	-527.726	0.419815
2017-06-01 15:15:00	915	226.87	226.868	0.00183	0.332574			2017-08-11 01:14:59	915	226.675	226.675	0.00049	0.57416			2017-08-11 16:30:00	1830	21760	21647.7	112.281	0.519811
2017-06-01 15:20:00	920	226.868	226.868	-0.00016	0.267816			2017-08-11 01:19:59	920	226.679	226.674	0.00452	0.706987			2017-08-11 16:40:00	1840	20608	21647.7	-1039.71	0.339822
2017-06-01 15:25:00	925	226.87	226.868	0.00185	0.333225			2017-08-11 01:24:59	925	226.679	226.674	0.00455	0.707976			2017-08-11 16:50:00	1850	20224	21647.7	-1423.71	0.279827
2017-06-01 15:30:00	930	226.868	226.868	-0.00014	0.268467			2017-08-11 01:29:59	930	226.679	226.674	0.00458	0.708965			2017-08-11 17:00:00	1860	21504	21647.7	-143.698	0.479816
2017-06-01 15:35:00	935	226.871	226.868	0.00287	0.366417			2017-08-11 01:34:59	935	226.676	226.674	0.00161	0.611074			2017-08-11 17:10:00	1870	20736	21647.7	-911.691	0.359824
2017-06-01 15:40:00	940	226.87	226.868	0.00188	0.334201			2017-08-11 01:39:59	940	226.677	226.674	0.00264	0.645023			2017-08-11 17:20:00	1880	20224	21647.7	-1423.68	0.27983
2017-06-01 15:45:00	945	226.872	226.868	0.00389	0.39961			2017-08-11 01:44:59	945	226.68	226.674	0.00567	0.744891			2017-08-11 17:30:00	1890	22144	21647.7	496.323	0.579814
2017-06-01 15:50:00	950	226.871	226.868	0.0029	0.367393			2017-08-11 01:49:59	950	226.677	226.674	0.0027	0.647001			2017-08-11 17:40:00	1900	21888	21647.7	240.33	0.539817
2017-06-01 15:55:00	955	226.871	226.868	0.00291	0.367719			2017-08-11 01:54:59	955	226.676	226.674	0.00173	0.61503			2017-08-11 17:50:00	1910	22016	21647.7	368.337	0.559817
2017-06-01 16:00:00	960	226.873	226.868	0.00492	0.433127			2017-08-11 01:59:59	960	226.678	226.674	0.00376	0.681938			2017-08-11 18:00:00	1920	20096	21647.7	-1551.66	0.259836
2017-06-01 16:05:00	965	226.869	226.868	0.00093	0.303287			2017-08-11 02:04:59	965	226.678	226.674	0.00379	0.682927			2017-08-11 18:10:00	1930	22400	21647.6	752.351	0.619816
2017-06-01 16:10:00	970	226.87	226.868	0.00194	0.336154			2017-08-11 02:09:59	970	226.677	226.674	0.00282	0.650956			2017-08-11 18:20:00	1940	20864	21647.6	-783.642	0.379831
2017-06-01 16:15:00	975	226.874	226.868	0.00595	0.466645			2017-08-11 02:14:59	975	226.676	226.674	0.00185	0.618985			2017-08-11 18:30:00	1950	20992	21647.6	-655.635	0.399831
2017-06-01 16:20:00	980	226.871	226.868	0.00296	0.369346			2017-08-11 02:19:59	980	226.678	226.674	0.00388	0.685893			2017-08-11 18:40:00	1960	21120	21647.6	-527.628	0.419831
2017-06-01 16:25:00	985	226.871	226.868	0.00297	0.369671			2017-08-11 02:24:59	985	226.678	226.674	0.00391	0.686882			2017-08-11 18:50:00	1970	21504	21647.6	-143.621	0.479828
2017-06-01 16:30:00	990	226.87	226.868	0.00198	0.337455			2017-08-11 02:29:59	990	226.678	226.674	0.00394	0.687871			2017-08-11 19:00:00	1980	20608	21647.6	-1039.61	0.339838
2017-06-01 16:35:00	995	226.87	226.868	0.00199	0.337781			2017-08-11 02:34:59	995	226.677	226.674	0.00297	0.6559			2017-08-11 19:10:00	1990	21888	21647.6	240.393	0.539827
2017-06-01 16:40:00	1000	226.871	226.868	0.003	0.370648			2017-08-11 02:39:59	1000	226.678	226.674	0.004	0.689848			2017-08-11 19:20:00	2000	21248	21647.6	-399.6	0.439834
2017-06-01 16:45:00	1005	226.87	226.868	0.00201	0.338432			2017-08-11 02:44:59	1005	226.677	226.674	0.00303	0.657877			2017-08-11 19:30:00	2010	20096	21647.6	-1551.59	0.259845
2017-06-01 16:50:00	1010	226.868	226.868	2e-05	0.273674			2017-08-11 02:49:59	1010	226.679	226.674	0.00506	0.724786			2017-08-11 19:40:00	2020	22272	21647.6	624.414	0.599827
2017-06-01 16:55:00	1015	226.87	226.868	0.00203	0.339082			2017-08-11 02:54:59	1015	226.679	226.674	0.00509	0.725775			2017-08-11 19:50:00	2030	20352	21647.6	-1295.58	0.299845
2017-06-01 17:00:00	1020	226.872	226.868	0.00404	0.404491			2017-08-11 02:59:59	1020	226.677	226.674	0.00312	0.660844			2017-08-11 20:00:00	2040	20352	21647.6	-1295.57	0.299846
2017-06-01 17:05:00	1025	226.868	226.868	5e-05	0.27465			2017-08-11 03:04:59	1025	226.68	226.674	0.00615	0.760712			2017-08-11 20:10:00	2050	23040	21647.6	1392.44	0.719823
2017-06-01 17:10:00	1030	226.872	226.868	0.00406	0.405142			2017-08-11 03:09:59	1030	226.677	226.674	0.00318	0.662821			2017-08-11 20:20:00	2060	22016	21647.6	368.442	0.559834
2017-06-01 17:15:00	1035	226.869	226.868	0.00107	0.307842			2017-08-11 03:14:59	1035	226.679	226.674	0.00521	0.72973			2017-08-11 20:30:00	2070	22400	21647.6	752.449	0.619831
2017-06-01 17:20:00	1040	226.87	226.868	0.00208	0.340709			2017-08-11 03:19:59	1040	226.677	226.674	0.00324	0.664799			2017-08-11 20:40:00	2080	22784	21647.5	1136.46	0.679829
2017-06-01 17:25:00	1045	226.867	226.868	-0.00091	0.24341			2017-08-11 03:24:59	1045	226.677	226.674	0.00327	0.665788			2017-08-11 20:50:00	2090	21376	21647.5	-271.537	0.459843
2017-06-01 17:30:00	1050	226.868	226.868	0.0001	0.276277			2017-08-11 03:29:59	1050	226.676	226.674	0.0023	0.633817			2017-08-11 21:00:00	2100	21120	21647.5	-527.53	0.419846
2017-06-01 17:35:00	1055	226.868	226.868	0.00011	0.276603			2017-08-11 03:34:59	1055	226.678	226.674	0.00433	0.700725			2017-08-11 21:10:00	2110	21376	21647.5	-271.523	0.459845
2017-06-01 17:40:00	1060	226.871	226.868	0.00312	0.374553			2017-08-11 03:39:59	1060	226.677	226.674	0.00336	0.668754			2017-08-11 21:20:00	2120	21120	21647.5	-527.516	0.419848
2017-06-01 17:45:00	1065	226.868	226.868	0.00013	0.277253			2017-08-11 03:44:59	1065	226.677	226.674	0.00339	0.669743			2017-08-11 21:30:00	2130	22400	21647.5	752.491	0.619838
2017-06-01 17:50:00	1070	226.871	226.868	0.00314	0.375203			2017-08-11 03:49:59	1070	226.679	226.674	0.00542	0.736651			2017-08-11 21:40:00	2140	20992	21647.5	-655.502	0.399852
2017-06-01 17:55:00	1075	226.868	226.868	0.00015	0.277904			2017-08-11 03:54:59	1075	226.678	226.674	0.00445	0.70468			2017-08-11 21:50:00	2150	21504	21647.5	-143.495	0.479848
2017-06-01 18:00:00	1080	226.87	226.868	0.00216	0.343313			2017-08-11 03:59:59	1080	226.677	226.674	0.00348	0.672709			2017-08-11 22:00:00	2160	20992	21647.5	-655.488	0.399854
2017-06-01 18:05:00	1085	226.867	226.868	-0.00083	0.246014			2017-08-11 04:04:59	1085	226.675	226.673	0.00151	0.607779			2017-08-11 22:10:00	2170	22656	21647.5	1008.52	0.65984
2017-06-01 18:10:00	1090	226.87	226.868	0.00218	0.343964			2017-08-11 04:09:59	1090	226.674	226.673	0.00054	0.575808			2017-08-11 22:20:00	2180	20608	21647.5	-1039.47	0.339859
2017-06-01 18:15:00	1095	226.868	226.868	0.00019	0.279206			2017-08-11 04:14:59	1095	226.674	226.673	0.00057	0.576796			2017-08-11 22:30:00	2190	20864	21647.5	-783.467	0.379858
2017-06-01 18:20:00	1100	226.868	226.868	0.0002	0.279531			2017-08-11 04:19:59	1100	226.678	226.673	0.0046	0.709624			2017-08-11 22:40:00	2200	22272	21647.5	624.54	0.599847
2017-06-01 18:25:00	1105	226.869	226.868	0.00121	0.312398			2017-08-11 04:24:59	1105	226.676	226.673	0.00263	0.644693			2017-08-11 22:50:00	2210	20864	21647.5	-783.453	0.37986
2017-06-01 18:30:00	1110	226.871	226.868	0.00322	0.377807			2017-08-11 04:29:59	1110	226.675	226.673	0.00166	0.612722			2017-08-11 23:00:00	2220	22272	21647.4	624.554	0.599849
2017-06-01 18:35:00	1115	226.871	226.868	0.00323	0.378132			2017-08-11 04:34:59	1115	226.678	226.673	0.00469	0.712591			2017-08-11 23:10:00	2230	21504	21647.4	-143.439	0.479857
2017-06-01 18:40:00	1120	226.871	226.868	0.00324	0.378458			2017-08-11 04:39:59	1120	226.677	226.673	0.00372	0.68062			2017-08-11 23:20:00	2240	22528	21647.4	880.568	0.639849
2017-06-01 18:45:00	1125	226.869	226.868	0.00125	0.3137			2017-08-11 04:44:59	1125	226.675	226.673	0.00175	0.615689			2017-08-11 23:30:00	2250	21120	21647.4	-527.425	0.419862
2017-06-01 18:50:00	1130	226.869	226.868	0.00126	0.314025			2017-08-11 04:49:59	1130	226.676	226.673	0.00278	0.649637			2017-08-11 23:40:00	2260	20608	21647.4	-1039.42	0.339868
2017-06-01 18:55:00	1135	226.87	226.868	0.00227	0.346892			2017-08-11 04:54:59	1135	226.675	226.673	0.00181	0.617666			2017-08-11 23:50:00	2270	22272	21647.4	624.589	0.599854
2017-06-01 19:00:00	1140	226.871	226.868	0.00328	0.379759			2017-08-11 04:59:59	1140	226.679	226.673	0.00584	0.750494			2017-08-12	2280	21888	21647.4	240.596	0.539859
2017-06-01 19:05:00	1145	226.871	226.868	0.00329	0.380085			2017-08-11 05:04:59	1145	226.676	226.673	0.00287	0.652604			2017-08-12 00:10:00	2290	20864	21647.4	-783.397	0.379869
2017-06-01 19:10:00	1150	226.868	226.868	0.0003	0.282786			2017-08-11 05:09:59	1150	226.677	226.673	0.0039	0.686552			2017-08-12 00:20:00	2300	21632	21647.4	-15.39	0.499863
2017-06-01 19:15:00	1155	226.87	226.868	0.00231	0.348194			2017-08-11 05:14:59	1155	226.676	226.673	0.00293	0.654581			2017-08-12 00:30:00	2310	21504	21647.4	-143.383	0.479866
2017-06-01 19:20:00	1160	226.87	226.868	0.00232	0.348519			2017-08-11 05:19:59	1160	226.678	226.673	0.00496	0.72149			2017-08-12 00:40:00	2320	20992	21647.4	-655.376	0.399871
2017-06-01 19:25:00	1165	226.87	226.868	0.00233	0.348845			2017-08-11 05:24:59	1165	226.674	226.673	0.00099	0.590639			2017-08-12 00:50:00	2330	22016	21647.4	368.631	0.559863
2017-06-01 19:30:00	1170	226.871	226.868	0.00334	0.381712			2017-08-11 05:29:59	1170	226.673	226.673	2e-05	0.558668			2017-08-12 01:00:00	2340	19840	21647.4	-1807.36	0.219884
2017-06-01 19:35:00	1175	226.871	226.868	0.00335	0.382037			2017-08-11 05:34:59	1175	226.676	226.673	0.00305	0.658537			2017-08-12 01:10:00	2350	20992	21647.4	-655.355	0.399875
2017-06-01 19:40:00	1180	226.87	226.868	0.00236	0.349821			2017-08-11 05:39:59	1180	226.678	226.673	0.00508	0.725445			2017-08-12 01:20:00	2360	21248	21647.3	-399.348	0.439873
2017-06-01 19:45:00	1185	226.867	226.868	-0.00063	0.252522			2017-08-11 05:44:59	1185	226.675	226.673	0.00211	0.627554			2017-08-12 01:30:00	2370	22016	21647.3	368.659	0.559867
2017-06-01 19:50:00	1190	226.871	226.868	0.00338	0.383013			2017-08-11 05:49:59	1190	226.677	226.673	0.00414	0.694463			2017-08-12 01:40:00	2380	21248	21647.3	-399.334	0.439876
2017-06-01 19:55:00	1195	226.869	226.868	0.00139	0.318256			2017-08-11 05:54:59	1195	226.676	226.673	0.00317	0.662492			2017-08-12 01:50:00	2390	20480	21647.3	-1167.33	0.319884
2017-06-01 20:00:00	1200	226.867	226.868	-0.0006	0.253498			2017-08-11 05:59:59	1200	226.676	226.673	0.0032	0.663481			2017-08-12 02:00:00	2400	21376	21647.3	-271.32	0.459877
2017-06-01 20:05:00	1205	226.869	226.868	0.00141	0.318907			2017-08-11 06:04:59	1205	226.676	226.673	0.00323	0.664469			2017-08-12 02:10:00	2410	22016	21647.3	368.687	0.559872
2017-06-01 20:10:00	1210	226.868	226.868	0.00042	0.286691			2017-08-11 06:09:59	1210	226.672	226.673	-0.00074	0.533619			2017-08-12 02:20:00	2420	21504	21647.3	-143.306	0.479878
2017-06-01 20:15:00	1215	226.868	226.868	0.00043	0.287016			2017-08-11 06:14:59	1215	226.675	226.673	0.00229	0.633487			2017-08-12 02:30:00	2430	21248	21647.3	-399.299	0.439881
2017-06-01 20:20:00	1220	226.866	226.868	-0.00156	0.222258			2017-08-11 06:19:59	1220	226.676	226.673	0.00332	0.667436			2017-08-12 02:40:00	2440	20480	21647.3	-1167.29	0.319889
2017-06-01 20:25:00	1225	226.866	226.868	-0.00155	0.222584			2017-08-11 06:24:59	1225	226.676	226.673	0.00335	0.668425			2017-08-12 02:50:00	2450	23040	21647.3	1392.72	0.719867
2017-06-01 20:30:00	1230	226.866	226.868	-0.00154	0.222909			2017-08-11 06:29:59	1230	226.674	226.673	0.00138	0.603494			2017-08-12 03:00:00	2460	21760	21647.3	112.722	0.51988
2017-06-01 20:35:00	1235	226.866	226.868	-0.00153	0.223235			2017-08-11 06:34:59	1235	226.672	226.673	-0.00059	0.538563			2017-08-12 03:10:00	2470	22016	21647.3	368.729	0.559878
2017-06-01 20:40:00	1240	226.866	226.868	-0.00152	0.22356			2017-08-11 06:39:59	1240	226.676	226.673	0.00344	0.671391			2017-08-12 03:20:00	2480	21376	21647.3	-271.264	0.459885
2017-06-01 20:45:00	1245	226.865	226.868	-0.00251	0.191344			2017-08-11 06:44:59	1245	226.672	226.673	-0.00053	0.540541			2017-08-12 03:30:00	2490	21120	21647.3	-527.257	0.419889
2017-06-01 20:50:00	1250	226.865	226.868	-0.0025	0.191669			2017-08-11 06:49:59	1250	226.674	226.673	0.0015	0.607449			2017-08-12 03:40:00	2500	21888	21647.2	240.75	0.539883
2017-06-01 20:55:00	1255	226.867	226.867	-0.00049	0.257078			2017-08-11 06:54:59	1255	226.673	226.672	0.00053	0.575478			2017-08-12 03:50:00	2510	22656	21647.2	1008.76	0.659877
2017-06-01 21:00:00	1260	226.867	226.867	-0.00048	0.257403			2017-08-11 06:59:59	1260	226.676	226.672	0.00356	0.675346			2017-08-12 04:00:00	2520	21248	21647.2	-399.236	0.439891
2017-06-01 21:05:00	1265	226.866	226.867	-0.00147	0.225187			2017-08-11 07:04:59	1265	226.674	226.672	0.00159	0.610415			2017-08-12 04:10:00	2530	21888	21647.2	240.771	0.539886
2017-06-01 21:10:00	1270	226.867	226.867	-0.00046	0.258054			2017-08-11 07:09:59	1270	226.673	226.672	0.00062	0.578444			2017-08-12 04:20:00	2540	22144	21647.2	496.778	0.579885
2017-06-01 21:15:00	1275	226.867	226.867	-0.00045	0.258379			2017-08-11 07:14:59	1275	226.675	226.672	0.00265	0.645353			2017-08-12 04:30:00	2550	22656	21647.2	1008.78	0.659881
2017-06-01 21:20:00	1280	226.866	226.867	-0.00144	0.226163			2017-08-11 07:19:59	1280	226.675	226.672	0.00268	0.646341			2017-08-12 04:40:00	2560	22528	21647.2	880.792	0.639884
2017-06-01 21:25:00	1285	226.863	226.867	-0.00443	0.128864			2017-08-11 07:24:59	1285	226.673	226.672	0.00071	0.581411			2017-08-12 04:50:00	2570	22400	21647.2	752.799	0.619886
2017-06-01 21:30:00	1290	226.865	226.867	-0.00242	0.194273			2017-08-11 07:29:59	1290	226.675	226.672	0.00274	0.648319			2017-08-12 05:00:00	2580	22016	21647.2	368.806	0.55989
2017-06-01 21:35:00	1295	226.868	226.867	0.00059	0.292223			2017-08-11 07:34:59	1295	226.676	226.672	0.00377	0.682268			2017-08-12 05:10:00	2590	22528	21647.2	880.813	0.639887
2017-06-01 21:40:00	1300	226.867	226.867	-0.0004	0.260007			2017-08-11 07:39:59	1300	226.672	226.672	-0.0002	0.551417			2017-08-12 05:20:00	2600	20736	21647.2	-911.18	0.359904
2017-06-01 21:45:00	1305	226.867	226.867	-0.00039	0.260332			2017-08-11 07:44:59	1305	226.674	226.672	0.00183	0.618326			2017-08-12 05:30:00	2610	21632	21647.2	-15.173	0.499897
2017-06-01 21:50:00	1310	226.868	226.867	0.00062	0.293199			2017-08-11 07:49:59	1310	226.673	226.672	0.00086	0.586355			2017-08-12 05:40:00	2620	21376	21647.2	-271.166	0.459901
2017-06-01 21:55:00	1315	226.868	226.867	0.00063	0.293524			2017-08-11 07:54:59	1315	226.672	226.672	-0.00011	0.554384			2017-08-12 05:50:00	2630	23168	21647.2	1520.84	0.739886
2017-06-01 22:00:00	1320	226.866	226.867	-0.00136	0.228767			2017-08-11 07:59:59	1320	226.671	226.672	-0.00108	0.522413			2017-08-12 06:00:00	2640	22528	21647.2	880.848	0.639892
2017-06-01 22:05:00	1325	226.867	226.867	-0.00035	0.261634			2017-08-11 08:04:59	1325	226.672	226.672	-5e-05	0.556361			2017-08-12 06:10:00	2650	21504	21647.1	-143.145	0.479903
2017-06-01 22:10:00	1330	226.865	226.867	-0.00234	0.196876			2017-08-11 08:09:59	1330	226.671	226.672	-0.00102	0.52439			2017-08-12 06:20:00	2660	22272	21647.1	624.862	0.599897
2017-06-01 22:15:00	1335	226.866	226.867	-0.00133	0.229743			2017-08-11 08:14:59	1335	226.671	226.672	-0.00099	0.525379			2017-08-12 06:30:00	2670	20992	21647.1	-655.131	0.39991
2017-06-01 22:20:00	1340	226.864	226.867	-0.00332	0.164985			2017-08-11 08:19:59	1340	226.671	226.672	-0.00096	0.526368			2017-08-12 06:40:00	2680	21632	21647.1	-15.124	0.499905
2017-06-01 22:25:00	1345	226.863	226.867	-0.00431	0.132769			2017-08-11 08:24:59	1345	226.671	226.672	-0.00093	0.527357			2017-08-12 06:50:00	2690	21504	21647.1	-143.117	0.479907
2017-06-01 22:30:00	1350	226.865	226.867	-0.0023	0.198178			2017-08-11 08:29:59	1350	226.671	226.672	-0.0009	0.528345			2017-08-12 07:00:00	2700	21888	21647.1	240.89	0.539905
2017-06-01 22:35:00	1355	226.867	226.867	-0.00029	0.263586			2017-08-11 08:34:59	1355	226.672	226.672	0.00013	0.562294			2017-08-12 07:10:00	2710	21888	21647.1	240.897	0.539906
2017-06-01 22:40:00	1360	226.865	226.867	-0.00228	0.198829			2017-08-11 08:39:59	1360	226.673	226.672	0.00116	0.596243			2017-08-12 07:20:00	2720	20992	21647.1	-655.096	0.399915
2017-06-01 22:45:00	1365	226.867	226.867	-0.00027	0.264237			2017-08-11 08:44:59	1365	226.67	226.672	-0.00181	0.498352			2017-08-12 07:30:00	2730	21376	21647.1	-271.089	0.459913
2017-06-01 22:50:00	1370	226.867	226.867	-0.00026	0.264562			2017-08-11 08:49:59	1370	226.67	226.672	-0.00178	0.499341			2017-08-12 07:40:00	2740	20864	21647.1	-783.082	0.379918
2017-06-01 22:55:00	1375	226.868	226.867	0.00075	0.297429			2017-08-11 08:54:59	1375	226.669	226.672	-0.00275	0.46737			2017-08-12 07:50:00	2750	20864	21647.1	-783.075	0.379919
2017-06-01 23:00:00	1380	226.863	226.867	-0.00424	0.135047			2017-08-11 08:59:59	1380	226.67	226.672	-0.00172	0.501318			2017-08-12 08:00:00	2760	21248	21647.1	-399.068	0.439917
2017-06-01 23:05:00	1385	226.865	226.867	-0.00223	0.200456			2017-08-11 09:04:59	1385	226.67	226.672	-0.00169	0.502307			2017-08-12 08:10:00	2770	21760	21647.1	112.939	0.519914
2017-06-01 23:10:00	1390	226.869	226.867	0.00178	0.330947			2017-08-11 09:09:59	1390	226.671	226.672	-0.00066	0.536256			2017-08-12 08:20:00	2780	20608	21647.1	-1039.05	0.339925
2017-06-01 23:15:00	1395	226.865	226.867	-0.00221	0.201106			2017-08-11 09:14:59	1395	226.671	226.672	-0.00063	0.537245			2017-08-12 08:30:00	2790	21376	21647	-271.047	0.459919
2017-06-01 23:20:00	1400	226.866	226.867	-0.0012	0.233973			2017-08-11 09:19:59	1400	226.672	226.672	0.0004	0.571193			2017-08-12 08:40:00	2800	22656	21647	1008.96	0.659909
2017-06-01 23:25:00	1405	226.868	226.867	0.00081	0.299382			2017-08-11 09:24:59	1405	226.67	226.672	-0.00157	0.506262			2017-08-12 08:50:00	2810	22272	21647	624.967	0.599913
2017-06-01 23:30:00	1410	226.866	226.867	-0.00118	0.234624			2017-08-11 09:29:59	1410	226.669	226.672	-0.00254	0.474291			2017-08-12 09:00:00	2820	21632	21647	-15.026	0.49992
2017-06-01 23:35:00	1415	226.866	226.867	-0.00117	0.23495			2017-08-11 09:34:59	1415	226.67	226.672	-0.00151	0.50824			2017-08-12 09:10:00	2830	20736	21647	-911.019	0.359929
2017-06-01 23:40:00	1420	226.865	226.867	-0.00216	0.202733			2017-08-11 09:39:59	1420	226.669	226.671	-0.00248	0.476269			2017-08-12 09:20:00	2840	21248	21647	-399.012	0.439926
2017-06-01 23:45:00	1425	226.867	226.867	-0.00015	0.268142			2017-08-11 09:44:59	1425	226.669	226.671	-0.00245	0.477258			2017-08-12 09:30:00	2850	22528	21647	880.995	0.639915
2017-06-01 23:50:00	1430	226.865	226.867	-0.00214	0.203384			2017-08-11 09:49:59	1430	226.668	226.671	-0.00342	0.445287			2017-08-12 09:40:00	2860	24064	21647	2417	0.879903
2017-06-01 23:55:00	1435	226.866	226.867	-0.00113	0.236251			2017-08-11 09:54:59	1435	226.67	226.671	-0.00139	0.512195			2017-08-12 09:50:00	2870	21120	21647	-526.991	0.41993
2017-06-02	1440	226.865	226.867	-0.00212	0.204035			2017-08-11 09:59:59	1440	226.669	226.671	-0.00236	0.480224			2017-08-12 10:00:00	2880	21376	21647	-270.984	0.459929
2017-06-02 00:05:00	1445	226.865	226.867	-0.00211	0.204361			2017-08-11 10:04:59	1445	226.671	226.671	-0.00033	0.547132			2017-08-12 10:10:00	2890	21760	21647	113.023	0.519927
2017-06-02 00:10:00	1450	226.866	226.867	-0.0011	0.237227			2017-08-11 10:09:59	1450	226.674	226.671	0.0027	0.647001			2017-08-12 10:20:00	2900	20480	21647	-1166.97	0.319939
2017-06-02 00:15:00	1455	226.867	226.867	-9e-05	0.270094			2017-08-11 10:14:59	1455	226.67	226.671	-0.00127	0.51615			2017-08-12 10:30:00	2910	19328	21647	-2318.96	0.139951
2017-06-02 00:20:00	1460	226.867	226.867	-8e-05	0.27042			2017-08-11 10:19:59	1460	226.668	226.671	-0.00324	0.45122			2017-08-12 10:40:00	2920	21248	21647	-398.956	0.439935
2017-06-02 00:25:00	1465	226.865	226.867	-0.00207	0.205662			2017-08-11 10:24:59	1465	226.668	226.671	-0.00321	0.452208			2017-08-12 10:50:00	2930	22016	21646.9	369.051	0.559929
2017-06-02 00:30:00	1470	226.866	226.867	-0.00106	0.238529			2017-08-11 10:29:59	1470	226.667	226.671	-0.00418	0.420237			2017-08-12 11:00:00	2940	21632	21646.9	-14.942	0.499933
2017-06-02 00:35:00	1475	226.863	226.867	-0.00405	0.14123			2017-08-11 10:34:59	1475	226.667	226.671	-0.00415	0.421226			2017-08-12 11:10:00	2950	21888	21646.9	241.065	0.539932
2017-06-02 00:40:00	1480	226.866	226.867	-0.00104	0.23918			2017-08-11 10:39:59	1480	226.667	226.671	-0.00412	0.422215			2017-08-12 11:20:00	2960	21376	21646.9	-270.928	0.459938
2017-06-02 00:45:00	1485	226.866	226.867	-0.00103	0.239505			2017-08-11 10:44:59	1485	226.67	226.671	-0.00109	0.522083			2017-08-12 11:30:00	2970	22528	21646.9	881.079	0.639928
2017-06-02 00:50:00	1490	226.868	226.867	0.00098	0.304914			2017-08-11 10:49:59	1490	226.67	226.671	-0.00106	0.523072			2017-08-12 11:40:00	2980	21888	21646.9	241.086	0.539935
2017-06-02 00:55:00	1495	226.868	226.867	0.00099	0.305239			2017-08-11 10:54:59	1495	226.669	226.671	-0.00203	0.491101			2017-08-12 11:50:00	2990	21504	21646.9	-142.907	0.47994
2017-06-02 01:00:00	1500	226.868	226.867	0.001	0.305565			2017-08-11 10:59:59	1500	226.668	226.671	-0.003	0.45913			2017-08-12 12:00:00	3000	21120	21646.9	-526.9	0.419944
2017-06-02 01:05:00	1505	226.867	226.867	1e-05	0.273349			2017-08-11 11:04:59	1505	226.669	226.671	-0.00197	0.493078			2017-08-12 12:10:00	3010	21120	21646.9	-526.893	0.419946
2017-06-02 01:10:00	1510	226.866	226.867	-0.00098	0.241132			2017-08-11 11:09:59	1510	226.668	226.671	-0.00294	0.461107			2017-08-12 12:20:00	3020	22016	21646.9	369.114	0.559939
2017-06-02 01:15:00	1515	226.867	226.867	3e-05	0.273999			2017-08-11 11:14:59	1515	226.671	226.671	9e-05	0.560976			2017-08-12 12:30:00	3030	21760	21646.9	113.121	0.519942
2017-06-02 01:20:00	1520	226.867	226.867	4e-05	0.274325			2017-08-11 11:19:59	1520	226.669	226.671	-0.00188	0.496045			2017-08-12 12:40:00	3040	22272	21646.9	625.128	0.599938
2017-06-02 01:25:00	1525	226.869	226.867	0.00205	0.339733			2017-08-11 11:24:59	1525	226.668	226.671	-0.00285	0.464074			2017-08-12 12:50:00	3050	19328	21646.9	-2318.87	0.139966
2017-06-02 01:30:00	1530	226.866	226.867	-0.00094	0.242434			2017-08-11 11:29:59	1530	226.67	226.671	-0.00082	0.530982			2017-08-12 13:00:00	3060	20992	21646.9	-654.858	0.399952
2017-06-02 01:35:00	1535	226.866	226.867	-0.00093	0.24276			2017-08-11 11:34:59	1535	226.669	226.671	-0.00179	0.499011			2017-08-12 13:10:00	3070	22016	21646.9	369.149	0.559944
2017-06-02 01:40:00	1540	226.869	226.867	0.00208	0.340709			2017-08-11 11:39:59	1540	226.67	226.671	-0.00076	0.53296			2017-08-12 13:20:00	3080	20352	21646.8	-1294.84	0.29996
2017-06-02 01:45:00	1545	226.869	226.867	0.00209	0.341035			2017-08-11 11:44:59	1545	226.667	226.671	-0.00373	0.435069			2017-08-12 13:30:00	3090	21120	21646.8	-526.837	0.419954
2017-06-02 01:50:00	1550	226.867	226.867	0.0001	0.276277			2017-08-11 11:49:59	1550	226.667	226.671	-0.0037	0.436058			2017-08-12 13:40:00	3100	22400	21646.8	753.17	0.619944
2017-06-02 01:55:00	1555	226.868	226.867	0.00111	0.309144			2017-08-11 11:54:59	1555	226.67	226.671	-0.00067	0.535926			2017-08-12 13:50:00	3110	22528	21646.8	881.177	0.639944
2017-06-02 02:00:00	1560	226.866	226.867	-0.00088	0.244387			2017-08-11 11:59:59	1560	226.666	226.671	-0.00464	0.405076			2017-08-12 14:00:00	3120	21760	21646.8	113.184	0.519952
2017-06-02 02:05:00	1565	226.866	226.867	-0.00087	0.244712			2017-08-11 12:04:59	1565	226.667	226.671	-0.00361	0.439024			2017-08-12 14:10:00	3130	20096	21646.8	-1550.81	0.259968
2017-06-02 02:10:00	1570	226.868	226.867	0.00114	0.31012			2017-08-11 12:09:59	1570	226.668	226.671	-0.00258	0.472973			2017-08-12 14:20:00	3140	22784	21646.8	1137.2	0.679945
2017-06-02 02:15:00	1575	226.866	226.867	-0.00085	0.245363			2017-08-11 12:14:59	1575	226.67	226.671	-0.00055	0.539881			2017-08-12 14:30:00	3150	21504	21646.8	-142.795	0.479957
2017-06-02 02:20:00	1580	226.867	226.867	0.00016	0.27823			2017-08-11 12:19:59	1580	226.666	226.671	-0.00452	0.409031			2017-08-12 14:40:00	3160	21888	21646.8	241.212	0.539955
2017-06-02 02:25:00	1585	226.869	226.867	0.00217	0.343638			2017-08-11 12:24:59	1585	226.667	226.67	-0.00349	0.44298			2017-08-12 14:50:00	3170	21888	21646.8	241.219	0.539956
2017-06-02 02:30:00	1590	226.866	226.867	-0.00082	0.246339			2017-08-11 12:29:59	1590	226.668	226.67	-0.00246	0.476928			2017-08-12 15:00:00	3180	21504	21646.8	-142.774	0.479961
2017-06-02 02:35:00	1595	226.866	226.867	-0.00081	0.246664			2017-08-11 12:34:59	1595	226.666	226.67	-0.00443	0.411997			2017-08-12 15:10:00	3190	21120	21646.8	-526.767	0.419965
2017-06-02 02:40:00	1600	226.865	226.867	-0.0018	0.214448			2017-08-11 12:39:59	1600	226.667	226.67	-0.0034	0.445946			2017-08-12 15:20:00	3200	20736	21646.8	-910.76	0.35997
2017-06-02 02:45:00	1605	226.866	226.867	-0.00079	0.247315			2017-08-11 12:44:59	1605	226.666	226.67	-0.00437	0.413975			2017-08-12 15:30:00	3210	21504	21646.8	-142.753	0.479964
2017-06-02 02:50:00	1610	226.868	226.867	0.00122	0.312724			2017-08-11 12:49:59	1610	226.668	226.67	-0.00234	0.480883			2017-08-12 15:40:00	3220	20736	21646.7	-910.746	0.359972
2017-06-02 02:55:00	1615	226.864	226.867	-0.00277	0.182883			2017-08-11 12:54:59	1615	226.667	226.67	-0.00331	0.448912			2017-08-12 15:50:00	3230	21888	21646.7	241.261	0.539963
2017-06-02 03:00:00	1620	226.869	226.867	0.00224	0.345916			2017-08-11 12:59:59	1620	226.666	226.67	-0.00428	0.416941			2017-08-12 16:00:00	3240	22272	21646.7	625.268	0.59996
2017-06-02 03:05:00	1625	226.867	226.867	0.00025	0.281158			2017-08-11 13:04:59	1625	226.667	226.67	-0.00325	0.45089			2017-08-12 16:10:00	3250	21248	21646.7	-398.725	0.439971
2017-06-02 03:10:00	1630	226.868	226.867	0.00126	0.314025			2017-08-11 13:09:59	1630	226.668	226.67	-0.00222	0.484838			2017-08-12 16:20:00	3260	20864	21646.7	-782.718	0.379975
2017-06-02 03:15:00	1635	226.864	226.867	-0.00273	0.184185			2017-08-11 13:14:59	1635	226.668	226.67	-0.00219	0.485827			2017-08-12 16:30:00	3270	20736	21646.7	-910.711	0.359977
2017-06-02 03:20:00	1640	226.866	226.867	-0.00072	0.249593			2017-08-11 13:19:59	1640	226.667	226.67	-0.00316	0.453856			2017-08-12 16:40:00	3280	21888	21646.7	241.296	0.539968
2017-06-02 03:25:00	1645	226.866	226.867	-0.00071	0.249919			2017-08-11 13:24:59	1645	226.667	226.67	-0.00313	0.454845			2017-08-12 16:50:00	3290	18432	21646.7	-3214.7	4.68723e-07
2017-06-02 03:30:00	1650	226.866	226.867	-0.0007	0.250244			2017-08-11 13:29:59	1650	226.667	226.67	-0.0031	0.455834			2017-08-12 17:00:00	3300	19968	21646.7	-1678.69	0.239988
2017-06-02 03:35:00	1655	226.866	226.867	-0.00069	0.250569			2017-08-11 13:34:59	1655	226.667	226.67	-0.00307	0.456823			2017-08-12 17:10:00	3310	20096	21646.7	-1550.68	0.259988
2017-06-02 03:40:00	1660	226.863	226.867	-0.00368	0.15327			2017-08-11 13:39:59	1660	226.667	226.67	-0.00304	0.457811			2017-08-12 17:20:00	3320	21248	21646.7	-398.676	0.439978
2017-06-02 03:45:00	1665	226.867	226.867	0.00033	0.283762			2017-08-11 13:44:59	1665	226.669	226.67	-0.00101	0.52472			2017-08-12 17:30:00	3330	20736	21646.7	-910.669	0.359984
2017-06-02 03:50:00	1670	226.867	226.867	0.00034	0.284087			2017-08-11 13:49:59	1670	226.667	226.67	-0.00298	0.459789			2017-08-12 17:40:00	3340	21504	21646.7	-142.662	0.479978
2017-06-02 03:55:00	1675	226.867	226.867	0.00035	0.284413			2017-08-11 13:54:59	1675	226.668	226.67	-0.00195	0.493738			2017-08-12 17:50:00	3350	20608	21646.7	-1038.65	0.339987
2017-06-02 04:00:00	1680	226.868	226.867	0.00136	0.31728			2017-08-11 13:59:59	1680	226.664	226.67	-0.00592	0.362887			2017-08-12 18:00:00	3360	21760	21646.6	113.352	0.519978
2017-06-02 04:05:00	1685	226.866	226.867	-0.00063	0.252522			2017-08-11 14:04:59	1685	226.668	226.67	-0.00189	0.495715			2017-08-12 18:10:00	3370	21632	21646.6	-14.641	0.49998
2017-06-02 04:10:00	1690	226.867	226.867	0.00038	0.285389			2017-08-11 14:09:59	1690	226.667	226.67	-0.00286	0.463744			2017-08-12 18:20:00	3380	21248	21646.6	-398.634	0.439985
2017-06-02 04:15:00	1695	226.866	226.867	-0.00061	0.253173			2017-08-11 14:14:59	1695	226.667	226.67	-0.00283	0.464733			2017-08-12 18:30:00	3390	21120	21646.6	-526.627	0.419987
2017-06-02 04:20:00	1700	226.868	226.867	0.0014	0.318581			2017-08-11 14:19:59	1700	226.667	226.67	-0.0028	0.465722			2017-08-12 18:40:00	3400	21376	21646.6	-270.62	0.459986
2017-06-02 04:25:00	1705	226.869	226.867	0.00241	0.351448			2017-08-11 14:24:59	1705	226.669	226.67	-0.00077	0.53263			2017-08-12 18:50:00	3410	22656	21646.6	1009.39	0.659975
2017-06-02 04:30:00	1710	226.869	226.867	0.00242	0.351774			2017-08-11 14:29:59	1710	226.665	226.67	-0.00474	0.40178			2017-08-12 19:00:00	3420	20864	21646.6	-782.606	0.379993
2017-06-02 04:35:00	1715	226.868	226.867	0.00143	0.319557			2017-08-11 14:34:59	1715	226.666	226.67	-0.00371	0.435728			2017-08-12 19:10:00	3430	21376	21646.6	-270.599	0.459989
2017-06-02 04:40:00	1720	226.868	226.867	0.00144	0.319883			2017-08-11 14:39:59	1720	226.665	226.67	-0.00468	0.403757			2017-08-12 19:20:00	3440	21248	21646.6	-398.592	0.439991
2017-06-02 04:45:00	1725	226.866	226.867	-0.00055	0.255125			2017-08-11 14:44:59	1725	226.663	226.67	-0.00665	0.338827			2017-08-12 19:30:00	3450	22016	21646.6	369.415	0.559986
2017-06-02 04:50:00	1730	226.866	226.867	-0.00054	0.255451			2017-08-11 14:49:59	1730	226.665	226.67	-0.00462	0.405735			2017-08-12 19:40:00	3460	22016	21646.6	369.422	0.559987
2017-06-02 04:55:00	1735	226.865	226.867	-0.00153	0.223235			2017-08-11 14:54:59	1735	226.666	226.67	-0.00359	0.439684			2017-08-12 19:50:00	3470	22144	21646.6	497.429	0.579987
2017-06-02 05:00:00	1740	226.867	226.867	0.00048	0.288643			2017-08-11 14:59:59	1740	226.664	226.67	-0.00556	0.374753			2017-08-12 20:00:00	3480	22656	21646.6	1009.44	0.659983
2017-06-02 05:05:00	1745	226.864	226.867	-0.00251	0.191344			2017-08-11 15:04:59	1745	226.665	226.67	-0.00453	0.408701			2017-08-12 20:10:00	3490	21376	21646.6	-270.557	0.459996
2017-06-02 05:10:00	1750	226.863	226.867	-0.0035	0.159128			2017-08-11 15:09:59	1750	226.668	226.669	-0.0015	0.50857			2017-08-12 20:20:00	3500	22656	21646.5	1009.45	0.659985
2017-06-02 05:15:00	1755	226.867	226.866	0.00051	0.289619			2017-08-11 15:14:59	1755	226.664	226.669	-0.00547	0.377719			2017-08-12 20:30:00	3510	23296	21646.5	1649.46	0.759981
2017-06-02 05:20:00	1760	226.865	226.866	-0.00148	0.224862			2017-08-11 15:19:59	1760	226.666	226.669	-0.00344	0.444628			2017-08-12 20:40:00	3520	21632	21646.5	-14.536	0.499997
2017-06-02 05:25:00	1765	226.864	226.866	-0.00247	0.192646			2017-08-11 15:24:59	1765	226.666	226.669	-0.00341	0.445616			2017-08-12 20:50:00	3530	21120	21646.5	-526.529	0.420002
2017-06-02 05:30:00	1770	226.866	226.866	-0.00046	0.258054			2017-08-11 15:29:59	1770	226.668	226.669	-0.00138	0.512525			2017-08-12 21:00:00	3540	22656	21646.5	1009.48	0.65999
2017-06-02 05:35:00	1775	226.867	226.866	0.00055	0.290921			2017-08-11 15:34:59	1775	226.666	226.669	-0.00335	0.447594			2017-08-12 21:10:00	3550	21248	21646.5	-398.515	0.440003
2017-06-02 05:40:00	1780	226.865	226.866	-0.00144	0.226163			2017-08-11 15:39:59	1780	226.667	226.669	-0.00232	0.481543			2017-08-12 21:20:00	3560	22912	21646.5	1265.49	0.69999
2017-06-02 05:45:00	1785	226.866	226.866	-0.00043	0.25903			2017-08-11 15:44:59	1785	226.665	226.669	-0.00429	0.416612			2017-08-12 21:30:00	3570	21376	21646.5	-270.501	0.460004
2017-06-02 05:50:00	1790	226.866	226.866	-0.00042	0.259356			2017-08-11 15:49:59	1790	226.664	226.669	-0.00526	0.384641			2017-08-12 21:40:00	3580	21632	21646.5	-14.494	0.500003
2017-06-02 05:55:00	1795	226.865	226.866	-0.00141	0.22714			2017-08-11 15:54:59	1795	226.666	226.669	-0.00323	0.451549			2017-08-12 21:50:00	3590	21120	21646.5	-526.487	0.420009
2017-06-02 06:00:00	1800	226.866	226.866	-0.0004	0.260007			2017-08-11 15:59:59	1800	226.666	226.669	-0.0032	0.452538			2017-08-12 22:00:00	3600	22272	21646.5	625.52	0.6
2017-06-02 06:05:00	1805	226.863	226.866	-0.00339	0.162707			2017-08-11 16:04:59	1805	226.667	226.669	-0.00217	0.486486			2017-08-12 22:10:00	3610	22400	21646.5	753.527	0.62
2017-06-02 06:10:00	1810	226.866	226.866	-0.00038	0.260657			2017-08-11 16:09:59	1810	226.668	226.669	-0.00114	0.520435			2017-08-12 22:20:00	3620	22656	21646.5	1009.53	0.659998
2017-06-02 06:15:00	1815	226.865	226.866	-0.00137	0.228441			2017-08-11 16:14:59	1815	226.663	226.669	-0.00611	0.356625			2017-08-12 22:30:00	3630	21760	21646.5	113.541	0.520008
2017-06-02 06:20:00	1820	226.866	226.866	-0.00036	0.261308			2017-08-11 16:19:59	1820	226.667	226.669	-0.00208	0.489453			2017-08-12 22:40:00	3640	22272	21646.5	625.548	0.600004
2017-06-02 06:25:00	1825	226.865	226.866	-0.00135	0.229092			2017-08-11 16:24:59	1825	226.666	226.669	-0.00305	0.457482			2017-08-12 22:50:00	3650	23552	21646.4	1905.56	0.799994
2017-06-02 06:30:00	1830	226.865	226.866	-0.00134	0.229418			2017-08-11 16:29:59	1830	226.664	226.669	-0.00502	0.392551			2017-08-12 23:00:00	3660	21120	21646.4	-526.438	0.420017
2017-06-02 06:35:00	1835	226.865	226.866	-0.00133	0.229743			2017-08-11 16:34:59	1835	226.667	226.669	-0.00199	0.492419			2017-08-12 23:10:00	3670	23168	21646.4	1521.57	0.739999
2017-06-02 06:40:00	1840	226.863	226.866	-0.00332	0.164985			2017-08-11 16:39:59	1840	226.667	226.669	-0.00196	0.493408			2017-08-12 23:20:00	3680	22400	21646.4	753.576	0.620007
2017-06-02 06:45:00	1845	226.864	226.866	-0.00231	0.197852			2017-08-11 16:44:59	1845	226.668	226.669	-0.00093	0.527357			2017-08-12 23:30:00	3690	21632	21646.4	-14.417	0.500015
2017-06-02 06:50:00	1850	226.866	226.866	-0.0003	0.263261			2017-08-11 16:49:59	1850	226.666	226.669	-0.0029	0.462426			2017-08-12 23:40:00	3700	22144	21646.4	497.59	0.580012
2017-06-02 06:55:00	1855	226.866	226.866	-0.00029	0.263586			2017-08-11 16:54:59	1855	226.666	226.669	-0.00287	0.463415			2017-08-12 23:50:00	3710	21888	21646.4	241.597	0.540015
2017-06-02 07:00:00	1860	226.866	226.866	-0.00028	0.263911			2017-08-11 16:59:59	1860	226.667	226.669	-0.00184	0.497363			2017-08-13	3720	22272	21646.4	625.604	0.600013
2017-06-02 07:05:00	1865	226.862	226.866	-0.00427	0.134071			2017-08-11 17:04:59	1865	226.666	226.669	-0.00281	0.465392			2017-08-13 00:10:00	3730	23040	21646.4	1393.61	0.720007
2017-06-02 07:10:00	1870	226.865	226.866	-0.00126	0.232021			2017-08-11 17:09:59	1870	226.668	226.669	-0.00078	0.532301			2017-08-13 00:20:00	3740	22016	21646.4	369.618	0.560017
2017-06-02 07:15:00	1875	226.861	226.866	-0.00525	0.10218			2017-08-11 17:14:59	1875	226.665	226.669	-0.00375	0.43441			2017-08-13 00:30:00	3750	20480	21646.4	-1166.38	0.320032
2017-06-02 07:20:00	1880	226.864	226.866	-0.00224	0.20013			2017-08-11 17:19:59	1880	226.666	226.669	-0.00272	0.468359			2017-08-13 00:40:00	3760	21760	21646.4	113.632	0.520022
2017-06-02 07:25:00	1885	226.862	226.866	-0.00423	0.135373			2017-08-11 17:24:59	1885	226.666	226.669	-0.00269	0.469347			2017-08-13 00:50:00	3770	21504	21646.4	-142.361	0.480025
2017-06-02 07:30:00	1890	226.866	226.866	-0.00022	0.265864			2017-08-11 17:29:59	1890	226.664	226.669	-0.00466	0.404417			2017-08-13 01:00:00	3780	21120	21646.4	-526.354	0.42003
2017-06-02 07:35:00	1895	226.865	226.866	-0.00121	0.233648			2017-08-11 17:34:59	1895	226.666	226.669	-0.00263	0.471325			2017-08-13 01:10:00	3790	22912	21646.3	1265.65	0.700015
2017-06-02 07:40:00	1900	226.865	226.866	-0.0012	0.233973			2017-08-11 17:39:59	1900	226.665	226.669	-0.0036	0.439354			2017-08-13 01:20:00	3800	21760	21646.3	113.66	0.520026
2017-06-02 07:45:00	1905	226.865	226.866	-0.00119	0.234299			2017-08-11 17:44:59	1905	226.667	226.669	-0.00157	0.506262			2017-08-13 01:30:00	3810	24832	21646.3	3185.67	1
2017-06-02 07:50:00	1910	226.868	226.866	0.00182	0.332249			2017-08-11 17:49:59	1910	226.664	226.669	-0.00454	0.408372			2017-08-13 01:40:00	3820	22144	21646.3	497.674	0.580025
2017-06-02 07:55:00	1915	226.866	226.866	-0.00017	0.267491			2017-08-11 17:54:59	1915	226.666	226.669	-0.00251	0.47528			2017-08-13 01:50:00	3830	20224	21646.3	-1422.32	0.280043
2017-06-02 08:00:00	1920	226.861	226.866	-0.00516	0.105109			2017-08-11 17:59:59	1920	226.665	226.668	-0.00348	0.443309			2017-08-13 02:00:00	3840	22016	21646.3	369.688	0.560028
2017-06-02 08:05:00	1925	226.864	226.866	-0.00215	0.203059			2017-08-11 18:04:59	1925	226.666	226.668	-0.00245	0.477258			2017-08-13 02:10:00	3850	20352	21646.3	-1294.31	0.300044
2017-06-02 08:10:00	1930	226.865	226.866	-0.00114	0.235926			2017-08-11 18:09:59	1930	226.662	226.668	-0.00642	0.346407			2017-08-13 02:20:00	3860	22400	21646.3	753.702	0.620027
2017-06-02 08:15:00	1935	226.865	226.866	-0.00113	0.236251			2017-08-11 18:14:59	1935	226.664	226.668	-0.00439	0.413316			2017-08-13 02:30:00	3870	21376	21646.3	-270.291	0.460037
2017-06-02 08:20:00	1940	226.867	226.866	0.00088	0.30166			2017-08-11 18:19:59	1940	226.663	226.668	-0.00536	0.381345			2017-08-13 02:40:00	3880	21888	21646.3	241.716	0.540034
2017-06-02 08:25:00	1945	226.867	226.866	0.00089	0.301985			2017-08-11 18:24:59	1945	226.663	226.668	-0.00533	0.382334			2017-08-13 02:50:00	3890	21376	21646.3	-270.277	0.460039
2017-06-02 08:30:00	1950	226.864	226.866	-0.0021	0.204686			2017-08-11 18:29:59	1950	226.665	226.668	-0.0033	0.449242			2017-08-13 03:00:00	3900	21632	21646.3	-14.27	0.500038
2017-06-02 08:35:00	1955	226.866	226.866	-9e-05	0.270094			2017-08-11 18:34:59	1955	226.665	226.668	-0.00327	0.450231			2017-08-13 03:10:00	3910	23296	21646.3	1649.74	0.760024
2017-06-02 08:40:00	1960	226.866	226.866	-8e-05	0.27042			2017-08-11 18:39:59	1960	226.665	226.668	-0.00324	0.45122			2017-08-13 03:20:00	3920	22016	21646.3	369.744	0.560037
2017-06-02 08:45:00	1965	226.864	226.866	-0.00207	0.205662			2017-08-11 18:44:59	1965	226.666	226.668	-0.00221	0.485168			2017-08-13 03:30:00	3930	20992	21646.2	-654.249	0.400047
2017-06-02 08:50:00	1970	226.866	226.866	-6e-05	0.271071			2017-08-11 18:49:59	1970	226.667	226.668	-0.00118	0.519117			2017-08-13 03:40:00	3940	23168	21646.2	1521.76	0.740029
2017-06-02 08:55:00	1975	226.86	226.866	-0.00605	0.0761471			2017-08-11 18:54:59	1975	226.664	226.668	-0.00415	0.421226			2017-08-13 03:50:00	3950	22016	21646.2	369.765	0.56004
2017-06-02 09:00:00	1980	226.864	226.866	-0.00204	0.206638			2017-08-11 18:59:59	1980	226.665	226.668	-0.00312	0.455175			2017-08-13 04:00:00	3960	20864	21646.2	-782.228	0.380052
2017-06-02 09:05:00	1985	226.867	226.866	0.00097	0.304588			2017-08-11 19:04:59	1985	226.662	226.668	-0.00609	0.357284			2017-08-13 04:10:00	3970	21760	21646.2	113.779	0.520045
2017-06-02 09:10:00	1990	226.864	226.866	-0.00202	0.207289			2017-08-11 19:09:59	1990	226.665	226.668	-0.00306	0.457152			2017-08-13 04:20:00	3980	21248	21646.2	-398.214	0.44005
2017-06-02 09:15:00	1995	226.864	226.866	-0.00201	0.207615			2017-08-11 19:14:59	1995	226.664	226.668	-0.00403	0.425181			2017-08-13 04:30:00	3990	20480	21646.2	-1166.21	0.320059
2017-06-02 09:20:00	2000	226.867	226.866	0.001	0.305565			2017-08-11 19:19:59	2000	226.662	226.668	-0.006	0.36025			2017-08-13 04:40:00	4000	21632	21646.2	-14.2	0.500049
2017-06-02 09:25:00	2005	226.863	226.866	-0.00299	0.175724			2017-08-11 19:24:59	2005	226.665	226.668	-0.00297	0.460119			2017-08-13 04:50:00	4010	22912	21646.2	1265.81	0.700039
2017-06-02 09:30:00	2010	226.866	226.866	2e-05	0.273674			2017-08-11 19:29:59	2010	226.664	226.668	-0.00394	0.428148			2017-08-13 05:00:00	4020	21376	21646.2	-270.186	0.460054
2017-06-02 09:35:00	2015	226.864	226.866	-0.00197	0.208916			2017-08-11 19:34:59	2015	226.664	226.668	-0.00391	0.429136			2017-08-13 05:10:00	4030	21376	21646.2	-270.179	0.460055
2017-06-02 09:40:00	2020	226.866	226.866	4e-05	0.274325			2017-08-11 19:39:59	2020	226.662	226.668	-0.00588	0.364206			2017-08-13 05:20:00	4040	20480	21646.2	-1166.17	0.320064
2017-06-02 09:45:00	2025	226.866	226.866	5e-05	0.27465			2017-08-11 19:44:59	2025	226.662	226.668	-0.00585	0.365194			2017-08-13 05:30:00	4050	22272	21646.2	625.835	0.600049
2017-06-02 09:50:00	2030	226.866	226.866	6e-05	0.274976			2017-08-11 19:49:59	2030	226.664	226.668	-0.00382	0.432103			2017-08-13 05:40:00	4060	21888	21646.2	241.842	0.540053
2017-06-02 09:55:00	2035	226.865	226.866	-0.00093	0.24276			2017-08-11 19:54:59	2035	226.663	226.668	-0.00479	0.400132			2017-08-13 05:50:00	4070	23168	21646.2	1521.85	0.740043
2017-06-02 10:00:00	2040	226.867	226.866	0.00108	0.308168			2017-08-11 19:59:59	2040	226.662	226.668	-0.00576	0.368161			2017-08-13 06:00:00	4080	20992	21646.1	-654.144	0.400064
2017-06-02 10:05:00	2045	226.867	226.866	0.00109	0.308493			2017-08-11 20:04:59	2045	226.663	226.668	-0.00473	0.402109			2017-08-13 06:10:00	4090	20864	21646.1	-782.137	0.380066
2017-06-02 10:10:00	2050	226.862	226.866	-0.0039	0.146111			2017-08-11 20:09:59	2050	226.663	226.668	-0.0047	0.403098			2017-08-13 06:20:00	4100	22656	21646.1	1009.87	0.660051
2017-06-02 10:15:00	2055	226.866	226.866	0.00011	0.276603			2017-08-11 20:14:59	2055	226.664	226.668	-0.00367	0.437047			2017-08-13 06:30:00	4110	22272	21646.1	625.877	0.600055
2017-06-02 10:20:00	2060	226.866	226.866	0.00012	0.276928			2017-08-11 20:19:59	2060	226.661	226.668	-0.00664	0.339156			2017-08-13 06:40:00	4120	21760	21646.1	113.884	0.520061
2017-06-02 10:25:00	2065	226.865	226.866	-0.00087	0.244712			2017-08-11 20:24:59	2065	226.663	226.668	-0.00461	0.406065			2017-08-13 06:50:00	4130	22272	21646.1	625.891	0.600058
2017-06-02 10:30:00	2070	226.866	226.866	0.00014	0.277579			2017-08-11 20:29:59	2070	226.66	226.668	-0.00758	0.308174			2017-08-13 07:00:00	4140	20224	21646.1	-1422.1	0.280077
2017-06-02 10:35:00	2075	226.867	226.866	0.00115	0.310446			2017-08-11 20:34:59	2075	226.662	226.668	-0.00555	0.375082			2017-08-13 07:10:00	4150	21504	21646.1	-142.095	0.480067
2017-06-02 10:40:00	2080	226.864	226.866	-0.00184	0.213147			2017-08-11 20:39:59	2080	226.66	226.668	-0.00752	0.310152			2017-08-13 07:20:00	4160	22144	21646.1	497.912	0.580062
2017-06-02 10:45:00	2085	226.865	226.866	-0.00083	0.246014			2017-08-11 20:44:59	2085	226.662	226.667	-0.00549	0.37706			2017-08-13 07:30:00	4170	22272	21646.1	625.919	0.600062
2017-06-02 10:50:00	2090	226.867	226.866	0.00118	0.311422			2017-08-11 20:49:59	2090	226.665	226.667	-0.00246	0.476928			2017-08-13 07:40:00	4180	21888	21646.1	241.926	0.540067
2017-06-02 10:55:00	2095	226.868	226.866	0.00219	0.344289			2017-08-11 20:54:59	2095	226.66	226.667	-0.00743	0.313118			2017-08-13 07:50:00	4190	22272	21646.1	625.933	0.600064
2017-06-02 11:00:00	2100	226.866	226.866	0.0002	0.279531			2017-08-11 20:59:59	2100	226.661	226.667	-0.0064	0.347067			2017-08-13 08:00:00	4200	20608	21646.1	-1038.06	0.34008
2017-06-02 11:05:00	2105	226.867	226.866	0.00121	0.312398			2017-08-11 21:04:59	2105	226.662	226.667	-0.00537	0.381015			2017-08-13 08:10:00	4210	21888	21646.1	241.947	0.54007
2017-06-02 11:10:00	2110	226.866	226.866	0.00022	0.280182			2017-08-11 21:09:59	2110	226.662	226.667	-0.00534	0.382004			2017-08-13 08:20:00	4220	21248	21646	-398.046	0.440077
2017-06-02 11:15:00	2115	226.866	226.866	0.00023	0.280508			2017-08-11 21:14:59	2115	226.663	226.667	-0.00431	0.415953			2017-08-13 08:30:00	4230	21888	21646	241.961	0.540072
2017-06-02 11:20:00	2120	226.867	226.866	0.00124	0.313375			2017-08-11 21:19:59	2120	226.662	226.667	-0.00528	0.383982			2017-08-13 08:40:00	4240	21248	21646	-398.032	0.440079
2017-06-02 11:25:00	2125	226.867	226.866	0.00125	0.3137			2017-08-11 21:24:59	2125	226.662	226.667	-0.00525	0.38497			2017-08-13 08:50:00	4250	20864	21646	-782.025	0.380083
2017-06-02 11:30:00	2130	226.866	226.866	0.00026	0.281484			2017-08-11 21:29:59	2130	226.663	226.667	-0.00422	0.418919			2017-08-13 09:00:00	4260	21888	21646	241.982	0.540075
2017-06-02 11:35:00	2135	226.868	226.866	0.00227	0.346892			2017-08-11 21:34:59	2135	226.662	226.667	-0.00519	0.386948			2017-08-13 09:10:00	4270	21376	21646	-270.011	0.460081
2017-06-02 11:40:00	2140	226.868	226.866	0.00228	0.347218			2017-08-11 21:39:59	2140	226.664	226.667	-0.00316	0.453856			2017-08-13 09:20:00	4280	20736	21646	-910.004	0.360088
2017-06-02 11:45:00	2145	226.867	226.866	0.00129	0.315002			2017-08-11 21:44:59	2145	226.659	226.667	-0.00813	0.290046			2017-08-13 09:30:00	4290	22528	21646	882.003	0.640073
2017-06-02 11:50:00	2150	226.866	226.866	0.0003	0.282786			2017-08-11 21:49:59	2150	226.665	226.667	-0.0021	0.488794			2017-08-13 09:40:00	4300	22272	21646	626.01	0.600076
2017-06-02 11:55:00	2155	226.867	226.866	0.00131	0.315652			2017-08-11 21:54:59	2155	226.663	226.667	-0.00407	0.423863			2017-08-13 09:50:00	4310	22016	21646	370.017	0.56008
2017-06-02 12:00:00	2160	226.866	226.866	0.00032	0.283436			2017-08-11 21:59:59	2160	226.663	226.667	-0.00404	0.424852			2017-08-13 10:00:00	4320	22528	21646	882.024	0.640076
2017-06-02 12:05:00	2165	226.867	226.866	0.00133	0.316303			2017-08-11 22:04:59	2165	226.662	226.667	-0.00501	0.392881			2017-08-13 10:10:00	4330	23168	21646	1522.03	0.740071
2017-06-02 12:10:00	2170	226.866	226.866	0.00034	0.284087			2017-08-11 22:09:59	2170	226.662	226.667	-0.00498	0.393869			2017-08-13 10:20:00	4340	20608	21646	-1037.96	0.340096
2017-06-02 12:15:00	2175	226.868	226.866	0.00235	0.349496			2017-08-11 22:14:59	2175	226.658	226.667	-0.00895	0.263019			2017-08-13 10:30:00	4350	20096	21646	-1549.96	0.260101
2017-06-02 12:20:00	2180	226.866	226.866	0.00036	0.284738			2017-08-11 22:19:59	2180	226.661	226.667	-0.00592	0.362887			2017-08-13 10:40:00	4360	21632	21645.9	-13.948	0.500089
2017-06-02 12:25:00	2185	226.869	226.866	0.00337	0.382688			2017-08-11 22:24:59	2185	226.659	226.667	-0.00789	0.297956			2017-08-13 10:50:00	4370	22016	21645.9	370.059	0.560086
2017-06-02 12:30:00	2190	226.869	226.866	0.00338	0.383013			2017-08-11 22:29:59	2190	226.662	226.667	-0.00486	0.397825			2017-08-13 11:00:00	4380	20096	21645.9	-1549.93	0.260105
2017-06-02 12:35:00	2195	226.866	226.866	0.00039	0.285714			2017-08-11 22:34:59	2195	226.659	226.667	-0.00783	0.299934			2017-08-13 11:10:00	4390	21760	21645.9	114.073	0.520091
2017-06-02 12:40:00	2200	226.867	226.866	0.0014	0.318581			2017-08-11 22:39:59	2200	226.662	226.667	-0.0048	0.399802			2017-08-13 11:20:00	4400	21760	21645.9	114.08	0.520092
2017-06-02 12:45:00	2205	226.867	226.866	0.00141	0.318907			2017-08-11 22:44:59	2205	226.658	226.667	-0.00877	0.268952			2017-08-13 11:30:00	4410	22016	21645.9	370.087	0.560091
2017-06-02 12:50:00	2210	226.868	226.866	0.00242	0.351774			2017-08-11 22:49:59	2210	226.658	226.667	-0.00874	0.269941			2017-08-13 11:40:00	4420	20864	21645.9	-781.906	0.380102
2017-06-02 12:55:00	2215	226.87	226.866	0.00443	0.417182			2017-08-11 22:54:59	2215	226.658	226.667	-0.00871	0.270929			2017-08-13 11:50:00	4430	22016	21645.9	370.101	0.560093
2017-06-02 13:00:00	2220	226.867	226.866	0.00144	0.319883			2017-08-11 22:59:59	2220	226.657	226.667	-0.00968	0.238958			2017-08-13 12:00:00	4440	21248	21645.9	-397.892	0.440101
2017-06-02 13:05:00	2225	226.87	226.866	0.00445	0.417833			2017-08-11 23:04:59	2225	226.661	226.667	-0.00565	0.371786			2017-08-13 12:10:00	4450	22528	21645.9	882.115	0.64009
2017-06-02 13:10:00	2230	226.869	226.866	0.00346	0.385617			2017-08-11 23:09:59	2230	226.658	226.667	-0.00862	0.273896			2017-08-13 12:20:00	4460	20608	21645.9	-1037.88	0.340109
2017-06-02 13:15:00	2235	226.871	226.866	0.00547	0.451025			2017-08-11 23:14:59	2235	226.66	226.667	-0.00659	0.340804			2017-08-13 12:30:00	4470	21760	21645.9	114.129	0.520099
2017-06-02 13:20:00	2240	226.87	226.866	0.00448	0.418809			2017-08-11 23:19:59	2240	226.663	226.667	-0.00356	0.440672			2017-08-13 12:40:00	4480	20736	21645.9	-909.864	0.36011
2017-06-02 13:25:00	2245	226.869	226.866	0.00349	0.386593			2017-08-11 23:24:59	2245	226.662	226.667	-0.00453	0.408701			2017-08-13 12:50:00	4490	20992	21645.9	-653.857	0.400109
2017-06-02 13:30:00	2250	226.869	226.865	0.0035	0.386918			2017-08-11 23:29:59	2250	226.662	226.667	-0.0045	0.40969			2017-08-13 13:00:00	4500	20096	21645.8	-1549.85	0.260118
2017-06-02 13:35:00	2255	226.866	226.865	0.00051	0.289619			2017-08-11 23:34:59	2255	226.661	226.666	-0.00547	0.377719			2017-08-13 13:10:00	4510	21120	21645.8	-525.843	0.42011
2017-06-02 13:40:00	2260	226.869	226.865	0.00352	0.387569			2017-08-11 23:39:59	2260	226.662	226.666	-0.00444	0.411668			2017-08-13 13:20:00	4520	20736	21645.8	-909.836	0.360114
2017-06-02 13:45:00	2265	226.868	226.865	0.00253	0.355353			2017-08-11 23:44:59	2265	226.663	226.666	-0.00341	0.445616			2017-08-13 13:30:00	4530	22016	21645.8	370.171	0.560104
2017-06-02 13:50:00	2270	226.869	226.865	0.00354	0.38822			2017-08-11 23:49:59	2270	226.662	226.666	-0.00438	0.413645			2017-08-13 13:40:00	4540	20096	21645.8	-1549.82	0.260122
2017-06-02 13:55:00	2275	226.868	226.865	0.00255	0.356004			2017-08-11 23:54:59	2275	226.662	226.666	-0.00435	0.414634			2017-08-13 13:50:00	4550	20736	21645.8	-909.815	0.360117
2017-06-02 14:00:00	2280	226.87	226.865	0.00456	0.421412			2017-08-11 23:59:59	2280	226.659	226.666	-0.00732	0.316744			2017-08-13 14:00:00	4560	20992	21645.8	-653.808	0.400116
2017-06-02 14:05:00	2285	226.867	226.865	0.00157	0.324113			2017-08-12 00:04:59	2285	226.659	226.666	-0.00729	0.317732			2017-08-13 14:10:00	4570	21760	21645.8	114.199	0.52011
2017-06-02 14:10:00	2290	226.87	226.865	0.00458	0.422063			2017-08-12 00:09:59	2290	226.66	226.666	-0.00626	0.351681			2017-08-13 14:20:00	4580	21504	21645.8	-141.794	0.480114
2017-06-02 14:15:00	2295	226.871	226.865	0.00559	0.45493			2017-08-12 00:14:59	2295	226.66	226.666	-0.00623	0.35267			2017-08-13 14:30:00	4590	20224	21645.8	-1421.79	0.280126
2017-06-02 14:20:00	2300	226.87	226.865	0.0046	0.422714			2017-08-12 00:19:59	2300	226.658	226.666	-0.0082	0.287739			2017-08-13 14:40:00	4600	20352	21645.8	-1293.78	0.300126
2017-06-02 14:25:00	2305	226.869	226.865	0.00361	0.390498			2017-08-12 00:24:59	2305	226.661	226.666	-0.00517	0.387607			2017-08-13 14:50:00	4610	20992	21645.8	-653.773	0.400122
2017-06-02 14:30:00	2310	226.871	226.865	0.00562	0.455906			2017-08-12 00:29:59	2310	226.66	226.666	-0.00614	0.355636			2017-08-13 15:00:00	4620	20224	21645.8	-1421.77	0.28013
2017-06-02 14:35:00	2315	226.873	226.865	0.00763	0.521315			2017-08-12 00:34:59	2315	226.661	226.666	-0.00511	0.389585			2017-08-13 15:10:00	4630	22784	21645.8	1138.24	0.680108
2017-06-02 14:40:00	2320	226.872	226.865	0.00664	0.489099			2017-08-12 00:39:59	2320	226.663	226.666	-0.00308	0.456493			2017-08-13 15:20:00	4640	20864	21645.8	-781.752	0.380126
2017-06-02 14:45:00	2325	226.868	226.865	0.00265	0.359258			2017-08-12 00:44:59	2325	226.662	226.666	-0.00405	0.424522			2017-08-13 15:30:00	4650	21504	21645.7	-141.745	0.480121
2017-06-02 14:50:00	2330	226.87	226.865	0.00466	0.424666			2017-08-12 00:49:59	2330	226.659	226.666	-0.00702	0.326632			2017-08-13 15:40:00	4660	20736	21645.7	-909.738	0.360129
2017-06-02 14:55:00	2335	226.87	226.865	0.00467	0.424992			2017-08-12 00:54:59	2335	226.657	226.666	-0.00899	0.261701			2017-08-13 15:50:00	4670	21504	21645.7	-141.731	0.480124
2017-06-02 15:00:00	2340	226.87	226.865	0.00468	0.425317			2017-08-12 00:59:59	2340	226.658	226.666	-0.00796	0.295649			2017-08-13 16:00:00	4680	20992	21645.7	-653.724	0.400129
2017-06-02 15:05:00	2345	226.87	226.865	0.00469	0.425643			2017-08-12 01:04:59	2345	226.658	226.666	-0.00793	0.296638			2017-08-13 16:10:00	4690	20736	21645.7	-909.717	0.360133
2017-06-02 15:10:00	2350	226.872	226.865	0.0067	0.491051			2017-08-12 01:09:59	2350	226.657	226.666	-0.0089	0.264667			2017-08-13 16:20:00	4700	21248	21645.7	-397.71	0.440129
2017-06-02 15:15:00	2355	226.87	226.865	0.00471	0.426294			2017-08-12 01:14:59	2355	226.658	226.666	-0.00787	0.298616			2017-08-13 16:30:00	4710	21120	21645.7	-525.703	0.420131
2017-06-02 15:20:00	2360	226.867	226.865	0.00172	0.328994			2017-08-12 01:19:59	2360	226.658	226.666	-0.00784	0.299604			2017-08-13 16:40:00	4720	21120	21645.7	-525.696	0.420133
2017-06-02 15:25:00	2365	226.87	226.865	0.00473	0.426944			2017-08-12 01:24:59	2365	226.659	226.666	-0.00681	0.333553			2017-08-13 16:50:00	4730	20864	21645.7	-781.689	0.380136
2017-06-02 15:30:00	2370	226.87	226.865	0.00474	0.42727			2017-08-12 01:29:59	2370	226.66	226.666	-0.00578	0.367502			2017-08-13 17:00:00	4740	20352	21645.7	-1293.68	0.300142
2017-06-02 15:35:00	2375	226.871	226.865	0.00575	0.460137			2017-08-12 01:34:59	2375	226.66	226.666	-0.00575	0.36849			2017-08-13 17:10:00	4750	22016	21645.7	370.325	0.560128
2017-06-02 15:40:00	2380	226.871	226.865	0.00576	0.460462			2017-08-12 01:39:59	2380	226.658	226.666	-0.00772	0.30356			2017-08-13 17:20:00	4760	20992	21645.7	-653.668	0.400138
2017-06-02 15:45:00	2385	226.873	226.865	0.00777	0.52587			2017-08-12 01:44:59	2385	226.659	226.666	-0.00669	0.337508			2017-08-13 17:30:00	4770	21248	21645.7	-397.661	0.440137
2017-06-02 15:50:00	2390	226.871	226.865	0.00578	0.461113			2017-08-12 01:49:59	2390	226.661	226.666	-0.00466	0.404417			2017-08-13 17:40:00	4780	20992	21645.7	-653.654	0.40014
2017-06-02 15:55:00	2395	226.868	226.865	0.00279	0.363814			2017-08-12 01:54:59	2395	226.659	226.666	-0.00663	0.339486			2017-08-13 17:50:00	4790	21248	21645.6	-397.647	0.440139
2017-06-02 16:00:00	2400	226.87	226.865	0.0048	0.429222			2017-08-12 01:59:59	2400	226.66	226.666	-0.0056	0.373434			2017-08-13 18:00:00	4800	20480	21645.6	-1165.64	0.320147
2017-06-02 16:05:00	2405	226.871	226.865	0.00581	0.462089			2017-08-12 02:04:59	2405	226.658	226.666	-0.00757	0.308504			2017-08-13 18:10:00	4810	20608	21645.6	-1037.63	0.340147
2017-06-02 16:10:00	2410	226.869	226.865	0.00382	0.397332			2017-08-12 02:09:59	2410	226.661	226.666	-0.00454	0.408372			2017-08-13 18:20:00	4820	21632	21645.6	-13.626	0.500139
2017-06-02 16:15:00	2415	226.869	226.865	0.00383	0.397657			2017-08-12 02:14:59	2415	226.661	226.666	-0.00451	0.409361			2017-08-13 18:30:00	4830	20864	21645.6	-781.619	0.380147
2017-06-02 16:20:00	2420	226.869	226.865	0.00384	0.397982			2017-08-12 02:19:59	2420	226.66	226.665	-0.00548	0.37739			2017-08-13 18:40:00	4840	21120	21645.6	-525.612	0.420146
2017-06-02 16:25:00	2425	226.868	226.865	0.00285	0.365766			2017-08-12 02:24:59	2425	226.662	226.665	-0.00345	0.444298			2017-08-13 18:50:00	4850	21376	21645.6	-269.605	0.460144
2017-06-02 16:30:00	2430	226.867	226.865	0.00186	0.33355			2017-08-12 02:29:59	2430	226.661	226.665	-0.00442	0.412327			2017-08-13 19:00:00	4860	21760	21645.6	114.402	0.520142
2017-06-02 16:35:00	2435	226.868	226.865	0.00287	0.366417			2017-08-12 02:34:59	2435	226.662	226.665	-0.00339	0.446276			2017-08-13 19:10:00	4870	19968	21645.6	-1677.59	0.240159
2017-06-02 16:40:00	2440	226.869	226.865	0.00388	0.399284			2017-08-12 02:39:59	2440	226.659	226.665	-0.00636	0.348385			2017-08-13 19:20:00	4880	20864	21645.6	-781.584	0.380152
2017-06-02 16:45:00	2445	226.871	226.865	0.00589	0.464692			2017-08-12 02:44:59	2445	226.662	226.665	-0.00333	0.448253			2017-08-13 19:30:00	4890	21120	21645.6	-525.577	0.420151
2017-06-02 16:50:00	2450	226.871	226.865	0.0059	0.465018			2017-08-12 02:49:59	2450	226.664	226.665	-0.0013	0.515162			2017-08-13 19:40:00	4900	21888	21645.6	242.43	0.540145
2017-06-02 16:55:00	2455	226.869	226.865	0.00391	0.40026			2017-08-12 02:54:59	2455	226.658	226.665	-0.00727	0.318392			2017-08-13 19:50:00	4910	20736	21645.6	-909.563	0.360157
2017-06-02 17:00:00	2460	226.872	226.865	0.00692	0.49821			2017-08-12 02:59:59	2460	226.66	226.665	-0.00524	0.3853			2017-08-13 20:00:00	4920	19968	21645.6	-1677.56	0.240165
2017-06-02 17:05:00	2465	226.87	226.865	0.00493	0.433453			2017-08-12 03:04:59	2465	226.661	226.665	-0.00421	0.419249			2017-08-13 20:10:00	4930	20096	21645.5	-1549.55	0.260165
2017-06-02 17:10:00	2470	226.867	226.865	0.00194	0.336154			2017-08-12 03:09:59	2470	226.662	226.665	-0.00318	0.453197			2017-08-13 20:20:00	4940	21120	21645.5	-525.542	0.420157
2017-06-02 17:15:00	2475	226.869	226.865	0.00395	0.401562			2017-08-12 03:14:59	2475	226.661	226.665	-0.00415	0.421226			2017-08-13 20:30:00	4950	21376	21645.5	-269.535	0.460155
2017-06-02 17:20:00	2480	226.87	226.865	0.00496	0.434429			2017-08-12 03:19:59	2480	226.66	226.665	-0.00512	0.389255			2017-08-13 20:40:00	4960	21376	21645.5	-269.528	0.460157
2017-06-02 17:25:00	2485	226.871	226.865	0.00597	0.467296			2017-08-12 03:24:59	2485	226.662	226.665	-0.00309	0.456163			2017-08-13 20:50:00	4970	21504	21645.5	-141.521	0.480156
2017-06-02 17:30:00	2490	226.87	226.865	0.00498	0.43508			2017-08-12 03:29:59	2490	226.658	226.665	-0.00706	0.325313			2017-08-13 21:00:00	4980	21760	21645.5	114.486	0.520155
2017-06-02 17:35:00	2495	226.87	226.865	0.00499	0.435405			2017-08-12 03:34:59	2495	226.658	226.665	-0.00703	0.326302			2017-08-13 21:10:00	4990	22784	21645.5	1138.49	0.680147
2017-06-02 17:40:00	2500	226.866	226.865	0.001	0.305565			2017-08-12 03:39:59	2500	226.662	226.665	-0.003	0.45913			2017-08-13 21:20:00	5000	21248	21645.5	-397.5	0.440162
2017-06-02 17:45:00	2505	226.87	226.865	0.00501	0.436056			2017-08-12 03:44:59	2505	226.66	226.665	-0.00497	0.394199			2017-08-13 21:30:00	5010	21376	21645.5	-269.493	0.460162
2017-06-02 17:50:00	2510	226.87	226.865	0.00502	0.436381			2017-08-12 03:49:59	2510	226.658	226.665	-0.00694	0.329268			2017-08-13 21:40:00	5020	23296	21645.5	1650.51	0.760146
2017-06-02 17:55:00	2515	226.866	226.865	0.00103	0.306541			2017-08-12 03:54:59	2515	226.658	226.665	-0.00691	0.330257			2017-08-13 21:50:00	5030	21760	21645.5	114.521	0.520161
2017-06-02 18:00:00	2520	226.869	226.865	0.00404	0.404491			2017-08-12 03:59:59	2520	226.661	226.665	-0.00388	0.430125			2017-08-13 22:00:00	5040	21376	21645.5	-269.472	0.460165
2017-06-02 18:05:00	2525	226.869	226.865	0.00405	0.404816			2017-08-12 04:04:59	2525	226.66	226.665	-0.00485	0.398154			2017-08-13 22:10:00	5050	22400	21645.5	754.535	0.620157
2017-06-02 18:10:00	2530	226.869	226.865	0.00406	0.405142			2017-08-12 04:09:59	2530	226.659	226.665	-0.00582	0.366183			2017-08-13 22:20:00	5060	19712	21645.5	-1933.46	0.200182
2017-06-02 18:15:00	2535	226.869	226.865	0.00407	0.405467			2017-08-12 04:14:59	2535	226.658	226.665	-0.00679	0.334212			2017-08-13 22:30:00	5070	20608	21645.5	-1037.45	0.340175
2017-06-02 18:20:00	2540	226.869	226.865	0.00408	0.405792			2017-08-12 04:19:59	2540	226.657	226.665	-0.00776	0.302241			2017-08-13 22:40:00	5080	22272	21645.4	626.556	0.600162
2017-06-02 18:25:00	2545	226.869	226.865	0.00409	0.406118			2017-08-12 04:24:59	2545	226.661	226.665	-0.00373	0.435069			2017-08-13 22:50:00	5090	20608	21645.4	-1037.44	0.340178
2017-06-02 18:30:00	2550	226.87	226.865	0.0051	0.438985			2017-08-12 04:29:59	2550	226.66	226.665	-0.0047	0.403098			2017-08-13 23:00:00	5100	21632	21645.4	-13.43	0.50017
2017-06-02 18:35:00	2555	226.867	226.865	0.00211	0.341686			2017-08-12 04:34:59	2555	226.657	226.665	-0.00767	0.305208			2017-08-13 23:10:00	5110	21760	21645.4	114.577	0.520169
2017-06-02 18:40:00	2560	226.869	226.865	0.00412	0.407094			2017-08-12 04:39:59	2560	226.66	226.665	-0.00464	0.405076			2017-08-13 23:20:00	5120	22016	21645.4	370.584	0.560168
2017-06-02 18:45:00	2565	226.87	226.865	0.00513	0.439961			2017-08-12 04:44:59	2565	226.66	226.665	-0.00461	0.406065			2017-08-13 23:30:00	5130	20864	21645.4	-781.409	0.38018
2017-06-02 18:50:00	2570	226.868	226.865	0.00314	0.375203			2017-08-12 04:49:59	2570	226.659	226.665	-0.00558	0.374094			2017-08-13 23:40:00	5140	21504	21645.4	-141.402	0.480175
2017-06-02 18:55:00	2575	226.87	226.865	0.00515	0.440612			2017-08-12 04:54:59	2575	226.66	226.665	-0.00455	0.408042			2017-08-13 23:50:00	5150	22144	21645.4	498.605	0.58017
2017-06-02 19:00:00	2580	226.87	226.865	0.00516	0.440937			2017-08-12 04:59:59	2580	226.66	226.665	-0.00452	0.409031			2017-08-14	5160	22400	21645.4	754.612	0.620169
2017-06-02 19:05:00	2585	226.868	226.865	0.00317	0.37618			2017-08-12 05:04:59	2585	226.662	226.664	-0.00249	0.475939			2017-08-14 00:10:00	5170	21632	21645.4	-13.381	0.500177
2017-06-02 19:10:00	2590	226.864	226.865	-0.00082	0.246339			2017-08-12 05:09:59	2590	226.662	226.664	-0.00246	0.476928			2017-08-14 00:20:00	5180	21888	21645.4	242.626	0.540176
2017-06-02 19:15:00	2595	226.866	226.865	0.00119	0.311747			2017-08-12 05:14:59	2595	226.662	226.664	-0.00243	0.477917			2017-08-14 00:30:00	5190	22272	21645.4	626.633	0.600174
2017-06-02 19:20:00	2600	226.866	226.865	0.0012	0.312073			2017-08-12 05:19:59	2600	226.66	226.664	-0.0044	0.412986			2017-08-14 00:40:00	5200	22144	21645.4	498.64	0.580176
2017-06-02 19:25:00	2605	226.868	226.865	0.00321	0.377481			2017-08-12 05:24:59	2605	226.659	226.664	-0.00537	0.381015			2017-08-14 00:50:00	5210	23040	21645.4	1394.65	0.720169
2017-06-02 19:30:00	2610	226.868	226.865	0.00322	0.377807			2017-08-12 05:29:59	2610	226.663	226.664	-0.00134	0.513843			2017-08-14 01:00:00	5220	21504	21645.3	-141.346	0.480184
2017-06-02 19:35:00	2615	226.87	226.865	0.00523	0.443215			2017-08-12 05:34:59	2615	226.662	226.664	-0.00231	0.481872			2017-08-14 01:10:00	5230	23808	21645.3	2162.66	0.840164
2017-06-02 19:40:00	2620	226.869	226.865	0.00424	0.410999			2017-08-12 05:39:59	2620	226.659	226.664	-0.00528	0.383982			2017-08-14 01:20:00	5240	22016	21645.3	370.668	0.560181
2017-06-02 19:45:00	2625	226.867	226.865	0.00225	0.346241			2017-08-12 05:44:59	2625	226.662	226.664	-0.00225	0.48385			2017-08-14 01:30:00	5250	22784	21645.3	1138.67	0.680176
2017-06-02 19:50:00	2630	226.867	226.865	0.00226	0.346567			2017-08-12 05:49:59	2630	226.66	226.664	-0.00422	0.418919			2017-08-14 01:40:00	5260	21248	21645.3	-397.318	0.44019
2017-06-02 19:55:00	2635	226.867	226.865	0.00227	0.346892			2017-08-12 05:54:59	2635	226.663	226.664	-0.00119	0.518787			2017-08-14 01:50:00	5270	22016	21645.3	370.689	0.560185
2017-06-02 20:00:00	2640	226.867	226.865	0.00228	0.347218			2017-08-12 05:59:59	2640	226.659	226.664	-0.00516	0.387937			2017-08-14 02:00:00	5280	20736	21645.3	-909.304	0.360197
2017-06-02 20:05:00	2645	226.866	226.865	0.00129	0.315002			2017-08-12 06:04:59	2645	226.663	226.664	-0.00113	0.520765			2017-08-14 02:10:00	5290	22272	21645.3	626.703	0.600185
2017-06-02 20:10:00	2650	226.867	226.865	0.0023	0.347869			2017-08-12 06:09:59	2650	226.663	226.664	-0.0011	0.521753			2017-08-14 02:20:00	5300	22016	21645.3	370.71	0.560188
2017-06-02 20:15:00	2655	226.866	226.865	0.00131	0.315652			2017-08-12 06:14:59	2655	226.662	226.664	-0.00207	0.489782			2017-08-14 02:30:00	5310	22784	21645.3	1138.72	0.680182
2017-06-02 20:20:00	2660	226.867	226.865	0.00232	0.348519			2017-08-12 06:19:59	2660	226.659	226.664	-0.00504	0.391892			2017-08-14 02:40:00	5320	22144	21645.3	498.724	0.580189
2017-06-02 20:25:00	2665	226.866	226.865	0.00133	0.316303			2017-08-12 06:24:59	2665	226.662	226.664	-0.00201	0.49176			2017-08-14 02:50:00	5330	21632	21645.3	-13.269	0.500195
2017-06-02 20:30:00	2670	226.864	226.865	-0.00066	0.251546			2017-08-12 06:29:59	2670	226.66	226.664	-0.00398	0.426829			2017-08-14 03:00:00	5340	22656	21645.3	1010.74	0.660187
2017-06-02 20:35:00	2675	226.866	226.865	0.00135	0.316954			2017-08-12 06:34:59	2675	226.662	226.664	-0.00195	0.493738			2017-08-14 03:10:00	5350	22528	21645.3	882.745	0.640189
2017-06-02 20:40:00	2680	226.868	226.865	0.00336	0.382363			2017-08-12 06:39:59	2680	226.657	226.664	-0.00692	0.329927			2017-08-14 03:20:00	5360	22272	21645.2	626.752	0.600192
2017-06-02 20:45:00	2685	226.866	226.865	0.00137	0.317605			2017-08-12 06:44:59	2685	226.659	226.664	-0.00489	0.396836			2017-08-14 03:30:00	5370	21632	21645.2	-13.241	0.500199
2017-06-02 20:50:00	2690	226.865	226.865	0.00038	0.285389			2017-08-12 06:49:59	2690	226.661	226.664	-0.00286	0.463744			2017-08-14 03:40:00	5380	22016	21645.2	370.766	0.560197
2017-06-02 20:55:00	2695	226.865	226.865	0.00039	0.285714			2017-08-12 06:54:59	2695	226.66	226.664	-0.00383	0.431773			2017-08-14 03:50:00	5390	21888	21645.2	242.773	0.540199
2017-06-02 21:00:00	2700	226.866	226.865	0.0014	0.318581			2017-08-12 06:59:59	2700	226.658	226.664	-0.0058	0.366842			2017-08-14 04:00:00	5400	21504	21645.2	-141.22	0.480203
2017-06-02 21:05:00	2705	226.866	226.865	0.00141	0.318907			2017-08-12 07:04:59	2705	226.659	226.664	-0.00477	0.400791			2017-08-14 04:10:00	5410	21376	21645.2	-269.213	0.460206
2017-06-02 21:10:00	2710	226.866	226.865	0.00142	0.319232			2017-08-12 07:09:59	2710	226.659	226.664	-0.00474	0.40178			2017-08-14 04:20:00	5420	21632	21645.2	-13.206	0.500205
2017-06-02 21:15:00	2715	226.864	226.865	-0.00057	0.254474			2017-08-12 07:14:59	2715	226.658	226.664	-0.00571	0.369809			2017-08-14 04:30:00	5430	21376	21645.2	-269.199	0.460208
2017-06-02 21:20:00	2720	226.866	226.865	0.00144	0.319883			2017-08-12 07:19:59	2720	226.661	226.664	-0.00268	0.469677			2017-08-14 04:40:00	5440	20096	21645.2	-1549.19	0.260221
2017-06-02 21:25:00	2725	226.866	226.865	0.00145	0.320208			2017-08-12 07:24:59	2725	226.661	226.664	-0.00265	0.470666			2017-08-14 04:50:00	5450	21376	21645.2	-269.185	0.46021
2017-06-02 21:30:00	2730	226.866	226.865	0.00146	0.320534			2017-08-12 07:29:59	2730	226.658	226.664	-0.00562	0.372775			2017-08-14 05:00:00	5460	21376	21645.2	-269.178	0.460211
2017-06-02 21:35:00	2735	226.867	226.865	0.00247	0.353401			2017-08-12 07:34:59	2735	226.662	226.664	-0.00159	0.505603			2017-08-14 05:10:00	5470	20736	21645.2	-909.171	0.360218
2017-06-02 21:40:00	2740	226.867	226.865	0.00248	0.353726			2017-08-12 07:39:59	2740	226.661	226.664	-0.00256	0.473632			2017-08-14 05:20:00	5480	21888	21645.2	242.836	0.540209
2017-06-02 21:45:00	2745	226.866	226.865	0.00149	0.32151			2017-08-12 07:44:59	2745	226.661	226.664	-0.00253	0.474621			2017-08-14 05:30:00	5490	23296	21645.2	1650.84	0.760197
2017-06-02 21:50:00	2750	226.866	226.864	0.0015	0.321835			2017-08-12 07:49:59	2750	226.662	226.663	-0.0015	0.50857			2017-08-14 05:40:00	5500	21888	21645.2	242.85	0.540211
2017-06-02 21:55:00	2755	226.867	226.864	0.00251	0.354702			2017-08-12 07:54:59	2755	226.661	226.663	-0.00247	0.476599			2017-08-14 05:50:00	5510	22016	21645.1	370.857	0.560211
2017-06-02 22:00:00	2760	226.866	226.864	0.00152	0.322486			2017-08-12 07:59:59	2760	226.66	226.663	-0.00344	0.444628			2017-08-14 06:00:00	5520	21376	21645.1	-269.136	0.460218
2017-06-02 22:05:00	2765	226.867	226.864	0.00253	0.355353			2017-08-12 08:04:59	2765	226.659	226.663	-0.00441	0.412657			2017-08-14 06:10:00	5530	20864	21645.1	-781.129	0.380223
2017-06-02 22:10:00	2770	226.866	226.864	0.00154	0.323137			2017-08-12 08:09:59	2770	226.661	226.663	-0.00238	0.479565			2017-08-14 06:20:00	5540	20608	21645.1	-1037.12	0.340227
2017-06-02 22:15:00	2775	226.866	226.864	0.00155	0.323462			2017-08-12 08:14:59	2775	226.661	226.663	-0.00235	0.480554			2017-08-14 06:30:00	5550	21248	21645.1	-397.115	0.440222
2017-06-02 22:20:00	2780	226.863	226.864	-0.00144	0.226163			2017-08-12 08:19:59	2780	226.662	226.663	-0.00132	0.514502			2017-08-14 06:40:00	5560	22400	21645.1	754.892	0.620213
2017-06-02 22:25:00	2785	226.864	226.864	-0.00043	0.25903			2017-08-12 08:24:59	2785	226.663	226.663	-0.00029	0.548451			2017-08-14 06:50:00	5570	20096	21645.1	-1549.1	0.260235
2017-06-02 22:30:00	2790	226.865	226.864	0.00058	0.291897			2017-08-12 08:29:59	2790	226.66	226.663	-0.00326	0.45056			2017-08-14 07:00:00	5580	20992	21645.1	-653.094	0.400228
2017-06-02 22:35:00	2795	226.867	226.864	0.00259	0.357306			2017-08-12 08:34:59	2795	226.66	226.663	-0.00323	0.451549			2017-08-14 07:10:00	5590	21760	21645.1	114.913	0.520222
2017-06-02 22:40:00	2800	226.865	226.864	0.0006	0.292548			2017-08-12 08:39:59	2800	226.658	226.663	-0.0052	0.386618			2017-08-14 07:20:00	5600	21248	21645.1	-397.08	0.440228
2017-06-02 22:45:00	2805	226.867	226.864	0.00261	0.357956			2017-08-12 08:44:59	2805	226.66	226.663	-0.00317	0.453527			2017-08-14 07:30:00	5610	21248	21645.1	-397.073	0.440229
2017-06-02 22:50:00	2810	226.866	226.864	0.00162	0.32574			2017-08-12 08:49:59	2810	226.661	226.663	-0.00214	0.487475			2017-08-14 07:40:00	5620	22272	21645.1	626.934	0.600221
2017-06-02 22:55:00	2815	226.865	226.864	0.00063	0.293524			2017-08-12 08:54:59	2815	226.661	226.663	-0.00211	0.488464			2017-08-14 07:50:00	5630	22272	21645.1	626.941	0.600222
2017-06-02 23:00:00	2820	226.865	226.864	0.00064	0.29385			2017-08-12 08:59:59	2820	226.661	226.663	-0.00208	0.489453			2017-08-14 08:00:00	5640	22016	21645.1	370.948	0.560225
2017-06-02 23:05:00	2825	226.867	226.864	0.00265	0.359258			2017-08-12 09:04:59	2825	226.66	226.663	-0.00305	0.457482			2017-08-14 08:10:00	5650	20608	21645	-1037.04	0.340239
2017-06-02 23:10:00	2830	226.867	226.864	0.00266	0.359583			2017-08-12 09:09:59	2830	226.661	226.663	-0.00202	0.49143			2017-08-14 08:20:00	5660	21760	21645	114.962	0.52023
2017-06-02 23:15:00	2835	226.865	226.864	0.00067	0.294826			2017-08-12 09:14:59	2835	226.659	226.663	-0.00399	0.4265			2017-08-14 08:30:00	5670	20736	21645	-909.031	0.36024
2017-06-02 23:20:00	2840	226.865	226.864	0.00068	0.295151			2017-08-12 09:19:59	2840	226.661	226.663	-0.00196	0.493408			2017-08-14 08:40:00	5680	22912	21645	1266.98	0.700221
2017-06-02 23:25:00	2845	226.865	226.864	0.00069	0.295477			2017-08-12 09:24:59	2845	226.656	226.663	-0.00693	0.329598			2017-08-14 08:50:00	5690	21760	21645	114.983	0.520233
2017-06-02 23:30:00	2850	226.867	226.864	0.0027	0.360885			2017-08-12 09:29:59	2850	226.658	226.663	-0.0049	0.396506			2017-08-14 09:00:00	5700	21504	21645	-141.01	0.480236
2017-06-02 23:35:00	2855	226.863	226.864	-0.00129	0.231045			2017-08-12 09:34:59	2855	226.662	226.663	-0.00087	0.529334			2017-08-14 09:10:00	5710	22016	21645	370.997	0.560233
2017-06-02 23:40:00	2860	226.867	226.864	0.00272	0.361536			2017-08-12 09:39:59	2860	226.658	226.663	-0.00484	0.398484			2017-08-14 09:20:00	5720	22016	21645	371.004	0.560234
2017-06-02 23:45:00	2865	226.866	226.864	0.00173	0.32932			2017-08-12 09:44:59	2865	226.659	226.663	-0.00381	0.432432			2017-08-14 09:30:00	5730	22400	21645	755.011	0.620231
2017-06-02 23:50:00	2870	226.867	226.864	0.00274	0.362187			2017-08-12 09:49:59	2870	226.661	226.663	-0.00178	0.499341			2017-08-14 09:40:00	5740	21504	21645	-140.982	0.480241
2017-06-02 23:55:00	2875	226.868	226.864	0.00375	0.395054			2017-08-12 09:54:59	2875	226.661	226.663	-0.00175	0.50033			2017-08-14 09:50:00	5750	24192	21645	2547.03	0.900217
2017-06-03	2880	226.866	226.864	0.00176	0.330296			2017-08-12 09:59:59	2880	226.66	226.663	-0.00272	0.468359			2017-08-14 10:00:00	5760	21760	21645	115.032	0.520241
2017-06-03 00:05:00	2885	226.865	226.864	0.00077	0.29808			2017-08-12 10:04:59	2885	226.657	226.663	-0.00569	0.370468			2017-08-14 10:10:00	5770	22656	21645	1011.04	0.660234
2017-06-03 00:10:00	2890	226.865	226.864	0.00078	0.298405			2017-08-12 10:09:59	2890	226.66	226.663	-0.00266	0.470336			2017-08-14 10:20:00	5780	22400	21645	755.046	0.620237
2017-06-03 00:15:00	2895	226.862	226.864	-0.00221	0.201106			2017-08-12 10:14:59	2895	226.66	226.663	-0.00263	0.471325			2017-08-14 10:30:00	5790	23552	21644.9	1907.05	0.800228
2017-06-03 00:20:00	2900	226.866	226.864	0.0018	0.331598			2017-08-12 10:19:59	2900	226.657	226.663	-0.0056	0.373434			2017-08-14 10:40:00	5800	22144	21644.9	499.06	0.580241
2017-06-03 00:25:00	2905	226.865	226.864	0.00081	0.299382			2017-08-12 10:24:59	2905	226.659	226.663	-0.00357	0.440343			2017-08-14 10:50:00	5810	21760	21644.9	115.067	0.520246
2017-06-03 00:30:00	2910	226.868	226.864	0.00382	0.397332			2017-08-12 10:29:59	2910	226.658	226.663	-0.00454	0.408372			2017-08-14 11:00:00	5820	20864	21644.9	-780.926	0.380255
2017-06-03 00:35:00	2915	226.866	226.864	0.00183	0.332574			2017-08-12 10:34:59	2915	226.661	226.663	-0.00151	0.50824			2017-08-14 11:10:00	5830	21760	21644.9	115.081	0.520248
2017-06-03 00:40:00	2920	226.866	226.864	0.00184	0.332899			2017-08-12 10:39:59	2920	226.661	226.662	-0.00148	0.509229			2017-08-14 11:20:00	5840	22400	21644.9	755.088	0.620244
2017-06-03 00:45:00	2925	226.866	226.864	0.00185	0.333225			2017-08-12 10:44:59	2925	226.66	226.662	-0.00245	0.477258			2017-08-14 11:30:00	5850	22528	21644.9	883.095	0.640243
2017-06-03 00:50:00	2930	226.867	226.864	0.00286	0.366092			2017-08-12 10:49:59	2930	226.659	226.662	-0.00342	0.445287			2017-08-14 11:40:00	5860	22272	21644.9	627.102	0.600247
2017-06-03 00:55:00	2935	226.868	226.864	0.00387	0.398959			2017-08-12 10:54:59	2935	226.66	226.662	-0.00239	0.479235			2017-08-14 11:50:00	5870	21888	21644.9	243.109	0.540251
2017-06-03 01:00:00	2940	226.866	226.864	0.00188	0.334201			2017-08-12 10:59:59	2940	226.661	226.662	-0.00136	0.513184			2017-08-14 12:00:00	5880	21632	21644.9	-12.884	0.500255
2017-06-03 01:05:00	2945	226.865	226.864	0.00089	0.301985			2017-08-12 11:04:59	2945	226.661	226.662	-0.00133	0.514173			2017-08-14 12:10:00	5890	21888	21644.9	243.123	0.540254
2017-06-03 01:10:00	2950	226.865	226.864	0.0009	0.30231			2017-08-12 11:09:59	2950	226.657	226.662	-0.0053	0.383322			2017-08-14 12:20:00	5900	21632	21644.9	-12.87	0.500257
2017-06-03 01:15:00	2955	226.865	226.864	0.00091	0.302636			2017-08-12 11:14:59	2955	226.659	226.662	-0.00327	0.450231			2017-08-14 12:30:00	5910	21888	21644.9	243.137	0.540256
2017-06-03 01:20:00	2960	226.864	226.864	-8e-05	0.27042			2017-08-12 11:19:59	2960	226.659	226.662	-0.00324	0.45122			2017-08-14 12:40:00	5920	21504	21644.9	-140.856	0.48026
2017-06-03 01:25:00	2965	226.864	226.864	-7e-05	0.270745			2017-08-12 11:24:59	2965	226.661	226.662	-0.00121	0.518128			2017-08-14 12:50:00	5930	22144	21644.8	499.151	0.580256
2017-06-03 01:30:00	2970	226.867	226.864	0.00294	0.368695			2017-08-12 11:29:59	2970	226.66	226.662	-0.00218	0.486157			2017-08-14 13:00:00	5940	20608	21644.8	-1036.84	0.340271
2017-06-03 01:35:00	2975	226.868	226.864	0.00395	0.401562			2017-08-12 11:34:59	2975	226.659	226.662	-0.00315	0.454186			2017-08-14 13:10:00	5950	19456	21644.8	-2188.83	0.160282
2017-06-03 01:40:00	2980	226.87	226.864	0.00596	0.46697			2017-08-12 11:39:59	2980	226.66	226.662	-0.00212	0.488134			2017-08-14 13:20:00	5960	22016	21644.8	371.172	0.56026
2017-06-03 01:45:00	2985	226.867	226.864	0.00297	0.369671			2017-08-12 11:44:59	2985	226.659	226.662	-0.00309	0.456163			2017-08-14 13:30:00	5970	21376	21644.8	-268.821	0.460267
2017-06-03 01:50:00	2990	226.865	226.864	0.00098	0.304914			2017-08-12 11:49:59	2990	226.657	226.662	-0.00506	0.391233			2017-08-14 13:40:00	5980	20608	21644.8	-1036.81	0.340275
2017-06-03 01:55:00	2995	226.864	226.864	-1e-05	0.272698			2017-08-12 11:54:59	2995	226.661	226.662	-0.00103	0.524061			2017-08-14 13:50:00	5990	21504	21644.8	-140.807	0.480268
2017-06-03 02:00:00	3000	226.866	226.864	0.002	0.338106			2017-08-12 11:59:59	3000	226.658	226.662	-0.004	0.42617			2017-08-14 14:00:00	6000	21504	21644.8	-140.8	0.480269
2017-06-03 02:05:00	3005	226.868	226.864	0.00401	0.403514			2017-08-12 12:04:59	3005	226.656	226.662	-0.00597	0.361239			2017-08-14 14:10:00	6010	20480	21644.8	-1164.79	0.320279
2017-06-03 02:10:00	3010	226.867	226.864	0.00302	0.371298			2017-08-12 12:09:59	3010	226.659	226.662	-0.00294	0.461107			2017-08-14 14:20:00	6020	20224	21644.8	-1420.79	0.280283
2017-06-03 02:15:00	3015	226.866	226.864	0.00203	0.339082			2017-08-12 12:14:59	3015	226.658	226.662	-0.00391	0.429136			2017-08-14 14:30:00	6030	20864	21644.8	-780.779	0.380278
2017-06-03 02:20:00	3020	226.865	226.864	0.00104	0.306866			2017-08-12 12:19:59	3020	226.657	226.662	-0.00488	0.397165			2017-08-14 14:40:00	6040	21376	21644.8	-268.772	0.460275
2017-06-03 02:25:00	3025	226.867	226.864	0.00305	0.372275			2017-08-12 12:24:59	3025	226.658	226.662	-0.00385	0.431114			2017-08-14 14:50:00	6050	20992	21644.8	-652.765	0.400279
2017-06-03 02:30:00	3030	226.865	226.864	0.00106	0.307517			2017-08-12 12:29:59	3030	226.658	226.662	-0.00382	0.432103			2017-08-14 15:00:00	6060	19840	21644.8	-1804.76	0.220291
2017-06-03 02:35:00	3035	226.863	226.864	-0.00093	0.24276			2017-08-12 12:34:59	3035	226.66	226.662	-0.00179	0.499011			2017-08-14 15:10:00	6070	20480	21644.8	-1164.75	0.320286
2017-06-03 02:40:00	3040	226.866	226.864	0.00208	0.340709			2017-08-12 12:39:59	3040	226.655	226.662	-0.00676	0.335201			2017-08-14 15:20:00	6080	20608	21644.7	-1036.74	0.340286
2017-06-03 02:45:00	3045	226.864	226.864	9e-05	0.275952			2017-08-12 12:44:59	3045	226.657	226.662	-0.00473	0.402109			2017-08-14 15:30:00	6090	21120	21644.7	-524.737	0.420282
2017-06-03 02:50:00	3050	226.864	226.864	0.0001	0.276277			2017-08-12 12:49:59	3050	226.657	226.662	-0.0047	0.403098			2017-08-14 15:40:00	6100	21504	21644.7	-140.73	0.48028
2017-06-03 02:55:00	3055	226.865	226.864	0.00111	0.309144			2017-08-12 12:54:59	3055	226.655	226.662	-0.00667	0.338167			2017-08-14 15:50:00	6110	22400	21644.7	755.277	0.620273
2017-06-03 03:00:00	3060	226.864	226.864	0.00012	0.276928			2017-08-12 12:59:59	3060	226.656	226.662	-0.00564	0.372116			2017-08-14 16:00:00	6120	22016	21644.7	371.284	0.560278
2017-06-03 03:05:00	3065	226.867	226.864	0.00313	0.374878			2017-08-12 13:04:59	3065	226.657	226.662	-0.00461	0.406065			2017-08-14 16:10:00	6130	21248	21644.7	-396.709	0.440286
2017-06-03 03:10:00	3070	226.863	226.864	-0.00086	0.245037			2017-08-12 13:09:59	3070	226.655	226.662	-0.00658	0.341134			2017-08-14 16:20:00	6140	20224	21644.7	-1420.7	0.280296
2017-06-03 03:15:00	3075	226.865	226.864	0.00115	0.310446			2017-08-12 13:14:59	3075	226.653	226.662	-0.00855	0.276203			2017-08-14 16:30:00	6150	21760	21644.7	115.305	0.520283
2017-06-03 03:20:00	3080	226.867	226.864	0.00316	0.375854			2017-08-12 13:19:59	3080	226.653	226.662	-0.00852	0.277192			2017-08-14 16:40:00	6160	20608	21644.7	-1036.69	0.340295
2017-06-03 03:25:00	3085	226.864	226.864	0.00017	0.278555			2017-08-12 13:24:59	3085	226.657	226.661	-0.00449	0.41002			2017-08-14 16:50:00	6170	22016	21644.7	371.319	0.560283
2017-06-03 03:30:00	3090	226.865	226.864	0.00118	0.311422			2017-08-12 13:29:59	3090	226.657	226.661	-0.00446	0.411009			2017-08-14 17:00:00	6180	21760	21644.7	115.326	0.520286
2017-06-03 03:35:00	3095	226.866	226.864	0.00219	0.344289			2017-08-12 13:34:59	3095	226.658	226.661	-0.00343	0.444957			2017-08-14 17:10:00	6190	20352	21644.7	-1292.67	0.3003
2017-06-03 03:40:00	3100	226.866	226.864	0.0022	0.344614			2017-08-12 13:39:59	3100	226.658	226.661	-0.0034	0.445946			2017-08-14 17:20:00	6200	19840	21644.7	-1804.66	0.220306
2017-06-03 03:45:00	3105	226.865	226.864	0.00121	0.312398			2017-08-12 13:44:59	3105	226.657	226.661	-0.00437	0.413975			2017-08-14 17:30:00	6210	23040	21644.7	1395.35	0.720278
2017-06-03 03:50:00	3110	226.863	226.864	-0.00078	0.247641			2017-08-12 13:49:59	3110	226.658	226.661	-0.00334	0.447924			2017-08-14 17:40:00	6220	20224	21644.6	-1420.65	0.280305
2017-06-03 03:55:00	3115	226.864	226.864	0.00023	0.280508			2017-08-12 13:54:59	3115	226.658	226.661	-0.00331	0.448912			2017-08-14 17:50:00	6230	20480	21644.6	-1164.64	0.320304
2017-06-03 04:00:00	3120	226.864	226.864	0.00024	0.280833			2017-08-12 13:59:59	3120	226.659	226.661	-0.00228	0.482861			2017-08-14 18:00:00	6240	21120	21644.6	-524.632	0.420299
2017-06-03 04:05:00	3125	226.865	226.864	0.00125	0.3137			2017-08-12 14:04:59	3125	226.657	226.661	-0.00425	0.41793			2017-08-14 18:10:00	6250	20352	21644.6	-1292.62	0.300307
2017-06-03 04:10:00	3130	226.865	226.864	0.00126	0.314025			2017-08-12 14:09:59	3130	226.657	226.661	-0.00422	0.418919			2017-08-14 18:20:00	6260	20864	21644.6	-780.618	0.380303
2017-06-03 04:15:00	3135	226.866	226.864	0.00227	0.346892			2017-08-12 14:14:59	3135	226.659	226.661	-0.00219	0.485827			2017-08-14 18:30:00	6270	21760	21644.6	115.389	0.520296
2017-06-03 04:20:00	3140	226.867	226.864	0.00328	0.379759			2017-08-12 14:19:59	3140	226.657	226.661	-0.00416	0.420897			2017-08-14 18:40:00	6280	20224	21644.6	-1420.6	0.280311
2017-06-03 04:25:00	3145	226.866	226.864	0.00229	0.347543			2017-08-12 14:24:59	3145	226.656	226.661	-0.00513	0.388926			2017-08-14 18:50:00	6290	21376	21644.6	-268.597	0.460302
2017-06-03 04:30:00	3150	226.863	226.864	-0.0007	0.250244			2017-08-12 14:29:59	3150	226.657	226.661	-0.0041	0.422874			2017-08-14 19:00:00	6300	21120	21644.6	-524.59	0.420305
2017-06-03 04:35:00	3155	226.865	226.864	0.00131	0.315652			2017-08-12 14:34:59	3155	226.657	226.661	-0.00407	0.423863			2017-08-14 19:10:00	6310	22144	21644.6	499.417	0.580297
2017-06-03 04:40:00	3160	226.865	226.864	0.00132	0.315978			2017-08-12 14:39:59	3160	226.655	226.661	-0.00604	0.358932			2017-08-14 19:20:00	6320	20096	21644.6	-1548.58	0.260317
2017-06-03 04:45:00	3165	226.864	226.864	0.00033	0.283762			2017-08-12 14:44:59	3165	226.657	226.661	-0.00401	0.42584			2017-08-14 19:30:00	6330	19712	21644.6	-1932.57	0.200321
2017-06-03 04:50:00	3170	226.863	226.864	-0.00066	0.251546			2017-08-12 14:49:59	3170	226.658	226.661	-0.00298	0.459789			2017-08-14 19:40:00	6340	22016	21644.6	371.438	0.560302
2017-06-03 04:55:00	3175	226.864	226.864	0.00035	0.284413			2017-08-12 14:54:59	3175	226.657	226.661	-0.00395	0.427818			2017-08-14 19:50:00	6350	22016	21644.6	371.445	0.560303
2017-06-03 05:00:00	3180	226.863	226.864	-0.00064	0.252197			2017-08-12 14:59:59	3180	226.658	226.661	-0.00292	0.461767			2017-08-14 20:00:00	6360	20736	21644.5	-908.548	0.360315
2017-06-03 05:05:00	3185	226.858	226.864	-0.00563	0.0898145			2017-08-12 15:04:59	3185	226.656	226.661	-0.00489	0.396836			2017-08-14 20:10:00	6370	21632	21644.5	-12.541	0.500308
2017-06-03 05:10:00	3190	226.862	226.864	-0.00162	0.220306			2017-08-12 15:09:59	3190	226.656	226.661	-0.00486	0.397825			2017-08-14 20:20:00	6380	22144	21644.5	499.466	0.580305
2017-06-03 05:15:00	3195	226.865	226.864	0.00139	0.318256			2017-08-12 15:14:59	3195	226.657	226.661	-0.00383	0.431773			2017-08-14 20:30:00	6390	22016	21644.5	371.473	0.560307
2017-06-03 05:20:00	3200	226.863	226.864	-0.0006	0.253498			2017-08-12 15:19:59	3200	226.658	226.661	-0.0028	0.465722			2017-08-14 20:40:00	6400	21248	21644.5	-396.52	0.440315
2017-06-03 05:25:00	3205	226.865	226.864	0.00141	0.318907			2017-08-12 15:24:59	3205	226.656	226.661	-0.00477	0.400791			2017-08-14 20:50:00	6410	21376	21644.5	-268.513	0.460315
2017-06-03 05:30:00	3210	226.862	226.864	-0.00158	0.221608			2017-08-12 15:29:59	3210	226.656	226.661	-0.00474	0.40178			2017-08-14 21:00:00	6420	22016	21644.5	371.494	0.56031
2017-06-03 05:35:00	3215	226.864	226.864	0.00043	0.287016			2017-08-12 15:34:59	3215	226.657	226.661	-0.00371	0.435728			2017-08-14 21:10:00	6430	20480	21644.5	-1164.5	0.320325
2017-06-03 05:40:00	3220	226.862	226.864	-0.00156	0.222258			2017-08-12 15:39:59	3220	226.656	226.661	-0.00468	0.403757			2017-08-14 21:20:00	6440	22016	21644.5	371.508	0.560313
2017-06-03 05:45:00	3225	226.864	226.864	0.00045	0.287667			2017-08-12 15:44:59	3225	226.656	226.661	-0.00465	0.404746			2017-08-14 21:30:00	6450	20096	21644.5	-1548.49	0.260331
2017-06-03 05:50:00	3230	226.865	226.864	0.00146	0.320534			2017-08-12 15:49:59	3230	226.655	226.661	-0.00562	0.372775			2017-08-14 21:40:00	6460	21888	21644.5	243.522	0.540316
2017-06-03 05:55:00	3235	226.864	226.864	0.00047	0.288318			2017-08-12 15:54:59	3235	226.654	226.661	-0.00659	0.340804			2017-08-14 21:50:00	6470	23040	21644.5	1395.53	0.720307
2017-06-03 06:00:00	3240	226.864	226.864	0.00048	0.288643			2017-08-12 15:59:59	3240	226.654	226.661	-0.00656	0.341793			2017-08-14 22:00:00	6480	21504	21644.5	-140.464	0.480322
2017-06-03 06:05:00	3245	226.864	226.864	0.00049	0.288968			2017-08-12 16:04:59	3245	226.656	226.661	-0.00453	0.408701			2017-08-14 22:10:00	6490	22912	21644.5	1267.54	0.70031
2017-06-03 06:10:00	3250	226.863	226.864	-0.0005	0.256752			2017-08-12 16:09:59	3250	226.652	226.661	-0.0085	0.277851			2017-08-14 22:20:00	6500	22144	21644.5	499.55	0.580318
2017-06-03 06:15:00	3255	226.861	226.863	-0.00249	0.191995			2017-08-12 16:14:59	3255	226.657	226.66	-0.00347	0.443639			2017-08-14 22:30:00	6510	21632	21644.4	-12.443	0.500324
2017-06-03 06:20:00	3260	226.865	226.863	0.00152	0.322486			2017-08-12 16:19:59	3260	226.655	226.66	-0.00544	0.378708			2017-08-14 22:40:00	6520	22400	21644.4	755.564	0.620318
2017-06-03 06:25:00	3265	226.865	226.863	0.00153	0.322812			2017-08-12 16:24:59	3265	226.655	226.66	-0.00541	0.379697			2017-08-14 22:50:00	6530	22400	21644.4	755.571	0.620319
2017-06-03 06:30:00	3270	226.863	226.863	-0.00046	0.258054			2017-08-12 16:29:59	3270	226.655	226.66	-0.00538	0.380686			2017-08-14 23:00:00	6540	22400	21644.4	755.578	0.62032
2017-06-03 06:35:00	3275	226.861	226.863	-0.00245	0.193296			2017-08-12 16:34:59	3275	226.653	226.66	-0.00735	0.315755			2017-08-14 23:10:00	6550	22784	21644.4	1139.58	0.680318
2017-06-03 06:40:00	3280	226.862	226.863	-0.00144	0.226163			2017-08-12 16:39:59	3280	226.658	226.66	-0.00232	0.481543			2017-08-14 23:20:00	6560	21248	21644.4	-396.408	0.440333
2017-06-03 06:45:00	3285	226.866	226.863	0.00257	0.356655			2017-08-12 16:44:59	3285	226.657	226.66	-0.00329	0.449572			2017-08-14 23:30:00	6570	23680	21644.4	2035.6	0.820312
2017-06-03 06:50:00	3290	226.864	226.863	0.00058	0.291897			2017-08-12 16:49:59	3290	226.653	226.66	-0.00726	0.318721			2017-08-14 23:40:00	6580	22656	21644.4	1011.61	0.660322
2017-06-03 06:55:00	3295	226.864	226.863	0.00059	0.292223			2017-08-12 16:54:59	3295	226.652	226.66	-0.00823	0.28675			2017-08-14 23:50:00	6590	23168	21644.4	1523.61	0.740319
2017-06-03 07:00:00	3300	226.864	226.863	0.0006	0.292548			2017-08-12 16:59:59	3300	226.655	226.66	-0.0052	0.386618			2017-08-15	6600	22272	21644.4	627.62	0.600328
2017-06-03 07:05:00	3305	226.866	226.863	0.00261	0.357956			2017-08-12 17:04:59	3305	226.655	226.66	-0.00517	0.387607			2017-08-15 00:10:00	6610	20992	21644.4	-652.373	0.40034
2017-06-03 07:10:00	3310	226.863	226.863	-0.00038	0.260657			2017-08-12 17:09:59	3310	226.654	226.66	-0.00614	0.355636			2017-08-15 00:20:00	6620	22400	21644.4	755.634	0.620329
2017-06-03 07:15:00	3315	226.865	226.863	0.00163	0.326066			2017-08-12 17:14:59	3315	226.656	226.66	-0.00411	0.422544			2017-08-15 00:30:00	6630	22144	21644.4	499.641	0.580332
2017-06-03 07:20:00	3320	226.865	226.863	0.00164	0.326391			2017-08-12 17:19:59	3320	226.653	226.66	-0.00708	0.324654			2017-08-15 00:40:00	6640	21888	21644.4	243.648	0.540336
2017-06-03 07:25:00	3325	226.862	226.863	-0.00135	0.229092			2017-08-12 17:24:59	3325	226.654	226.66	-0.00605	0.358603			2017-08-15 00:50:00	6650	22400	21644.3	755.655	0.620332
2017-06-03 07:30:00	3330	226.864	226.863	0.00066	0.2945			2017-08-12 17:29:59	3330	226.65	226.66	-0.01002	0.227752			2017-08-15 01:00:00	6660	23808	21644.3	2163.66	0.84032
2017-06-03 07:35:00	3335	226.866	226.863	0.00267	0.359909			2017-08-12 17:34:59	3335	226.652	226.66	-0.00799	0.294661			2017-08-15 01:10:00	6670	21760	21644.3	115.669	0.52034
2017-06-03 07:40:00	3340	226.86	226.863	-0.00332	0.164985			2017-08-12 17:39:59	3340	226.653	226.66	-0.00696	0.328609			2017-08-15 01:20:00	6680	20736	21644.3	-908.324	0.36035
2017-06-03 07:45:00	3345	226.864	226.863	0.00069	0.295477			2017-08-12 17:44:59	3345	226.656	226.66	-0.00393	0.428477			2017-08-15 01:30:00	6690	20736	21644.3	-908.317	0.360352
2017-06-03 07:50:00	3350	226.865	226.863	0.0017	0.328344			2017-08-12 17:49:59	3350	226.655	226.66	-0.0049	0.396506			2017-08-15 01:40:00	6700	21120	21644.3	-524.31	0.420349
2017-06-03 07:55:00	3355	226.862	226.863	-0.00129	0.231045			2017-08-12 17:54:59	3355	226.652	226.66	-0.00787	0.298616			2017-08-15 01:50:00	6710	21376	21644.3	-268.303	0.460348
2017-06-03 08:00:00	3360	226.865	226.863	0.00172	0.328994			2017-08-12 17:59:59	3360	226.654	226.66	-0.00584	0.365524			2017-08-15 02:00:00	6720	21888	21644.3	243.704	0.540344
2017-06-03 08:05:00	3365	226.863	226.863	-0.00027	0.264237			2017-08-12 18:04:59	3365	226.653	226.66	-0.00681	0.333553			2017-08-15 02:10:00	6730	19712	21644.3	-1932.29	0.200365
2017-06-03 08:10:00	3370	226.866	226.863	0.00274	0.362187			2017-08-12 18:09:59	3370	226.655	226.66	-0.00478	0.400461			2017-08-15 02:20:00	6740	22784	21644.3	1139.72	0.680338
2017-06-03 08:15:00	3375	226.862	226.863	-0.00125	0.232346			2017-08-12 18:14:59	3375	226.654	226.66	-0.00575	0.36849			2017-08-15 02:30:00	6750	22400	21644.3	755.725	0.620343
2017-06-03 08:20:00	3380	226.863	226.863	-0.00024	0.265213			2017-08-12 18:19:59	3380	226.654	226.66	-0.00572	0.369479			2017-08-15 02:40:00	6760	21504	21644.3	-140.268	0.480352
2017-06-03 08:25:00	3385	226.865	226.863	0.00177	0.330622			2017-08-12 18:24:59	3385	226.654	226.66	-0.00569	0.370468			2017-08-15 02:50:00	6770	21760	21644.3	115.739	0.520351
2017-06-03 08:30:00	3390	226.865	226.863	0.00178	0.330947			2017-08-12 18:29:59	3390	226.653	226.66	-0.00666	0.338497			2017-08-15 03:00:00	6780	23040	21644.3	1395.75	0.720341
2017-06-03 08:35:00	3395	226.863	226.863	-0.00021	0.266189			2017-08-12 18:34:59	3395	226.653	226.66	-0.00663	0.339486			2017-08-15 03:10:00	6790	22528	21644.2	883.753	0.640346
2017-06-03 08:40:00	3400	226.864	226.863	0.0008	0.299056			2017-08-12 18:39:59	3400	226.652	226.66	-0.0076	0.307515			2017-08-15 03:20:00	6800	22016	21644.2	371.76	0.560352
2017-06-03 08:45:00	3405	226.865	226.863	0.00181	0.331923			2017-08-12 18:44:59	3405	226.653	226.66	-0.00657	0.341463			2017-08-15 03:30:00	6810	22144	21644.2	499.767	0.580352
2017-06-03 08:50:00	3410	226.864	226.863	0.00082	0.299707			2017-08-12 18:49:59	3410	226.653	226.66	-0.00654	0.342452			2017-08-15 03:40:00	6820	22272	21644.2	627.774	0.600352
2017-06-03 08:55:00	3415	226.861	226.863	-0.00217	0.202408			2017-08-12 18:54:59	3415	226.654	226.66	-0.00551	0.376401			2017-08-15 03:50:00	6830	23040	21644.2	1395.78	0.720346
2017-06-03 09:00:00	3420	226.865	226.863	0.00184	0.332899			2017-08-12 18:59:59	3420	226.65	226.659	-0.00948	0.24555			2017-08-15 04:00:00	6840	23680	21644.2	2035.79	0.820341
2017-06-03 09:05:00	3425	226.866	226.863	0.00285	0.365766			2017-08-12 19:04:59	3425	226.651	226.659	-0.00845	0.279499			2017-08-15 04:10:00	6850	20480	21644.2	-1164.21	0.320371
2017-06-03 09:10:00	3430	226.866	226.863	0.00286	0.366092			2017-08-12 19:09:59	3430	226.651	226.659	-0.00842	0.280488			2017-08-15 04:20:00	6860	20608	21644.2	-1036.2	0.340371
2017-06-03 09:15:00	3435	226.865	226.863	0.00187	0.333876			2017-08-12 19:14:59	3435	226.652	226.659	-0.00739	0.314436			2017-08-15 04:30:00	6870	22144	21644.2	499.809	0.580358
2017-06-03 09:20:00	3440	226.865	226.863	0.00188	0.334201			2017-08-12 19:19:59	3440	226.65	226.659	-0.00936	0.249506			2017-08-15 04:40:00	6880	20736	21644.2	-908.184	0.360372
2017-06-03 09:25:00	3445	226.867	226.863	0.00389	0.39961			2017-08-12 19:24:59	3445	226.655	226.659	-0.00433	0.415293			2017-08-15 04:50:00	6890	22144	21644.2	499.823	0.580361
2017-06-03 09:30:00	3450	226.867	226.863	0.0039	0.399935			2017-08-12 19:29:59	3450	226.651	226.659	-0.0083	0.284443			2017-08-15 05:00:00	6900	22656	21644.2	1011.83	0.660357
2017-06-03 09:35:00	3455	226.862	226.863	-0.00109	0.237553			2017-08-12 19:34:59	3455	226.654	226.659	-0.00527	0.384311			2017-08-15 05:10:00	6910	21376	21644.2	-268.163	0.46037
2017-06-03 09:40:00	3460	226.866	226.863	0.00292	0.368044			2017-08-12 19:39:59	3460	226.655	226.659	-0.00424	0.41826			2017-08-15 05:20:00	6920	21376	21644.2	-268.156	0.460371
2017-06-03 09:45:00	3465	226.867	226.863	0.00393	0.400911			2017-08-12 19:44:59	3465	226.651	226.659	-0.00821	0.287409			2017-08-15 05:30:00	6930	22656	21644.1	1011.85	0.66036
2017-06-03 09:50:00	3470	226.866	226.863	0.00294	0.368695			2017-08-12 19:49:59	3470	226.652	226.659	-0.00718	0.321358			2017-08-15 05:40:00	6940	21504	21644.1	-140.142	0.480372
2017-06-03 09:55:00	3475	226.866	226.863	0.00295	0.369021			2017-08-12 19:54:59	3475	226.653	226.659	-0.00615	0.355307			2017-08-15 05:50:00	6950	21504	21644.1	-140.135	0.480373
2017-06-03 10:00:00	3480	226.864	226.863	0.00096	0.304263			2017-08-12 19:59:59	3480	226.654	226.659	-0.00512	0.389255			2017-08-15 06:00:00	6960	20224	21644.1	-1420.13	0.280386
2017-06-03 10:05:00	3485	226.867	226.863	0.00397	0.402213			2017-08-12 20:04:59	3485	226.65	226.659	-0.00909	0.258405			2017-08-15 06:10:00	6970	21120	21644.1	-524.121	0.420379
2017-06-03 10:10:00	3490	226.869	226.863	0.00598	0.467621			2017-08-12 20:09:59	3490	226.652	226.659	-0.00706	0.325313			2017-08-15 06:20:00	6980	22784	21644.1	1139.89	0.680365
2017-06-03 10:15:00	3495	226.865	226.863	0.00199	0.337781			2017-08-12 20:14:59	3495	226.652	226.659	-0.00703	0.326302			2017-08-15 06:30:00	6990	22656	21644.1	1011.89	0.660367
2017-06-03 10:20:00	3500	226.868	226.863	0.005	0.435731			2017-08-12 20:19:59	3500	226.652	226.659	-0.007	0.327291			2017-08-15 06:40:00	7000	23168	21644.1	1523.9	0.740363
2017-06-03 10:25:00	3505	226.866	226.863	0.00301	0.370973			2017-08-12 20:24:59	3505	226.652	226.659	-0.00697	0.328279			2017-08-15 06:50:00	7010	20224	21644.1	-1420.09	0.280391
2017-06-03 10:30:00	3510	226.869	226.863	0.00602	0.468923			2017-08-12 20:29:59	3510	226.653	226.659	-0.00594	0.362228			2017-08-15 07:00:00	7020	21888	21644.1	243.914	0.540377
2017-06-03 10:35:00	3515	226.866	226.863	0.00303	0.371624			2017-08-12 20:34:59	3515	226.652	226.659	-0.00691	0.330257			2017-08-15 07:10:00	7030	20480	21644.1	-1164.08	0.320391
2017-06-03 10:40:00	3520	226.864	226.863	0.00104	0.306866			2017-08-12 20:39:59	3520	226.65	226.659	-0.00888	0.265326			2017-08-15 07:20:00	7040	23936	21644.1	2291.93	0.860361
2017-06-03 10:45:00	3525	226.865	226.863	0.00205	0.339733			2017-08-12 20:44:59	3525	226.649	226.659	-0.00985	0.233355			2017-08-15 07:30:00	7050	20736	21644.1	-908.065	0.360391
2017-06-03 10:50:00	3530	226.865	226.863	0.00206	0.340059			2017-08-12 20:49:59	3530	226.651	226.659	-0.00782	0.300264			2017-08-15 07:40:00	7060	21376	21644.1	-268.058	0.460386
2017-06-03 10:55:00	3535	226.867	226.863	0.00407	0.405467			2017-08-12 20:54:59	3535	226.649	226.659	-0.00979	0.235333			2017-08-15 07:50:00	7070	20864	21644.1	-780.051	0.380392
2017-06-03 11:00:00	3540	226.868	226.863	0.00508	0.438334			2017-08-12 20:59:59	3540	226.651	226.659	-0.00776	0.302241			2017-08-15 08:00:00	7080	20480	21644	-1164.04	0.320396
2017-06-03 11:05:00	3545	226.869	226.863	0.00609	0.471201			2017-08-12 21:04:59	3545	226.65	226.659	-0.00873	0.27027			2017-08-15 08:10:00	7090	22016	21644	371.963	0.560384
2017-06-03 11:10:00	3550	226.868	226.863	0.0051	0.438985			2017-08-12 21:09:59	3550	226.649	226.659	-0.0097	0.238299			2017-08-15 08:20:00	7100	20864	21644	-780.03	0.380395
2017-06-03 11:15:00	3555	226.87	226.863	0.00711	0.504393			2017-08-12 21:14:59	3555	226.651	226.659	-0.00767	0.305208			2017-08-15 08:30:00	7110	20736	21644	-908.023	0.360397
2017-06-03 11:20:00	3560	226.868	226.863	0.00512	0.439636			2017-08-12 21:19:59	3560	226.651	226.659	-0.00764	0.306196			2017-08-15 08:40:00	7120	22400	21644	755.984	0.620384
2017-06-03 11:25:00	3565	226.87	226.863	0.00713	0.505044			2017-08-12 21:24:59	3565	226.651	226.659	-0.00761	0.307185			2017-08-15 08:50:00	7130	22144	21644	499.991	0.580387
2017-06-03 11:30:00	3570	226.869	226.863	0.00614	0.472828			2017-08-12 21:29:59	3570	226.651	226.659	-0.00758	0.308174			2017-08-15 09:00:00	7140	21120	21644	-524.002	0.420397
2017-06-03 11:35:00	3575	226.869	226.863	0.00615	0.473153			2017-08-12 21:34:59	3575	226.651	226.659	-0.00755	0.309163			2017-08-15 09:10:00	7150	22528	21644	884.005	0.640386
2017-06-03 11:40:00	3580	226.868	226.863	0.00516	0.440937			2017-08-12 21:39:59	3580	226.651	226.659	-0.00752	0.310152			2017-08-15 09:20:00	7160	22272	21644	628.012	0.600389
2017-06-03 11:45:00	3585	226.869	226.863	0.00617	0.473804			2017-08-12 21:44:59	3585	226.651	226.658	-0.00749	0.31114			2017-08-15 09:30:00	7170	21120	21644	-523.981	0.420401
2017-06-03 11:50:00	3590	226.867	226.863	0.00418	0.409047			2017-08-12 21:49:59	3590	226.65	226.658	-0.00846	0.279169			2017-08-15 09:40:00	7180	23040	21644	1396.03	0.720384
2017-06-03 11:55:00	3595	226.869	226.863	0.00619	0.474455			2017-08-12 21:54:59	3595	226.649	226.658	-0.00943	0.247198			2017-08-15 09:50:00	7190	21888	21644	244.033	0.540396
2017-06-03 12:00:00	3600	226.868	226.863	0.0052	0.442239			2017-08-12 21:59:59	3600	226.65	226.658	-0.0084	0.281147			2017-08-15 10:00:00	7200	23680	21644	2036.04	0.820381
2017-06-03 12:05:00	3605	226.871	226.863	0.00821	0.540189			2017-08-12 22:04:59	3605	226.651	226.658	-0.00737	0.315096			2017-08-15 10:10:00	7210	22016	21644	372.047	0.560397
2017-06-03 12:10:00	3610	226.87	226.863	0.00722	0.507973			2017-08-12 22:09:59	3610	226.651	226.658	-0.00734	0.316084			2017-08-15 10:20:00	7220	23552	21643.9	1908.05	0.800384
2017-06-03 12:15:00	3615	226.869	226.863	0.00623	0.475757			2017-08-12 22:14:59	3615	226.651	226.658	-0.00731	0.317073			2017-08-15 10:30:00	7230	21248	21643.9	-395.939	0.440406
2017-06-03 12:20:00	3620	226.87	226.863	0.00724	0.508623			2017-08-12 22:19:59	3620	226.652	226.658	-0.00628	0.351022			2017-08-15 10:40:00	7240	21888	21643.9	244.068	0.540401
2017-06-03 12:25:00	3625	226.868	226.863	0.00525	0.443866			2017-08-12 22:24:59	3625	226.647	226.658	-0.01125	0.187212			2017-08-15 10:50:00	7250	19840	21643.9	-1803.92	0.220421
2017-06-03 12:30:00	3630	226.871	226.863	0.00826	0.541816			2017-08-12 22:29:59	3630	226.649	226.658	-0.00922	0.25412			2017-08-15 11:00:00	7260	21504	21643.9	-139.918	0.480407
2017-06-03 12:35:00	3635	226.87	226.863	0.00727	0.5096			2017-08-12 22:34:59	3635	226.651	226.658	-0.00719	0.321028			2017-08-15 11:10:00	7270	21888	21643.9	244.089	0.540405
2017-06-03 12:40:00	3640	226.87	226.863	0.00728	0.509925			2017-08-12 22:39:59	3640	226.647	226.658	-0.01116	0.190178			2017-08-15 11:20:00	7280	22144	21643.9	500.096	0.580403
2017-06-03 12:45:00	3645	226.87	226.863	0.00729	0.510251			2017-08-12 22:44:59	3645	226.65	226.658	-0.00813	0.290046			2017-08-15 11:30:00	7290	22016	21643.9	372.103	0.560406
2017-06-03 12:50:00	3650	226.87	226.863	0.0073	0.510576			2017-08-12 22:49:59	3650	226.644	226.658	-0.0141	0.0932762			2017-08-15 11:40:00	7300	23040	21643.9	1396.11	0.720397
2017-06-03 12:55:00	3655	226.866	226.863	0.00331	0.380735			2017-08-12 22:54:59	3655	226.646	226.658	-0.01207	0.160185			2017-08-15 11:50:00	7310	22912	21643.9	1268.12	0.7004
2017-06-03 13:00:00	3660	226.87	226.863	0.00732	0.511227			2017-08-12 22:59:59	3660	226.65	226.658	-0.00804	0.293013			2017-08-15 12:00:00	7320	21504	21643.9	-139.876	0.480413
2017-06-03 13:05:00	3665	226.869	226.863	0.00633	0.479011			2017-08-12 23:04:59	3665	226.649	226.658	-0.00901	0.261042			2017-08-15 12:10:00	7330	21120	21643.9	-523.869	0.420418
2017-06-03 13:10:00	3670	226.87	226.863	0.00734	0.511878			2017-08-12 23:09:59	3670	226.651	226.658	-0.00698	0.32795			2017-08-15 12:20:00	7340	22016	21643.9	372.138	0.560411
2017-06-03 13:15:00	3675	226.869	226.863	0.00635	0.479662			2017-08-12 23:14:59	3675	226.65	226.658	-0.00795	0.295979			2017-08-15 12:30:00	7350	22272	21643.9	628.145	0.60041
2017-06-03 13:20:00	3680	226.869	226.863	0.00636	0.479987			2017-08-12 23:19:59	3680	226.649	226.658	-0.00892	0.264008			2017-08-15 12:40:00	7360	22784	21643.8	1140.15	0.680406
2017-06-03 13:25:00	3685	226.869	226.863	0.00637	0.480312			2017-08-12 23:24:59	3685	226.648	226.658	-0.00989	0.232037			2017-08-15 12:50:00	7370	21760	21643.8	116.159	0.520417
2017-06-03 13:30:00	3690	226.869	226.863	0.00638	0.480638			2017-08-12 23:29:59	3690	226.65	226.658	-0.00786	0.298945			2017-08-15 13:00:00	7380	22528	21643.8	884.166	0.640411
2017-06-03 13:35:00	3695	226.87	226.863	0.00739	0.513505			2017-08-12 23:34:59	3695	226.65	226.658	-0.00783	0.299934			2017-08-15 13:10:00	7390	21504	21643.8	-139.827	0.480421
2017-06-03 13:40:00	3700	226.872	226.863	0.0094	0.578913			2017-08-12 23:39:59	3700	226.649	226.658	-0.0088	0.267963			2017-08-15 13:20:00	7400	19712	21643.8	-1931.82	0.200438
2017-06-03 13:45:00	3705	226.87	226.863	0.00741	0.514156			2017-08-12 23:44:59	3705	226.649	226.658	-0.00877	0.268952			2017-08-15 13:30:00	7410	21888	21643.8	244.187	0.54042
2017-06-03 13:50:00	3710	226.87	226.863	0.00742	0.514481			2017-08-12 23:49:59	3710	226.649	226.658	-0.00874	0.269941			2017-08-15 13:40:00	7420	21888	21643.8	244.194	0.540421
2017-06-03 13:55:00	3715	226.871	226.863	0.00843	0.547348			2017-08-12 23:54:59	3715	226.65	226.658	-0.00771	0.303889			2017-08-15 13:50:00	7430	21632	21643.8	-11.799	0.500424
2017-06-03 14:00:00	3720	226.871	226.863	0.00844	0.547673			2017-08-12 23:59:59	3720	226.648	226.658	-0.00968	0.238958			2017-08-15 14:00:00	7440	20864	21643.8	-779.792	0.380432
2017-06-03 14:05:00	3725	226.869	226.863	0.00645	0.482916			2017-08-13 00:04:59	3725	226.647	226.658	-0.01065	0.206987			2017-08-15 14:10:00	7450	20224	21643.8	-1419.78	0.280439
2017-06-03 14:10:00	3730	226.87	226.863	0.00746	0.515783			2017-08-13 00:09:59	3730	226.647	226.658	-0.01062	0.207976			2017-08-15 14:20:00	7460	21248	21643.8	-395.778	0.440431
2017-06-03 14:15:00	3735	226.871	226.863	0.00847	0.54865			2017-08-13 00:14:59	3735	226.65	226.658	-0.00759	0.307844			2017-08-15 14:30:00	7470	20864	21643.8	-779.771	0.380436
2017-06-03 14:20:00	3740	226.873	226.863	0.01048	0.614058			2017-08-13 00:19:59	3740	226.649	226.658	-0.00856	0.275873			2017-08-15 14:40:00	7480	21120	21643.8	-523.764	0.420434
2017-06-03 14:25:00	3745	226.87	226.863	0.00749	0.516759			2017-08-13 00:24:59	3745	226.647	226.658	-0.01053	0.210943			2017-08-15 14:50:00	7490	21760	21643.8	116.243	0.52043
2017-06-03 14:30:00	3750	226.872	226.863	0.0095	0.582167			2017-08-13 00:29:59	3750	226.646	226.657	-0.0115	0.178972			2017-08-15 15:00:00	7500	20992	21643.8	-651.75	0.400438
2017-06-03 14:35:00	3755	226.871	226.862	0.00851	0.549951			2017-08-13 00:34:59	3755	226.646	226.657	-0.01147	0.17996			2017-08-15 15:10:00	7510	21760	21643.7	116.257	0.520432
2017-06-03 14:40:00	3760	226.869	226.862	0.00652	0.485194			2017-08-13 00:39:59	3760	226.647	226.657	-0.01044	0.213909			2017-08-15 15:20:00	7520	21504	21643.7	-139.736	0.480435
2017-06-03 14:45:00	3765	226.87	226.862	0.00753	0.518061			2017-08-13 00:44:59	3765	226.649	226.657	-0.00841	0.280817			2017-08-15 15:30:00	7530	20608	21643.7	-1035.73	0.340445
2017-06-03 14:50:00	3770	226.871	226.862	0.00854	0.550927			2017-08-13 00:49:59	3770	226.646	226.657	-0.01138	0.182927			2017-08-15 15:40:00	7540	21632	21643.7	-11.722	0.500436
2017-06-03 14:55:00	3775	226.871	226.862	0.00855	0.551253			2017-08-13 00:54:59	3775	226.648	226.657	-0.00935	0.249835			2017-08-15 15:50:00	7550	20864	21643.7	-779.715	0.380444
2017-06-03 15:00:00	3780	226.872	226.862	0.00956	0.58412			2017-08-13 00:59:59	3780	226.647	226.657	-0.01032	0.217864			2017-08-15 16:00:00	7560	21376	21643.7	-267.708	0.460441
2017-06-03 15:05:00	3785	226.869	226.862	0.00657	0.486821			2017-08-13 01:04:59	3785	226.647	226.657	-0.01029	0.218853			2017-08-15 16:10:00	7570	20736	21643.7	-907.701	0.360448
2017-06-03 15:10:00	3790	226.872	226.862	0.00958	0.584771			2017-08-13 01:09:59	3790	226.646	226.657	-0.01126	0.186882			2017-08-15 16:20:00	7580	20608	21643.7	-1035.69	0.34045
2017-06-03 15:15:00	3795	226.871	226.862	0.00859	0.552555			2017-08-13 01:14:59	3795	226.646	226.657	-0.01123	0.187871			2017-08-15 16:30:00	7590	20864	21643.7	-779.687	0.380449
2017-06-03 15:20:00	3800	226.869	226.862	0.0066	0.487797			2017-08-13 01:19:59	3800	226.649	226.657	-0.0082	0.287739			2017-08-15 16:40:00	7600	21888	21643.7	244.32	0.540441
2017-06-03 15:25:00	3805	226.872	226.862	0.00961	0.585747			2017-08-13 01:24:59	3805	226.645	226.657	-0.01217	0.156889			2017-08-15 16:50:00	7610	20480	21643.7	-1163.67	0.320454
2017-06-03 15:30:00	3810	226.871	226.862	0.00862	0.553531			2017-08-13 01:29:59	3810	226.644	226.657	-0.01314	0.124918			2017-08-15 17:00:00	7620	19968	21643.7	-1675.67	0.24046
2017-06-03 15:35:00	3815	226.872	226.862	0.00963	0.586398			2017-08-13 01:34:59	3815	226.646	226.657	-0.01111	0.191826			2017-08-15 17:10:00	7630	21376	21643.7	-267.659	0.460449
2017-06-03 15:40:00	3820	226.871	226.862	0.00864	0.554182			2017-08-13 01:39:59	3820	226.645	226.657	-0.01208	0.159855			2017-08-15 17:20:00	7640	21888	21643.7	244.348	0.540445
2017-06-03 15:45:00	3825	226.871	226.862	0.00865	0.554507			2017-08-13 01:44:59	3825	226.645	226.657	-0.01205	0.160844			2017-08-15 17:30:00	7650	20352	21643.6	-1291.65	0.30046
2017-06-03 15:50:00	3830	226.873	226.862	0.01066	0.619915			2017-08-13 01:49:59	3830	226.65	226.657	-0.00702	0.326632			2017-08-15 17:40:00	7660	21760	21643.6	116.362	0.520448
2017-06-03 15:55:00	3835	226.871	226.862	0.00867	0.555158			2017-08-13 01:54:59	3835	226.645	226.657	-0.01199	0.162821			2017-08-15 17:50:00	7670	21760	21643.6	116.369	0.520449
2017-06-03 16:00:00	3840	226.871	226.862	0.00868	0.555483			2017-08-13 01:59:59	3840	226.649	226.657	-0.00796	0.295649			2017-08-15 18:00:00	7680	20992	21643.6	-651.624	0.400457
2017-06-03 16:05:00	3845	226.868	226.862	0.00569	0.458184			2017-08-13 02:04:59	3845	226.648	226.657	-0.00893	0.263678			2017-08-15 18:10:00	7690	21760	21643.6	116.383	0.520452
2017-06-03 16:10:00	3850	226.87	226.862	0.0077	0.523593			2017-08-13 02:09:59	3850	226.649	226.657	-0.0079	0.297627			2017-08-15 18:20:00	7700	20864	21643.6	-779.61	0.380461
2017-06-03 16:15:00	3855	226.871	226.862	0.00871	0.556459			2017-08-13 02:14:59	3855	226.647	226.657	-0.00987	0.232696			2017-08-15 18:30:00	7710	21120	21643.6	-523.603	0.42046
2017-06-03 16:20:00	3860	226.868	226.862	0.00572	0.45916			2017-08-13 02:19:59	3860	226.649	226.657	-0.00784	0.299604			2017-08-15 18:40:00	7720	20096	21643.6	-1547.6	0.26047
2017-06-03 16:25:00	3865	226.868	226.862	0.00573	0.459486			2017-08-13 02:24:59	3865	226.647	226.657	-0.00981	0.234674			2017-08-15 18:50:00	7730	19328	21643.6	-2315.59	0.140478
2017-06-03 16:30:00	3870	226.871	226.862	0.00874	0.557436			2017-08-13 02:29:59	3870	226.648	226.657	-0.00878	0.268622			2017-08-15 19:00:00	7740	21504	21643.6	-139.582	0.480459
2017-06-03 16:35:00	3875	226.872	226.862	0.00975	0.590303			2017-08-13 02:34:59	3875	226.646	226.657	-0.01075	0.203691			2017-08-15 19:10:00	7750	21248	21643.6	-395.575	0.440463
2017-06-03 16:40:00	3880	226.87	226.862	0.00776	0.525545			2017-08-13 02:39:59	3880	226.646	226.657	-0.01072	0.20468			2017-08-15 19:20:00	7760	21120	21643.6	-523.568	0.420465
2017-06-03 16:45:00	3885	226.871	226.862	0.00877	0.558412			2017-08-13 02:44:59	3885	226.647	226.657	-0.00969	0.238629			2017-08-15 19:30:00	7770	22144	21643.6	500.439	0.580457
2017-06-03 16:50:00	3890	226.87	226.862	0.00778	0.526196			2017-08-13 02:49:59	3890	226.647	226.657	-0.00966	0.239618			2017-08-15 19:40:00	7780	19968	21643.6	-1675.55	0.240478
2017-06-03 16:55:00	3895	226.871	226.862	0.00879	0.559063			2017-08-13 02:54:59	3895	226.649	226.657	-0.00763	0.306526			2017-08-15 19:50:00	7790	21760	21643.5	116.453	0.520463
2017-06-03 17:00:00	3900	226.87	226.862	0.0078	0.526847			2017-08-13 02:59:59	3900	226.648	226.657	-0.0086	0.274555			2017-08-15 20:00:00	7800	21760	21643.5	116.46	0.520464
2017-06-03 17:05:00	3905	226.867	226.862	0.00481	0.429548			2017-08-13 03:04:59	3905	226.649	226.657	-0.00757	0.308504			2017-08-15 20:10:00	7810	23168	21643.5	1524.47	0.740452
2017-06-03 17:10:00	3910	226.872	226.862	0.00982	0.592581			2017-08-13 03:09:59	3910	226.648	226.657	-0.00854	0.276533			2017-08-15 20:20:00	7820	21632	21643.5	-11.526	0.500467
2017-06-03 17:15:00	3915	226.871	226.862	0.00883	0.560364			2017-08-13 03:14:59	3915	226.649	226.657	-0.00751	0.310481			2017-08-15 20:30:00	7830	20480	21643.5	-1163.52	0.320479
2017-06-03 17:20:00	3920	226.87	226.862	0.00784	0.528148			2017-08-13 03:19:59	3920	226.648	226.656	-0.00848	0.27851			2017-08-15 20:40:00	7840	22144	21643.5	500.488	0.580465
2017-06-03 17:25:00	3925	226.87	226.862	0.00785	0.528474			2017-08-13 03:24:59	3925	226.646	226.656	-0.01045	0.213579			2017-08-15 20:50:00	7850	21888	21643.5	244.495	0.540468
2017-06-03 17:30:00	3930	226.868	226.862	0.00586	0.463716			2017-08-13 03:29:59	3930	226.649	226.656	-0.00742	0.313448			2017-08-15 21:00:00	7860	20480	21643.5	-1163.5	0.320482
2017-06-03 17:35:00	3935	226.871	226.862	0.00887	0.561666			2017-08-13 03:34:59	3935	226.645	226.656	-0.01139	0.182597			2017-08-15 21:10:00	7870	21760	21643.5	116.509	0.520471
2017-06-03 17:40:00	3940	226.869	226.862	0.00688	0.496909			2017-08-13 03:39:59	3940	226.649	226.656	-0.00736	0.315425			2017-08-15 21:20:00	7880	22272	21643.5	628.516	0.600468
2017-06-03 17:45:00	3945	226.872	226.862	0.00989	0.594858			2017-08-13 03:44:59	3945	226.646	226.656	-0.01033	0.217535			2017-08-15 21:30:00	7890	21760	21643.5	116.523	0.520474
2017-06-03 17:50:00	3950	226.871	226.862	0.0089	0.562642			2017-08-13 03:49:59	3950	226.649	226.656	-0.0073	0.317403			2017-08-15 21:40:00	7900	21376	21643.5	-267.47	0.460478
2017-06-03 17:55:00	3955	226.871	226.862	0.00891	0.562968			2017-08-13 03:54:59	3955	226.645	226.656	-0.01127	0.186552			2017-08-15 21:50:00	7910	21888	21643.5	244.537	0.540475
2017-06-03 18:00:00	3960	226.872	226.862	0.00992	0.595835			2017-08-13 03:59:59	3960	226.648	226.656	-0.00824	0.286421			2017-08-15 22:00:00	7920	22016	21643.5	372.544	0.560474
2017-06-03 18:05:00	3965	226.868	226.862	0.00593	0.465994			2017-08-13 04:04:59	3965	226.646	226.656	-0.01021	0.22149			2017-08-15 22:10:00	7930	23296	21643.4	1652.55	0.760464
2017-06-03 18:10:00	3970	226.868	226.862	0.00594	0.46632			2017-08-13 04:09:59	3970	226.644	226.656	-0.01218	0.156559			2017-08-15 22:20:00	7940	21376	21643.4	-267.442	0.460482
2017-06-03 18:15:00	3975	226.871	226.862	0.00895	0.564269			2017-08-13 04:14:59	3975	226.647	226.656	-0.00915	0.256427			2017-08-15 22:30:00	7950	23808	21643.4	2164.56	0.840462
2017-06-03 18:20:00	3980	226.869	226.862	0.00696	0.499512			2017-08-13 04:19:59	3980	226.648	226.656	-0.00812	0.290376			2017-08-15 22:40:00	7960	22272	21643.4	628.572	0.600477
2017-06-03 18:25:00	3985	226.871	226.862	0.00897	0.56492			2017-08-13 04:24:59	3985	226.647	226.656	-0.00909	0.258405			2017-08-15 22:50:00	7970	20864	21643.4	-779.421	0.38049
2017-06-03 18:30:00	3990	226.866	226.862	0.00398	0.402538			2017-08-13 04:29:59	3990	226.646	226.656	-0.01006	0.226434			2017-08-15 23:00:00	7980	21504	21643.4	-139.414	0.480486
2017-06-03 18:35:00	3995	226.87	226.862	0.00799	0.53303			2017-08-13 04:34:59	3995	226.649	226.656	-0.00703	0.326302			2017-08-15 23:10:00	7990	23936	21643.4	2292.59	0.860465
2017-06-03 18:40:00	4000	226.869	226.862	0.007	0.500814			2017-08-13 04:39:59	4000	226.647	226.656	-0.009	0.261371			2017-08-15 23:20:00	8000	21632	21643.4	-11.4	0.500487
2017-06-03 18:45:00	4005	226.87	226.862	0.00801	0.53368			2017-08-13 04:44:59	4005	226.649	226.656	-0.00697	0.328279			2017-08-15 23:30:00	8010	22528	21643.4	884.607	0.64048
2017-06-03 18:50:00	4010	226.868	226.862	0.00602	0.468923			2017-08-13 04:49:59	4010	226.647	226.656	-0.00894	0.263349			2017-08-15 23:40:00	8020	23552	21643.4	1908.61	0.800472
2017-06-03 18:55:00	4015	226.868	226.862	0.00603	0.469248			2017-08-13 04:54:59	4015	226.647	226.656	-0.00891	0.264338			2017-08-15 23:50:00	8030	22272	21643.4	628.621	0.600484
2017-06-03 19:00:00	4020	226.868	226.862	0.00604	0.469574			2017-08-13 04:59:59	4020	226.646	226.656	-0.00988	0.232367			2017-08-16	8040	20608	21643.4	-1035.37	0.3405
2017-06-03 19:05:00	4025	226.868	226.862	0.00605	0.469899			2017-08-13 05:04:59	4025	226.649	226.656	-0.00685	0.332235			2017-08-16 00:10:00	8050	22400	21643.4	756.635	0.620485
2017-06-03 19:10:00	4030	226.869	226.862	0.00706	0.502766			2017-08-13 05:09:59	4030	226.646	226.656	-0.00982	0.234344			2017-08-16 00:20:00	8060	22656	21643.4	1012.64	0.660484
2017-06-03 19:15:00	4035	226.866	226.862	0.00407	0.405467			2017-08-13 05:14:59	4035	226.645	226.656	-0.01079	0.202373			2017-08-16 00:30:00	8070	21760	21643.4	116.649	0.520493
2017-06-03 19:20:00	4040	226.87	226.862	0.00808	0.535958			2017-08-13 05:19:59	4040	226.645	226.656	-0.01076	0.203362			2017-08-16 00:40:00	8080	21888	21643.3	244.656	0.540493
2017-06-03 19:25:00	4045	226.869	226.862	0.00709	0.503742			2017-08-13 05:24:59	4045	226.647	226.656	-0.00873	0.27027			2017-08-16 00:50:00	8090	21248	21643.3	-395.337	0.4405
2017-06-03 19:30:00	4050	226.868	226.862	0.0061	0.471526			2017-08-13 05:29:59	4050	226.648	226.656	-0.0077	0.304219			2017-08-16 01:00:00	8100	22400	21643.3	756.67	0.620491
2017-06-03 19:35:00	4055	226.87	226.862	0.00811	0.536935			2017-08-13 05:34:59	4055	226.644	226.656	-0.01167	0.173368			2017-08-16 01:10:00	8110	22016	21643.3	372.677	0.560495
2017-06-03 19:40:00	4060	226.869	226.862	0.00712	0.504719			2017-08-13 05:39:59	4060	226.645	226.656	-0.01064	0.207317			2017-08-16 01:20:00	8120	21504	21643.3	-139.316	0.480501
2017-06-03 19:45:00	4065	226.869	226.862	0.00713	0.505044			2017-08-13 05:44:59	4065	226.648	226.656	-0.00761	0.307185			2017-08-16 01:30:00	8130	21376	21643.3	-267.309	0.460503
2017-06-03 19:50:00	4070	226.869	226.862	0.00714	0.505369			2017-08-13 05:49:59	4070	226.648	226.656	-0.00758	0.308174			2017-08-16 01:40:00	8140	22144	21643.3	500.698	0.580497
2017-06-03 19:55:00	4075	226.869	226.862	0.00715	0.505695			2017-08-13 05:54:59	4075	226.646	226.656	-0.00955	0.243243			2017-08-16 01:50:00	8150	23040	21643.3	1396.71	0.72049
2017-06-03 20:00:00	4080	226.868	226.862	0.00616	0.473479			2017-08-13 05:59:59	4080	226.647	226.656	-0.00852	0.277192			2017-08-16 02:00:00	8160	21376	21643.3	-267.288	0.460507
2017-06-03 20:05:00	4085	226.866	226.862	0.00417	0.408721			2017-08-13 06:04:59	4085	226.648	226.655	-0.00749	0.31114			2017-08-16 02:10:00	8170	22784	21643.3	1140.72	0.680495
2017-06-03 20:10:00	4090	226.866	226.862	0.00418	0.409047			2017-08-13 06:09:59	4090	226.646	226.655	-0.00946	0.24621			2017-08-16 02:20:00	8180	22144	21643.3	500.726	0.580502
2017-06-03 20:15:00	4095	226.87	226.862	0.00819	0.539538			2017-08-13 06:14:59	4095	226.644	226.655	-0.01143	0.181279			2017-08-16 02:30:00	8190	21376	21643.3	-267.267	0.46051
2017-06-03 20:20:00	4100	226.869	226.862	0.0072	0.507322			2017-08-13 06:19:59	4100	226.646	226.655	-0.0094	0.248187			2017-08-16 02:40:00	8200	21888	21643.3	244.74	0.540506
2017-06-03 20:25:00	4105	226.866	226.862	0.00421	0.410023			2017-08-13 06:24:59	4105	226.647	226.655	-0.00837	0.282136			2017-08-16 02:50:00	8210	22272	21643.3	628.747	0.600504
2017-06-03 20:30:00	4110	226.868	226.862	0.00622	0.475431			2017-08-13 06:29:59	4110	226.646	226.655	-0.00934	0.250165			2017-08-16 03:00:00	8220	22528	21643.2	884.754	0.640503
2017-06-03 20:35:00	4115	226.869	226.862	0.00723	0.508298			2017-08-13 06:34:59	4115	226.645	226.655	-0.01031	0.218194			2017-08-16 03:10:00	8230	22656	21643.2	1012.76	0.660503
2017-06-03 20:40:00	4120	226.868	226.862	0.00624	0.476082			2017-08-13 06:39:59	4120	226.645	226.655	-0.01028	0.219183			2017-08-16 03:20:00	8240	22400	21643.2	756.768	0.620506
2017-06-03 20:45:00	4125	226.867	226.862	0.00525	0.443866			2017-08-13 06:44:59	4125	226.647	226.655	-0.00825	0.286091			2017-08-16 03:30:00	8250	21504	21643.2	-139.225	0.480515
2017-06-03 20:50:00	4130	226.866	226.862	0.00426	0.41165			2017-08-13 06:49:59	4130	226.648	226.655	-0.00722	0.32004			2017-08-16 03:40:00	8260	21888	21643.2	244.782	0.540513
2017-06-03 20:55:00	4135	226.865	226.862	0.00327	0.379434			2017-08-13 06:54:59	4135	226.646	226.655	-0.00919	0.255109			2017-08-16 03:50:00	8270	22144	21643.2	500.789	0.580512
2017-06-03 21:00:00	4140	226.87	226.862	0.00828	0.542467			2017-08-13 06:59:59	4140	226.645	226.655	-0.01016	0.223138			2017-08-16 04:00:00	8280	21760	21643.2	116.796	0.520516
2017-06-03 21:05:00	4145	226.868	226.862	0.00629	0.477709			2017-08-13 07:04:59	4145	226.647	226.655	-0.00813	0.290046			2017-08-16 04:10:00	8290	20736	21643.2	-907.197	0.360527
2017-06-03 21:10:00	4150	226.869	226.862	0.0073	0.510576			2017-08-13 07:09:59	4150	226.644	226.655	-0.0111	0.192156			2017-08-16 04:20:00	8300	20992	21643.2	-651.19	0.400525
2017-06-03 21:15:00	4155	226.867	226.862	0.00531	0.445818			2017-08-13 07:14:59	4155	226.647	226.655	-0.00807	0.292024			2017-08-16 04:30:00	8310	22016	21643.2	372.817	0.560517
2017-06-03 21:20:00	4160	226.866	226.862	0.00432	0.413602			2017-08-13 07:19:59	4160	226.646	226.655	-0.00904	0.260053			2017-08-16 04:40:00	8320	23296	21643.2	1652.82	0.760507
2017-06-03 21:25:00	4165	226.868	226.862	0.00633	0.479011			2017-08-13 07:24:59	4165	226.646	226.655	-0.00901	0.261042			2017-08-16 04:50:00	8330	21120	21643.2	-523.169	0.420527
2017-06-03 21:30:00	4170	226.866	226.862	0.00434	0.414253			2017-08-13 07:29:59	4170	226.648	226.655	-0.00698	0.32795			2017-08-16 05:00:00	8340	22912	21643.2	1268.84	0.700512
2017-06-03 21:35:00	4175	226.866	226.862	0.00435	0.414579			2017-08-13 07:34:59	4175	226.646	226.655	-0.00895	0.263019			2017-08-16 05:10:00	8350	20736	21643.2	-907.155	0.360533
2017-06-03 21:40:00	4180	226.867	226.862	0.00536	0.447445			2017-08-13 07:39:59	4180	226.648	226.655	-0.00692	0.329927			2017-08-16 05:20:00	8360	22656	21643.1	1012.85	0.660517
2017-06-03 21:45:00	4185	226.865	226.862	0.00337	0.382688			2017-08-13 07:44:59	4185	226.65	226.655	-0.00489	0.396836			2017-08-16 05:30:00	8370	21376	21643.1	-267.141	0.460529
2017-06-03 21:50:00	4190	226.868	226.862	0.00638	0.480638			2017-08-13 07:49:59	4190	226.647	226.655	-0.00786	0.298945			2017-08-16 05:40:00	8380	22784	21643.1	1140.87	0.680518
2017-06-03 21:55:00	4195	226.867	226.862	0.00539	0.448422			2017-08-13 07:54:59	4195	226.645	226.655	-0.00983	0.234015			2017-08-16 05:50:00	8390	21760	21643.1	116.873	0.520528
2017-06-03 22:00:00	4200	226.867	226.862	0.0054	0.448747			2017-08-13 07:59:59	4200	226.647	226.655	-0.0078	0.300923			2017-08-16 06:00:00	8400	23040	21643.1	1396.88	0.720518
2017-06-03 22:05:00	4205	226.87	226.862	0.00841	0.546697			2017-08-13 08:04:59	4205	226.648	226.655	-0.00677	0.334871			2017-08-16 06:10:00	8410	21632	21643.1	-11.113	0.500532
2017-06-03 22:10:00	4210	226.869	226.862	0.00742	0.514481			2017-08-13 08:09:59	4210	226.646	226.655	-0.00874	0.269941			2017-08-16 06:20:00	8420	22528	21643.1	884.894	0.640525
2017-06-03 22:15:00	4215	226.866	226.862	0.00443	0.417182			2017-08-13 08:14:59	4215	226.648	226.655	-0.00671	0.336849			2017-08-16 06:30:00	8430	21120	21643.1	-523.099	0.420538
2017-06-03 22:20:00	4220	226.868	226.862	0.00644	0.48259			2017-08-13 08:19:59	4220	226.644	226.655	-0.01068	0.205999			2017-08-16 06:40:00	8440	21760	21643.1	116.908	0.520534
2017-06-03 22:25:00	4225	226.868	226.862	0.00645	0.482916			2017-08-13 08:24:59	4225	226.646	226.655	-0.00865	0.272907			2017-08-16 06:50:00	8450	21888	21643.1	244.915	0.540534
2017-06-03 22:30:00	4230	226.867	226.862	0.00546	0.4507			2017-08-13 08:29:59	4230	226.646	226.655	-0.00862	0.273896			2017-08-16 07:00:00	8460	20992	21643.1	-651.078	0.400543
2017-06-03 22:35:00	4235	226.869	226.862	0.00747	0.516108			2017-08-13 08:34:59	4235	226.648	226.655	-0.00659	0.340804			2017-08-16 07:10:00	8470	22912	21643.1	1268.93	0.700527
2017-06-03 22:40:00	4240	226.867	226.862	0.00548	0.45135			2017-08-13 08:39:59	4240	226.644	226.655	-0.01056	0.209954			2017-08-16 07:20:00	8480	22528	21643.1	884.936	0.640531
2017-06-03 22:45:00	4245	226.865	226.862	0.00349	0.386593			2017-08-13 08:44:59	4245	226.644	226.655	-0.01053	0.210943			2017-08-16 07:30:00	8490	20608	21643.1	-1035.06	0.34055
2017-06-03 22:50:00	4250	226.868	226.862	0.0065	0.484543			2017-08-13 08:49:59	4250	226.647	226.655	-0.0075	0.310811			2017-08-16 07:40:00	8500	22016	21643	372.95	0.560538
2017-06-03 22:55:00	4255	226.868	226.861	0.00651	0.484868			2017-08-13 08:54:59	4255	226.646	226.654	-0.00847	0.27884			2017-08-16 07:50:00	8510	22144	21643	500.957	0.580538
2017-06-03 23:00:00	4260	226.866	226.861	0.00452	0.420111			2017-08-13 08:59:59	4260	226.645	226.654	-0.00944	0.246869			2017-08-16 08:00:00	8520	21504	21643	-139.036	0.480545
2017-06-03 23:05:00	4265	226.868	226.861	0.00653	0.485519			2017-08-13 09:04:59	4265	226.648	226.654	-0.00641	0.346737			2017-08-16 08:10:00	8530	21632	21643	-11.029	0.500545
2017-06-03 23:10:00	4270	226.865	226.861	0.00354	0.38822			2017-08-13 09:09:59	4270	226.644	226.654	-0.01038	0.215887			2017-08-16 08:20:00	8540	20992	21643	-651.022	0.400552
2017-06-03 23:15:00	4275	226.87	226.861	0.00855	0.551253			2017-08-13 09:14:59	4275	226.645	226.654	-0.00935	0.249835			2017-08-16 08:30:00	8550	21120	21643	-523.015	0.420551
2017-06-03 23:20:00	4280	226.868	226.861	0.00656	0.486495			2017-08-13 09:19:59	4280	226.645	226.654	-0.00932	0.250824			2017-08-16 08:40:00	8560	21376	21643	-267.008	0.46055
2017-06-03 23:25:00	4285	226.867	226.861	0.00557	0.454279			2017-08-13 09:24:59	4285	226.646	226.654	-0.00829	0.284773			2017-08-16 08:50:00	8570	22528	21643	884.999	0.640541
2017-06-03 23:30:00	4290	226.865	226.861	0.00358	0.389522			2017-08-13 09:29:59	4290	226.646	226.654	-0.00826	0.285761			2017-08-16 09:00:00	8580	22656	21643	1013.01	0.660541
2017-06-03 23:35:00	4295	226.867	226.861	0.00559	0.45493			2017-08-13 09:34:59	4295	226.645	226.654	-0.00923	0.25379			2017-08-16 09:10:00	8590	21120	21643	-522.987	0.420556
2017-06-03 23:40:00	4300	226.868	226.861	0.0066	0.487797			2017-08-13 09:39:59	4300	226.647	226.654	-0.0072	0.320699			2017-08-16 09:20:00	8600	21632	21643	-10.98	0.500552
2017-06-03 23:45:00	4305	226.869	226.861	0.00761	0.520664			2017-08-13 09:44:59	4305	226.645	226.654	-0.00917	0.255768			2017-08-16 09:30:00	8610	23168	21643	1525.03	0.74054
2017-06-03 23:50:00	4310	226.866	226.861	0.00462	0.423365			2017-08-13 09:49:59	4310	226.646	226.654	-0.00814	0.289717			2017-08-16 09:40:00	8620	22144	21643	501.034	0.58055
2017-06-03 23:55:00	4315	226.868	226.861	0.00663	0.488773			2017-08-13 09:54:59	4315	226.644	226.654	-0.01011	0.224786			2017-08-16 09:50:00	8630	23168	21643	1525.04	0.740542
2017-06-04	4320	226.867	226.861	0.00564	0.456557			2017-08-13 09:59:59	4320	226.648	226.654	-0.00608	0.357614			2017-08-16 10:00:00	8640	21120	21643	-522.952	0.420561
2017-06-04 00:05:00	4325	226.867	226.861	0.00565	0.456883			2017-08-13 10:04:59	4325	226.648	226.654	-0.00605	0.358603			2017-08-16 10:10:00	8650	20864	21642.9	-778.945	0.380565
2017-06-04 00:10:00	4330	226.868	226.861	0.00666	0.489749			2017-08-13 10:09:59	4330	226.642	226.654	-0.01202	0.161833			2017-08-16 10:20:00	8660	22528	21642.9	885.062	0.640551
2017-06-04 00:15:00	4335	226.869	226.861	0.00767	0.522616			2017-08-13 10:14:59	4335	226.644	226.654	-0.00999	0.228741			2017-08-16 10:30:00	8670	21760	21642.9	117.069	0.520559
2017-06-04 00:20:00	4340	226.867	226.861	0.00568	0.457859			2017-08-13 10:19:59	4340	226.645	226.654	-0.00896	0.26269			2017-08-16 10:40:00	8680	22528	21642.9	885.076	0.640553
2017-06-04 00:25:00	4345	226.865	226.861	0.00369	0.393101			2017-08-13 10:24:59	4345	226.647	226.654	-0.00693	0.329598			2017-08-16 10:50:00	8690	20864	21642.9	-778.917	0.380569
2017-06-04 00:30:00	4350	226.867	226.861	0.0057	0.45851			2017-08-13 10:29:59	4350	226.646	226.654	-0.0079	0.297627			2017-08-16 11:00:00	8700	22144	21642.9	501.09	0.580559
2017-06-04 00:35:00	4355	226.868	226.861	0.00671	0.491377			2017-08-13 10:34:59	4355	226.645	226.654	-0.00887	0.265656			2017-08-16 11:10:00	8710	23040	21642.9	1397.1	0.720552
2017-06-04 00:40:00	4360	226.868	226.861	0.00672	0.491702			2017-08-13 10:39:59	4360	226.642	226.654	-0.01184	0.167765			2017-08-16 11:20:00	8720	21888	21642.9	245.104	0.540563
2017-06-04 00:45:00	4365	226.868	226.861	0.00673	0.492027			2017-08-13 10:44:59	4365	226.646	226.654	-0.00781	0.300593			2017-08-16 11:30:00	8730	21760	21642.9	117.111	0.520565
2017-06-04 00:50:00	4370	226.866	226.861	0.00474	0.42727			2017-08-13 10:49:59	4370	226.645	226.654	-0.00878	0.268622			2017-08-16 11:40:00	8740	21120	21642.9	-522.882	0.420572
2017-06-04 00:55:00	4375	226.864	226.861	0.00275	0.362512			2017-08-13 10:54:59	4375	226.648	226.654	-0.00575	0.36849			2017-08-16 11:50:00	8750	21632	21642.9	-10.875	0.500569
2017-06-04 01:00:00	4380	226.868	226.861	0.00676	0.493004			2017-08-13 10:59:59	4380	226.644	226.654	-0.00972	0.23764			2017-08-16 12:00:00	8760	22784	21642.9	1141.13	0.680559
2017-06-04 01:05:00	4385	226.87	226.861	0.00877	0.558412			2017-08-13 11:04:59	4385	226.645	226.654	-0.00869	0.271589			2017-08-16 12:10:00	8770	20992	21642.9	-650.861	0.400577
2017-06-04 01:10:00	4390	226.869	226.861	0.00778	0.526196			2017-08-13 11:09:59	4390	226.646	226.654	-0.00766	0.305537			2017-08-16 12:20:00	8780	22656	21642.9	1013.15	0.660563
2017-06-04 01:15:00	4395	226.869	226.861	0.00779	0.526521			2017-08-13 11:14:59	4395	226.647	226.654	-0.00663	0.339486			2017-08-16 12:30:00	8790	22400	21642.8	757.153	0.620566
2017-06-04 01:20:00	4400	226.867	226.861	0.0058	0.461764			2017-08-13 11:19:59	4400	226.646	226.654	-0.0076	0.307515			2017-08-16 12:40:00	8800	22656	21642.8	1013.16	0.660565
2017-06-04 01:25:00	4405	226.867	226.861	0.00581	0.462089			2017-08-13 11:24:59	4405	226.646	226.654	-0.00757	0.308504			2017-08-16 12:50:00	8810	22016	21642.8	373.167	0.560572
2017-06-04 01:30:00	4410	226.866	226.861	0.00482	0.429873			2017-08-13 11:29:59	4410	226.646	226.654	-0.00754	0.309492			2017-08-16 13:00:00	8820	22912	21642.8	1269.17	0.700565
2017-06-04 01:35:00	4415	226.866	226.861	0.00483	0.430199			2017-08-13 11:34:59	4415	226.646	226.654	-0.00751	0.310481			2017-08-16 13:10:00	8830	21376	21642.8	-266.819	0.46058
2017-06-04 01:40:00	4420	226.869	226.861	0.00784	0.528148			2017-08-13 11:39:59	4420	226.646	226.653	-0.00748	0.31147			2017-08-16 13:20:00	8840	21376	21642.8	-266.812	0.460581
2017-06-04 01:45:00	4425	226.867	226.861	0.00585	0.463391			2017-08-13 11:44:59	4425	226.647	226.653	-0.00645	0.345419			2017-08-16 13:30:00	8850	20608	21642.8	-1034.81	0.340589
2017-06-04 01:50:00	4430	226.867	226.861	0.00586	0.463716			2017-08-13 11:49:59	4430	226.645	226.653	-0.00842	0.280488			2017-08-16 13:40:00	8860	20992	21642.8	-650.798	0.400587
2017-06-04 01:55:00	4435	226.868	226.861	0.00687	0.496583			2017-08-13 11:54:59	4435	226.645	226.653	-0.00839	0.281477			2017-08-16 13:50:00	8870	22912	21642.8	1269.21	0.70057
2017-06-04 02:00:00	4440	226.867	226.861	0.00588	0.464367			2017-08-13 11:59:59	4440	226.646	226.653	-0.00736	0.315425			2017-08-16 14:00:00	8880	20736	21642.8	-906.784	0.360591
2017-06-04 02:05:00	4445	226.87	226.861	0.00889	0.562317			2017-08-13 12:04:59	4445	226.645	226.653	-0.00833	0.283454			2017-08-16 14:10:00	8890	20992	21642.8	-650.777	0.40059
2017-06-04 02:10:00	4450	226.868	226.861	0.0069	0.497559			2017-08-13 12:09:59	4450	226.644	226.653	-0.0093	0.251483			2017-08-16 14:20:00	8900	21504	21642.8	-138.77	0.480586
2017-06-04 02:15:00	4455	226.869	226.861	0.00791	0.530426			2017-08-13 12:14:59	4455	226.645	226.653	-0.00827	0.285432			2017-08-16 14:30:00	8910	20352	21642.8	-1290.76	0.300598
2017-06-04 02:20:00	4460	226.868	226.861	0.00692	0.49821			2017-08-13 12:19:59	4460	226.644	226.653	-0.00924	0.253461			2017-08-16 14:40:00	8920	20992	21642.8	-650.756	0.400593
2017-06-04 02:25:00	4465	226.869	226.861	0.00793	0.531077			2017-08-13 12:24:59	4465	226.646	226.653	-0.00721	0.320369			2017-08-16 14:50:00	8930	19840	21642.7	-1802.75	0.220605
2017-06-04 02:30:00	4470	226.867	226.861	0.00594	0.46632			2017-08-13 12:29:59	4470	226.646	226.653	-0.00718	0.321358			2017-08-16 15:00:00	8940	20736	21642.7	-906.742	0.360598
2017-06-04 02:35:00	4475	226.869	226.861	0.00795	0.531728			2017-08-13 12:34:59	4475	226.646	226.653	-0.00715	0.322347			2017-08-16 15:10:00	8950	20992	21642.7	-650.735	0.400596
2017-06-04 02:40:00	4480	226.867	226.861	0.00596	0.46697			2017-08-13 12:39:59	4480	226.644	226.653	-0.00912	0.257416			2017-08-16 15:20:00	8960	21504	21642.7	-138.728	0.480593
2017-06-04 02:45:00	4485	226.868	226.861	0.00697	0.499837			2017-08-13 12:44:59	4485	226.645	226.653	-0.00809	0.291365			2017-08-16 15:30:00	8970	21248	21642.7	-394.721	0.440596
2017-06-04 02:50:00	4490	226.867	226.861	0.00598	0.467621			2017-08-13 12:49:59	4490	226.645	226.653	-0.00806	0.292353			2017-08-16 15:40:00	8980	21120	21642.7	-522.714	0.420598
2017-06-04 02:55:00	4495	226.869	226.861	0.00799	0.53303			2017-08-13 12:54:59	4495	226.644	226.653	-0.00903	0.260382			2017-08-16 15:50:00	8990	21120	21642.7	-522.707	0.4206
2017-06-04 03:00:00	4500	226.868	226.861	0.007	0.500814			2017-08-13 12:59:59	4500	226.645	226.653	-0.008	0.294331			2017-08-16 16:00:00	9000	21376	21642.7	-266.7	0.460598
2017-06-04 03:05:00	4505	226.865	226.861	0.00401	0.403514			2017-08-13 13:04:59	4505	226.641	226.653	-0.01197	0.163481			2017-08-16 16:10:00	9010	20352	21642.7	-1290.69	0.300609
2017-06-04 03:10:00	4510	226.868	226.861	0.00702	0.501464			2017-08-13 13:09:59	4510	226.645	226.653	-0.00794	0.296309			2017-08-16 16:20:00	9020	22400	21642.7	757.314	0.620591
2017-06-04 03:15:00	4515	226.867	226.861	0.00603	0.469248			2017-08-13 13:14:59	4515	226.644	226.653	-0.00891	0.264338			2017-08-16 16:30:00	9030	23168	21642.7	1525.32	0.740585
2017-06-04 03:20:00	4520	226.87	226.861	0.00904	0.567198			2017-08-13 13:19:59	4520	226.646	226.653	-0.00688	0.331246			2017-08-16 16:40:00	9040	20864	21642.7	-778.672	0.380607
2017-06-04 03:25:00	4525	226.869	226.861	0.00805	0.534982			2017-08-13 13:24:59	4525	226.645	226.653	-0.00785	0.299275			2017-08-16 16:50:00	9050	20864	21642.7	-778.665	0.380608
2017-06-04 03:30:00	4530	226.869	226.861	0.00806	0.535308			2017-08-13 13:29:59	4530	226.646	226.653	-0.00682	0.333223			2017-08-16 17:00:00	9060	20736	21642.7	-906.658	0.360611
2017-06-04 03:35:00	4535	226.868	226.861	0.00707	0.503091			2017-08-13 13:34:59	4535	226.645	226.653	-0.00779	0.301252			2017-08-16 17:10:00	9070	20736	21642.7	-906.651	0.360612
2017-06-04 03:40:00	4540	226.868	226.861	0.00708	0.503417			2017-08-13 13:39:59	4540	226.644	226.653	-0.00876	0.269281			2017-08-16 17:20:00	9080	20224	21642.6	-1418.64	0.280618
2017-06-04 03:45:00	4545	226.87	226.861	0.00909	0.568825			2017-08-13 13:44:59	4545	226.642	226.653	-0.01073	0.204351			2017-08-16 17:30:00	9090	19968	21642.6	-1674.64	0.240621
2017-06-04 03:50:00	4550	226.869	226.861	0.0081	0.536609			2017-08-13 13:49:59	4550	226.644	226.653	-0.0087	0.271259			2017-08-16 17:40:00	9100	21888	21642.6	245.37	0.540605
2017-06-04 03:55:00	4555	226.869	226.861	0.00811	0.536935			2017-08-13 13:54:59	4555	226.645	226.653	-0.00767	0.305208			2017-08-16 17:50:00	9110	20864	21642.6	-778.623	0.380615
2017-06-04 04:00:00	4560	226.867	226.861	0.00612	0.472177			2017-08-13 13:59:59	4560	226.644	226.653	-0.00864	0.273237			2017-08-16 18:00:00	9120	21120	21642.6	-522.616	0.420614
2017-06-04 04:05:00	4565	226.868	226.861	0.00713	0.505044			2017-08-13 14:04:59	4565	226.644	226.653	-0.00861	0.274225			2017-08-16 18:10:00	9130	21376	21642.6	-266.609	0.460613
2017-06-04 04:10:00	4570	226.868	226.861	0.00714	0.505369			2017-08-13 14:09:59	4570	226.645	226.653	-0.00758	0.308174			2017-08-16 18:20:00	9140	21504	21642.6	-138.602	0.480613
2017-06-04 04:15:00	4575	226.868	226.861	0.00715	0.505695			2017-08-13 14:14:59	4575	226.645	226.653	-0.00755	0.309163			2017-08-16 18:30:00	9150	20096	21642.6	-1546.6	0.260626
2017-06-04 04:20:00	4580	226.87	226.861	0.00916	0.571103			2017-08-13 14:19:59	4580	226.644	226.653	-0.00852	0.277192			2017-08-16 18:40:00	9160	22144	21642.6	501.412	0.580609
2017-06-04 04:25:00	4585	226.87	226.861	0.00917	0.571429			2017-08-13 14:24:59	4585	226.645	226.652	-0.00749	0.31114			2017-08-16 18:50:00	9170	21504	21642.6	-138.581	0.480616
2017-06-04 04:30:00	4590	226.868	226.861	0.00718	0.506671			2017-08-13 14:29:59	4590	226.644	226.652	-0.00846	0.279169			2017-08-16 19:00:00	9180	20096	21642.6	-1546.57	0.26063
2017-06-04 04:35:00	4595	226.867	226.861	0.00619	0.474455			2017-08-13 14:34:59	4595	226.644	226.652	-0.00843	0.280158			2017-08-16 19:10:00	9190	22528	21642.6	885.433	0.640609
2017-06-04 04:40:00	4600	226.869	226.861	0.0082	0.539863			2017-08-13 14:39:59	4600	226.644	226.652	-0.0084	0.281147			2017-08-16 19:20:00	9200	21632	21642.6	-10.56	0.500618
2017-06-04 04:45:00	4605	226.866	226.861	0.00521	0.442564			2017-08-13 14:44:59	4605	226.643	226.652	-0.00937	0.249176			2017-08-16 19:30:00	9210	21888	21642.6	245.447	0.540617
2017-06-04 04:50:00	4610	226.869	226.861	0.00822	0.540514			2017-08-13 14:49:59	4610	226.643	226.652	-0.00934	0.250165			2017-08-16 19:40:00	9220	21632	21642.5	-10.546	0.50062
2017-06-04 04:55:00	4615	226.868	226.861	0.00723	0.508298			2017-08-13 14:54:59	4615	226.644	226.652	-0.00831	0.284113			2017-08-16 19:50:00	9230	22400	21642.5	757.461	0.620614
2017-06-04 05:00:00	4620	226.867	226.861	0.00624	0.476082			2017-08-13 14:59:59	4620	226.644	226.652	-0.00828	0.285102			2017-08-16 20:00:00	9240	19712	21642.5	-1930.53	0.20064
2017-06-04 05:05:00	4625	226.867	226.861	0.00625	0.476407			2017-08-13 15:04:59	4625	226.644	226.652	-0.00825	0.286091			2017-08-16 20:10:00	9250	21632	21642.5	-10.525	0.500623
2017-06-04 05:10:00	4630	226.865	226.861	0.00426	0.41165			2017-08-13 15:09:59	4630	226.644	226.652	-0.00822	0.28708			2017-08-16 20:20:00	9260	22144	21642.5	501.482	0.58062
2017-06-04 05:15:00	4635	226.868	226.861	0.00727	0.5096			2017-08-13 15:14:59	4635	226.641	226.652	-0.01119	0.189189			2017-08-16 20:30:00	9270	22528	21642.5	885.489	0.640617
2017-06-04 05:20:00	4640	226.866	226.861	0.00528	0.444842			2017-08-13 15:19:59	4640	226.643	226.652	-0.00916	0.256098			2017-08-16 20:40:00	9280	21760	21642.5	117.496	0.520626
2017-06-04 05:25:00	4645	226.869	226.861	0.00829	0.542792			2017-08-13 15:24:59	4645	226.645	226.652	-0.00713	0.323006			2017-08-16 20:50:00	9290	21120	21642.5	-522.497	0.420632
2017-06-04 05:30:00	4650	226.869	226.861	0.0083	0.543117			2017-08-13 15:29:59	4650	226.641	226.652	-0.0111	0.192156			2017-08-16 21:00:00	9300	22912	21642.5	1269.51	0.700617
2017-06-04 05:35:00	4655	226.868	226.861	0.00731	0.510901			2017-08-13 15:34:59	4655	226.643	226.652	-0.00907	0.259064			2017-08-16 21:10:00	9310	22272	21642.5	629.517	0.600624
2017-06-04 05:40:00	4660	226.867	226.861	0.00632	0.478685			2017-08-13 15:39:59	4660	226.642	226.652	-0.01004	0.227093			2017-08-16 21:20:00	9320	21120	21642.5	-522.476	0.420636
2017-06-04 05:45:00	4665	226.87	226.861	0.00933	0.576635			2017-08-13 15:44:59	4665	226.642	226.652	-0.01001	0.228082			2017-08-16 21:30:00	9330	21888	21642.5	245.531	0.54063
2017-06-04 05:50:00	4670	226.869	226.861	0.00834	0.544419			2017-08-13 15:49:59	4670	226.641	226.652	-0.01098	0.196111			2017-08-16 21:40:00	9340	22784	21642.5	1141.54	0.680623
2017-06-04 05:55:00	4675	226.866	226.861	0.00535	0.44712			2017-08-13 15:54:59	4675	226.642	226.652	-0.00995	0.230059			2017-08-16 21:50:00	9350	23168	21642.5	1525.54	0.74062
2017-06-04 06:00:00	4680	226.869	226.861	0.00836	0.54507			2017-08-13 15:59:59	4680	226.644	226.652	-0.00792	0.296968			2017-08-16 22:00:00	9360	22016	21642.4	373.552	0.560632
2017-06-04 06:05:00	4685	226.866	226.861	0.00537	0.447771			2017-08-13 16:04:59	4685	226.643	226.652	-0.00889	0.264997			2017-08-16 22:10:00	9370	21504	21642.4	-138.441	0.480638
2017-06-04 06:10:00	4690	226.867	226.861	0.00638	0.480638			2017-08-13 16:09:59	4690	226.64	226.652	-0.01186	0.167106			2017-08-16 22:20:00	9380	20352	21642.4	-1290.43	0.300649
2017-06-04 06:15:00	4695	226.864	226.861	0.00339	0.383339			2017-08-13 16:14:59	4695	226.643	226.652	-0.00883	0.266974			2017-08-16 22:30:00	9390	22016	21642.4	373.573	0.560635
2017-06-04 06:20:00	4700	226.866	226.861	0.0054	0.448747			2017-08-13 16:19:59	4700	226.644	226.652	-0.0078	0.300923			2017-08-16 22:40:00	9400	22528	21642.4	885.58	0.640632
2017-06-04 06:25:00	4705	226.869	226.861	0.00841	0.546697			2017-08-13 16:24:59	4705	226.641	226.652	-0.01077	0.203032			2017-08-16 22:50:00	9410	21760	21642.4	117.587	0.52064
2017-06-04 06:30:00	4710	226.869	226.861	0.00842	0.547022			2017-08-13 16:29:59	4710	226.643	226.652	-0.00874	0.269941			2017-08-16 23:00:00	9420	21632	21642.4	-10.406	0.500642
2017-06-04 06:35:00	4715	226.869	226.861	0.00843	0.547348			2017-08-13 16:34:59	4715	226.644	226.652	-0.00771	0.303889			2017-08-16 23:10:00	9430	22272	21642.4	629.601	0.600637
2017-06-04 06:40:00	4720	226.866	226.861	0.00544	0.450049			2017-08-13 16:39:59	4720	226.643	226.652	-0.00868	0.271918			2017-08-16 23:20:00	9440	23936	21642.4	2293.61	0.860623
2017-06-04 06:45:00	4725	226.869	226.861	0.00845	0.547999			2017-08-13 16:44:59	4725	226.641	226.652	-0.01065	0.206987			2017-08-16 23:30:00	9450	21504	21642.4	-138.385	0.480646
2017-06-04 06:50:00	4730	226.869	226.861	0.00846	0.548324			2017-08-13 16:49:59	4730	226.642	226.652	-0.00962	0.240936			2017-08-16 23:40:00	9460	20608	21642.4	-1034.38	0.340656
2017-06-04 06:55:00	4735	226.869	226.861	0.00847	0.54865			2017-08-13 16:54:59	4735	226.642	226.652	-0.00959	0.241925			2017-08-16 23:50:00	9470	20864	21642.4	-778.371	0.380654
2017-06-04 07:00:00	4740	226.866	226.861	0.00548	0.45135			2017-08-13 16:59:59	4740	226.644	226.652	-0.00756	0.308833			2017-08-17	9480	23168	21642.4	1525.64	0.740635
2017-06-04 07:05:00	4745	226.866	226.861	0.00549	0.451676			2017-08-13 17:04:59	4745	226.643	226.652	-0.00853	0.276862			2017-08-17 00:10:00	9490	22656	21642.4	1013.64	0.66064
2017-06-04 07:10:00	4750	226.864	226.861	0.0035	0.386918			2017-08-13 17:09:59	4750	226.639	226.651	-0.0125	0.146012			2017-08-17 00:20:00	9500	22656	21642.3	1013.65	0.660641
2017-06-04 07:15:00	4755	226.866	226.86	0.00551	0.452327			2017-08-13 17:14:59	4755	226.642	226.651	-0.00947	0.24588			2017-08-17 00:30:00	9510	23168	21642.3	1525.66	0.740638
2017-06-04 07:20:00	4760	226.865	226.86	0.00452	0.420111			2017-08-13 17:19:59	4760	226.64	226.651	-0.01144	0.180949			2017-08-17 00:40:00	9520	21888	21642.3	245.664	0.540651
2017-06-04 07:25:00	4765	226.867	226.86	0.00653	0.485519			2017-08-13 17:24:59	4765	226.642	226.651	-0.00941	0.247858			2017-08-17 00:50:00	9530	23168	21642.3	1525.67	0.74064
2017-06-04 07:30:00	4770	226.867	226.86	0.00654	0.485844			2017-08-13 17:29:59	4770	226.642	226.651	-0.00938	0.248846			2017-08-17 01:00:00	9540	21632	21642.3	-10.322	0.500655
2017-06-04 07:35:00	4775	226.869	226.86	0.00855	0.551253			2017-08-13 17:34:59	4775	226.641	226.651	-0.01035	0.216875			2017-08-17 01:10:00	9550	22016	21642.3	373.685	0.560653
2017-06-04 07:40:00	4780	226.868	226.86	0.00756	0.519037			2017-08-13 17:39:59	4780	226.643	226.651	-0.00832	0.283784			2017-08-17 01:20:00	9560	20608	21642.3	-1034.31	0.340667
2017-06-04 07:45:00	4785	226.868	226.86	0.00757	0.519362			2017-08-13 17:44:59	4785	226.639	226.651	-0.01229	0.152933			2017-08-17 01:30:00	9570	23296	21642.3	1653.7	0.760643
2017-06-04 07:50:00	4790	226.869	226.86	0.00858	0.552229			2017-08-13 17:49:59	4790	226.644	226.651	-0.00726	0.318721			2017-08-17 01:40:00	9580	21632	21642.3	-10.294	0.500659
2017-06-04 07:55:00	4795	226.869	226.86	0.00859	0.552555			2017-08-13 17:54:59	4795	226.641	226.651	-0.01023	0.220831			2017-08-17 01:50:00	9590	22144	21642.3	501.713	0.580656
2017-06-04 08:00:00	4800	226.866	226.86	0.0056	0.455255			2017-08-13 17:59:59	4800	226.641	226.651	-0.0102	0.221819			2017-08-17 02:00:00	9600	21888	21642.3	245.72	0.540659
2017-06-04 08:05:00	4805	226.869	226.86	0.00861	0.553205			2017-08-13 18:04:59	4805	226.641	226.651	-0.01017	0.222808			2017-08-17 02:10:00	9610	22272	21642.3	629.727	0.600657
2017-06-04 08:10:00	4810	226.871	226.86	0.01062	0.618614			2017-08-13 18:09:59	4810	226.641	226.651	-0.01014	0.223797			2017-08-17 02:20:00	9620	21376	21642.3	-266.266	0.460666
2017-06-04 08:15:00	4815	226.867	226.86	0.00663	0.488773			2017-08-13 18:14:59	4815	226.641	226.651	-0.01011	0.224786			2017-08-17 02:30:00	9630	21632	21642.3	-10.259	0.500665
2017-06-04 08:20:00	4820	226.869	226.86	0.00864	0.554182			2017-08-13 18:19:59	4820	226.639	226.651	-0.01208	0.159855			2017-08-17 02:40:00	9640	23296	21642.3	1653.75	0.760651
2017-06-04 08:25:00	4825	226.87	226.86	0.00965	0.587048			2017-08-13 18:24:59	4825	226.641	226.651	-0.01005	0.226763			2017-08-17 02:50:00	9650	21376	21642.2	-266.245	0.460669
2017-06-04 08:30:00	4830	226.871	226.86	0.01066	0.619915			2017-08-13 18:29:59	4830	226.642	226.651	-0.00902	0.260712			2017-08-17 03:00:00	9660	21888	21642.2	245.762	0.540666
2017-06-04 08:35:00	4835	226.87	226.86	0.00967	0.587699			2017-08-13 18:34:59	4835	226.641	226.651	-0.00999	0.228741			2017-08-17 03:10:00	9670	23680	21642.2	2037.77	0.820651
2017-06-04 08:40:00	4840	226.868	226.86	0.00768	0.522942			2017-08-13 18:39:59	4840	226.64	226.651	-0.01096	0.19677			2017-08-17 03:20:00	9680	21888	21642.2	245.776	0.540668
2017-06-04 08:45:00	4845	226.867	226.86	0.00669	0.490726			2017-08-13 18:44:59	4845	226.639	226.651	-0.01193	0.164799			2017-08-17 03:30:00	9690	22144	21642.2	501.783	0.580667
2017-06-04 08:50:00	4850	226.868	226.86	0.0077	0.523593			2017-08-13 18:49:59	4850	226.64	226.651	-0.0109	0.198748			2017-08-17 03:40:00	9700	23040	21642.2	1397.79	0.72066
2017-06-04 08:55:00	4855	226.866	226.86	0.00571	0.458835			2017-08-13 18:54:59	4855	226.639	226.651	-0.01187	0.166777			2017-08-17 03:50:00	9710	21248	21642.2	-394.203	0.440677
2017-06-04 09:00:00	4860	226.867	226.86	0.00672	0.491702			2017-08-13 18:59:59	4860	226.64	226.651	-0.01084	0.200725			2017-08-17 04:00:00	9720	22528	21642.2	885.804	0.640667
2017-06-04 09:05:00	4865	226.869	226.86	0.00873	0.55711			2017-08-13 19:04:59	4865	226.638	226.651	-0.01281	0.135794			2017-08-17 04:10:00	9730	22016	21642.2	373.811	0.560672
2017-06-04 09:10:00	4870	226.869	226.86	0.00874	0.557436			2017-08-13 19:09:59	4870	226.639	226.651	-0.01178	0.169743			2017-08-17 04:20:00	9740	21760	21642.2	117.818	0.520676
2017-06-04 09:15:00	4875	226.867	226.86	0.00675	0.492678			2017-08-13 19:14:59	4875	226.64	226.651	-0.01075	0.203691			2017-08-17 04:30:00	9750	20992	21642.2	-650.175	0.400684
2017-06-04 09:20:00	4880	226.87	226.86	0.00976	0.590628			2017-08-13 19:19:59	4880	226.64	226.651	-0.01072	0.20468			2017-08-17 04:40:00	9760	22144	21642.2	501.832	0.580675
2017-06-04 09:25:00	4885	226.869	226.86	0.00877	0.558412			2017-08-13 19:24:59	4885	226.64	226.651	-0.01069	0.205669			2017-08-17 04:50:00	9770	21888	21642.2	245.839	0.540678
2017-06-04 09:30:00	4890	226.868	226.86	0.00778	0.526196			2017-08-13 19:29:59	4890	226.637	226.651	-0.01366	0.107779			2017-08-17 05:00:00	9780	20864	21642.2	-778.154	0.380688
2017-06-04 09:35:00	4895	226.87	226.86	0.00979	0.591604			2017-08-13 19:34:59	4895	226.64	226.651	-0.01063	0.207647			2017-08-17 05:10:00	9790	21376	21642.1	-266.147	0.460685
2017-06-04 09:40:00	4900	226.87	226.86	0.0098	0.59193			2017-08-13 19:39:59	4900	226.64	226.651	-0.0106	0.208635			2017-08-17 05:20:00	9800	22912	21642.1	1269.86	0.700672
2017-06-04 09:45:00	4905	226.868	226.86	0.00781	0.527172			2017-08-13 19:44:59	4905	226.64	226.651	-0.01057	0.209624			2017-08-17 05:30:00	9810	21376	21642.1	-266.133	0.460687
2017-06-04 09:50:00	4910	226.869	226.86	0.00882	0.560039			2017-08-13 19:49:59	4910	226.642	226.651	-0.00854	0.276533			2017-08-17 05:40:00	9820	21760	21642.1	117.874	0.520685
2017-06-04 09:55:00	4915	226.87	226.86	0.00983	0.592906			2017-08-13 19:54:59	4915	226.638	226.651	-0.01251	0.145682			2017-08-17 05:50:00	9830	22016	21642.1	373.881	0.560683
2017-06-04 10:00:00	4920	226.87	226.86	0.00984	0.593231			2017-08-13 19:59:59	4920	226.64	226.65	-0.01048	0.212591			2017-08-17 06:00:00	9840	22016	21642.1	373.888	0.560684
2017-06-04 10:05:00	4925	226.866	226.86	0.00585	0.463391			2017-08-13 20:04:59	4925	226.641	226.65	-0.00945	0.246539			2017-08-17 06:10:00	9850	21760	21642.1	117.895	0.520688
2017-06-04 10:10:00	4930	226.869	226.86	0.00886	0.561341			2017-08-13 20:09:59	4930	226.64	226.65	-0.01042	0.214568			2017-08-17 06:20:00	9860	21120	21642.1	-522.098	0.420695
2017-06-04 10:15:00	4935	226.87	226.86	0.00987	0.594208			2017-08-13 20:14:59	4935	226.641	226.65	-0.00939	0.248517			2017-08-17 06:30:00	9870	23424	21642.1	1781.91	0.780675
2017-06-04 10:20:00	4940	226.871	226.86	0.01088	0.627075			2017-08-13 20:19:59	4940	226.638	226.65	-0.01236	0.150626			2017-08-17 06:40:00	9880	22656	21642.1	1013.92	0.660683
2017-06-04 10:25:00	4945	226.871	226.86	0.01089	0.6274			2017-08-13 20:24:59	4945	226.64	226.65	-0.01033	0.217535			2017-08-17 06:50:00	9890	21632	21642.1	-10.077	0.500693
2017-06-04 10:30:00	4950	226.868	226.86	0.0079	0.530101			2017-08-13 20:29:59	4950	226.641	226.65	-0.0093	0.251483			2017-08-17 07:00:00	9900	21376	21642.1	-266.07	0.460697
2017-06-04 10:35:00	4955	226.87	226.86	0.00991	0.595509			2017-08-13 20:34:59	4955	226.641	226.65	-0.00927	0.252472			2017-08-17 07:10:00	9910	22528	21642.1	885.937	0.640687
2017-06-04 10:40:00	4960	226.874	226.86	0.01392	0.726001			2017-08-13 20:39:59	4960	226.64	226.65	-0.01024	0.220501			2017-08-17 07:20:00	9920	21888	21642.1	245.944	0.540694
2017-06-04 10:45:00	4965	226.87	226.86	0.00993	0.59616			2017-08-13 20:44:59	4965	226.638	226.65	-0.01221	0.15557			2017-08-17 07:30:00	9930	21632	21642	-10.049	0.500698
2017-06-04 10:50:00	4970	226.871	226.86	0.01094	0.629027			2017-08-13 20:49:59	4970	226.639	226.65	-0.01118	0.189519			2017-08-17 07:40:00	9940	22272	21642	629.958	0.600693
2017-06-04 10:55:00	4975	226.87	226.86	0.00995	0.596811			2017-08-13 20:54:59	4975	226.641	226.65	-0.00915	0.256427			2017-08-17 07:50:00	9950	21248	21642	-394.035	0.440703
2017-06-04 11:00:00	4980	226.871	226.86	0.01096	0.629678			2017-08-13 20:59:59	4980	226.637	226.65	-0.01312	0.125577			2017-08-17 08:00:00	9960	22272	21642	629.972	0.600695
2017-06-04 11:05:00	4985	226.871	226.86	0.01097	0.630003			2017-08-13 21:04:59	4985	226.637	226.65	-0.01309	0.126566			2017-08-17 08:10:00	9970	21248	21642	-394.021	0.440706
2017-06-04 11:10:00	4990	226.869	226.86	0.00898	0.565246			2017-08-13 21:09:59	4990	226.64	226.65	-0.01006	0.226434			2017-08-17 08:20:00	9980	21248	21642	-394.014	0.440707
2017-06-04 11:15:00	4995	226.873	226.86	0.01299	0.695737			2017-08-13 21:14:59	4995	226.639	226.65	-0.01103	0.194463			2017-08-17 08:30:00	9990	23296	21642	1653.99	0.760689
2017-06-04 11:20:00	5000	226.868	226.86	0.008	0.533355			2017-08-13 21:19:59	5000	226.641	226.65	-0.009	0.261371			2017-08-17 08:40:00	10000	22400	21642	758	0.620698
2017-06-04 11:25:00	5005	226.868	226.86	0.00801	0.53368			2017-08-13 21:24:59	5005	226.636	226.65	-0.01397	0.097561			2017-08-17 08:50:00	10010	22016	21642	374.007	0.560703
2017-06-04 11:30:00	5010	226.87	226.86	0.01002	0.599089			2017-08-13 21:29:59	5010	226.637	226.65	-0.01294	0.13151			2017-08-17 09:00:00	10020	22400	21642	758.014	0.620701
2017-06-04 11:35:00	5015	226.871	226.86	0.01103	0.631956			2017-08-13 21:34:59	5015	226.635	226.65	-0.01491	0.0665788			2017-08-17 09:10:00	10030	22400	21642	758.021	0.620702
2017-06-04 11:40:00	5020	226.87	226.86	0.01004	0.59974			2017-08-13 21:39:59	5020	226.639	226.65	-0.01088	0.199407			2017-08-17 09:20:00	10040	20608	21642	-1033.97	0.340719
2017-06-04 11:45:00	5025	226.87	226.86	0.01005	0.600065			2017-08-13 21:44:59	5025	226.638	226.65	-0.01185	0.167436			2017-08-17 09:30:00	10050	21888	21642	246.035	0.540709
2017-06-04 11:50:00	5030	226.871	226.86	0.01106	0.632932			2017-08-13 21:49:59	5030	226.636	226.65	-0.01382	0.102505			2017-08-17 09:40:00	10060	20864	21642	-777.958	0.380719
2017-06-04 11:55:00	5035	226.873	226.86	0.01307	0.69834			2017-08-13 21:54:59	5035	226.638	226.65	-0.01179	0.169413			2017-08-17 09:50:00	10070	21760	21642	118.049	0.520712
2017-06-04 12:00:00	5040	226.872	226.86	0.01208	0.666124			2017-08-13 21:59:59	5040	226.638	226.65	-0.01176	0.170402			2017-08-17 10:00:00	10080	21504	21641.9	-137.944	0.480715
2017-06-04 12:05:00	5045	226.87	226.86	0.01009	0.601367			2017-08-13 22:04:59	5045	226.64	226.65	-0.00973	0.23731			2017-08-17 10:10:00	10090	22656	21641.9	1014.06	0.660706
2017-06-04 12:10:00	5050	226.872	226.86	0.0121	0.666775			2017-08-13 22:09:59	5050	226.639	226.65	-0.0107	0.205339			2017-08-17 10:20:00	10100	22272	21641.9	630.07	0.600711
2017-06-04 12:15:00	5055	226.871	226.86	0.01111	0.634559			2017-08-13 22:14:59	5055	226.635	226.65	-0.01467	0.0744891			2017-08-17 10:30:00	10110	22016	21641.9	374.077	0.560714
2017-06-04 12:20:00	5060	226.87	226.86	0.01012	0.602343			2017-08-13 22:19:59	5060	226.639	226.65	-0.01064	0.207317			2017-08-17 10:40:00	10120	22016	21641.9	374.084	0.560715
2017-06-04 12:25:00	5065	226.87	226.86	0.01013	0.602668			2017-08-13 22:24:59	5065	226.639	226.65	-0.01061	0.208306			2017-08-17 10:50:00	10130	21888	21641.9	246.091	0.540717
2017-06-04 12:30:00	5070	226.873	226.86	0.01314	0.700618			2017-08-13 22:29:59	5070	226.64	226.65	-0.00958	0.242254			2017-08-17 11:00:00	10140	21632	21641.9	-9.902	0.500721
2017-06-04 12:35:00	5075	226.869	226.86	0.00915	0.570778			2017-08-13 22:34:59	5075	226.638	226.65	-0.01155	0.177324			2017-08-17 11:10:00	10150	22784	21641.9	1142.1	0.680711
2017-06-04 12:40:00	5080	226.872	226.86	0.01216	0.668728			2017-08-13 22:39:59	5080	226.639	226.65	-0.01052	0.211272			2017-08-17 11:20:00	10160	21376	21641.9	-265.888	0.460725
2017-06-04 12:45:00	5085	226.874	226.86	0.01417	0.734136			2017-08-13 22:44:59	5085	226.637	226.649	-0.01249	0.146341			2017-08-17 11:30:00	10170	22016	21641.9	374.119	0.560721
2017-06-04 12:50:00	5090	226.867	226.86	0.00718	0.506671			2017-08-13 22:49:59	5090	226.641	226.649	-0.00846	0.279169			2017-08-17 11:40:00	10180	21632	21641.9	-9.874	0.500725
2017-06-04 12:55:00	5095	226.87	226.86	0.01019	0.604621			2017-08-13 22:54:59	5095	226.639	226.649	-0.01043	0.214239			2017-08-17 11:50:00	10190	22016	21641.9	374.133	0.560723
2017-06-04 13:00:00	5100	226.871	226.86	0.0112	0.637488			2017-08-13 22:59:59	5100	226.64	226.649	-0.0094	0.248187			2017-08-17 12:00:00	10200	21888	21641.9	246.14	0.540725
2017-06-04 13:05:00	5105	226.872	226.86	0.01221	0.670355			2017-08-13 23:04:59	5105	226.637	226.649	-0.01237	0.150297			2017-08-17 12:10:00	10210	20736	21641.9	-905.853	0.360736
2017-06-04 13:10:00	5110	226.872	226.86	0.01222	0.67068			2017-08-13 23:09:59	5110	226.641	226.649	-0.00834	0.283125			2017-08-17 12:20:00	10220	23808	21641.8	2166.15	0.84071
2017-06-04 13:15:00	5115	226.874	226.86	0.01423	0.736089			2017-08-13 23:14:59	5115	226.638	226.649	-0.01131	0.185234			2017-08-17 12:30:00	10230	21760	21641.8	118.161	0.520729
2017-06-04 13:20:00	5120	226.871	226.86	0.01124	0.638789			2017-08-13 23:19:59	5120	226.639	226.649	-0.01028	0.219183			2017-08-17 12:40:00	10240	22400	21641.8	758.168	0.620725
2017-06-04 13:25:00	5125	226.87	226.86	0.01025	0.606573			2017-08-13 23:24:59	5125	226.639	226.649	-0.01025	0.220171			2017-08-17 12:50:00	10250	22144	21641.8	502.175	0.580728
2017-06-04 13:30:00	5130	226.87	226.86	0.01026	0.606899			2017-08-13 23:29:59	5130	226.642	226.649	-0.00722	0.32004			2017-08-17 13:00:00	10260	20352	21641.8	-1289.82	0.300745
2017-06-04 13:35:00	5135	226.871	226.86	0.01127	0.639766			2017-08-13 23:34:59	5135	226.638	226.649	-0.01119	0.189189			2017-08-17 13:10:00	10270	19840	21641.8	-1801.81	0.220751
2017-06-04 13:40:00	5140	226.868	226.86	0.00828	0.542467			2017-08-13 23:39:59	5140	226.636	226.649	-0.01316	0.124258			2017-08-17 13:20:00	10280	21376	21641.8	-265.804	0.460738
2017-06-04 13:45:00	5145	226.871	226.86	0.01129	0.640417			2017-08-13 23:44:59	5145	226.637	226.649	-0.01213	0.158207			2017-08-17 13:30:00	10290	21760	21641.8	118.203	0.520736
2017-06-04 13:50:00	5150	226.872	226.86	0.0123	0.673283			2017-08-13 23:49:59	5150	226.642	226.649	-0.0071	0.323995			2017-08-17 13:40:00	10300	20992	21641.8	-649.79	0.400744
2017-06-04 13:55:00	5155	226.871	226.86	0.01131	0.641067			2017-08-13 23:54:59	5155	226.64	226.649	-0.00907	0.259064			2017-08-17 13:50:00	10310	20608	21641.8	-1033.78	0.340749
2017-06-04 14:00:00	5160	226.87	226.86	0.01032	0.608851			2017-08-13 23:59:59	5160	226.639	226.649	-0.01004	0.227093			2017-08-17 14:00:00	10320	20992	21641.8	-649.776	0.400746
2017-06-04 14:05:00	5165	226.871	226.86	0.01133	0.641718			2017-08-14 00:04:59	5165	226.64	226.649	-0.00901	0.261042			2017-08-17 14:10:00	10330	20864	21641.8	-777.769	0.380748
2017-06-04 14:10:00	5170	226.873	226.86	0.01334	0.707127			2017-08-14 00:09:59	5170	226.639	226.649	-0.00998	0.229071			2017-08-17 14:20:00	10340	21632	21641.8	-9.762	0.500743
2017-06-04 14:15:00	5175	226.874	226.86	0.01435	0.739993			2017-08-14 00:14:59	5175	226.64	226.649	-0.00895	0.263019			2017-08-17 14:30:00	10350	20224	21641.8	-1417.76	0.280756
2017-06-04 14:20:00	5180	226.874	226.86	0.01436	0.740319			2017-08-14 00:19:59	5180	226.637	226.649	-0.01192	0.165129			2017-08-17 14:40:00	10360	20608	21641.7	-1033.75	0.340754
2017-06-04 14:25:00	5185	226.872	226.86	0.01237	0.675561			2017-08-14 00:24:59	5185	226.635	226.649	-0.01389	0.100198			2017-08-17 14:50:00	10370	21248	21641.7	-393.741	0.440749
2017-06-04 14:30:00	5190	226.869	226.86	0.00938	0.578262			2017-08-14 00:29:59	5190	226.639	226.649	-0.00986	0.233026			2017-08-17 15:00:00	10380	20864	21641.7	-777.734	0.380754
2017-06-04 14:35:00	5195	226.87	226.86	0.01039	0.611129			2017-08-14 00:34:59	5195	226.637	226.649	-0.01183	0.168095			2017-08-17 15:10:00	10390	19840	21641.7	-1801.73	0.220764
2017-06-04 14:40:00	5200	226.87	226.86	0.0104	0.611455			2017-08-14 00:39:59	5200	226.637	226.649	-0.0118	0.169084			2017-08-17 15:20:00	10400	19968	21641.7	-1673.72	0.240764
2017-06-04 14:45:00	5205	226.871	226.86	0.01141	0.644322			2017-08-14 00:44:59	5205	226.638	226.649	-0.01077	0.203032			2017-08-17 15:30:00	10410	21888	21641.7	246.287	0.540748
2017-06-04 14:50:00	5210	226.87	226.86	0.01042	0.612105			2017-08-14 00:49:59	5210	226.638	226.649	-0.01074	0.204021			2017-08-17 15:40:00	10420	21504	21641.7	-137.706	0.480753
2017-06-04 14:55:00	5215	226.872	226.86	0.01243	0.677514			2017-08-14 00:54:59	5215	226.64	226.649	-0.00871	0.270929			2017-08-17 15:50:00	10430	20480	21641.7	-1161.7	0.320763
2017-06-04 15:00:00	5220	226.872	226.86	0.01244	0.677839			2017-08-14 00:59:59	5220	226.637	226.649	-0.01168	0.173039			2017-08-17 16:00:00	10440	20608	21641.7	-1033.69	0.340763
2017-06-04 15:05:00	5225	226.874	226.86	0.01445	0.743248			2017-08-14 01:04:59	5225	226.639	226.649	-0.00965	0.239947			2017-08-17 16:10:00	10450	20480	21641.7	-1161.69	0.320765
2017-06-04 15:10:00	5230	226.872	226.86	0.01246	0.67849			2017-08-14 01:09:59	5230	226.64	226.649	-0.00862	0.273896			2017-08-17 16:20:00	10460	20864	21641.7	-777.678	0.380763
2017-06-04 15:15:00	5235	226.871	226.86	0.01147	0.646274			2017-08-14 01:14:59	5235	226.639	226.649	-0.00959	0.241925			2017-08-17 16:30:00	10470	20864	21641.7	-777.671	0.380764
2017-06-04 15:20:00	5240	226.872	226.86	0.01248	0.679141			2017-08-14 01:19:59	5240	226.639	226.649	-0.00956	0.242914			2017-08-17 16:40:00	10480	20608	21641.7	-1033.66	0.340767
2017-06-04 15:25:00	5245	226.869	226.86	0.00949	0.581842			2017-08-14 01:24:59	5245	226.64	226.649	-0.00853	0.276862			2017-08-17 16:50:00	10490	21120	21641.7	-521.657	0.420764
2017-06-04 15:30:00	5250	226.87	226.859	0.0105	0.614709			2017-08-14 01:29:59	5250	226.64	226.649	-0.0085	0.277851			2017-08-17 17:00:00	10500	20992	21641.7	-649.65	0.400766
2017-06-04 15:35:00	5255	226.87	226.859	0.01051	0.615034			2017-08-14 01:34:59	5255	226.64	226.648	-0.00847	0.27884			2017-08-17 17:10:00	10510	21120	21641.6	-521.643	0.420766
2017-06-04 15:40:00	5260	226.875	226.859	0.01552	0.778067			2017-08-14 01:39:59	5260	226.638	226.648	-0.01044	0.213909			2017-08-17 17:20:00	10520	20992	21641.6	-649.636	0.400768
2017-06-04 15:45:00	5265	226.871	226.859	0.01153	0.648226			2017-08-14 01:44:59	5265	226.638	226.648	-0.01041	0.214898			2017-08-17 17:30:00	10530	22784	21641.6	1142.37	0.680753
2017-06-04 15:50:00	5270	226.872	226.859	0.01254	0.681093			2017-08-14 01:49:59	5270	226.64	226.648	-0.00838	0.281806			2017-08-17 17:40:00	10540	20864	21641.6	-777.622	0.380771
2017-06-04 15:55:00	5275	226.873	226.859	0.01355	0.71396			2017-08-14 01:54:59	5275	226.636	226.648	-0.01235	0.150956			2017-08-17 17:50:00	10550	21888	21641.6	246.385	0.540763
2017-06-04 16:00:00	5280	226.87	226.859	0.01056	0.616661			2017-08-14 01:59:59	5280	226.639	226.648	-0.00932	0.250824			2017-08-17 18:00:00	10560	18432	21641.6	-3209.61	0.000795579
2017-06-04 16:05:00	5285	226.872	226.859	0.01257	0.68207			2017-08-14 02:04:59	5285	226.64	226.648	-0.00829	0.284773			2017-08-17 18:10:00	10570	22144	21641.6	502.399	0.580763
2017-06-04 16:10:00	5290	226.871	226.859	0.01158	0.649854			2017-08-14 02:09:59	5290	226.639	226.648	-0.00926	0.252802			2017-08-17 18:20:00	10580	20224	21641.6	-1417.59	0.280782
2017-06-04 16:15:00	5295	226.871	226.859	0.01159	0.650179			2017-08-14 02:14:59	5295	226.64	226.648	-0.00823	0.28675			2017-08-17 18:30:00	10590	21504	21641.6	-137.587	0.480771
2017-06-04 16:20:00	5300	226.872	226.859	0.0126	0.683046			2017-08-14 02:19:59	5300	226.64	226.648	-0.0082	0.287739			2017-08-17 18:40:00	10600	21120	21641.6	-521.58	0.420776
2017-06-04 16:25:00	5305	226.873	226.859	0.01361	0.715913			2017-08-14 02:24:59	5305	226.638	226.648	-0.01017	0.222808			2017-08-17 18:50:00	10610	21632	21641.6	-9.573	0.500772
2017-06-04 16:30:00	5310	226.873	226.859	0.01362	0.716238			2017-08-14 02:29:59	5310	226.639	226.648	-0.00914	0.256757			2017-08-17 19:00:00	10620	21888	21641.6	246.434	0.540771
2017-06-04 16:35:00	5315	226.872	226.859	0.01263	0.684022			2017-08-14 02:34:59	5315	226.64	226.648	-0.00811	0.290705			2017-08-17 19:10:00	10630	22016	21641.6	374.441	0.560771
2017-06-04 16:40:00	5320	226.871	226.859	0.01164	0.651806			2017-08-14 02:39:59	5320	226.639	226.648	-0.00908	0.258734			2017-08-17 19:20:00	10640	22016	21641.6	374.448	0.560772
2017-06-04 16:45:00	5325	226.873	226.859	0.01365	0.717214			2017-08-14 02:44:59	5325	226.641	226.648	-0.00705	0.325643			2017-08-17 19:30:00	10650	21376	21641.5	-265.545	0.460779
2017-06-04 16:50:00	5330	226.871	226.859	0.01166	0.652457			2017-08-14 02:49:59	5330	226.641	226.648	-0.00702	0.326632			2017-08-17 19:40:00	10660	21120	21641.5	-521.538	0.420782
2017-06-04 16:55:00	5335	226.872	226.859	0.01267	0.685324			2017-08-14 02:54:59	5335	226.64	226.648	-0.00799	0.294661			2017-08-17 19:50:00	10670	22272	21641.5	630.469	0.600773
2017-06-04 17:00:00	5340	226.873	226.859	0.01368	0.718191			2017-08-14 02:59:59	5340	226.635	226.648	-0.01296	0.13085			2017-08-17 20:00:00	10680	20992	21641.5	-649.524	0.400786
2017-06-04 17:05:00	5345	226.874	226.859	0.01469	0.751058			2017-08-14 03:04:59	5345	226.637	226.648	-0.01093	0.197759			2017-08-17 20:10:00	10690	21504	21641.5	-137.517	0.480782
2017-06-04 17:10:00	5350	226.873	226.859	0.0137	0.718842			2017-08-14 03:09:59	5350	226.637	226.648	-0.0109	0.198748			2017-08-17 20:20:00	10700	21888	21641.5	246.49	0.54078
2017-06-04 17:15:00	5355	226.87	226.859	0.01071	0.621542			2017-08-14 03:14:59	5355	226.639	226.648	-0.00887	0.265656			2017-08-17 20:30:00	10710	21248	21641.5	-393.503	0.440787
2017-06-04 17:20:00	5360	226.874	226.859	0.01472	0.752034			2017-08-14 03:19:59	5360	226.639	226.648	-0.00884	0.266645			2017-08-17 20:40:00	10720	19712	21641.5	-1929.5	0.200802
2017-06-04 17:25:00	5365	226.871	226.859	0.01173	0.654735			2017-08-14 03:24:59	5365	226.638	226.648	-0.00981	0.234674			2017-08-17 20:50:00	10730	22400	21641.5	758.511	0.620778
2017-06-04 17:30:00	5370	226.872	226.859	0.01274	0.687602			2017-08-14 03:29:59	5370	226.641	226.648	-0.00678	0.334542			2017-08-17 21:00:00	10740	22784	21641.5	1142.52	0.680776
2017-06-04 17:35:00	5375	226.87	226.859	0.01075	0.622844			2017-08-14 03:34:59	5375	226.638	226.648	-0.00975	0.236651			2017-08-17 21:10:00	10750	22272	21641.5	630.525	0.600782
2017-06-04 17:40:00	5380	226.872	226.859	0.01276	0.688253			2017-08-14 03:39:59	5380	226.638	226.648	-0.00972	0.23764			2017-08-17 21:20:00	10760	21248	21641.5	-393.468	0.440792
2017-06-04 17:45:00	5385	226.871	226.859	0.01177	0.656036			2017-08-14 03:44:59	5385	226.638	226.648	-0.00969	0.238629			2017-08-17 21:30:00	10770	20480	21641.5	-1161.46	0.3208
2017-06-04 17:50:00	5390	226.872	226.859	0.01278	0.688903			2017-08-14 03:49:59	5390	226.64	226.648	-0.00766	0.305537			2017-08-17 21:40:00	10780	21760	21641.5	118.546	0.52079
2017-06-04 17:55:00	5395	226.869	226.859	0.00979	0.591604			2017-08-14 03:54:59	5395	226.639	226.648	-0.00863	0.273566			2017-08-17 21:50:00	10790	22912	21641.4	1270.55	0.70078
2017-06-04 18:00:00	5400	226.87	226.859	0.0108	0.624471			2017-08-14 03:59:59	5400	226.64	226.648	-0.0076	0.307515			2017-08-17 22:00:00	10800	22016	21641.4	374.56	0.560789
2017-06-04 18:05:00	5405	226.869	226.859	0.00981	0.592255			2017-08-14 04:04:59	5405	226.64	226.648	-0.00757	0.308504			2017-08-17 22:10:00	10810	22016	21641.4	374.567	0.560791
2017-06-04 18:10:00	5410	226.871	226.859	0.01182	0.657664			2017-08-14 04:09:59	5410	226.64	226.648	-0.00754	0.309492			2017-08-17 22:20:00	10820	20224	21641.4	-1417.43	0.280808
2017-06-04 18:15:00	5415	226.871	226.859	0.01183	0.657989			2017-08-14 04:14:59	5415	226.636	226.648	-0.01151	0.178642			2017-08-17 22:30:00	10830	21760	21641.4	118.581	0.520795
2017-06-04 18:20:00	5420	226.873	226.859	0.01384	0.723397			2017-08-14 04:19:59	5420	226.634	226.647	-0.01348	0.113711			2017-08-17 22:40:00	10840	22784	21641.4	1142.59	0.680787
2017-06-04 18:25:00	5425	226.871	226.859	0.01185	0.65864			2017-08-14 04:24:59	5425	226.64	226.647	-0.00745	0.312459			2017-08-17 22:50:00	10850	21120	21641.4	-521.405	0.420803
2017-06-04 18:30:00	5430	226.87	226.859	0.01086	0.626424			2017-08-14 04:29:59	5430	226.639	226.647	-0.00842	0.280488			2017-08-17 23:00:00	10860	23168	21641.4	1526.6	0.740786
2017-06-04 18:35:00	5435	226.869	226.859	0.00987	0.594208			2017-08-14 04:34:59	5435	226.638	226.647	-0.00939	0.248517			2017-08-17 23:10:00	10870	21248	21641.4	-393.391	0.440804
2017-06-04 18:40:00	5440	226.871	226.859	0.01188	0.659616			2017-08-14 04:39:59	5440	226.639	226.647	-0.00836	0.282465			2017-08-17 23:20:00	10880	23040	21641.4	1398.62	0.720789
2017-06-04 18:45:00	5445	226.872	226.859	0.01289	0.692483			2017-08-14 04:44:59	5445	226.64	226.647	-0.00733	0.316414			2017-08-17 23:30:00	10890	21760	21641.4	118.623	0.520802
2017-06-04 18:50:00	5450	226.871	226.859	0.0119	0.660267			2017-08-14 04:49:59	5450	226.643	226.647	-0.0043	0.416282			2017-08-17 23:40:00	10900	21248	21641.4	-393.37	0.440807
2017-06-04 18:55:00	5455	226.871	226.859	0.01191	0.660592			2017-08-14 04:54:59	5455	226.64	226.647	-0.00727	0.318392			2017-08-17 23:50:00	10910	20992	21641.4	-649.363	0.400811
2017-06-04 19:00:00	5460	226.871	226.859	0.01192	0.660918			2017-08-14 04:59:59	5460	226.64	226.647	-0.00724	0.31938			2017-08-18	10920	22912	21641.4	1270.64	0.700794
2017-06-04 19:05:00	5465	226.873	226.859	0.01393	0.726326			2017-08-14 05:04:59	5465	226.64	226.647	-0.00721	0.320369			2017-08-18 00:10:00	10930	23168	21641.3	1526.65	0.740793
2017-06-04 19:10:00	5470	226.871	226.859	0.01194	0.661568			2017-08-14 05:09:59	5470	226.641	226.647	-0.00618	0.354318			2017-08-18 00:20:00	10940	23552	21641.3	1910.66	0.800791
2017-06-04 19:15:00	5475	226.87	226.859	0.01095	0.629352			2017-08-14 05:14:59	5475	226.638	226.647	-0.00915	0.256427			2017-08-18 00:30:00	10950	23296	21641.3	1654.67	0.760794
2017-06-04 19:20:00	5480	226.87	226.859	0.01096	0.629678			2017-08-14 05:19:59	5480	226.64	226.647	-0.00712	0.323336			2017-08-18 00:40:00	10960	22400	21641.3	758.672	0.620803
2017-06-04 19:25:00	5485	226.869	226.859	0.00997	0.597462			2017-08-14 05:24:59	5485	226.639	226.647	-0.00809	0.291365			2017-08-18 00:50:00	10970	21632	21641.3	-9.321	0.500812
2017-06-04 19:30:00	5490	226.87	226.859	0.01098	0.630329			2017-08-14 05:29:59	5490	226.638	226.647	-0.00906	0.259394			2017-08-18 01:00:00	10980	22272	21641.3	630.686	0.600807
2017-06-04 19:35:00	5495	226.87	226.859	0.01099	0.630654			2017-08-14 05:34:59	5495	226.639	226.647	-0.00803	0.293342			2017-08-18 01:10:00	10990	21504	21641.3	-137.307	0.480815
2017-06-04 19:40:00	5500	226.871	226.859	0.012	0.663521			2017-08-14 05:39:59	5500	226.639	226.647	-0.008	0.294331			2017-08-18 01:20:00	11000	21760	21641.3	118.7	0.520814
2017-06-04 19:45:00	5505	226.868	226.859	0.00901	0.566222			2017-08-14 05:44:59	5505	226.639	226.647	-0.00797	0.29532			2017-08-18 01:30:00	11010	20992	21641.3	-649.293	0.400822
2017-06-04 19:50:00	5510	226.869	226.859	0.01002	0.599089			2017-08-14 05:49:59	5510	226.639	226.647	-0.00794	0.296309			2017-08-18 01:40:00	11020	22016	21641.3	374.714	0.560814
2017-06-04 19:55:00	5515	226.871	226.859	0.01203	0.664497			2017-08-14 05:54:59	5515	226.64	226.647	-0.00691	0.330257			2017-08-18 01:50:00	11030	21888	21641.3	246.721	0.540816
2017-06-04 20:00:00	5520	226.872	226.859	0.01304	0.697364			2017-08-14 05:59:59	5520	226.641	226.647	-0.00588	0.364206			2017-08-18 02:00:00	11040	21632	21641.3	-9.272	0.500819
2017-06-04 20:05:00	5525	226.869	226.859	0.01005	0.600065			2017-08-14 06:04:59	5525	226.638	226.647	-0.00885	0.266315			2017-08-18 02:10:00	11050	22912	21641.3	1270.74	0.700809
2017-06-04 20:10:00	5530	226.869	226.859	0.01006	0.60039			2017-08-14 06:09:59	5530	226.639	226.647	-0.00782	0.300264			2017-08-18 02:20:00	11060	22016	21641.3	374.742	0.560818
2017-06-04 20:15:00	5535	226.869	226.859	0.01007	0.600716			2017-08-14 06:14:59	5535	226.636	226.647	-0.01079	0.202373			2017-08-18 02:30:00	11070	22016	21641.3	374.749	0.560819
2017-06-04 20:20:00	5540	226.871	226.859	0.01208	0.666124			2017-08-14 06:19:59	5540	226.637	226.647	-0.00976	0.236322			2017-08-18 02:40:00	11080	22016	21641.2	374.756	0.56082
2017-06-04 20:25:00	5545	226.871	226.859	0.01209	0.66645			2017-08-14 06:24:59	5545	226.638	226.647	-0.00873	0.27027			2017-08-18 02:50:00	11090	22400	21641.2	758.763	0.620818
2017-06-04 20:30:00	5550	226.87	226.859	0.0111	0.634234			2017-08-14 06:29:59	5550	226.639	226.647	-0.0077	0.304219			2017-08-18 03:00:00	11100	21248	21641.2	-393.23	0.440829
2017-06-04 20:35:00	5555	226.868	226.859	0.00911	0.569476			2017-08-14 06:34:59	5555	226.639	226.647	-0.00767	0.305208			2017-08-18 03:10:00	11110	21504	21641.2	-137.223	0.480828
2017-06-04 20:40:00	5560	226.87	226.859	0.01112	0.634884			2017-08-14 06:39:59	5560	226.638	226.647	-0.00864	0.273237			2017-08-18 03:20:00	11120	21632	21641.2	-9.216	0.500828
2017-06-04 20:45:00	5565	226.871	226.859	0.01213	0.667751			2017-08-14 06:44:59	5565	226.639	226.647	-0.00761	0.307185			2017-08-18 03:30:00	11130	23168	21641.2	1526.79	0.740815
2017-06-04 20:50:00	5570	226.87	226.859	0.01114	0.635535			2017-08-14 06:49:59	5570	226.636	226.647	-0.01058	0.209295			2017-08-18 03:40:00	11140	21888	21641.2	246.798	0.540828
2017-06-04 20:55:00	5575	226.868	226.859	0.00915	0.570778			2017-08-14 06:54:59	5575	226.637	226.647	-0.00955	0.243243			2017-08-18 03:50:00	11150	22272	21641.2	630.805	0.600825
2017-06-04 21:00:00	5580	226.87	226.859	0.01116	0.636186			2017-08-14 06:59:59	5580	226.638	226.647	-0.00852	0.277192			2017-08-18 04:00:00	11160	22272	21641.2	630.812	0.600827
2017-06-04 21:05:00	5585	226.869	226.859	0.01017	0.60397			2017-08-14 07:04:59	5585	226.639	226.646	-0.00749	0.31114			2017-08-18 04:10:00	11170	21760	21641.2	118.819	0.520832
2017-06-04 21:10:00	5590	226.871	226.859	0.01218	0.669378			2017-08-14 07:09:59	5590	226.64	226.646	-0.00646	0.345089			2017-08-18 04:20:00	11180	21376	21641.2	-265.174	0.460837
2017-06-04 21:15:00	5595	226.871	226.859	0.01219	0.669704			2017-08-14 07:14:59	5595	226.641	226.646	-0.00543	0.379038			2017-08-18 04:30:00	11190	20736	21641.2	-905.167	0.360844
2017-06-04 21:20:00	5600	226.868	226.859	0.0092	0.572405			2017-08-14 07:19:59	5600	226.637	226.646	-0.0094	0.248187			2017-08-18 04:40:00	11200	22400	21641.2	758.84	0.62083
2017-06-04 21:25:00	5605	226.868	226.859	0.00921	0.57273			2017-08-14 07:24:59	5605	226.64	226.646	-0.00637	0.348055			2017-08-18 04:50:00	11210	21760	21641.2	118.847	0.520837
2017-06-04 21:30:00	5610	226.872	226.859	0.01322	0.703222			2017-08-14 07:29:59	5610	226.639	226.646	-0.00734	0.316084			2017-08-18 05:00:00	11220	20992	21641.1	-649.146	0.400845
2017-06-04 21:35:00	5615	226.869	226.859	0.01023	0.605923			2017-08-14 07:34:59	5615	226.64	226.646	-0.00631	0.350033			2017-08-18 05:10:00	11230	21248	21641.1	-393.139	0.440843
2017-06-04 21:40:00	5620	226.868	226.859	0.00924	0.573706			2017-08-14 07:39:59	5620	226.638	226.646	-0.00828	0.285102			2017-08-18 05:20:00	11240	22400	21641.1	758.868	0.620834
2017-06-04 21:45:00	5625	226.871	226.859	0.01225	0.671656			2017-08-14 07:44:59	5625	226.64	226.646	-0.00625	0.352011			2017-08-18 05:30:00	11250	22016	21641.1	374.875	0.560839
2017-06-04 21:50:00	5630	226.868	226.859	0.00926	0.574357			2017-08-14 07:49:59	5630	226.638	226.646	-0.00822	0.28708			2017-08-18 05:40:00	11260	21120	21641.1	-521.118	0.420848
2017-06-04 21:55:00	5635	226.87	226.859	0.01127	0.639766			2017-08-14 07:54:59	5635	226.639	226.646	-0.00719	0.321028			2017-08-18 05:50:00	11270	21888	21641.1	246.889	0.540842
2017-06-04 22:00:00	5640	226.871	226.859	0.01228	0.672633			2017-08-14 07:59:59	5640	226.639	226.646	-0.00716	0.322017			2017-08-18 06:00:00	11280	20992	21641.1	-649.104	0.400851
2017-06-04 22:05:00	5645	226.869	226.859	0.01029	0.607875			2017-08-14 08:04:59	5645	226.641	226.646	-0.00513	0.388926			2017-08-18 06:10:00	11290	22144	21641.1	502.903	0.580842
2017-06-04 22:10:00	5650	226.872	226.859	0.0133	0.705825			2017-08-14 08:09:59	5650	226.641	226.646	-0.0051	0.389914			2017-08-18 06:20:00	11300	22400	21641.1	758.91	0.620841
2017-06-04 22:15:00	5655	226.87	226.859	0.01131	0.641067			2017-08-14 08:14:59	5655	226.64	226.646	-0.00607	0.357943			2017-08-18 06:30:00	11310	21632	21641.1	-9.083	0.500849
2017-06-04 22:20:00	5660	226.869	226.859	0.01032	0.608851			2017-08-14 08:19:59	5660	226.641	226.646	-0.00504	0.391892			2017-08-18 06:40:00	11320	21504	21641.1	-137.076	0.480851
2017-06-04 22:25:00	5665	226.869	226.859	0.01033	0.609177			2017-08-14 08:24:59	5665	226.64	226.646	-0.00601	0.359921			2017-08-18 06:50:00	11330	22656	21641.1	1014.93	0.660842
2017-06-04 22:30:00	5670	226.867	226.859	0.00834	0.544419			2017-08-14 08:29:59	5670	226.64	226.646	-0.00598	0.36091			2017-08-18 07:00:00	11340	21504	21641.1	-137.062	0.480853
2017-06-04 22:35:00	5675	226.869	226.859	0.01035	0.609828			2017-08-14 08:34:59	5675	226.639	226.646	-0.00695	0.328939			2017-08-18 07:10:00	11350	21504	21641.1	-137.055	0.480854
2017-06-04 22:40:00	5680	226.869	226.859	0.01036	0.610153			2017-08-14 08:39:59	5680	226.641	226.646	-0.00492	0.395847			2017-08-18 07:20:00	11360	22016	21641	374.952	0.560851
2017-06-04 22:45:00	5685	226.869	226.859	0.01037	0.610478			2017-08-14 08:44:59	5685	226.64	226.646	-0.00589	0.363876			2017-08-18 07:30:00	11370	21632	21641	-9.041	0.500855
2017-06-04 22:50:00	5690	226.869	226.859	0.01038	0.610804			2017-08-14 08:49:59	5690	226.635	226.646	-0.01086	0.200066			2017-08-18 07:40:00	11380	22912	21641	1270.97	0.700845
2017-06-04 22:55:00	5695	226.869	226.859	0.01039	0.611129			2017-08-14 08:54:59	5695	226.638	226.646	-0.00783	0.299934			2017-08-18 07:50:00	11390	21248	21641	-393.027	0.440861
2017-06-04 23:00:00	5700	226.87	226.859	0.0114	0.643996			2017-08-14 08:59:59	5700	226.641	226.646	-0.0048	0.399802			2017-08-18 08:00:00	11400	22400	21641	758.98	0.620852
2017-06-04 23:05:00	5705	226.869	226.859	0.01041	0.61178			2017-08-14 09:04:59	5705	226.638	226.646	-0.00777	0.301912			2017-08-18 08:10:00	11410	22528	21641	886.987	0.640852
2017-06-04 23:10:00	5710	226.868	226.859	0.00942	0.579564			2017-08-14 09:09:59	5710	226.639	226.646	-0.00674	0.33586			2017-08-18 08:20:00	11420	19968	21641	-1673.01	0.240876
2017-06-04 23:15:00	5715	226.867	226.859	0.00843	0.547348			2017-08-14 09:14:59	5715	226.637	226.646	-0.00871	0.270929			2017-08-18 08:30:00	11430	21632	21641	-8.999	0.500862
2017-06-04 23:20:00	5720	226.87	226.859	0.01144	0.645298			2017-08-14 09:19:59	5720	226.639	226.646	-0.00668	0.337838			2017-08-18 08:40:00	11440	22272	21641	631.008	0.600857
2017-06-04 23:25:00	5725	226.871	226.859	0.01245	0.678165			2017-08-14 09:24:59	5725	226.641	226.646	-0.00465	0.404746			2017-08-18 08:50:00	11450	22528	21641	887.015	0.640856
2017-06-04 23:30:00	5730	226.87	226.859	0.01146	0.645949			2017-08-14 09:29:59	5730	226.64	226.646	-0.00562	0.372775			2017-08-18 09:00:00	11460	22016	21641	375.022	0.560862
2017-06-04 23:35:00	5735	226.869	226.859	0.01047	0.613733			2017-08-14 09:34:59	5735	226.638	226.646	-0.00759	0.307844			2017-08-18 09:10:00	11470	22144	21641	503.029	0.580862
2017-06-04 23:40:00	5740	226.871	226.859	0.01248	0.679141			2017-08-14 09:39:59	5740	226.641	226.646	-0.00456	0.407713			2017-08-18 09:20:00	11480	22272	21641	631.036	0.600862
2017-06-04 23:45:00	5745	226.867	226.859	0.00849	0.5493			2017-08-14 09:44:59	5745	226.636	226.646	-0.00953	0.243902			2017-08-18 09:30:00	11490	21248	21641	-392.957	0.440872
2017-06-04 23:50:00	5750	226.87	226.858	0.0115	0.64725			2017-08-14 09:49:59	5750	226.641	226.645	-0.0045	0.40969			2017-08-18 09:40:00	11500	22272	21641	631.05	0.600864
2017-06-04 23:55:00	5755	226.87	226.858	0.01151	0.647576			2017-08-14 09:54:59	5755	226.639	226.645	-0.00647	0.344759			2017-08-18 09:50:00	11510	21632	21640.9	-8.943	0.500871
2017-06-05	5760	226.869	226.858	0.01052	0.61536			2017-08-14 09:59:59	5760	226.637	226.645	-0.00844	0.279829			2017-08-18 10:00:00	11520	21504	21640.9	-136.936	0.480873
2017-06-05 00:05:00	5765	226.866	226.858	0.00753	0.518061			2017-08-14 10:04:59	5765	226.64	226.645	-0.00541	0.379697			2017-08-18 10:10:00	11530	22528	21640.9	887.071	0.640865
2017-06-05 00:10:00	5770	226.871	226.858	0.01254	0.681093			2017-08-14 10:09:59	5770	226.639	226.645	-0.00638	0.347726			2017-08-18 10:20:00	11540	20864	21640.9	-776.922	0.380881
2017-06-05 00:15:00	5775	226.87	226.858	0.01155	0.648877			2017-08-14 10:14:59	5775	226.639	226.645	-0.00635	0.348715			2017-08-18 10:30:00	11550	21888	21640.9	247.085	0.540873
2017-06-05 00:20:00	5780	226.87	226.858	0.01156	0.649203			2017-08-14 10:19:59	5780	226.641	226.645	-0.00432	0.415623			2017-08-18 10:40:00	11560	22272	21640.9	631.092	0.60087
2017-06-05 00:25:00	5785	226.871	226.858	0.01257	0.68207			2017-08-14 10:24:59	5785	226.64	226.645	-0.00529	0.383652			2017-08-18 10:50:00	11570	23680	21640.9	2039.1	0.820859
2017-06-05 00:30:00	5790	226.872	226.858	0.01358	0.714937			2017-08-14 10:29:59	5790	226.639	226.645	-0.00626	0.351681			2017-08-18 11:00:00	11580	21504	21640.9	-136.894	0.480879
2017-06-05 00:35:00	5795	226.871	226.858	0.01259	0.68272			2017-08-14 10:34:59	5795	226.64	226.645	-0.00523	0.38563			2017-08-18 11:10:00	11590	21760	21640.9	119.113	0.520878
2017-06-05 00:40:00	5800	226.87	226.858	0.0116	0.650504			2017-08-14 10:39:59	5800	226.638	226.645	-0.0072	0.320699			2017-08-18 11:20:00	11600	23424	21640.9	1783.12	0.780864
2017-06-05 00:45:00	5805	226.869	226.858	0.01061	0.618288			2017-08-14 10:44:59	5805	226.639	226.645	-0.00617	0.354647			2017-08-18 11:30:00	11610	22784	21640.9	1143.13	0.680871
2017-06-05 00:50:00	5810	226.869	226.858	0.01062	0.618614			2017-08-14 10:49:59	5810	226.64	226.645	-0.00514	0.388596			2017-08-18 11:40:00	11620	21888	21640.9	247.134	0.54088
2017-06-05 00:55:00	5815	226.871	226.858	0.01263	0.684022			2017-08-14 10:54:59	5815	226.639	226.645	-0.00611	0.356625			2017-08-18 11:50:00	11630	22784	21640.9	1143.14	0.680873
2017-06-05 01:00:00	5820	226.868	226.858	0.00964	0.586723			2017-08-14 10:59:59	5820	226.638	226.645	-0.00708	0.324654			2017-08-18 12:00:00	11640	21888	21640.9	247.148	0.540882
2017-06-05 01:05:00	5825	226.867	226.858	0.00865	0.554507			2017-08-14 11:04:59	5825	226.639	226.645	-0.00605	0.358603			2017-08-18 12:10:00	11650	20352	21640.8	-1288.85	0.300897
2017-06-05 01:10:00	5830	226.868	226.858	0.00966	0.587374			2017-08-14 11:09:59	5830	226.64	226.645	-0.00502	0.392551			2017-08-18 12:20:00	11660	23168	21640.8	1527.16	0.740873
2017-06-05 01:15:00	5835	226.871	226.858	0.01267	0.685324			2017-08-14 11:14:59	5835	226.639	226.645	-0.00599	0.36058			2017-08-18 12:30:00	11670	22272	21640.8	631.169	0.600882
2017-06-05 01:20:00	5840	226.87	226.858	0.01168	0.653108			2017-08-14 11:19:59	5840	226.641	226.645	-0.00396	0.427488			2017-08-18 12:40:00	11680	22272	21640.8	631.176	0.600883
2017-06-05 01:25:00	5845	226.872	226.858	0.01369	0.718516			2017-08-14 11:24:59	5845	226.639	226.645	-0.00593	0.362558			2017-08-18 12:50:00	11690	21632	21640.8	-8.817	0.50089
2017-06-05 01:30:00	5850	226.871	226.858	0.0127	0.6863			2017-08-14 11:29:59	5850	226.642	226.645	-0.0029	0.462426			2017-08-18 13:00:00	11700	20992	21640.8	-648.81	0.400897
2017-06-05 01:35:00	5855	226.869	226.858	0.01071	0.621542			2017-08-14 11:34:59	5855	226.64	226.645	-0.00487	0.397495			2017-08-18 13:10:00	11710	21248	21640.8	-392.803	0.440896
2017-06-05 01:40:00	5860	226.871	226.858	0.01272	0.686951			2017-08-14 11:39:59	5860	226.64	226.645	-0.00484	0.398484			2017-08-18 13:20:00	11720	22784	21640.8	1143.2	0.680883
2017-06-05 01:45:00	5865	226.869	226.858	0.01073	0.622193			2017-08-14 11:44:59	5865	226.64	226.645	-0.00481	0.399473			2017-08-18 13:30:00	11730	20480	21640.8	-1160.79	0.320905
2017-06-05 01:50:00	5870	226.869	226.858	0.01074	0.622519			2017-08-14 11:49:59	5870	226.641	226.645	-0.00378	0.433421			2017-08-18 13:40:00	11740	21504	21640.8	-136.782	0.480897
2017-06-05 01:55:00	5875	226.871	226.858	0.01275	0.687927			2017-08-14 11:54:59	5875	226.642	226.645	-0.00275	0.46737			2017-08-18 13:50:00	11750	21888	21640.8	247.225	0.540895
2017-06-05 02:00:00	5880	226.869	226.858	0.01076	0.62317			2017-08-14 11:59:59	5880	226.639	226.645	-0.00572	0.369479			2017-08-18 14:00:00	11760	21376	21640.8	-264.768	0.4609
2017-06-05 02:05:00	5885	226.872	226.858	0.01377	0.721119			2017-08-14 12:04:59	5885	226.639	226.645	-0.00569	0.370468			2017-08-18 14:10:00	11770	21376	21640.8	-264.761	0.460901
2017-06-05 02:10:00	5890	226.871	226.858	0.01278	0.688903			2017-08-14 12:09:59	5890	226.64	226.645	-0.00466	0.404417			2017-08-18 14:20:00	11780	20864	21640.8	-776.754	0.380907
2017-06-05 02:15:00	5895	226.871	226.858	0.01279	0.689229			2017-08-14 12:14:59	5895	226.64	226.645	-0.00463	0.405405			2017-08-18 14:30:00	11790	22144	21640.7	503.253	0.580897
2017-06-05 02:20:00	5900	226.873	226.858	0.0148	0.754637			2017-08-14 12:19:59	5900	226.636	226.645	-0.0086	0.274555			2017-08-18 14:40:00	11800	21120	21640.7	-520.74	0.420907
2017-06-05 02:25:00	5905	226.87	226.858	0.01181	0.657338			2017-08-14 12:24:59	5905	226.639	226.645	-0.00557	0.374423			2017-08-18 14:50:00	11810	20736	21640.7	-904.733	0.360911
2017-06-05 02:30:00	5910	226.87	226.858	0.01182	0.657664			2017-08-14 12:29:59	5910	226.636	226.645	-0.00854	0.276533			2017-08-18 15:00:00	11820	21248	21640.7	-392.726	0.440908
2017-06-05 02:35:00	5915	226.869	226.858	0.01083	0.625447			2017-08-14 12:34:59	5915	226.641	226.645	-0.00351	0.44232			2017-08-18 15:10:00	11830	21760	21640.7	119.281	0.520904
2017-06-05 02:40:00	5920	226.872	226.858	0.01384	0.723397			2017-08-14 12:39:59	5920	226.64	226.644	-0.00448	0.410349			2017-08-18 15:20:00	11840	20352	21640.7	-1288.71	0.300918
2017-06-05 02:45:00	5925	226.87	226.858	0.01185	0.65864			2017-08-14 12:44:59	5925	226.639	226.644	-0.00545	0.378378			2017-08-18 15:30:00	11850	20864	21640.7	-776.705	0.380915
2017-06-05 02:50:00	5930	226.87	226.858	0.01186	0.658965			2017-08-14 12:49:59	5930	226.64	226.644	-0.00442	0.412327			2017-08-18 15:40:00	11860	20480	21640.7	-1160.7	0.320919
2017-06-05 02:55:00	5935	226.872	226.858	0.01387	0.724374			2017-08-14 12:54:59	5935	226.641	226.644	-0.00339	0.446276			2017-08-18 15:50:00	11870	22528	21640.7	887.309	0.640902
2017-06-05 03:00:00	5940	226.869	226.858	0.01088	0.627075			2017-08-14 12:59:59	5940	226.641	226.644	-0.00336	0.447264			2017-08-18 16:00:00	11880	21760	21640.7	119.316	0.52091
2017-06-05 03:05:00	5945	226.871	226.858	0.01289	0.692483			2017-08-14 13:04:59	5945	226.641	226.644	-0.00333	0.448253			2017-08-18 16:10:00	11890	20864	21640.7	-776.677	0.380919
2017-06-05 03:10:00	5950	226.871	226.858	0.0129	0.692808			2017-08-14 13:09:59	5950	226.64	226.644	-0.0043	0.416282			2017-08-18 16:20:00	11900	20352	21640.7	-1288.67	0.300925
2017-06-05 03:15:00	5955	226.87	226.858	0.01191	0.660592			2017-08-14 13:14:59	5955	226.641	226.644	-0.00327	0.450231			2017-08-18 16:30:00	11910	21248	21640.7	-392.663	0.440918
2017-06-05 03:20:00	5960	226.873	226.858	0.01492	0.758542			2017-08-14 13:19:59	5960	226.637	226.644	-0.00724	0.31938			2017-08-18 16:40:00	11920	20352	21640.7	-1288.66	0.300927
2017-06-05 03:25:00	5965	226.871	226.858	0.01293	0.693785			2017-08-14 13:24:59	5965	226.64	226.644	-0.00421	0.419249			2017-08-18 16:50:00	11930	22400	21640.6	759.351	0.62091
2017-06-05 03:30:00	5970	226.872	226.858	0.01394	0.726651			2017-08-14 13:29:59	5970	226.638	226.644	-0.00618	0.354318			2017-08-18 17:00:00	11940	20992	21640.6	-648.642	0.400923
2017-06-05 03:35:00	5975	226.872	226.858	0.01395	0.726977			2017-08-14 13:34:59	5975	226.639	226.644	-0.00515	0.388266			2017-08-18 17:10:00	11950	20224	21640.6	-1416.63	0.280931
2017-06-05 03:40:00	5980	226.868	226.858	0.00996	0.597136			2017-08-14 13:39:59	5980	226.643	226.644	-0.00112	0.521094			2017-08-18 17:20:00	11960	21376	21640.6	-264.628	0.460922
2017-06-05 03:45:00	5985	226.872	226.858	0.01397	0.727628			2017-08-14 13:44:59	5985	226.642	226.644	-0.00209	0.489123			2017-08-18 17:30:00	11970	20736	21640.6	-904.621	0.360929
2017-06-05 03:50:00	5990	226.87	226.858	0.01198	0.66287			2017-08-14 13:49:59	5990	226.643	226.644	-0.00106	0.523072			2017-08-18 17:40:00	11980	21120	21640.6	-520.614	0.420927
2017-06-05 03:55:00	5995	226.871	226.858	0.01299	0.695737			2017-08-14 13:54:59	5995	226.644	226.644	-3e-05	0.55702			2017-08-18 17:50:00	11990	20736	21640.6	-904.607	0.360931
2017-06-05 04:00:00	6000	226.872	226.858	0.014	0.728604			2017-08-14 13:59:59	6000	226.643	226.644	-0.001	0.525049			2017-08-18 18:00:00	12000	21120	21640.6	-520.6	0.420929
2017-06-05 04:05:00	6005	226.872	226.858	0.01401	0.728929			2017-08-14 14:04:59	6005	226.64	226.644	-0.00397	0.427159			2017-08-18 18:10:00	12010	21376	21640.6	-264.593	0.460928
2017-06-05 04:10:00	6010	226.872	226.858	0.01402	0.729255			2017-08-14 14:09:59	6010	226.641	226.644	-0.00294	0.461107			2017-08-18 18:20:00	12020	21120	21640.6	-520.586	0.420931
2017-06-05 04:15:00	6015	226.873	226.858	0.01503	0.762122			2017-08-14 14:14:59	6015	226.639	226.644	-0.00491	0.396177			2017-08-18 18:30:00	12030	20992	21640.6	-648.579	0.400933
2017-06-05 04:20:00	6020	226.871	226.858	0.01304	0.697364			2017-08-14 14:19:59	6020	226.64	226.644	-0.00388	0.430125			2017-08-18 18:40:00	12040	21760	21640.6	119.428	0.520927
2017-06-05 04:25:00	6025	226.872	226.858	0.01405	0.730231			2017-08-14 14:24:59	6025	226.641	226.644	-0.00285	0.464074			2017-08-18 18:50:00	12050	21504	21640.6	-136.565	0.480931
2017-06-05 04:30:00	6030	226.871	226.858	0.01306	0.698015			2017-08-14 14:29:59	6030	226.641	226.644	-0.00282	0.465063			2017-08-18 19:00:00	12060	21888	21640.6	247.442	0.540928
2017-06-05 04:35:00	6035	226.873	226.858	0.01507	0.763423			2017-08-14 14:34:59	6035	226.641	226.644	-0.00279	0.466051			2017-08-18 19:10:00	12070	22528	21640.6	887.449	0.640924
2017-06-05 04:40:00	6040	226.869	226.858	0.01108	0.633583			2017-08-14 14:39:59	6040	226.639	226.644	-0.00476	0.401121			2017-08-18 19:20:00	12080	20608	21640.5	-1032.54	0.340942
2017-06-05 04:45:00	6045	226.87	226.858	0.01209	0.66645			2017-08-14 14:44:59	6045	226.642	226.644	-0.00173	0.500989			2017-08-18 19:30:00	12090	21632	21640.5	-8.537	0.500934
2017-06-05 04:50:00	6050	226.873	226.858	0.0151	0.7644			2017-08-14 14:49:59	6050	226.639	226.644	-0.0047	0.403098			2017-08-18 19:40:00	12100	21120	21640.5	-520.53	0.42094
2017-06-05 04:55:00	6055	226.871	226.858	0.01311	0.699642			2017-08-14 14:54:59	6055	226.638	226.644	-0.00567	0.371127			2017-08-18 19:50:00	12110	22912	21640.5	1271.48	0.700925
2017-06-05 05:00:00	6060	226.871	226.858	0.01312	0.699967			2017-08-14 14:59:59	6060	226.639	226.644	-0.00464	0.405076			2017-08-18 20:00:00	12120	22144	21640.5	503.484	0.580933
2017-06-05 05:05:00	6065	226.87	226.858	0.01213	0.667751			2017-08-14 15:04:59	6065	226.641	226.644	-0.00261	0.471984			2017-08-18 20:10:00	12130	21120	21640.5	-520.509	0.420943
2017-06-05 05:10:00	6070	226.87	226.858	0.01214	0.668077			2017-08-14 15:09:59	6070	226.64	226.644	-0.00358	0.440013			2017-08-18 20:20:00	12140	22656	21640.5	1015.5	0.66093
2017-06-05 05:15:00	6075	226.872	226.858	0.01415	0.733485			2017-08-14 15:14:59	6075	226.639	226.644	-0.00455	0.408042			2017-08-18 20:30:00	12150	22144	21640.5	503.505	0.580936
2017-06-05 05:20:00	6080	226.87	226.858	0.01216	0.668728			2017-08-14 15:19:59	6080	226.64	226.644	-0.00352	0.441991			2017-08-18 20:40:00	12160	20096	21640.5	-1544.49	0.260956
2017-06-05 05:25:00	6085	226.873	226.858	0.01517	0.766678			2017-08-14 15:24:59	6085	226.64	226.643	-0.00349	0.44298			2017-08-18 20:50:00	12170	20736	21640.5	-904.481	0.360951
2017-06-05 05:30:00	6090	226.872	226.858	0.01418	0.734461			2017-08-14 15:29:59	6090	226.64	226.643	-0.00346	0.443968			2017-08-18 21:00:00	12180	21888	21640.5	247.526	0.540942
2017-06-05 05:35:00	6095	226.871	226.858	0.01319	0.702245			2017-08-14 15:34:59	6095	226.641	226.643	-0.00243	0.477917			2017-08-18 21:10:00	12190	22016	21640.5	375.533	0.560941
2017-06-05 05:40:00	6100	226.874	226.858	0.0162	0.800195			2017-08-14 15:39:59	6100	226.641	226.643	-0.0024	0.478906			2017-08-18 21:20:00	12200	20992	21640.5	-648.46	0.400952
2017-06-05 05:45:00	6105	226.871	226.858	0.01321	0.702896			2017-08-14 15:44:59	6105	226.641	226.643	-0.00237	0.479895			2017-08-18 21:30:00	12210	22528	21640.5	887.547	0.640939
2017-06-05 05:50:00	6110	226.869	226.858	0.01122	0.638139			2017-08-14 15:49:59	6110	226.64	226.643	-0.00334	0.447924			2017-08-18 21:40:00	12220	20736	21640.4	-904.446	0.360956
2017-06-05 05:55:00	6115	226.871	226.858	0.01323	0.703547			2017-08-14 15:54:59	6115	226.638	226.643	-0.00531	0.382993			2017-08-18 21:50:00	12230	20992	21640.4	-648.439	0.400955
2017-06-05 06:00:00	6120	226.868	226.858	0.01024	0.606248			2017-08-14 15:59:59	6120	226.639	226.643	-0.00428	0.416941			2017-08-18 22:00:00	12240	21504	21640.4	-136.432	0.480952
2017-06-05 06:05:00	6125	226.872	226.858	0.01425	0.736739			2017-08-14 16:04:59	6125	226.639	226.643	-0.00425	0.41793			2017-08-18 22:10:00	12250	22016	21640.4	375.575	0.560948
2017-06-05 06:10:00	6130	226.873	226.858	0.01526	0.769606			2017-08-14 16:09:59	6130	226.638	226.643	-0.00522	0.385959			2017-08-18 22:20:00	12260	22400	21640.4	759.582	0.620946
2017-06-05 06:15:00	6135	226.871	226.858	0.01327	0.704849			2017-08-14 16:14:59	6135	226.642	226.643	-0.00119	0.518787			2017-08-18 22:30:00	12270	20736	21640.4	-904.411	0.360962
2017-06-05 06:20:00	6140	226.874	226.858	0.01628	0.802799			2017-08-14 16:19:59	6140	226.64	226.643	-0.00316	0.453856			2017-08-18 22:40:00	12280	22272	21640.4	631.596	0.600949
2017-06-05 06:25:00	6145	226.868	226.858	0.01029	0.607875			2017-08-14 16:24:59	6145	226.639	226.643	-0.00413	0.421885			2017-08-18 22:50:00	12290	21760	21640.4	119.603	0.520955
2017-06-05 06:30:00	6150	226.873	226.858	0.0153	0.770908			2017-08-14 16:29:59	6150	226.637	226.643	-0.0061	0.356955			2017-08-18 23:00:00	12300	22144	21640.4	503.61	0.580952
2017-06-05 06:35:00	6155	226.87	226.858	0.01231	0.673609			2017-08-14 16:34:59	6155	226.64	226.643	-0.00307	0.456823			2017-08-18 23:10:00	12310	22528	21640.4	887.617	0.64095
2017-06-05 06:40:00	6160	226.872	226.858	0.01432	0.739017			2017-08-14 16:39:59	6160	226.639	226.643	-0.00404	0.424852			2017-08-18 23:20:00	12320	22144	21640.4	503.624	0.580955
2017-06-05 06:45:00	6165	226.872	226.858	0.01433	0.739343			2017-08-14 16:44:59	6165	226.639	226.643	-0.00401	0.42584			2017-08-18 23:30:00	12330	22016	21640.4	375.631	0.560957
2017-06-05 06:50:00	6170	226.871	226.858	0.01334	0.707127			2017-08-14 16:49:59	6170	226.639	226.643	-0.00398	0.426829			2017-08-18 23:40:00	12340	21248	21640.4	-392.362	0.440965
2017-06-05 06:55:00	6175	226.873	226.858	0.01535	0.772535			2017-08-14 16:54:59	6175	226.639	226.643	-0.00395	0.427818			2017-08-18 23:50:00	12350	21248	21640.4	-392.355	0.440966
2017-06-05 07:00:00	6180	226.872	226.858	0.01436	0.740319			2017-08-14 16:59:59	6180	226.636	226.643	-0.00692	0.329927			2017-08-19	12360	22656	21640.3	1015.65	0.660954
2017-06-05 07:05:00	6185	226.873	226.858	0.01537	0.773186			2017-08-14 17:04:59	6185	226.638	226.643	-0.00489	0.396836			2017-08-19 00:10:00	12370	23808	21640.3	2167.66	0.840945
2017-06-05 07:10:00	6190	226.872	226.858	0.01438	0.74097			2017-08-14 17:09:59	6190	226.64	226.643	-0.00286	0.463744			2017-08-19 00:20:00	12380	22272	21640.3	631.666	0.60096
2017-06-05 07:15:00	6195	226.87	226.858	0.01239	0.676212			2017-08-14 17:14:59	6195	226.637	226.643	-0.00583	0.365854			2017-08-19 00:30:00	12390	20992	21640.3	-648.327	0.400973
2017-06-05 07:20:00	6200	226.872	226.858	0.0144	0.741621			2017-08-14 17:19:59	6200	226.637	226.643	-0.0058	0.366842			2017-08-19 00:40:00	12400	21888	21640.3	247.68	0.540966
2017-06-05 07:25:00	6205	226.872	226.858	0.01441	0.741946			2017-08-14 17:24:59	6205	226.641	226.643	-0.00177	0.49967			2017-08-19 00:50:00	12410	22016	21640.3	375.687	0.560966
2017-06-05 07:30:00	6210	226.87	226.858	0.01242	0.677188			2017-08-14 17:29:59	6210	226.636	226.643	-0.00674	0.33586			2017-08-19 01:00:00	12420	22656	21640.3	1015.69	0.660961
2017-06-05 07:35:00	6215	226.871	226.858	0.01343	0.710055			2017-08-14 17:34:59	6215	226.636	226.643	-0.00671	0.336849			2017-08-19 01:10:00	12430	21120	21640.3	-520.299	0.420976
2017-06-05 07:40:00	6220	226.873	226.858	0.01544	0.775464			2017-08-14 17:39:59	6220	226.638	226.643	-0.00468	0.403757			2017-08-19 01:20:00	12440	21632	21640.3	-8.292	0.500972
2017-06-05 07:45:00	6225	226.87	226.858	0.01245	0.678165			2017-08-14 17:44:59	6225	226.634	226.643	-0.00865	0.272907			2017-08-19 01:30:00	12450	22784	21640.3	1143.72	0.680963
2017-06-05 07:50:00	6230	226.871	226.858	0.01346	0.711032			2017-08-14 17:49:59	6230	226.637	226.643	-0.00562	0.372775			2017-08-19 01:40:00	12460	20864	21640.3	-776.278	0.380981
2017-06-05 07:55:00	6235	226.872	226.858	0.01447	0.743898			2017-08-14 17:54:59	6235	226.636	226.643	-0.00659	0.340804			2017-08-19 01:50:00	12470	23168	21640.3	1527.73	0.740962
2017-06-05 08:00:00	6240	226.872	226.858	0.01448	0.744224			2017-08-14 17:59:59	6240	226.636	226.643	-0.00656	0.341793			2017-08-19 02:00:00	12480	22912	21640.3	1271.74	0.700965
2017-06-05 08:05:00	6245	226.872	226.858	0.01449	0.744549			2017-08-14 18:04:59	6245	226.637	226.643	-0.00553	0.375742			2017-08-19 02:10:00	12490	21120	21640.3	-520.257	0.420982
2017-06-05 08:10:00	6250	226.873	226.858	0.0155	0.777416			2017-08-14 18:09:59	6250	226.638	226.643	-0.0045	0.40969			2017-08-19 02:20:00	12500	22016	21640.2	375.75	0.560975
2017-06-05 08:15:00	6255	226.872	226.857	0.01451	0.7452			2017-08-14 18:14:59	6255	226.639	226.642	-0.00347	0.443639			2017-08-19 02:30:00	12510	21888	21640.2	247.757	0.540978
2017-06-05 08:20:00	6260	226.87	226.857	0.01252	0.680443			2017-08-14 18:19:59	6260	226.637	226.642	-0.00544	0.378708			2017-08-19 02:40:00	12520	22272	21640.2	631.764	0.600975
2017-06-05 08:25:00	6265	226.871	226.857	0.01353	0.713309			2017-08-14 18:24:59	6265	226.638	226.642	-0.00441	0.412657			2017-08-19 02:50:00	12530	20736	21640.2	-904.229	0.36099
2017-06-05 08:30:00	6270	226.87	226.857	0.01254	0.681093			2017-08-14 18:29:59	6270	226.637	226.642	-0.00538	0.380686			2017-08-19 03:00:00	12540	23680	21640.2	2039.78	0.820965
2017-06-05 08:35:00	6275	226.873	226.857	0.01555	0.779043			2017-08-14 18:34:59	6275	226.638	226.642	-0.00435	0.414634			2017-08-19 03:10:00	12550	23424	21640.2	1783.78	0.780968
2017-06-05 08:40:00	6280	226.872	226.857	0.01456	0.746827			2017-08-14 18:39:59	6280	226.637	226.642	-0.00532	0.382663			2017-08-19 03:20:00	12560	23040	21640.2	1399.79	0.720973
2017-06-05 08:45:00	6285	226.874	226.857	0.01657	0.812236			2017-08-14 18:44:59	6285	226.634	226.642	-0.00829	0.284773			2017-08-19 03:30:00	12570	20736	21640.2	-904.201	0.360995
2017-06-05 08:50:00	6290	226.871	226.857	0.01358	0.714937			2017-08-14 18:49:59	6290	226.639	226.642	-0.00326	0.45056			2017-08-19 03:40:00	12580	22784	21640.2	1143.81	0.680977
2017-06-05 08:55:00	6295	226.87	226.857	0.01259	0.68272			2017-08-14 18:54:59	6295	226.635	226.642	-0.00723	0.31971			2017-08-19 03:50:00	12590	21248	21640.2	-392.187	0.440992
2017-06-05 09:00:00	6300	226.871	226.857	0.0136	0.715587			2017-08-14 18:59:59	6300	226.635	226.642	-0.0072	0.320699			2017-08-19 04:00:00	12600	21504	21640.2	-136.18	0.480991
2017-06-05 09:05:00	6305	226.875	226.857	0.01761	0.846079			2017-08-14 19:04:59	6305	226.636	226.642	-0.00617	0.354647			2017-08-19 04:10:00	12610	22912	21640.2	1271.83	0.700979
2017-06-05 09:10:00	6310	226.874	226.857	0.01662	0.813863			2017-08-14 19:09:59	6310	226.636	226.642	-0.00614	0.355636			2017-08-19 04:20:00	12620	23552	21640.2	1911.83	0.800975
2017-06-05 09:15:00	6315	226.873	226.857	0.01563	0.781647			2017-08-14 19:14:59	6315	226.636	226.642	-0.00611	0.356625			2017-08-19 04:30:00	12630	22784	21640.2	1143.84	0.680983
2017-06-05 09:20:00	6320	226.873	226.857	0.01564	0.781972			2017-08-14 19:19:59	6320	226.634	226.642	-0.00808	0.291694			2017-08-19 04:40:00	12640	22272	21640.2	631.848	0.600988
2017-06-05 09:25:00	6325	226.874	226.857	0.01665	0.814839			2017-08-14 19:24:59	6325	226.637	226.642	-0.00505	0.391562			2017-08-19 04:50:00	12650	22016	21640.1	375.855	0.560992
2017-06-05 09:30:00	6330	226.872	226.857	0.01466	0.750081			2017-08-14 19:29:59	6330	226.636	226.642	-0.00602	0.359591			2017-08-19 05:00:00	12660	21760	21640.1	119.862	0.520995
2017-06-05 09:35:00	6335	226.876	226.857	0.01867	0.880573			2017-08-14 19:34:59	6335	226.639	226.642	-0.00299	0.459459			2017-08-19 05:10:00	12670	21120	21640.1	-520.131	0.421002
2017-06-05 09:40:00	6340	226.874	226.857	0.01668	0.815815			2017-08-14 19:39:59	6340	226.634	226.642	-0.00796	0.295649			2017-08-19 05:20:00	12680	21888	21640.1	247.876	0.540996
2017-06-05 09:45:00	6345	226.876	226.857	0.01869	0.881224			2017-08-14 19:44:59	6345	226.635	226.642	-0.00693	0.329598			2017-08-19 05:30:00	12690	22272	21640.1	631.883	0.600994
2017-06-05 09:50:00	6350	226.875	226.857	0.0177	0.849007			2017-08-14 19:49:59	6350	226.637	226.642	-0.0049	0.396506			2017-08-19 05:40:00	12700	22016	21640.1	375.89	0.560997
2017-06-05 09:55:00	6355	226.873	226.857	0.01571	0.78425			2017-08-14 19:54:59	6355	226.635	226.642	-0.00687	0.331575			2017-08-19 05:50:00	12710	23424	21640.1	1783.9	0.780986
2017-06-05 10:00:00	6360	226.875	226.857	0.01772	0.849658			2017-08-14 19:59:59	6360	226.637	226.642	-0.00484	0.398484			2017-08-19 06:00:00	12720	21120	21640.1	-520.096	0.421008
2017-06-05 10:05:00	6365	226.871	226.857	0.01373	0.719818			2017-08-14 20:04:59	6365	226.635	226.642	-0.00681	0.333553			2017-08-19 06:10:00	12730	21632	21640.1	-8.089	0.501004
2017-06-05 10:10:00	6370	226.873	226.857	0.01574	0.785226			2017-08-14 20:09:59	6370	226.632	226.642	-0.00978	0.235662			2017-08-19 06:20:00	12740	22144	21640.1	503.918	0.581
2017-06-05 10:15:00	6375	226.874	226.857	0.01675	0.818093			2017-08-14 20:14:59	6375	226.633	226.642	-0.00875	0.269611			2017-08-19 06:30:00	12750	22656	21640.1	1015.92	0.660997
2017-06-05 10:20:00	6380	226.873	226.857	0.01576	0.785877			2017-08-14 20:19:59	6380	226.632	226.642	-0.00972	0.23764			2017-08-19 06:40:00	12760	22784	21640.1	1143.93	0.680997
2017-06-05 10:25:00	6385	226.875	226.857	0.01777	0.851285			2017-08-14 20:24:59	6385	226.635	226.642	-0.00669	0.337508			2017-08-19 06:50:00	12770	23040	21640.1	1399.94	0.720996
2017-06-05 10:30:00	6390	226.875	226.857	0.01778	0.851611			2017-08-14 20:29:59	6390	226.635	226.642	-0.00666	0.338497			2017-08-19 07:00:00	12780	21248	21640.1	-392.054	0.441013
2017-06-05 10:35:00	6395	226.874	226.857	0.01679	0.819395			2017-08-14 20:34:59	6395	226.633	226.642	-0.00863	0.273566			2017-08-19 07:10:00	12790	22144	21640	503.953	0.581006
2017-06-05 10:40:00	6400	226.876	226.857	0.0188	0.884803			2017-08-14 20:39:59	6400	226.636	226.642	-0.0056	0.373434			2017-08-19 07:20:00	12800	21888	21640	247.96	0.541009
2017-06-05 10:45:00	6405	226.874	226.857	0.01681	0.820046			2017-08-14 20:44:59	6405	226.633	226.642	-0.00857	0.275544			2017-08-19 07:30:00	12810	22784	21640	1143.97	0.681002
2017-06-05 10:50:00	6410	226.875	226.857	0.01782	0.852912			2017-08-14 20:49:59	6410	226.635	226.642	-0.00654	0.342452			2017-08-19 07:40:00	12820	23040	21640	1399.97	0.721001
2017-06-05 10:55:00	6415	226.872	226.857	0.01483	0.755613			2017-08-14 20:54:59	6415	226.635	226.642	-0.00651	0.343441			2017-08-19 07:50:00	12830	21632	21640	-8.019	0.501015
2017-06-05 11:00:00	6420	226.876	226.857	0.01884	0.886105			2017-08-14 20:59:59	6420	226.632	226.641	-0.00948	0.24555			2017-08-19 08:00:00	12840	21376	21640	-264.012	0.461018
2017-06-05 11:05:00	6425	226.874	226.857	0.01685	0.821347			2017-08-14 21:04:59	6425	226.635	226.641	-0.00645	0.345419			2017-08-19 08:10:00	12850	21632	21640	-8.005	0.501017
2017-06-05 11:10:00	6430	226.874	226.857	0.01686	0.821673			2017-08-14 21:09:59	6430	226.634	226.641	-0.00742	0.313448			2017-08-19 08:20:00	12860	22912	21640	1272	0.701007
2017-06-05 11:15:00	6435	226.871	226.857	0.01387	0.724374			2017-08-14 21:14:59	6435	226.632	226.641	-0.00939	0.248517			2017-08-19 08:30:00	12870	20992	21640	-647.991	0.401025
2017-06-05 11:20:00	6440	226.874	226.857	0.01688	0.822323			2017-08-14 21:19:59	6440	226.633	226.641	-0.00836	0.282465			2017-08-19 08:40:00	12880	22912	21640	1272.02	0.701009
2017-06-05 11:25:00	6445	226.873	226.857	0.01589	0.790107			2017-08-14 21:24:59	6445	226.634	226.641	-0.00733	0.316414			2017-08-19 08:50:00	12890	22272	21640	632.023	0.601016
2017-06-05 11:30:00	6450	226.875	226.857	0.0179	0.855516			2017-08-14 21:29:59	6450	226.634	226.641	-0.0073	0.317403			2017-08-19 09:00:00	12900	21632	21640	-7.97	0.501023
2017-06-05 11:35:00	6455	226.875	226.857	0.01791	0.855841			2017-08-14 21:34:59	6455	226.636	226.641	-0.00527	0.384311			2017-08-19 09:10:00	12910	21888	21640	248.037	0.541021
2017-06-05 11:40:00	6460	226.875	226.857	0.01792	0.856167			2017-08-14 21:39:59	6460	226.633	226.641	-0.00824	0.286421			2017-08-19 09:20:00	12920	21888	21640	248.044	0.541022
2017-06-05 11:45:00	6465	226.874	226.857	0.01693	0.823951			2017-08-14 21:44:59	6465	226.631	226.641	-0.01021	0.22149			2017-08-19 09:30:00	12930	20992	21639.9	-647.949	0.401032
2017-06-05 11:50:00	6470	226.873	226.857	0.01594	0.791734			2017-08-14 21:49:59	6470	226.631	226.641	-0.01018	0.222479			2017-08-19 09:40:00	12940	22656	21639.9	1016.06	0.661018
2017-06-05 11:55:00	6475	226.874	226.857	0.01695	0.824601			2017-08-14 21:54:59	6475	226.634	226.641	-0.00715	0.322347			2017-08-19 09:50:00	12950	22528	21639.9	888.065	0.64102
2017-06-05 12:00:00	6480	226.873	226.857	0.01596	0.792385			2017-08-14 21:59:59	6480	226.634	226.641	-0.00712	0.323336			2017-08-19 10:00:00	12960	21760	21639.9	120.072	0.521028
2017-06-05 12:05:00	6485	226.875	226.857	0.01797	0.857794			2017-08-14 22:04:59	6485	226.633	226.641	-0.00809	0.291365			2017-08-19 10:10:00	12970	22144	21639.9	504.079	0.581026
2017-06-05 12:10:00	6490	226.872	226.857	0.01498	0.760495			2017-08-14 22:09:59	6490	226.633	226.641	-0.00806	0.292353			2017-08-19 10:20:00	12980	21248	21639.9	-391.914	0.441035
2017-06-05 12:15:00	6495	226.873	226.857	0.01599	0.793362			2017-08-14 22:14:59	6495	226.632	226.641	-0.00903	0.260382			2017-08-19 10:30:00	12990	22784	21639.9	1144.09	0.681022
2017-06-05 12:20:00	6500	226.874	226.857	0.017	0.826228			2017-08-14 22:19:59	6500	226.63	226.641	-0.011	0.195452			2017-08-19 10:40:00	13000	23296	21639.9	1656.1	0.761019
2017-06-05 12:25:00	6505	226.871	226.857	0.01401	0.728929			2017-08-14 22:24:59	6505	226.633	226.641	-0.00797	0.29532			2017-08-19 10:50:00	13010	21248	21639.9	-391.893	0.441038
2017-06-05 12:30:00	6510	226.874	226.857	0.01702	0.826879			2017-08-14 22:29:59	6510	226.633	226.641	-0.00794	0.296309			2017-08-19 11:00:00	13020	22272	21639.9	632.114	0.60103
[truncated: 4,679 more rows]
